# Supplementary material for: Single-cell profiling of lncRNAs in human germ cells and molecular analysis reveals transcriptional regulation of LNC1845 on LHX8
Source: eLife. 2023 Jan 5;12:e78421. doi: 10.7554/eLife.78421 (PMC9859043; doi:10.7554/eLife.78421)
Supplement: Figure 4—figure supplement 1—source data 1. [file elife-78421-fig4-figsupp1-data1.zip]

Archive with 6 entries (6 files):
- Figure 4-figure supplement 1D-source data.pdf
- __MACOSX/._Figure 4-figure supplement 1D-source data.pdf
- Figure 4-figure supplement 1B-source data.pdf
- __MACOSX/._Figure 4-figure supplement 1B-source data.pdf
- Figure 4-figure supplement 1-source data 1.rar
- __MACOSX/._Figure 4-figure supplement 1-source data 1.rar
