# Supplementary material for: Single-cell profiling of lncRNAs in human germ cells and molecular analysis reveals transcriptional regulation of LNC1845 on LHX8
Source: eLife. 2023 Jan 5;12:e78421. doi: 10.7554/eLife.78421 (PMC9859043; doi:10.7554/eLife.78421)
Supplement: Figure 5—source data 1. [file elife-78421-fig5-data1.zip]

Archive with 6 entries (5 files):
- Figure 5C-source data 1.pdf
- __MACOSX/._Figure 5C-source data 1.pdf
- Figure 5-source data 1-1/
- __MACOSX/._Figure 5-source data 1-1
- Figure 5-source data 1-1/Figure 5C-source data 1.tif
- __MACOSX/Figure 5-source data 1-1/._Figure 5C-source data 1.tif
