# Supplementary material for: Single-cell profiling of lncRNAs in human germ cells and molecular analysis reveals transcriptional regulation of LNC1845 on LHX8
Source: eLife. 2023 Jan 5;12:e78421. doi: 10.7554/eLife.78421 (PMC9859043; doi:10.7554/eLife.78421)
Supplement: Supplementary file 1. [file elife-78421-supp1.xlsx]

## Sheet: Sheet1
female	5w	GC	484	568	588	606	500	525	458	442	503	525	473	538	515	462	517	529	437	415	514	477	573	401	424	547	564	439	535	403	585	339	388	507	454	354	580	499	635	386	570	544	630	588	473	556	511	385	590
		SOMA	436	362	263	358	445	524	351	257	393	271	282	312	426	468	570
	7w	GC	628	511	547	662	516	619	429	580	754	442	618	527	658	657	501	452	522	619	678	627	664	453	622	632	476	471	571	1037	505	486	616	490	521	714
		SOMA	245	312	298	368	295	293	333	319	330	402
	8w	GC	540	516	532	456	587	333	490	454	497	469	594	560	466	487	454	566	536	447	550	337	588	622	406	550	486	380	472	640	463	513	657	438	463	394	550	466	390	528	487	424
		SOMA	287	587	335
	10w	GC	280	259	312	383	436	201	247	346	295	384	267	280	205	159	322	237	291	293	260	214	242	268	258	283	247	207	196	272	224	319	315	216	315	392	300	331	145	174	257	239	285	262	160	260	237	356	337
		SOMA	189	117	217	165	145	157	247	191	199	179	158	175	133	143	150	187	224	157
	12w	GC	1108	666	658	519	629	1139	482	903	641	450	458	545	496	579	362	403	440	505	517	776	669	631	568	633	556	585	641	606	598	416	581	572	429	599	418	417	460	568	387	641	1098	498	466	614	623
		SOMA	385
	14w	GC	812	652	609	654	570	583	562	493	605	706	722	627	732	687	567	524	642	527	576	550	559	595	478	729	565	637	684	494	662	712	402	707	559	491	504	594	502	530	371	578	597	608	476	536	435	588	524
		SOMA	274	328	387	405	302	422	266	431	373	429	371	430	308	389	470	264	410	273	250	360	482	406	398	391	425	420	260	391	285	582	330	321	304	550	359	383	334	327	366	323	423	273	304	462	346	526	422
	18w	GC	367	432	715	315	320	367	267	394	323	507	358	397	201	282	262	353	174	260	415	384	499	311	745	356	208	357	374	711	317	300	409	583	600	465	444	509	359	384	411	456	1042	425	906	465	479	346	411
		SOMA	196	332	265	231	170	286	232	259	355	229	148	211	230	188	245	227	207	247	195	255	185	163	187	179	142	184	257	172	222	279	229	214	181	216	225	265	187	260	199	181	226	168	194	207	225	238	183
	20w	GC	422	492	502	431	472	517	374	387	379	431	444	439	1422	482	435	208	319	416	388	431	499	433	359	956	629	1209	542	588	627	683	532	785	925	192	573	468	746	628	338	497	768	412	367	597	471	483	434
		SOMA	273	225	194	279	273	243	182	258	297	269	231	314	488	270	277	251	167	205	272	654	269	236	336	188	220	233	327	414	269	203
	23w	GC	822	781	507	454	528	421	545	1063	1065	983	514	579	583	542	642	710	495	496	457	824	457	502	519	458	617	946	1406	382	769	1101	992	1057	650	343	713	604	207	608	853	677	909	912	856	764	652	595	690
		SOMA	389	338	348	313	288	369	379	157	568	391	306	475	337	247	256	323	285	271	318	339	266	347	316	317	239	607	357	278	463	255	256	295	246	205	404	325	247	180	303	279	263
	24w	GC	521	505	575	508	526	450	577	477	493	462	447	428	562	430	443	449	562	435	405	475	496	482	427	825	500	441	547	482	543	492	1179	603	1392	470	1105	306	798	514	620	590	635	536	548	526	571	447	497
		SOMA	324	226	344	269	304	223	190	321	284	258	347	204	214	207	260	258
	26w	GC	175	160	815	170	382	384	446	454	624	435	411	346	477	409	449	351	374	352	449
		SOMA	207	203	219	268	208	220	282	275	317	277
male	4w	GC	650	596	587	590	634	624	476	620	466	639	504	633	620	647	586	558	573	555	562	404	487	711	391	617	535	462	470	531	502	563	489	613	621	569	633	439	517
		SOMA	384	288	274	292
	9w	GC	710	695	685	836	752	692	741	692	774	660	838	707	638	612	748	652	618	538	689	648	488	810	601	722	703	727	857	623	607	476	600	695	649	658	611	587	592	709	617	677	574	533	493	576	575	702	588
		SOMA	366	345	333	267	309	335
	10w	GC	433	523	450	554	483	671	534	506	536	520	594	501	586	520	532	552	588	581	531	562	444	591	592	556	580	543	592	366	573	467	448	559	515	634	433	527	455	608	396	513	603	534
		SOMA	314	306	320	425	236	356	353	343	325	254	254	357
	19w	GC	595	560	594	589	478	408	572	616	602	576	590	557	685	674	648	590	676	680	619	659	687	850	1023	921	1026	642	1071	753	685	643	813	781	899	943	761	816	727	1372	741	1073	600	745	1052	901	1177	786	1091
		SOMA	348	209	270	330	340	253	257	259	240	332	299	244	329	213	372	254	262	295	235	213	389	403	247	328	185	349	241	271	320	204	207	274	232	249	383
	20w	GC	595	612	524	563	541	483	644	533	588	571	450	643	506	642	780	620	759	621	821	683	574	908	623	706	644	893	913	1040	1026	782	565	923	734	1197	704	637	724	657	633	563	473	757	937	948	697	588	695
		SOMA	307	462	323	391	323	280
	21w	GC	684	640	563	687	589	798	802	597	508	634	559	1005	599	518	451	394	783	645	365	585	769	632	527	474	551	791	631	615	531	438	868	664	756	690	551	455	595	673	617	569	530	621	312	735	443	414	303
		SOMA	270	233	308	233	245	274	279	247	277	341	352	273	393	465	323	265
	25w	GC	462	635	532	675	753	676	829	661	1339	971	1279	981	525	1057	1597	1121	860	846	446	1020	1060	991	884	541	944	478	573	721	635	1030	480	600	582	883	627	688	1075	614	696	850	523	1181	1097	713	869	646	870
		SOMA	369	191	195	236	197	232	321	256	258	400	273	244	184	248	290	202	307	175	244	179	298	167	251	333	332	260	222	204	236	288	290	218	437	466	268	380	221	268	311	226	246	301	268	249	338	267	253
[truncated: 151 more columns]
