# Supplementary material for: Single-cell profiling of lncRNAs in human germ cells and molecular analysis reveals transcriptional regulation of LNC1845 on LHX8
Source: eLife. 2023 Jan 5;12:e78421. doi: 10.7554/eLife.78421 (PMC9859043; doi:10.7554/eLife.78421)
Supplement: Supplementary file 3. [file elife-78421-supp3.xlsx]

## Sheet: fGC_Mitotic
ID
NONHSAG047641
NONHSAG006171
NONHSAG012027
NONHSAG006501
NONHSAG012848
NONHSAG002402
NONHSAG033597
NONHSAG033966
NONHSAG002485
NONHSAG006137
NONHSAG002037
NONHSAG027296
NONHSAG023936
NONHSAG017631
NONHSAG048786
NONHSAG013533
NONHSAG017678
NONHSAG013129
NONHSAG034657
NONHSAG055367
NONHSAG003958
NONHSAG049431
NONHSAG045331
NONHSAG041232
NONHSAG041684
NONHSAG020526
NONHSAG031610
NONHSAG031245
NONHSAG052732
NONHSAG021251
NONHSAG021620
NONHSAG025357
NONHSAG019831
NONHSAG029828
NONHSAG015323
NONHSAG005330
NONHSAG005373
NONHSAG032305
NONHSAG001607
NONHSAG009848
NONHSAG005708
NONHSAG043845
NONHSAG006021
NONHSAG054152
NONHSAG012779
NONHSAG037549
NONHSAG050015
NONHSAG013051
NONHSAG013012
NONHSAG044166
NONHSAG017529
NONHSAG030858
NONHSAG045261
NONHSAG020005
NONHSAG024927
NONHSAG020418
NONHSAG014154
NONHSAG049368
NONHSAG004530
NONHSAG031954
NONHSAG039745
NONHSAG025246
NONHSAG025247
NONHSAG015251
NONHSAG025207
NONHSAG011153
NONHSAG019316
NONHSAG047464
NONHSAG037471
NONHSAG047428
NONHSAG054412
NONHSAG050764
NONHSAG027401
NONHSAG048939
NONHSAG017416
NONHSAG038907
NONHSAG007097
NONHSAG045154
NONHSAG049257
NONHSAG049216
NONHSAG004050
NONHSAG029233
NONHSAG052557
NONHSAG000737
NONHSAG008199
NONHSAG025995
NONHSAG021409
NONHSAG036672
NONHSAG015559
NONHSAG005564
NONHSAG022131
NONHSAG047760
NONHSAG047392
NONHSAG037360
NONHSAG033223
NONHSAG054752
NONHSAG040290
NONHSAG050205
NONHSAG050698
NONHSAG027335
NONHSAG023277
NONHSAG048416
NONHSAG013655
NONHSAG048829
NONHSAG051753
NONHSAG038058
NONHSAG051755
NONHSAG038018
NONHSAG020274
NONHSAG051758
NONHSAG041314
NONHSAG014797
NONHSAG035423
NONHSAG018488
NONHSAG010249
NONHSAG029571
NONHSAG029572
NONHSAG008865
NONHSAG052898
NONHSAG029576
NONHSAG000219
NONHSAG042085
NONHSAG019993
NONHSAG011303
NONHSAG046598
NONHSAG042007
NONHSAG036932
NONHSAG036196
NONHSAG032875
NONHSAG053954
NONHSAG047200
NONHSAG043142
NONHSAG043102
NONHSAG001319
NONHSAG016507
NONHSAG033197
NONHSAG002453
NONHSAG050543
NONHSAG050585
NONHSAG050503
NONHSAG054606
NONHSAG048301
NONHSAG027268
NONHSAG040926
NONHSAG013995
NONHSAG013179
NONHSAG024220
NONHSAG030198
NONHSAG010540
NONHSAG049485
NONHSAG020538
NONHSAG010994
NONHSAG045348
NONHSAG025320
NONHSAG052785
NONHSAG052787
NONHSAG046854
NONHSAG026094
NONHSAG053066
NONHSAG053846
NONHSAG022776
NONHSAG053439
NONHSAG026427
NONHSAG016435
NONHSAG047139
NONHSAG012787
NONHSAG006891
NONHSAG016479
NONHSAG033046
NONHSAG023091
NONHSAG006077
NONHSAG054579
NONHSAG048685
NONHSAG044135
NONHSAG017902
NONHSAG044547
NONHSAG017169
NONHSAG038696
NONHSAG051169
NONHSAG051948
NONHSAG020837
NONHSAG010434
NONHSAG010807
NONHSAG031967
NONHSAG035659
NONHSAG021155
NONHSAG011161
NONHSAG046789
NONHSAG001174
NONHSAG022624
NONHSAG016320
NONHSAG047808
NONHSAG033753
NONHSAG054830
NONHSAG027862
NONHSAG030342
NONHSAG020316
NONHSAG031811
NONHSAG031812
NONHSAG004888
NONHSAG029613
NONHSAG008949
NONHSAG015930
NONHSAG042903
NONHSAG015154
NONHSAG032952
NONHSAG032953
NONHSAG001803
NONHSAG036278
NONHSAG005539
NONHSAG012520
NONHSAG050212
NONHSAG033647
NONHSAG027712
NONHSAG054726
NONHSAG023204
NONHSAG023617
NONHSAG048878
NONHSAG034332
NONHSAG017315
NONHSAG007360
NONHSAG030275
NONHSAG051761
NONHSAG024300
NONHSAG055045
NONHSAG014391
NONHSAG010210
NONHSAG014351
NONHSAG039902
NONHSAG018417
NONHSAG052822
NONHSAG021750
NONHSAG029993
NONHSAG042010
NONHSAG019140
NONHSAG042012
NONHSAG032060
NONHSAG046979
NONHSAG026546
NONHSAG012000
NONHSAG037262
NONHSAG050590
NONHSAG050596
NONHSAG054615
NONHSAG023996
NONHSAG054659
NONHSAG038734
NONHSAG003154
NONHSAG020952
NONHSAG003197
NONHSAG003937
NONHSAG041297
NONHSAG035361
NONHSAG018713
NONHSAG004665
NONHSAG004668
NONHSAG011612
NONHSAG036870
NONHSAG042397
NONHSAG042727
NONHSAG019448
NONHSAG026472
NONHSAG022701
NONHSAG022746
NONHSAG033870
NONHSAG054581
NONHSAG006083
NONHSAG016039
NONHSAG050815
NONHSAG044512
NONHSAG013441
NONHSAG013072
NONHSAG027539
NONHSAG030830
NONHSAG030011
NONHSAG040089
NONHSAG030463
NONHSAG017508
NONHSAG051173
NONHSAG007555
NONHSAG024984
NONHSAG014170
NONHSAG024948
NONHSAG035252
NONHSAG010815
NONHSAG052230
NONHSAG004962
NONHSAG010818
NONHSAG004556
NONHSAG004188
NONHSAG011171
NONHSAG021169
NONHSAG053372
NONHSAG011138
NONHSAG036314
NONHSAG026360
NONHSAG016372
NONHSAG037085
NONHSAG054022
NONHSAG023363
NONHSAG054025
NONHSAG006798
NONHSAG054026
NONHSAG050377
NONHSAG054809
NONHSAG044489
NONHSAG034412
NONHSAG034495
NONHSAG024090
NONHSAG034497
NONHSAG051474
NONHSAG020773
NONHSAG024053
NONHSAG003758
NONHSAG014881
NONHSAG049685
NONHSAG049234
NONHSAG018945
NONHSAG031452
NONHSAG041448
NONHSAG052160
NONHSAG052980
NONHSAG000305
NONHSAG008506
NONHSAG052577
NONHSAG004448
NONHSAG004449
NONHSAG015902
NONHSAG019639
NONHSAG036697
NONHSAG047379
NONHSAG012576
NONHSAG047748
NONHSAG037753
NONHSAG023291
NONHSAG023621
NONHSAG027394
NONHSAG023253
NONHSAG027396
NONHSAG030284
NONHSAG030289
NONHSAG024353
NONHSAG020623
NONHSAG030209
NONHSAG045061
NONHSAG010262
NONHSAG029180
NONHSAG000602
NONHSAG052834
NONHSAG029597
NONHSAG029107
NONHSAG025007
NONHSAG019978
NONHSAG032037
NONHSAG009535
NONHSAG022455
NONHSAG022865
NONHSAG037645
NONHSAG050193
NONHSAG006164
NONHSAG033918
NONHSAG027697
NONHSAG023189
NONHSAG030950
NONHSAG013157
NONHSAG049018
NONHSAG045329
NONHSAG025302
NONHSAG052316
NONHSAG019450
NONHSAG029408
NONHSAG009058
NONHSAG026488
NONHSAG012761
NONHSAG047935
NONHSAG033841
NONHSAG016086
NONHSAG012726
NONHSAG027580
NONHSAG050822
NONHSAG037168
NONHSAG006097
NONHSAG040091
NONHSAG044524
NONHSAG017184
NONHSAG044156
NONHSAG055240
NONHSAG020481
NONHSAG030067
NONHSAG020810
NONHSAG024583
NONHSAG030439
NONHSAG020895
NONHSAG020445
NONHSAG010410
NONHSAG045215
NONHSAG014594
NONHSAG052281
NONHSAG031533
NONHSAG052284
NONHSAG000425
NONHSAG004198
NONHSAG046761
NONHSAG004529
NONHSAG015242
NONHSAG011922
NONHSAG019714
NONHSAG001561
NONHSAG011929
NONHSAG001198
NONHSAG053798
NONHSAG047866
NONHSAG033771
NONHSAG054481
NONHSAG002252
NONHSAG054818
NONHSAG017031
NONHSAG013384
NONHSAG013345
NONHSAG030363
NONHSAG007452
NONHSAG003399
NONHSAG010383
NONHSAG041046
NONHSAG010756
NONHSAG018506
NONHSAG000351
NONHSAG010388
NONHSAG035114
NONHSAG039667
NONHSAG052503
NONHSAG021885
NONHSAG015583
NONHSAG032156
NONHSAG012913
NONHSAG016645
NONHSAG033624
NONHSAG023670
NONHSAG002557
NONHSAG048482
NONHSAG013684
NONHSAG040287
NONHSAG023639
NONHSAG013644
NONHSAG034352
NONHSAG007791
NONHSAG051745
NONHSAG049991
NONHSAG055439
NONHSAG045079
NONHSAG008486
NONHSAG029112
NONHSAG042401
NONHSAG025877
NONHSAG025017
NONHSAG015888
NONHSAG022010
NONHSAG022011

## Sheet: fGC_RA_responsive
ID
NONHSAG044240
NONHSAG045031
NONHSAG027331
NONHSAG003134
NONHSAG044397
NONHSAG028857
NONHSAG003433
NONHSAG040936
NONHSAG045351
NONHSAG041016
NONHSAG028894
NONHSAG004542
NONHSAG042985
NONHSAG000074
NONHSAG002234
NONHSAG002518
NONHSAG033442
NONHSAG032501
NONHSAG038858
NONHSAG047721
NONHSAG047145
NONHSAG023392
NONHSAG040155
NONHSAG012387
NONHSAG004900
NONHSAG044066
NONHSAG010939
NONHSAG039403
NONHSAG021257
NONHSAG003703
NONHSAG040660
NONHSAG032020
NONHSAG013386
NONHSAG016338
NONHSAG050455
NONHSAG003317
NONHSAG041775
NONHSAG049870
NONHSAG044893
NONHSAG042712
NONHSAG045237
NONHSAG037759
NONHSAG042713
NONHSAG040989
NONHSAG032662
NONHSAG023089
NONHSAG008650
NONHSAG035489
NONHSAG032531
NONHSAG013449
NONHSAG005272
NONHSAG006497
NONHSAG013033
NONHSAG032537
NONHSAG046963
NONHSAG054724
NONHSAG050538

## Sheet: fGC_Meiotic
ID
NONHSAG012805
NONHSAG012806
NONHSAG027251
NONHSAG054265
NONHSAG006997
NONHSAG044681
NONHSAG050947
NONHSAG017260
NONHSAG003995
NONHSAG051676
NONHSAG030108
NONHSAG007236
NONHSAG041646
NONHSAG041239
NONHSAG031697
NONHSAG000175
NONHSAG035388
NONHSAG031698
NONHSAG029411
NONHSAG029415
NONHSAG043021
NONHSAG043065
NONHSAG022318
NONHSAG037542
NONHSAG033813
NONHSAG037957
NONHSAG048670
NONHSAG027103
NONHSAG038642
NONHSAG030813
NONHSAG017118
NONHSAG038645
NONHSAG034956
NONHSAG055297
NONHSAG003027
NONHSAG051528
NONHSAG041577
NONHSAG049737
NONHSAG031543
NONHSAG039375
NONHSAG008222
NONHSAG039336
NONHSAG052665
NONHSAG000848
NONHSAG042635
NONHSAG026794
NONHSAG043320
NONHSAG027482
NONHSAG050724
NONHSAG006367
NONHSAG027406
NONHSAG048566
NONHSAG055550
NONHSAG034478
NONHSAG028543
NONHSAG014862
NONHSAG020307
NONHSAG041467
NONHSAG031066
NONHSAG029270
NONHSAG035947
NONHSAG019281
NONHSAG019203
NONHSAG015516
NONHSAG053612
NONHSAG005527
NONHSAG053659
NONHSAG043624
NONHSAG047729
NONHSAG050242
NONHSAG037329
NONHSAG027784
NONHSAG013610
NONHSAG040625
NONHSAG038870
NONHSAG017348
NONHSAG028435
NONHSAG045494
NONHSAG039974
NONHSAG035835
NONHSAG035879
NONHSAG052446
NONHSAG046964
NONHSAG029169
NONHSAG029579
NONHSAG046927
NONHSAG032467
NONHSAG036117
NONHSAG005009
NONHSAG016582
NONHSAG012892
NONHSAG022069
NONHSAG050998
NONHSAG044241
NONHSAG017272
NONHSAG013911
NONHSAG013585
NONHSAG034621
NONHSAG007240
NONHSAG013917
NONHSAG013918
NONHSAG038318
NONHSAG007658
NONHSAG041202
NONHSAG010585
NONHSAG045347
NONHSAG039083
NONHSAG000550
NONHSAG039413
NONHSAG010547
NONHSAG000142
NONHSAG052742
NONHSAG052335
NONHSAG029465
NONHSAG021266
NONHSAG029836
NONHSAG021227
NONHSAG011277
NONHSAG011279
NONHSAG032357
NONHSAG005388
NONHSAG047585
NONHSAG016066
NONHSAG016889
NONHSAG037146
NONHSAG037147
NONHSAG054534
NONHSAG044540
NONHSAG040484
NONHSAG017944
NONHSAG044589
NONHSAG044918
NONHSAG051980
NONHSAG017539
NONHSAG038698
NONHSAG024110
NONHSAG030418
NONHSAG028294
NONHSAG007918
NONHSAG041505
NONHSAG031105
NONHSAG039349
NONHSAG052269
NONHSAG029356
NONHSAG015266
NONHSAG022292
NONHSAG026356
NONHSAG012264
NONHSAG016776
NONHSAG037486
NONHSAG023350
NONHSAG023354
NONHSAG027825
NONHSAG040702
NONHSAG027088
NONHSAG013731
NONHSAG027827
NONHSAG044476
NONHSAG048536
NONHSAG048949
NONHSAG028594
NONHSAG028519
NONHSAG014015
NONHSAG008122
NONHSAG039646
NONHSAG025964
NONHSAG029289
NONHSAG029658
NONHSAG019258
NONHSAG015159
NONHSAG001845
NONHSAG032919
NONHSAG002538
NONHSAG013291
NONHSAG023615
NONHSAG027716
NONHSAG044325
NONHSAG044368
NONHSAG013665
NONHSAG044329
NONHSAG018454
NONHSAG039536
NONHSAG008015
NONHSAG021389
NONHSAG036982
NONHSAG019187
NONHSAG032804
NONHSAG019519
NONHSAG026581
NONHSAG016965
NONHSAG050181
NONHSAG006193
NONHSAG012828
NONHSAG027231
NONHSAG002878
NONHSAG050968
NONHSAG013921
NONHSAG013143
NONHSAG013514
NONHSAG013516
NONHSAG030166
NONHSAG034635
NONHSAG020581
NONHSAG039052
NONHSAG014658
NONHSAG000569
NONHSAG015342
NONHSAG032774
NONHSAG019899
NONHSAG015718
NONHSAG043080
NONHSAG009457
NONHSAG047557
NONHSAG037934
NONHSAG033429
NONHSAG040048
NONHSAG017546
NONHSAG003822
NONHSAG013408
NONHSAG034567
NONHSAG051995
NONHSAG038218
NONHSAG041146
NONHSAG004143
NONHSAG052645
NONHSAG029323
NONHSAG004516
NONHSAG000827
NONHSAG042283
NONHSAG011540
NONHSAG005650
NONHSAG022263
NONHSAG001967
NONHSAG005659
NONHSAG033353
NONHSAG054844
NONHSAG002656
NONHSAG040796
NONHSAG044447
NONHSAG040348
NONHSAG055530
NONHSAG051884
NONHSAG034088
NONHSAG030399
NONHSAG003346
NONHSAG041070
NONHSAG014800
NONHSAG052572
NONHSAG032965
NONHSAG015128
NONHSAG032556
NONHSAG005543
NONHSAG009608
NONHSAG043234
NONHSAG054361
NONHSAG037345
NONHSAG050635
NONHSAG048842
NONHSAG044707
NONHSAG003681
NONHSAG051730
NONHSAG051734
NONHSAG051327
NONHSAG051779
NONHSAG014361
NONHSAG035890
NONHSAG031711
NONHSAG004741
NONHSAG052832
NONHSAG039588
NONHSAG031389
NONHSAG039589
NONHSAG029518
NONHSAG021319
NONHSAG042846
NONHSAG036139
NONHSAG032409
NONHSAG001379
NONHSAG012461
NONHSAG016112
NONHSAG050930
NONHSAG016199
NONHSAG006127
NONHSAG017293
NONHSAG030997
NONHSAG024241
NONHSAG038706
NONHSAG028384
NONHSAG020557
NONHSAG020967
NONHSAG014294
NONHSAG035330
NONHSAG031600
NONHSAG010976
NONHSAG014258
NONHSAG039029
NONHSAG021613
NONHSAG052729
NONHSAG026075
NONHSAG047153
NONHSAG043055
NONHSAG047199
NONHSAG002730
NONHSAG016459
NONHSAG050864
NONHSAG050823
NONHSAG023483
NONHSAG054925
NONHSAG044930
NONHSAG017102
NONHSAG023408
NONHSAG007190
NONHSAG038633
NONHSAG017599
NONHSAG034946
NONHSAG038269
NONHSAG010040
NONHSAG024915
NONHSAG004930
NONHSAG029332
NONHSAG021994
NONHSAG015282
NONHSAG025278
NONHSAG019343
NONHSAG009392
NONHSAG005662
NONHSAG001932
NONHSAG053754
NONHSAG047822
NONHSAG016753
NONHSAG016756
NONHSAG033734
NONHSAG033736
NONHSAG040350
NONHSAG044412
NONHSAG030360
NONHSAG030361
NONHSAG038152
NONHSAG041491
NONHSAG020743
NONHSAG020788
NONHSAG018172
NONHSAG018500
NONHSAG014074
NONHSAG018545
NONHSAG049207
NONHSAG052990
NONHSAG010307
NONHSAG039214
NONHSAG018549
NONHSAG039219
NONHSAG025577
NONHSAG052919
NONHSAG032970
NONHSAG005553
NONHSAG001866
NONHSAG001825
NONHSAG047794
NONHSAG043615
NONHSAG047716
NONHSAG047759
NONHSAG040692
NONHSAG054748
NONHSAG027327
NONHSAG013601
NONHSAG040697
NONHSAG038822
NONHSAG048409
NONHSAG003652
NONHSAG038005
NONHSAG020261
NONHSAG049133
NONHSAG049137
NONHSAG049998
NONHSAG045409
NONHSAG004794
NONHSAG035497
NONHSAG035867
NONHSAG039929
NONHSAG011782
NONHSAG029528
NONHSAG042406
NONHSAG001341
NONHSAG005032
NONHSAG005445

## Sheet: fGC_Oogenesis
ID
NONHSAG035227
NONHSAG028271
NONHSAG011770
NONHSAG017540
NONHSAG051924
NONHSAG027034
NONHSAG023576
NONHSAG046985
NONHSAG022916
NONHSAG000016
NONHSAG015947
NONHSAG028274
NONHSAG027050
NONHSAG041422
NONHSAG014725
NONHSAG021117
NONHSAG007028
NONHSAG034738
NONHSAG050294
NONHSAG013359
NONHSAG055121
NONHSAG052006
NONHSAG049507
NONHSAG002640
NONHSAG012712
NONHSAG043174
NONHSAG030860
NONHSAG051946
NONHSAG010554
NONHSAG047211
NONHSAG039886
NONHSAG005312
NONHSAG004955
NONHSAG030135
NONHSAG051385
NONHSAG017131
NONHSAG027202
NONHSAG045055
NONHSAG029384
NONHSAG030137
NONHSAG035268
NONHSAG016061
NONHSAG004959
NONHSAG036651
NONHSAG035413
NONHSAG027653
NONHSAG052900
NONHSAG003888
NONHSAG020212
NONHSAG029519
NONHSAG039026
NONHSAG031956
NONHSAG014331
NONHSAG048307
NONHSAG029980
NONHSAG041017
NONHSAG021452
NONHSAG029533
NONHSAG027952
NONHSAG055148
NONHSAG036375
NONHSAG007660
NONHSAG005350
NONHSAG038687
NONHSAG013826
NONHSAG023767
NONHSAG012753
NONHSAG027956
NONHSAG022261
NONHSAG013840
NONHSAG016799
NONHSAG005352
NONHSAG003475
NONHSAG028314
NONHSAG036803
NONHSAG016944
NONHSAG013829
NONHSAG051273
NONHSAG015577
NONHSAG018540
NONHSAG037761
NONHSAG008022
NONHSAG037762
NONHSAG041334
NONHSAG031979
NONHSAG042703
NONHSAG052210
NONHSAG027823
NONHSAG019616
NONHSAG022844
NONHSAG038556
NONHSAG041337
NONHSAG029125
NONHSAG009699
NONHSAG000523
NONHSAG040560
NONHSAG041338
NONHSAG005091
NONHSAG026471
NONHSAG034218
NONHSAG028054
NONHSAG052511
NONHSAG009845
NONHSAG041637
NONHSAG027560
NONHSAG006463
NONHSAG017325
NONHSAG026606
NONHSAG029426
NONHSAG042878
NONHSAG041206
NONHSAG038295
NONHSAG041358
NONHSAG030496
NONHSAG038720
NONHSAG028354
NONHSAG031287
NONHSAG030921
NONHSAG042879
NONHSAG040416
NONHSAG030497
NONHSAG055631
NONHSAG028073
NONHSAG023659
NONHSAG020123
NONHSAG038298
NONHSAG039232
NONHSAG018581
NONHSAG005973
NONHSAG043239
NONHSAG017778
NONHSAG055071
NONHSAG013886
NONHSAG026920
NONHSAG049739
NONHSAG047441
NONHSAG023971
NONHSAG042181
NONHSAG017065
NONHSAG047890
NONHSAG010352
NONHSAG011590
NONHSAG022886
NONHSAG032394
NONHSAG050954
NONHSAG042183
NONHSAG013455
NONHSAG031439
NONHSAG040003
NONHSAG015051
NONHSAG040732
NONHSAG032820
NONHSAG009438
NONHSAG012384
NONHSAG020578
NONHSAG019227
NONHSAG019674
NONHSAG045417
NONHSAG046950
NONHSAG016559
NONHSAG005546
NONHSAG034557
NONHSAG034852
NONHSAG027451
NONHSAG048550
NONHSAG015352
NONHSAG048103
NONHSAG048551
NONHSAG015635
NONHSAG038316
NONHSAG018738
NONHSAG018022
NONHSAG052702
NONHSAG024635
NONHSAG018023
NONHSAG011896
NONHSAG027009
NONHSAG027751
NONHSAG029910
NONHSAG024636
NONHSAG013775
NONHSAG029911
NONHSAG048989
NONHSAG029782
NONHSAG029912
NONHSAG049794
NONHSAG023132
NONHSAG054006
NONHSAG014569
NONHSAG011481
NONHSAG051918
NONHSAG012989
NONHSAG003570
NONHSAG023569
NONHSAG003557
NONHSAG051919
NONHSAG017982
NONHSAG028115
NONHSAG018492
NONHSAG046841
NONHSAG048705
NONHSAG027195
NONHSAG040060
NONHSAG013796
NONHSAG034742
NONHSAG011780
NONHSAG001826
NONHSAG022642
NONHSAG032150
NONHSAG011768
NONHSAG017256
NONHSAG014719
NONHSAG053966
NONHSAG042670
NONHSAG046998
NONHSAG037119
NONHSAG037580
NONHSAG011633
NONHSAG051939
NONHSAG034184
NONHSAG014172
NONHSAG031941
NONHSAG015527
NONHSAG031799
NONHSAG041154
NONHSAG009212
NONHSAG051378
NONHSAG049518
NONHSAG041437
NONHSAG024245
NONHSAG005024
NONHSAG041438
NONHSAG017854
NONHSAG041451
NONHSAG027212
NONHSAG013964
NONHSAG010285
NONHSAG031960
NONHSAG020074
NONHSAG014755
NONHSAG034912
NONHSAG022682
NONHSAG030442
NONHSAG037156
NONHSAG017591
NONHSAG032177
NONHSAG029540
NONHSAG031964
NONHSAG026872
NONHSAG020208
NONHSAG023770
NONHSAG041459
NONHSAG024563
NONHSAG037736
NONHSAG051827
NONHSAG055452
NONHSAG019603
NONHSAG009389
NONHSAG030461
NONHSAG007504
NONHSAG018236
NONHSAG012019
NONHSAG018532
NONHSAG020227
NONHSAG020228
NONHSAG051115
NONHSAG025950
NONHSAG015866
NONHSAG039055
NONHSAG007673
NONHSAG030315
NONHSAG007674
NONHSAG055471
NONHSAG040833
NONHSAG010889
NONHSAG019623
NONHSAG019624
NONHSAG042287
NONHSAG028327
NONHSAG037621
NONHSAG052654
NONHSAG024153
NONHSAG048917
NONHSAG016805
NONHSAG013855
NONHSAG037622
NONHSAG032066
NONHSAG039204
NONHSAG013409
NONHSAG030484
NONHSAG035016
NONHSAG003352
NONHSAG011698
NONHSAG001900
NONHSAG037493
NONHSAG005946
NONHSAG024156
NONHSAG005230
NONHSAG030630
NONHSAG036552
NONHSAG001043
NONHSAG040558
NONHSAG049595
NONHSAG037626
NONHSAG053312
NONHSAG048502
NONHSAG049740
NONHSAG050644
NONHSAG044033
NONHSAG038866
NONHSAG052674
NONHSAG048503
NONHSAG052675
NONHSAG026615
NONHSAG041366
NONHSAG017783
NONHSAG048671
NONHSAG038435
NONHSAG042888
NONHSAG018128
NONHSAG001779
NONHSAG044614
NONHSAG036702
NONHSAG027856
NONHSAG038437
NONHSAG020580
NONHSAG036703
NONHSAG029452
NONHSAG013893
NONHSAG015194
NONHSAG051303
NONHSAG034697
NONHSAG038300
NONHSAG035337
NONHSAG039959
NONHSAG032814
NONHSAG009010
NONHSAG049317
NONHSAG032815
NONHSAG013464
NONHSAG038456
NONHSAG049318
NONHSAG035637
NONHSAG027595
NONHSAG041252
NONHSAG046947
NONHSAG054143
NONHSAG015640
NONHSAG025286
NONHSAG030392
NONHSAG007881
NONHSAG015641
NONHSAG023120
NONHSAG045443
NONHSAG033778
NONHSAG011737
NONHSAG037684
NONHSAG033062
NONHSAG001515
NONHSAG017955
NONHSAG045445
NONHSAG027449
NONHSAG019984
NONHSAG020021
NONHSAG024067
NONHSAG010963
NONHSAG012697
NONHSAG017394
NONHSAG028256
NONHSAG035802

## Sheet: mGC_Migrating
ID
NONHSAG054149
NONHSAG048779
NONHSAG027712
NONHSAG041152
NONHSAG035873
NONHSAG024539

## Sheet: mGC_Mitotic
ID
NONHSAG016888
NONHSAG040052
NONHSAG025302
NONHSAG042365
NONHSAG002775
NONHSAG019290
NONHSAG020620
NONHSAG010254
NONHSAG010818
NONHSAG013652
NONHSAG024948
NONHSAG040070
NONHSAG010256
NONHSAG002344
NONHSAG044397
NONHSAG016026
NONHSAG017828
NONHSAG032441
NONHSAG021284
NONHSAG053397
NONHSAG013655
NONHSAG044977
NONHSAG028871
NONHSAG016606
NONHSAG011922
NONHSAG015251
NONHSAG004224
NONHSAG014461
NONHSAG049523
NONHSAG031091
NONHSAG033966
NONHSAG022952
NONHSAG035114
NONHSAG016479
NONHSAG028723
NONHSAG036787
NONHSAG018501
NONHSAG036203
NONHSAG036932
NONHSAG034340
NONHSAG015987
NONHSAG011929
NONHSAG016909
NONHSAG033550
NONHSAG018504
NONHSAG027208
NONHSAG034920
NONHSAG010873
NONHSAG001428
NONHSAG021020
NONHSAG021750
NONHSAG020087
NONHSAG025210
NONHSAG031245
NONHSAG014782
NONHSAG023485
NONHSAG036671
NONHSAG047685
NONHSAG023039
NONHSAG015293
NONHSAG019316
NONHSAG027394
NONHSAG019330
NONHSAG021177
NONHSAG008021
NONHSAG023619
NONHSAG011815
NONHSAG018991
NONHSAG032916
NONHSAG006891
NONHSAG025947
NONHSAG019488
NONHSAG011105
NONHSAG000807
NONHSAG037913
NONHSAG040130
NONHSAG030047
NONHSAG037915
NONHSAG009848
NONHSAG053600
NONHSAG023800
NONHSAG021064
NONHSAG027268
NONHSAG017493
NONHSAG050075
NONHSAG038708
NONHSAG047707
NONHSAG029147
NONHSAG028933
NONHSAG046917
NONHSAG010487
NONHSAG037919
NONHSAG050503
NONHSAG015185
NONHSAG034819
NONHSAG013300
NONHSAG029597
NONHSAG052980
NONHSAG007123
NONHSAG044493
NONHSAG033315
NONHSAG051745
NONHSAG007573
NONHSAG031170
NONHSAG027715
NONHSAG005545
NONHSAG051747
NONHSAG054133
NONHSAG050242
NONHSAG037520
NONHSAG053791
NONHSAG050807
NONHSAG034571
NONHSAG008947
NONHSAG003968
NONHSAG018750
NONHSAG027888
NONHSAG012100
NONHSAG022758
NONHSAG053068
NONHSAG008386
NONHSAG015933
NONHSAG029333
NONHSAG013609
NONHSAG006501
NONHSAG021252
NONHSAG007727
NONHSAG012103
NONHSAG043142
NONHSAG025877
NONHSAG040476
NONHSAG033919
NONHSAG045173
NONHSAG037262
NONHSAG019995
NONHSAG017966
NONHSAG008981
NONHSAG022343
NONHSAG033206
NONHSAG013628
NONHSAG020480
NONHSAG012274
NONHSAG000305
NONHSAG015673
NONHSAG023880
NONHSAG043892
NONHSAG047352
NONHSAG017538
NONHSAG027327
NONHSAG017256
NONHSAG030121
NONHSAG009922
NONHSAG031794
NONHSAG030274
NONHSAG021406
NONHSAG001547
NONHSAG037580
NONHSAG010994
NONHSAG043169
NONHSAG029222
NONHSAG050433
NONHSAG049234
NONHSAG015527
NONHSAG042522
NONHSAG030422
NONHSAG004962
NONHSAG011918
NONHSAG012297
NONHSAG003595
NONHSAG011919
NONHSAG047656
NONHSAG009366
NONHSAG023738
NONHSAG013530
NONHSAG025487
NONHSAG011653
NONHSAG053259
NONHSAG042541
NONHSAG027929
NONHSAG007918
NONHSAG014771
NONHSAG024843
NONHSAG041176
NONHSAG005198
NONHSAG035858
NONHSAG030012
NONHSAG014774
NONHSAG047959
NONHSAG026427
NONHSAG031967
NONHSAG046888
NONHSAG050178
NONHSAG016653
NONHSAG044708
NONHSAG004273
NONHSAG009100
NONHSAG019028
NONHSAG047694
NONHSAG037471
NONHSAG051412
NONHSAG021611
NONHSAG030761
NONHSAG017167
NONHSAG015867
NONHSAG006718
NONHSAG044445
NONHSAG048056
NONHSAG007957
NONHSAG007806
NONHSAG043938
NONHSAG025226
NONHSAG001473
NONHSAG052503
NONHSAG012913
NONHSAG035897
NONHSAG050791
NONHSAG034095
NONHSAG041064
NONHSAG039074
NONHSAG030614
NONHSAG001474
NONHSAG054533
NONHSAG052093
NONHSAG002844
NONHSAG055325
NONHSAG015888
NONHSAG041080
NONHSAG008486
NONHSAG041797
NONHSAG055045
NONHSAG041798
NONHSAG023217
NONHSAG037360
NONHSAG042452
NONHSAG023089
NONHSAG003936
NONHSAG013443
NONHSAG016265
NONHSAG033175
NONHSAG010626
NONHSAG022010
NONHSAG042175
NONHSAG051173
NONHSAG049018
NONHSAG050947
NONHSAG015902
NONHSAG042306
NONHSAG044336
NONHSAG011153
NONHSAG055660
NONHSAG054128
NONHSAG045295
NONHSAG020435
NONHSAG022182
NONHSAG055367
NONHSAG013610
NONHSAG025285
NONHSAG004317
NONHSAG033197
NONHSAG033046
NONHSAG050686
NONHSAG020005
NONHSAG023836
NONHSAG000297
NONHSAG007730
NONHSAG031610
NONHSAG016881
NONHSAG049338
NONHSAG006083
NONHSAG033064
NONHSAG022332
NONHSAG047770
NONHSAG036745
NONHSAG028833
NONHSAG053209
NONHSAG009318
NONHSAG005143

## Sheet: mGC_Mitotic_arrest
ID
NONHSAG032869
NONHSAG026153
NONHSAG009587
NONHSAG043130
NONHSAG005038
NONHSAG005079
NONHSAG012880
NONHSAG043953
NONHSAG043913
NONHSAG026528
NONHSAG043915
NONHSAG047687
NONHSAG037692
NONHSAG037282
NONHSAG043137
NONHSAG016575
NONHSAG037611
NONHSAG012886
NONHSAG016125
NONHSAG033143
NONHSAG016578
NONHSAG033595
NONHSAG016989
NONHSAG037204
NONHSAG050531
NONHSAG033596
NONHSAG033597
NONHSAG050163
NONHSAG033147
NONHSAG027251
NONHSAG023930
NONHSAG054265
NONHSAG023972
NONHSAG037248
NONHSAG006587
NONHSAG027214
NONHSAG044641
NONHSAG027296
NONHSAG040951
NONHSAG054269
NONHSAG002818
NONHSAG023197
NONHSAG006508
NONHSAG017631
NONHSAG023117
NONHSAG013122
NONHSAG013942
NONHSAG023569
NONHSAG030140
NONHSAG013902
NONHSAG038300
NONHSAG030100
NONHSAG003990
NONHSAG038711
NONHSAG034611
NONHSAG040548
NONHSAG030142
NONHSAG013167
NONHSAG040549
NONHSAG013947
NONHSAG003172
NONHSAG055731
NONHSAG013538
NONHSAG030186
NONHSAG013128
NONHSAG034287
NONHSAG017639
NONHSAG003995
NONHSAG024292
NONHSAG034657
NONHSAG051633
NONHSAG038717
NONHSAG024252
NONHSAG038718
NONHSAG049470
NONHSAG003177
NONHSAG024253
NONHSAG007237
NONHSAG034619
NONHSAG028314
NONHSAG020155
NONHSAG045372
NONHSAG049473
NONHSAG028316
NONHSAG028767
NONHSAG010940
NONHSAG028728
NONHSAG020569
NONHSAG024628
NONHSAG028769
NONHSAG028319
NONHSAG035340
NONHSAG024629
NONHSAG049888
NONHSAG018735
NONHSAG010945
NONHSAG008780
NONHSAG049849
NONHSAG014269
NONHSAG018738
NONHSAG004232
NONHSAG014228
NONHSAG039077
NONHSAG029081
NONHSAG010908
NONHSAG021660
NONHSAG029861
NONHSAG025310
NONHSAG010909
NONHSAG035798
NONHSAG004685
NONHSAG004603
NONHSAG052775
NONHSAG035717
NONHSAG029042
NONHSAG052365
NONHSAG021211
NONHSAG039407
NONHSAG031289
NONHSAG029411
NONHSAG000136
NONHSAG056015
NONHSAG042780
NONHSAG008336
NONHSAG056016
NONHSAG008337
NONHSAG056017
NONHSAG042700
NONHSAG029456
NONHSAG029415
NONHSAG025316
NONHSAG000919
NONHSAG029826
NONHSAG042702
NONHSAG046435
NONHSAG042746
NONHSAG036891
NONHSAG042705
NONHSAG053050
NONHSAG001640
NONHSAG032753
NONHSAG032796
NONHSAG036404
NONHSAG036036
NONHSAG036487
NONHSAG009434
NONHSAG026862
NONHSAG032348
NONHSAG036038
NONHSAG009887
NONHSAG001646
NONHSAG036408
NONHSAG043061
NONHSAG009478
NONHSAG009479
NONHSAG005708
NONHSAG053428
NONHSAG005749
NONHSAG043022
NONHSAG012730
NONHSAG026868
NONHSAG016421
NONHSAG047124
NONHSAG043845
NONHSAG047125
NONHSAG043887
NONHSAG016054
NONHSAG047538
NONHSAG033812
NONHSAG012736
NONHSAG033402
NONHSAG033403
NONHSAG012779
NONHSAG033405
NONHSAG054973
NONHSAG050463
NONHSAG033406
NONHSAG027592
NONHSAG023452
NONHSAG050875
NONHSAG050056
NONHSAG050057
NONHSAG040881
NONHSAG027103
NONHSAG023413
NONHSAG050058
NONHSAG027186
NONHSAG054568
NONHSAG040021
NONHSAG044901
NONHSAG013091
NONHSAG027515
NONHSAG027517
NONHSAG040024
NONHSAG013052
NONHSAG013421
NONHSAG027969
NONHSAG027928
NONHSAG048678
NONHSAG013875
NONHSAG038642
NONHSAG007160
NONHSAG003840
NONHSAG034912
NONHSAG017936
NONHSAG034174
NONHSAG007982
NONHSAG038644
NONHSAG013017
NONHSAG007162
NONHSAG003842
NONHSAG034914
NONHSAG017979
NONHSAG038686
NONHSAG017528
NONHSAG030486
NONHSAG013469
NONHSAG051194
NONHSAG051932
NONHSAG020491
NONHSAG038687
NONHSAG024182
NONHSAG055664
NONHSAG055665
NONHSAG055296
NONHSAG034507
NONHSAG051934
NONHSAG055666
NONHSAG055256
NONHSAG049770
NONHSAG041120
NONHSAG049320
NONHSAG051977
NONHSAG003479
NONHSAG041121
NONHSAG051978
NONHSAG041122
NONHSAG049773
NONHSAG051528
NONHSAG028698
NONHSAG010831
NONHSAG014193
NONHSAG049325
NONHSAG049326
NONHSAG045227
NONHSAG039700
NONHSAG049737
NONHSAG039701
NONHSAG039332
NONHSAG041169
NONHSAG041128
NONHSAG031953
NONHSAG004571
NONHSAG014116
NONHSAG004120
NONHSAG052251
NONHSAG000431
NONHSAG014937
NONHSAG052210
NONHSAG008672
NONHSAG018218
NONHSAG031546
NONHSAG035646
NONHSAG031956
NONHSAG031136
NONHSAG029382
NONHSAG039706
NONHSAG021510
NONHSAG039378
NONHSAG031957
NONHSAG004575
NONHSAG039789
NONHSAG031179
NONHSAG052665
NONHSAG004986
NONHSAG052666
NONHSAG021553
NONHSAG042260
NONHSAG052297
NONHSAG042220
NONHSAG021554
NONHSAG000848
NONHSAG025286
NONHSAG011191
NONHSAG021147
NONHSAG046775
NONHSAG032271
NONHSAG046736
NONHSAG036741
NONHSAG032600
NONHSAG036373
NONHSAG005260
NONHSAG036374
NONHSAG036333
NONHSAG015626
NONHSAG005262
NONHSAG001982
NONHSAG036703
NONHSAG001533
NONHSAG005633
NONHSAG026751
NONHSAG032606
NONHSAG001124
NONHSAG001903
NONHSAG036378
NONHSAG036706
NONHSAG005224
NONHSAG009325
NONHSAG001905
NONHSAG001947
NONHSAG043320
NONHSAG001948
NONHSAG053399
NONHSAG053728
NONHSAG047054
NONHSAG043367
NONHSAG047426
NONHSAG037061
NONHSAG012665
NONHSAG016355
NONHSAG047058
NONHSAG037021
NONHSAG037064
NONHSAG016316
NONHSAG016358
NONHSAG054410
NONHSAG037844
NONHSAG037475
NONHSAG016359
NONHSAG050394
NONHSAG027071
NONHSAG050764
NONHSAG006365
NONHSAG033749
NONHSAG023343
NONHSAG040361
NONHSAG023344
NONHSAG027855
NONHSAG017080
NONHSAG040732
NONHSAG048153
NONHSAG027446
NONHSAG027856
NONHSAG017451
NONHSAG027406
NONHSAG023389
NONHSAG044424
NONHSAG027038
NONHSAG040325
NONHSAG017002
NONHSAG038570
NONHSAG044056
NONHSAG040735
NONHSAG027449
NONHSAG044836
NONHSAG038981
NONHSAG034841
NONHSAG038982
NONHSAG030700
NONHSAG013396
NONHSAG034842
NONHSAG044059
NONHSAG040738
NONHSAG003770
NONHSAG051860
NONHSAG017416
NONHSAG038124
NONHSAG034434
NONHSAG038904
NONHSAG007873
NONHSAG051083
NONHSAG034435
NONHSAG007054
NONHSAG028540
NONHSAG055595
NONHSAG034479
NONHSAG028952
NONHSAG020794
NONHSAG051087
NONHSAG007877
NONHSAG024033
NONHSAG003777
NONHSAG024075
NONHSAG003368
NONHSAG030709
NONHSAG028176
NONHSAG045193
NONHSAG024077
NONHSAG049212
NONHSAG051459
NONHSAG028136
NONHSAG028916
NONHSAG018141
NONHSAG041054
NONHSAG049213
NONHSAG014862
NONHSAG049214
NONHSAG014042
NONHSAG049665
NONHSAG018552
NONHSAG014002
NONHSAG028549
NONHSAG039260
NONHSAG014412
NONHSAG018144
NONHSAG041467
NONHSAG039220
NONHSAG045527
NONHSAG018104
NONHSAG035532
NONHSAG031473
NONHSAG014006
NONHSAG035984
NONHSAG052551
NONHSAG008972
NONHSAG031435
NONHSAG004422
NONHSAG029270
NONHSAG031066
NONHSAG025990
NONHSAG025950
NONHSAG035537
NONHSAG039228
NONHSAG021893
NONHSAG035538
NONHSAG025953
NONHSAG029274
NONHSAG052188
NONHSAG025954
NONHSAG042192
NONHSAG052107
NONHSAG000739
NONHSAG021446
NONHSAG019281
NONHSAG042973
NONHSAG052108
NONHSAG019240
NONHSAG042933
NONHSAG029278
NONHSAG019651
NONHSAG011861
NONHSAG019652
NONHSAG042156
NONHSAG042116
NONHSAG019203
NONHSAG042199
NONHSAG032121
NONHSAG019614
NONHSAG019615
NONHSAG042979
NONHSAG019246
NONHSAG019616
NONHSAG015516
NONHSAG009211
NONHSAG053610
NONHSAG036634
NONHSAG036675
NONHSAG009212
NONHSAG001832
NONHSAG005153
NONHSAG015559
NONHSAG009213
NONHSAG036267
NONHSAG009296
NONHSAG022131
NONHSAG032537
NONHSAG001097
NONHSAG005197
NONHSAG036228
NONHSAG036679
NONHSAG053287
NONHSAG053656
NONHSAG005527
NONHSAG053288
NONHSAG053289
NONHSAG001059
NONHSAG047721
NONHSAG012960
NONHSAG043622
NONHSAG012592
NONHSAG016200
NONHSAG016242
NONHSAG043624
NONHSAG012143
NONHSAG012144
NONHSAG016695
NONHSAG012924
NONHSAG016245
NONHSAG047727
NONHSAG006660
NONHSAG002520
NONHSAG050693
NONHSAG016208
NONHSAG016249
NONHSAG006296
NONHSAG050203
NONHSAG006624
NONHSAG023600
NONHSAG048080
NONHSAG050286
NONHSAG023601
NONHSAG050287
NONHSAG033229
NONHSAG040660
NONHSAG048491
NONHSAG002567
NONHSAG002199
NONHSAG027785
NONHSAG050698
NONHSAG027375
NONHSAG006218
NONHSAG040293
NONHSAG040662
NONHSAG017381
NONHSAG048494
NONHSAG027746
NONHSAG013282
NONHSAG044724
NONHSAG023607
NONHSAG013201
NONHSAG017301
NONHSAG030671
NONHSAG038420
NONHSAG023609
NONHSAG013203
NONHSAG038830
NONHSAG017386
NONHSAG013696
NONHSAG038421
NONHSAG044768
NONHSAG040217
NONHSAG030631
NONHSAG048458
NONHSAG038831
NONHSAG051380
NONHSAG040218
NONHSAG038833
NONHSAG038054
NONHSAG038055
NONHSAG038834
NONHSAG051751
NONHSAG038096
NONHSAG028840
NONHSAG028841
NONHSAG038058
NONHSAG034369
NONHSAG038059
NONHSAG034738
NONHSAG051755
NONHSAG049960
NONHSAG041391
NONHSAG049182
NONHSAG028844
NONHSAG041351
NONHSAG028803
NONHSAG055858
NONHSAG049962
NONHSAG028025
NONHSAG010280
NONHSAG028435
NONHSAG051348
NONHSAG010281
NONHSAG041312
NONHSAG028805
NONHSAG028847
NONHSAG045413
NONHSAG010282
NONHSAG014342
NONHSAG018483
NONHSAG028069
NONHSAG028029
NONHSAG045497
NONHSAG010285
NONHSAG014344
NONHSAG045047
NONHSAG049599
NONHSAG014345
NONHSAG045048
NONHSAG031773
NONHSAG045008
NONHSAG049969
NONHSAG035463
NONHSAG000660
NONHSAG014346
NONHSAG049519
NONHSAG041729
NONHSAG010616
NONHSAG039113
NONHSAG014348
NONHSAG035424
NONHSAG029160
NONHSAG010659
NONHSAG000663
NONHSAG039115
NONHSAG008044
NONHSAG029161
NONHSAG029530
NONHSAG014309
NONHSAG029531
NONHSAG035879
NONHSAG052446
NONHSAG004398
NONHSAG029533
NONHSAG029124
NONHSAG025803
NONHSAG029985
NONHSAG029534
NONHSAG042861
NONHSAG000668
NONHSAG029125
NONHSAG029986
NONHSAG008828
NONHSAG029126
NONHSAG052859
NONHSAG029988
NONHSAG029168
NONHSAG029169
NONHSAG042865
NONHSAG032870
NONHSAG015074
NONHSAG019994
NONHSAG042006
NONHSAG019954
NONHSAG032092
NONHSAG015404
NONHSAG001760
NONHSAG036973
NONHSAG015078
NONHSAG005492
NONHSAG036564
NONHSAG019958
NONHSAG032056
NONHSAG005494
NONHSAG036525
NONHSAG019508
NONHSAG032015
NONHSAG053584
NONHSAG005044
NONHSAG005864
NONHSAG009964
NONHSAG005823
NONHSAG036117
NONHSAG032059
NONHSAG005046
NONHSAG009146
NONHSAG047651
NONHSAG043100
NONHSAG053137
NONHSAG047611
NONHSAG022886
NONHSAG043962
NONHSAG047653
NONHSAG043102
NONHSAG001729
NONHSAG005829
NONHSAG012400
NONHSAG016541
NONHSAG012810
NONHSAG012401
NONHSAG016543
NONHSAG047615
NONHSAG033970
NONHSAG033151
NONHSAG043148
NONHSAG033521
NONHSAG016587
NONHSAG033153
NONHSAG033113
NONHSAG006551
NONHSAG054600
NONHSAG012079
NONHSAG033155
NONHSAG016548
NONHSAG050953
NONHSAG006595
NONHSAG050912
NONHSAG050175
NONHSAG037258
NONHSAG054234
NONHSAG050176
NONHSAG027673
NONHSAG054686
NONHSAG023943
NONHSAG027634
NONHSAG040100
NONHSAG040592
NONHSAG023576
NONHSAG040101
NONHSAG027636
NONHSAG027637
NONHSAG017272
NONHSAG040144
NONHSAG013173
NONHSAG030190
NONHSAG027269
NONHSAG013543
NONHSAG040925
NONHSAG038351
NONHSAG013504
NONHSAG040108
NONHSAG038763
NONHSAG003551
NONHSAG034213
NONHSAG013588
NONHSAG003593
NONHSAG013917
NONHSAG013918
NONHSAG007654
NONHSAG030977
NONHSAG024630
NONHSAG007655
NONHSAG034668
NONHSAG003965
NONHSAG030117
NONHSAG028322
NONHSAG028773
NONHSAG007657
NONHSAG028364
NONHSAG024223
NONHSAG003106
NONHSAG003188
NONHSAG024224
NONHSAG003558
NONHSAG055707
NONHSAG041202
NONHSAG020987
NONHSAG028327
NONHSAG020578
NONHSAG010582
NONHSAG024228
NONHSAG041615
NONHSAG018784
NONHSAG039083
NONHSAG031293
NONHSAG041617
NONHSAG045389
NONHSAG000180
NONHSAG052780
NONHSAG018748
NONHSAG004693
NONHSAG004242
NONHSAG052742
NONHSAG039415
NONHSAG052701
NONHSAG004694
NONHSAG029871
NONHSAG052744
NONHSAG021631
NONHSAG004696
NONHSAG039049
NONHSAG039008
NONHSAG004206
NONHSAG000599
NONHSAG029014
NONHSAG046810
NONHSAG052708
NONHSAG052339
NONHSAG015331
NONHSAG019883
NONHSAG015373
NONHSAG015702
NONHSAG046898
NONHSAG032761
NONHSAG036821
NONHSAG009480
NONHSAG032394
NONHSAG036084
NONHSAG042308
NONHSAG032763
NONHSAG019478
NONHSAG019437
NONHSAG005301
NONHSAG009073
NONHSAG032355
NONHSAG015379
NONHSAG009443
NONHSAG009484
NONHSAG026092
NONHSAG032398
NONHSAG005713
NONHSAG009444
NONHSAG005344
NONHSAG001203
NONHSAG009486
NONHSAG036418
NONHSAG005348
NONHSAG009859
NONHSAG043033
NONHSAG053439
NONHSAG012782
NONHSAG016801
NONHSAG047136
NONHSAG037550
NONHSAG012784
NONHSAG047177
NONHSAG012785
NONHSAG037961
NONHSAG006070
NONHSAG006030
NONHSAG037184
NONHSAG033453
NONHSAG002791
NONHSAG033454
NONHSAG006852
NONHSAG012379
NONHSAG037514
NONHSAG012749
NONHSAG027192
NONHSAG002795
NONHSAG033089
NONHSAG054903
NONHSAG006814
NONHSAG050435
NONHSAG006815
NONHSAG050476
NONHSAG040071
NONHSAG027113
NONHSAG044540
NONHSAG023464
NONHSAG002389
NONHSAG002348
NONHSAG027196
NONHSAG023465
NONHSAG044992
NONHSAG044952
NONHSAG040483
NONHSAG040033
NONHSAG013840
NONHSAG044994
NONHSAG040403
NONHSAG044503
NONHSAG017572
NONHSAG023878
NONHSAG040076
NONHSAG013063
NONHSAG044996
NONHSAG040036
NONHSAG040897
NONHSAG017574
NONHSAG044588
NONHSAG034141
NONHSAG030000
NONHSAG044589
NONHSAG040449
NONHSAG013887
NONHSAG017987
NONHSAG034922
NONHSAG044139
NONHSAG034185
NONHSAG038613
NONHSAG017988
NONHSAG003400
NONHSAG051981
NONHSAG055261
NONHSAG017578
NONHSAG013029
NONHSAG003402
NONHSAG030497
NONHSAG024191
NONHSAG024970
NONHSAG034557
NONHSAG038698
NONHSAG038206
NONHSAG007954
NONHSAG024192
NONHSAG038699
NONHSAG024563
NONHSAG028294
NONHSAG051904
NONHSAG041990
NONHSAG007956
NONHSAG030419
NONHSAG020423
NONHSAG024195
NONHSAG020054
NONHSAG041951
NONHSAG051989
NONHSAG051169
NONHSAG014900
NONHSAG020879
NONHSAG020838
NONHSAG031960
NONHSAG014943
NONHSAG041137
NONHSAG041998
NONHSAG045237
NONHSAG014165
NONHSAG045279
NONHSAG014576
NONHSAG039301
NONHSAG039753
NONHSAG031963
NONHSAG014577
NONHSAG052671
NONHSAG039385
NONHSAG004542
NONHSAG000073
NONHSAG010479
NONHSAG014907
NONHSAG004501
NONHSAG008233
NONHSAG031105
NONHSAG018639
NONHSAG052222
NONHSAG004995
NONHSAG052674
NONHSAG008275
NONHSAG004954
NONHSAG025293
NONHSAG029722
NONHSAG031559
NONHSAG008646
NONHSAG000488
NONHSAG052636
NONHSAG031519
NONHSAG031929
NONHSAG008278
NONHSAG052227
NONHSAG025215
NONHSAG029725
NONHSAG004139
NONHSAG052228
NONHSAG019771
NONHSAG019321
NONHSAG019363
NONHSAG021159
NONHSAG042236
NONHSAG011534
NONHSAG042237
NONHSAG032692
NONHSAG015266
NONHSAG019366
NONHSAG042607
NONHSAG005681
NONHSAG015636
NONHSAG053320
NONHSAG001172
NONHSAG009331
NONHSAG011578
NONHSAG053361
NONHSAG005682
NONHSAG015637
NONHSAG032245
NONHSAG015679
NONHSAG032696
NONHSAG036715
NONHSAG026762
NONHSAG022622
NONHSAG022623
NONHSAG026764
NONHSAG001548
NONHSAG022624
NONHSAG047882
NONHSAG043782
NONHSAG053369
NONHSAG022215
NONHSAG026766
NONHSAG053739
NONHSAG047064
NONHSAG047884
NONHSAG026398
NONHSAG022668
NONHSAG016321
NONHSAG026769
NONHSAG033340
NONHSAG033750
NONHSAG047887
NONHSAG016324
NONHSAG047889
NONHSAG016325
NONHSAG033753
NONHSAG054091
NONHSAG047029
NONHSAG002230
NONHSAG054092
NONHSAG037445
NONHSAG054831
NONHSAG023350
NONHSAG027451
NONHSAG002276
NONHSAG027862
NONHSAG006376
NONHSAG006786
NONHSAG054015
NONHSAG050776
NONHSAG023763
NONHSAG023353
NONHSAG054835
NONHSAG044471
NONHSAG054468
NONHSAG048572
NONHSAG044472
NONHSAG023725
NONHSAG040701
NONHSAG027088
NONHSAG027457
NONHSAG013771
NONHSAG027827
NONHSAG017052
NONHSAG013731
NONHSAG038170
NONHSAG027828
NONHSAG040335
NONHSAG048945
NONHSAG044066
NONHSAG044476
NONHSAG048536
NONHSAG034481
NONHSAG030750
NONHSAG023319
NONHSAG040336
NONHSAG013734
NONHSAG048578
NONHSAG034852
NONHSAG013776
NONHSAG007880
NONHSAG013736
NONHSAG051460
NONHSAG007021
NONHSAG034034
NONHSAG038954
NONHSAG055110
NONHSAG038955
NONHSAG003332
NONHSAG034855
NONHSAG007883
NONHSAG051462
NONHSAG013329
NONHSAG038915
NONHSAG051053
NONHSAG051463
NONHSAG003785
NONHSAG038916
NONHSAG024000
NONHSAG007844
NONHSAG028552
NONHSAG051097
NONHSAG007026
NONHSAG038508
NONHSAG051056
NONHSAG038918
NONHSAG038139
NONHSAG028553
NONHSAG028554
NONHSAG020314
NONHSAG028596
NONHSAG041063
NONHSAG020397
NONHSAG020357
NONHSAG049265
NONHSAG018152
NONHSAG020317
NONHSAG018563
NONHSAG014833
NONHSAG028519
NONHSAG024009
NONHSAG010775
NONHSAG035582
NONHSAG035541
NONHSAG014056
NONHSAG031483
NONHSAG041438
NONHSAG014015
NONHSAG031854
NONHSAG052192
NONHSAG039275
NONHSAG008122
NONHSAG039686
NONHSAG052193
NONHSAG039646
NONHSAG035997
NONHSAG052195
NONHSAG008903
NONHSAG031858
NONHSAG021452
NONHSAG052934
NONHSAG039279
NONHSAG008577
NONHSAG042980
NONHSAG029284
NONHSAG039649
NONHSAG025553
NONHSAG025964
NONHSAG035509
NONHSAG008169
NONHSAG042901
NONHSAG042983
NONHSAG042163
NONHSAG029697
NONHSAG042533
NONHSAG011871
NONHSAG015520
NONHSAG019210
NONHSAG042985
NONHSAG029658
NONHSAG019211
NONHSAG019622
NONHSAG015194
NONHSAG019294
NONHSAG036680
NONHSAG042125
NONHSAG011832
NONHSAG019295
NONHSAG042168
NONHSAG019296
NONHSAG042127
NONHSAG011876
NONHSAG011466
NONHSAG019626
NONHSAG042539
NONHSAG009671
NONHSAG005162
NONHSAG011878
NONHSAG005941
NONHSAG019217
NONHSAG005573
NONHSAG019218
NONHSAG009633
NONHSAG001433
NONHSAG032505
NONHSAG019219
NONHSAG036688
NONHSAG053664
NONHSAG022961
NONHSAG001844
NONHSAG001475
NONHSAG005985
NONHSAG053254
NONHSAG032548
NONHSAG009225
NONHSAG026611
NONHSAG001845
NONHSAG036608
NONHSAG001806
NONHSAG032919
NONHSAG001889
NONHSAG026204
NONHSAG022925
NONHSAG012971
NONHSAG012193
NONHSAG012195
NONHSAG026619
NONHSAG033230
NONHSAG012196
NONHSAG037700
NONHSAG012935
NONHSAG047779
NONHSAG002571
NONHSAG033602
NONHSAG037702
NONHSAG047329
NONHSAG012199
NONHSAG033275
NONHSAG002162
NONHSAG006631
NONHSAG050293
NONHSAG050662
NONHSAG050294
NONHSAG023281
NONHSAG050295
NONHSAG027751
NONHSAG002944
NONHSAG037748
NONHSAG023611
NONHSAG037379
NONHSAG050255
NONHSAG050214
NONHSAG050667
NONHSAG048092
NONHSAG037709
NONHSAG027386
NONHSAG023245
NONHSAG002538
NONHSAG048462
NONHSAG023246
NONHSAG044322
NONHSAG044732
NONHSAG013291
NONHSAG048832
NONHSAG048013
NONHSAG027389
NONHSAG027307
NONHSAG048097
NONHSAG013622
NONHSAG044735
NONHSAG013254
NONHSAG030640
NONHSAG013255
NONHSAG030641
NONHSAG013296
NONHSAG034331
NONHSAG034332
NONHSAG038432
NONHSAG034701
NONHSAG044369
NONHSAG044329
NONHSAG034333
NONHSAG017357
NONHSAG034334
NONHSAG013258
NONHSAG028890
NONHSAG024380
NONHSAG013259
NONHSAG028070
NONHSAG013219
NONHSAG024792
NONHSAG038068
NONHSAG038888
NONHSAG051354
NONHSAG038028
NONHSAG051355
NONHSAG041360
NONHSAG030608
NONHSAG034708
NONHSAG041361
NONHSAG028403
NONHSAG034709
NONHSAG045461
NONHSAG055457
NONHSAG049192
NONHSAG018490
NONHSAG041362
NONHSAG024756
NONHSAG028856
NONHSAG014350
NONHSAG024305
NONHSAG018040
NONHSAG014391
NONHSAG049932
NONHSAG028857
NONHSAG014351
NONHSAG018041
NONHSAG024388
NONHSAG041365
NONHSAG028858
NONHSAG039570
NONHSAG031780
NONHSAG014722
NONHSAG010663
NONHSAG045467
NONHSAG014723
NONHSAG008090
NONHSAG041368
NONHSAG039941
NONHSAG049568
NONHSAG014314
NONHSAG049527
NONHSAG018045
NONHSAG049528
NONHSAG039942
NONHSAG049979
NONHSAG049118
NONHSAG041328
NONHSAG035884
NONHSAG035474
NONHSAG041329
NONHSAG014726
NONHSAG021380
NONHSAG004774
NONHSAG029540
NONHSAG039167
NONHSAG025481
NONHSAG039536
NONHSAG029910
NONHSAG039988
NONHSAG008015
NONHSAG031338
NONHSAG039579
NONHSAG029993
NONHSAG025442
NONHSAG039989
NONHSAG052004
NONHSAG035439
NONHSAG008016
NONHSAG004367
NONHSAG004736
NONHSAG029912
NONHSAG042420
NONHSAG008879
NONHSAG000228
NONHSAG052499
NONHSAG004369
NONHSAG011760
NONHSAG042873
NONHSAG042053
NONHSAG052828
NONHSAG029505
NONHSAG021756
NONHSAG042874
NONHSAG025857
NONHSAG025407
NONHSAG021717
NONHSAG046525
NONHSAG032060
NONHSAG015494
NONHSAG025818
NONHSAG042878
NONHSAG032472
NONHSAG042058
NONHSAG015005
NONHSAG015866
NONHSAG046938
NONHSAG005420
NONHSAG001730
NONHSAG011727
NONHSAG019517
NONHSAG019599
NONHSAG009152
NONHSAG005052
NONHSAG036986
NONHSAG036126
NONHSAG026950
NONHSAG032436
NONHSAG019109
NONHSAG005054
NONHSAG005014
NONHSAG036947
NONHSAG032027
NONHSAG026542
NONHSAG047250
NONHSAG022074
NONHSAG026912
NONHSAG026954
NONHSAG009568
NONHSAG005427
NONHSAG026955
NONHSAG047662
NONHSAG001738
NONHSAG022897
NONHSAG009119
NONHSAG026546
NONHSAG026137
NONHSAG026916
NONHSAG043195
NONHSAG043975
NONHSAG043116
NONHSAG026919
NONHSAG016965
NONHSAG043117
NONHSAG050181
NONHSAG050141
NONHSAG054241
NONHSAG033535
NONHSAG050921
NONHSAG016559
NONHSAG012418
NONHSAG033536
NONHSAG027640
NONHSAG050594
NONHSAG050922
NONHSAG054203
NONHSAG023582
NONHSAG037268
NONHSAG002424
NONHSAG002467
NONHSAG054205
NONHSAG040560
NONHSAG040150
NONHSAG027602
NONHSAG050557
NONHSAG048720
NONHSAG027603
NONHSAG050598
NONHSAG054248
NONHSAG040111
NONHSAG040932
NONHSAG050559
NONHSAG023505
NONHSAG023956
NONHSAG040934
NONHSAG023507
NONHSAG040935
NONHSAG013143
NONHSAG048725
NONHSAG040936
NONHSAG013923
NONHSAG013924
NONHSAG040569
NONHSAG013188
NONHSAG013926
NONHSAG003152
NONHSAG034224
NONHSAG017289
NONHSAG038735
NONHSAG034635
NONHSAG030905
NONHSAG013929
NONHSAG030167
NONHSAG007295
NONHSAG028330
NONHSAG020172
NONHSAG030127
NONHSAG007625
NONHSAG051206
NONHSAG049410
NONHSAG049821
NONHSAG049493
NONHSAG051249
NONHSAG007219
NONHSAG041254
NONHSAG010593
NONHSAG028789
NONHSAG014611
NONHSAG014283
NONHSAG010963
NONHSAG049415
NONHSAG049416
NONHSAG010144
NONHSAG039461
NONHSAG014285
NONHSAG041298
NONHSAG039052
NONHSAG039462
NONHSAG010186
NONHSAG045359
NONHSAG041259
NONHSAG035323
NONHSAG010598
NONHSAG000192
NONHSAG004210
NONHSAG010599
NONHSAG010148
NONHSAG029470
NONHSAG000194
NONHSAG014209
NONHSAG029062
NONHSAG031269
NONHSAG029433
NONHSAG046820
NONHSAG004299
NONHSAG000569
NONHSAG015380
NONHSAG029026
NONHSAG021647
NONHSAG019441
NONHSAG011282
NONHSAG015711
NONHSAG015342
NONHSAG011694
NONHSAG036050
NONHSAG032361
NONHSAG032362
NONHSAG011696
NONHSAG005350
NONHSAG001291
NONHSAG042769
NONHSAG011698
NONHSAG032365
NONHSAG011699
NONHSAG053400
NONHSAG032734
NONHSAG005312
NONHSAG015718
NONHSAG005354
NONHSAG026471
NONHSAG022701
NONHSAG047590
NONHSAG032779
NONHSAG043080
NONHSAG053076
NONHSAG047591
NONHSAG047550
NONHSAG047141
NONHSAG005728
NONHSAG047553
NONHSAG012710
NONHSAG016810
NONHSAG047554
NONHSAG022707
NONHSAG043865
NONHSAG016073
NONHSAG047556
NONHSAG012753
NONHSAG037150
NONHSAG043867
NONHSAG012386
NONHSAG033872
NONHSAG047559
NONHSAG012387
NONHSAG006820
NONHSAG012716
NONHSAG054950
NONHSAG006041
NONHSAG054953
NONHSAG054913
NONHSAG027982
NONHSAG050444
NONHSAG037527
NONHSAG054176
NONHSAG037528
NONHSAG048690
NONHSAG006497
NONHSAG023432
NONHSAG023023
NONHSAG050487
NONHSAG044591
NONHSAG044140
NONHSAG044510
NONHSAG048610
NONHSAG023434
NONHSAG023475
NONHSAG040451
NONHSAG044511
NONHSAG044962
NONHSAG040863
NONHSAG023805
NONHSAG050449
NONHSAG044184
NONHSAG044963
NONHSAG013030
NONHSAG040085
NONHSAG017131
NONHSAG040823
NONHSAG023438
NONHSAG044555
NONHSAG040004
NONHSAG017994
NONHSAG040046
NONHSAG017995
NONHSAG040498
NONHSAG030010
NONHSAG030421
NONHSAG040417
NONHSAG034193
NONHSAG017955
NONHSAG048249
NONHSAG044108
NONHSAG038295
NONHSAG040009
NONHSAG034523
NONHSAG003411
NONHSAG030014
NONHSAG013899
NONHSAG007101
NONHSAG020060
NONHSAG003453
NONHSAG013039
NONHSAG017508
NONHSAG024120
NONHSAG024162
NONHSAG038299
NONHSAG030427
NONHSAG028631
NONHSAG055277
NONHSAG003457
NONHSAG049381
NONHSAG055606
NONHSAG024125
NONHSAG041183
NONHSAG018640
NONHSAG014130
NONHSAG020026
NONHSAG049794
NONHSAG010441
NONHSAG014131
NONHSAG028269
NONHSAG045287
NONHSAG049387
NONHSAG010074
NONHSAG041146
NONHSAG041556
NONHSAG041105
NONHSAG045247
NONHSAG031971
NONHSAG010486
NONHSAG039311
NONHSAG035663
NONHSAG052680
NONHSAG014505
NONHSAG039312
NONHSAG000860
NONHSAG018236
NONHSAG052230
NONHSAG008200
NONHSAG049309
NONHSAG039313
NONHSAG031564
NONHSAG014589
NONHSAG018238
NONHSAG018649
NONHSAG004512
NONHSAG000412
NONHSAG039766
NONHSAG004554
NONHSAG000413
NONHSAG039316
NONHSAG039767
NONHSAG008285
NONHSAG035668
NONHSAG029321
NONHSAG052644
NONHSAG039768
NONHSAG052604
NONHSAG021532
NONHSAG004188
NONHSAG008698
NONHSAG008288
NONHSAG046751
NONHSAG021904
NONHSAG052689
NONHSAG021577
NONHSAG052239
NONHSAG052649
NONHSAG042654
NONHSAG036350
NONHSAG011912
NONHSAG029739
NONHSAG011543
NONHSAG032292
NONHSAG011585
NONHSAG015645
NONHSAG036352
NONHSAG036722
NONHSAG005650
NONHSAG015605
NONHSAG019377
NONHSAG015646
NONHSAG005282
NONHSAG011548
NONHSAG009793
NONHSAG011507
NONHSAG036314
NONHSAG011139
NONHSAG026771
NONHSAG036729
NONHSAG009306
NONHSAG047892
NONHSAG005617
NONHSAG047031
NONHSAG005618
NONHSAG005209
NONHSAG026326
NONHSAG047484
NONHSAG022268
NONHSAG047814
NONHSAG012683
NONHSAG016333
NONHSAG037041
NONHSAG002240
NONHSAG054880
NONHSAG047859
NONHSAG033353
NONHSAG006382
NONHSAG016378
NONHSAG054061
NONHSAG016338
NONHSAG033766
NONHSAG037005
NONHSAG002243
NONHSAG002285
NONHSAG027010
NONHSAG037416
NONHSAG050744
NONHSAG006345
NONHSAG033358
NONHSAG002656
NONHSAG037828
NONHSAG006716
NONHSAG044441
NONHSAG023365
NONHSAG048910
NONHSAG054068
NONHSAG044810
NONHSAG044893
NONHSAG048542
NONHSAG048911
NONHSAG050338
NONHSAG040794
NONHSAG044033
NONHSAG027016
NONHSAG048502
NONHSAG027468
NONHSAG048544
NONHSAG023368
NONHSAG044034
NONHSAG048545
NONHSAG040796
NONHSAG044035
NONHSAG040386
NONHSAG048914
NONHSAG044447
NONHSAG017065
NONHSAG017885
NONHSAG030311
NONHSAG044899
NONHSAG040717
NONHSAG034083
NONHSAG038922
NONHSAG040718
NONHSAG007850
NONHSAG055120
NONHSAG003792
NONHSAG055530
NONHSAG003301
NONHSAG017069
NONHSAG051062
NONHSAG024090
NONHSAG007852
NONHSAG030315
NONHSAG051884
NONHSAG034498
NONHSAG038926
NONHSAG055164
NONHSAG038107
NONHSAG051065
NONHSAG028153
NONHSAG007446
NONHSAG003715
NONHSAG051435
NONHSAG024463
NONHSAG024013
NONHSAG003757
NONHSAG041071
NONHSAG051026
NONHSAG003798
NONHSAG007857
NONHSAG020323
NONHSAG055905
NONHSAG045172
NONHSAG028114
NONHSAG055906
NONHSAG007489
NONHSAG003759
NONHSAG028115
NONHSAG045502
NONHSAG018120
NONHSAG028527
NONHSAG045503
NONHSAG024428
NONHSAG010742
NONHSAG045505
NONHSAG039691
NONHSAG031450
NONHSAG035551
NONHSAG045506
NONHSAG039693
NONHSAG014804
NONHSAG031494
NONHSAG000381
NONHSAG039694
NONHSAG014805
NONHSAG052940
NONHSAG010788
NONHSAG004851
NONHSAG052571
NONHSAG039204
NONHSAG008911
NONHSAG035514
NONHSAG052900
NONHSAG052572
NONHSAG018128
NONHSAG004484
NONHSAG008912
NONHSAG052901
NONHSAG029251
NONHSAG000304
NONHSAG052903
NONHSAG008997
NONHSAG031828
NONHSAG052904
NONHSAG042990
NONHSAG039209
NONHSAG052946
NONHSAG025523
NONHSAG000716
NONHSAG021013
NONHSAG008548
NONHSAG004448
NONHSAG008138
NONHSAG004449
NONHSAG052907
NONHSAG046233
NONHSAG019261
NONHSAG015161
NONHSAG004819
NONHSAG019221
NONHSAG011800
NONHSAG011473
NONHSAG032590
NONHSAG032960
NONHSAG032961
NONHSAG011844
NONHSAG042588
NONHSAG011885
NONHSAG015944
NONHSAG042998
NONHSAG036652
NONHSAG019225
NONHSAG032593
NONHSAG036611
NONHSAG015577
NONHSAG005541
NONHSAG019227
NONHSAG015947
NONHSAG001442
NONHSAG019269
NONHSAG015128
NONHSAG001073
NONHSAG011849
NONHSAG022970
NONHSAG032597
NONHSAG026292
NONHSAG009685
NONHSAG032516
NONHSAG022931
NONHSAG032969
NONHSAG032928
NONHSAG026622
NONHSAG005956
NONHSAG005957
NONHSAG005588
NONHSAG022524
NONHSAG047702
NONHSAG005509
NONHSAG022117
NONHSAG047704
NONHSAG047705
NONHSAG012533
NONHSAG016223
NONHSAG012985
NONHSAG033201
NONHSAG012576
NONHSAG012945
NONHSAG043239
NONHSAG006271
NONHSAG037713
NONHSAG043609
NONHSAG012128
NONHSAG012989
NONHSAG037714
NONHSAG027391
NONHSAG054322
NONHSAG037346
NONHSAG037757
NONHSAG006686
NONHSAG002504
NONHSAG002586
NONHSAG037759
NONHSAG023253
NONHSAG037719
NONHSAG054326
NONHSAG044330
NONHSAG054368
NONHSAG027397
NONHSAG050638
NONHSAG044784
NONHSAG013672
NONHSAG013631
NONHSAG034380
NONHSAG013223
NONHSAG013633
NONHSAG017775
NONHSAG038032
NONHSAG034753
NONHSAG017737
NONHSAG038444
NONHSAG038035
NONHSAG013679
NONHSAG028860
NONHSAG038037
NONHSAG055464
NONHSAG020252
NONHSAG030617
NONHSAG003604
NONHSAG003646
NONHSAG028822
NONHSAG045470
NONHSAG020212
NONHSAG038859
NONHSAG051367
NONHSAG024723
NONHSAG007706
NONHSAG049571
NONHSAG028864
NONHSAG003606
NONHSAG045472
NONHSAG028865
NONHSAG010260
NONHSAG049984
NONHSAG041334
NONHSAG031380
NONHSAG045476
NONHSAG024728
NONHSAG020218
NONHSAG045067
NONHSAG014324
NONHSAG014735
NONHSAG031301
NONHSAG049128
NONHSAG035484
NONHSAG004781
NONHSAG004371
NONHSAG039584
NONHSAG018016
NONHSAG018878
NONHSAG004782
NONHSAG035485
NONHSAG000600
NONHSAG035444
NONHSAG004373
NONHSAG008022
NONHSAG039588
NONHSAG008435
NONHSAG039959
NONHSAG025003
NONHSAG042881
NONHSAG039509
NONHSAG052427
NONHSAG019190
NONHSAG000238
NONHSAG052058
NONHSAG052878
NONHSAG008889
NONHSAG015050
NONHSAG042063
NONHSAG042023
NONHSAG015051
NONHSAG029599
NONHSAG029107
NONHSAG025007
NONHSAG046985
NONHSAG036990
NONHSAG032480
NONHSAG046904
NONHSAG032890
NONHSAG011774
NONHSAG011323
NONHSAG042887
NONHSAG021319
NONHSAG011775
NONHSAG042888
NONHSAG015055
NONHSAG032851
NONHSAG046988
NONHSAG053190
NONHSAG042848
NONHSAG032402
NONHSAG005471
NONHSAG053151
NONHSAG001741
NONHSAG046909
NONHSAG026590
NONHSAG032814
NONHSAG053153
NONHSAG001374
NONHSAG032488
NONHSAG053154
NONHSAG022861
NONHSAG026921
NONHSAG036179
NONHSAG036958
NONHSAG043980
NONHSAG032408
NONHSAG032039
NONHSAG026143
NONHSAG032409
NONHSAG043120
NONHSAG043982
NONHSAG053199
NONHSAG026145
NONHSAG005479
NONHSAG022088
NONHSAG005809
NONHSAG026967
NONHSAG022417
NONHSAG016112
NONHSAG037640
NONHSAG033171
NONHSAG043126
NONHSAG016154
NONHSAG047678
NONHSAG012875
NONHSAG033951
NONHSAG033501
NONHSAG033173
NONHSAG012876
NONHSAG012467
NONHSAG016198
NONHSAG016116
NONHSAG043949
NONHSAG037684
NONHSAG047639
NONHSAG043909
NONHSAG012879
NONHSAG050932
NONHSAG006902
NONHSAG054663
NONHSAG012019
NONHSAG050195
NONHSAG037688
NONHSAG006904
NONHSAG033179
NONHSAG050156
NONHSAG023144
NONHSAG050567
NONHSAG006127
NONHSAG002068
NONHSAG044631
NONHSAG050568
[truncated: 660 more rows]
