# Supplementary material for: Single-cell profiling of lncRNAs in human germ cells and molecular analysis reveals transcriptional regulation of LNC1845 on LHX8
Source: eLife. 2023 Jan 5;12:e78421. doi: 10.7554/eLife.78421 (PMC9859043; doi:10.7554/eLife.78421)
Supplement: Supplementary file 4. [file elife-78421-supp4.xlsx]

## Sheet: coding_genes
gene_id	p_val	avg_logFC	pct.1	pct.2	p_val_adj	cluster
GABRA3	5.93898e-60	1.81179	0.546	0.05	3.40565e-55	2
CLEC4D	6.27846e-59	1.797	0.773	0.145	3.60032e-54	2
CXCL14	4.06956e-52	1.83924	0.815	0.202	2.33365e-47	2
GSTM1	2.2716e-94	0.828908	0.672	0.035	1.30263e-89	2
KLRG2	1.24868e-46	1.21599	0.866	0.234	7.16045e-42	2
MT1G	8.57646e-29	1.65688	0.646	0.246	4.91808e-24	1
PHLDA2	3.14772e-28	1.36591	0.735	0.324	1.80503e-23	1
GDPD2	2.3116e-42	1.26472	0.891	0.358	1.32556e-37	1
PYY	2.49529e-42	1.5405	0.973	0.556	1.4309e-37	1
PSORS1C2	6.22568e-32	1.38833	0.789	0.341	3.57005e-27	1
GIP	2.22178e-18	1.64843	0.872	0.536	1.27406e-13	7
NODAL	0.000121155	1.62577	0.302	0.171	1	7
WNT3	1.57804e-08	1.45888	0.593	0.35	0.000904909	7
PPM1H	5.06384e-07	1.35865	0.547	0.351	0.0290381	7
RSU1	1.00702e-16	1.21306	0.977	0.791	5.77467e-12	7
STRA8	7.08747e-98	4.20852	0.927	0.119	4.06424e-93	5
THRA1/BTR	2.00786e-102	4.14336	0.969	0.132	1.15139e-97	5
TXLNB	5.13135e-78	3.68166	0.812	0.109	2.94252e-73	5
CYP26A1	1.40875e-101	3.59866	0.927	0.105	8.07835e-97	5
ZGLP1	3.6383e-72	3.56805	1	0.316	2.08634e-67	5
SYCP1	5.68973e-89	5.5241	0.939	0.189	3.26272e-84	3
SPO11	3.65237e-87	5.03602	0.912	0.175	2.09441e-82	3
SYCE2	1.15389e-55	3.71787	0.833	0.203	6.61686e-51	3
PRDM9	2.82527e-87	3.62482	0.693	0.055	1.62012e-82	3
SYCE3	9.53006e-66	3.59395	0.921	0.28	5.46492e-61	3
ZP3	4.05791e-37	5.47374	1	0.268	2.32697e-32	8
GDF9	2.3031e-51	4.77478	0.946	0.129	1.32069e-46	8
OOSP2	1.77497e-82	4.57697	0.784	0.033	1.01784e-77	8
FOLR1	2.99794e-33	4.73063	0.703	0.096	1.71914e-28	8
NLRP5	1.15433e-51	5.11819	0.973	0.141	6.61942e-47	8
TFCP2L1	7.24318e-39	1.63614	1	0.58	4.15353e-34	3
PPP1R14C	2.16483e-37	1.49286	0.851	0.289	1.2414e-32	3
MBP	8.26027e-24	1.44173	0.703	0.259	4.73677e-19	3
CDX1	1.17367e-32	1.42374	0.871	0.325	6.7303e-28	3
ATP2A3	4.18838e-30	1.36947	0.782	0.277	2.40179e-25	3
ALDH1A1	5.15102e-110	2.50086	0.938	0.179	2.9538e-105	0
KITLG	1.45193e-106	2.27912	0.875	0.133	8.32592e-102	0
WT1	9.24375e-98	2.03633	0.964	0.232	5.30074e-93	0
AMHR2	3.57769e-95	2.42096	0.943	0.249	2.05159e-90	0
LHX9	1.83956e-83	1.39885	0.745	0.095	1.05488e-78	0
SOX11	1.17472e-28	1.76668	0.598	0.147	6.73633e-24	6
ZFP36L1	2.73053e-34	1.7006	0.978	0.577	1.56579e-29	6
BST2	2.17274e-26	1.73777	0.859	0.41	1.24593e-21	6
NR2F2	2.01607e-16	2.54304	0.62	0.312	1.1561e-11	6
TCEAL2	1.03276e-14	1.51129	0.62	0.277	5.92228e-10	6

## Sheet: lncRNA
id	p_val	avg_logFC	pct.1	pct.2	p_val_adj	cluster
NONHSAG037843	5.12293e-53	1.83703	0.966	0.35	2.93769e-48	2
NONHSAG007424	4.84735e-49	2.69011	0.782	0.21	2.77967e-44	2
NONHSAG014728	4.52249e-42	1.01762	0.941	0.345	2.59338e-37	2
NONHSAG026474	3.55707e-42	1.05089	0.605	0.111	2.03976e-37	2
NONHSAG013598	1.99285e-40	0.965861	0.689	0.155	1.14278e-35	2
NONHSAG010808	7.34339e-23	1.31559	0.463	0.135	4.21099e-18	0
NONHSAG015923	8.57616e-35	1.11792	1	0.781	4.91791e-30	0
NONHSAG024871	2.51895e-15	0.999092	0.299	0.078	1.44447e-10	0
NONHSAG021060	1.61453e-22	0.961114	0.463	0.133	9.25839e-18	0
NONHSAG047919	6.68869e-25	0.887331	0.687	0.264	3.83556e-20	0
NONHSAG055132	5.4057e-05	1.57643	0.337	0.193	1	6
NONHSAG010803	0.00436987	1.39533	0.36	0.251	1	6
NONHSAG004919	1.74855e-14	1.18609	0.884	0.618	1.00269e-09	6
NONHSAG015927	4.16927e-07	1.1528	0.663	0.478	0.0239083	6
NONHSAG055129	1.81207e-07	1.08132	0.535	0.308	0.0103911	6
NONHSAG022073	1.15422e-106	4.11938	0.958	0.115	6.61873e-102	4
NONHSAG025643	3.32759e-77	2.47779	0.573	0.03	1.90817e-72	4
NONHSAG005594	3.37961e-62	1.6815	0.406	0.014	1.938e-57	4
NONHSAG021160	3.77807e-47	1.11719	0.49	0.046	2.1665e-42	4
NONHSAG001010	5.13809e-44	2.01699	0.573	0.083	2.94638e-39	4
NONHSAG029651	3.45253e-67	3.46579	0.632	0.067	1.97982e-62	3
NONHSAG019244	1.77757e-44	3.29671	0.658	0.137	1.01933e-39	3
NONHSAG000658	3.87695e-36	2.51724	0.474	0.078	2.2232e-31	3
NONHSAG016197	8.50191e-34	2.47654	0.614	0.151	4.87534e-29	3
NONHSAG048696	6.24655e-68	2.41127	0.535	0.037	3.58202e-63	3
NONHSAG028272	1.21394e-164	2.13339	0.919	0.007	6.96122e-160	7
NONHSAG003457	4.7029e-136	4.09074	0.919	0.017	2.69683e-131	7
NONHSAG006824	5.72449e-135	2.85539	0.703	0.003	3.28265e-130	7
NONHSAG010148	2.44847e-129	3.3654	0.892	0.017	1.40405e-124	7
NONHSAG014759	5.42899e-123	2.47819	0.649	0.003	3.1132e-118	7
NONHSAG053901	1.5502e-33	1.90355	0.99	0.779	8.88945e-29	8
NONHSAG053996	4.88384e-36	1.58388	0.911	0.383	2.80059e-31	8
NONHSAG013604	2.80028e-26	1.42174	0.842	0.383	1.60579e-21	8
NONHSAG015931	1.03771e-31	1.42148	0.96	0.513	5.95066e-27	8
NONHSAG055127	9.50056e-28	1.37723	0.802	0.288	5.448e-23	8
NONHSAG007246	3.31855e-97	2.4928	0.88	0.177	1.90299e-92	1
NONHSAG014508	7.14144e-84	2.90362	0.661	0.072	4.09519e-79	1
NONHSAG029913	5.39214e-75	1.9817	0.76	0.14	3.09207e-70	1
NONHSAG023511	4.34237e-69	2.37973	0.646	0.1	2.49009e-64	1
NONHSAG006969	1.47369e-68	1.84268	0.589	0.069	8.45075e-64	1
NONHSAG048074	8.99564e-17	2.02859	0.413	0.11	5.15846e-12	5
NONHSAG007409	1.17086e-13	1.47031	0.739	0.501	6.71419e-09	5
NONHSAG033469	3.82996e-08	0.773856	0.413	0.182	0.00219625	5
NONHSAG007246	6.99272e-07	0.996289	0.533	0.291	0.040099	5
NONHSAG032423	9.66786e-08	1.36221	0.326	0.136	0.00554394	5
