# Supplementary material for: Single-cell profiling of lncRNAs in human germ cells and molecular analysis reveals transcriptional regulation of LNC1845 on LHX8
Source: eLife. 2023 Jan 5;12:e78421. doi: 10.7554/eLife.78421 (PMC9859043; doi:10.7554/eLife.78421)
Supplement: Supplementary file 5. [file elife-78421-supp5.xlsx]

## Sheet: fGC_Mitotic
ID	Gene	Type	Corr
NONHSAG001561	TMEM61	SD	NA
NONHSAG002037	LRRC8D	SD	1
NONHSAG004448	LBR	SD	1
NONHSAG010756	REP15	SD	1
NONHSAG015323	GALNT16	SD	NA
NONHSAG016086	GPR132	SD	NA
NONHSAG017902	FES	SD	-0.438735
NONHSAG019714	CBFB	SD	-1
NONHSAG020005	AC009163.4	SD	1
NONHSAG020005	TMEM170A	SD	1
NONHSAG020623	ZNF232	SD	0.189007
NONHSAG020952	UBB	SD	-1
NONHSAG022701	CD300LB	SD	NA
NONHSAG022776	SAP30BP	SD	-1
NONHSAG024300	POLRMT	SD	-0.997716
NONHSAG026360	ETFB	SD	0.829833
NONHSAG026427	ZNF28	SD	-1
NONHSAG026427	ZNF468	SD	NA
NONHSAG027335	GCKR	SD	NA
NONHSAG033223	MICAL3	SD	0.961855
NONHSAG036196	ESYT3	SD	NA
NONHSAG037168	FYTTD1	SD	-0.830804
NONHSAG037645	PI4K2B	SD	-1
NONHSAG046761	ZFAND2A	SD	1
NONHSAG050503	KCNB2	SD	NA
NONHSAG050764	RBM12B	SD	-1
NONHSAG051758	KDM4C	SD	1
NONHSAG052284	FOXD4L5	SD	NA
NONHSAG053846	MAN1B1	SD	-1
NONHSAG054606	KLF8	SD	-0.347759
NONHSAG000602	NBPF3	SU	0.919014
NONHSAG000737	MAN1C1	SU	-0.107123
NONHSAG001561	BSND	SU	NA
NONHSAG007360	CHID1	SU	0.439571
NONHSAG012848	ZNF10	SU	1
NONHSAG013179	FRY	SU	-0.00521668
NONHSAG017315	LARP6	SU	-0.968676
NONHSAG017902	MAN2A2	SU	-0.140024
NONHSAG018417	DNASE1	SU	0.999782
NONHSAG019993	ZFP1	SU	-0.36072
NONHSAG020773	ODF4	SU	NA
NONHSAG022701	CD300C	SU	NA
NONHSAG023091	OGFOD3	SU	-0.799764
NONHSAG024583	VMAC	SU	NA
NONHSAG024984	EPHX3	SU	1
NONHSAG025357	ZNF675	SU	NA
NONHSAG026360	CLDND2	SU	NA
NONHSAG026546	NLRP2	SU	-0.493375
NONHSAG029613	ACVR1	SU	0.996851
NONHSAG030463	MREG	SU	-0.194
NONHSAG031452	FOXA2	SU	NA
NONHSAG031533	ZNF337	SU	1
NONHSAG037168	LRCH3	SU	0.994071
NONHSAG044524	PDSS2	SU	1
NONHSAG045348	QKI	SU	-1
NONHSAG047392	POU6F2	SU	NA
NONHSAG047935	VPS37D	SU	-1
NONHSAG048685	SPAM1	SU	NA
NONHSAG049991	ASH2L	SU	-1
NONHSAG053846	MAN1B1	SU	-1
NONHSAG000425	KAZN	XH	1
NONHSAG005330	STAM	XH	-1
NONHSAG008506	SCGB2A1	XH	NA
NONHSAG011153	POU6F1	XH	0.918961
NONHSAG012027	TMPO	XH	-0.758476
NONHSAG012576	CLIP1	XH	0.529967
NONHSAG013072	USP12	XH	0.991572
NONHSAG014391	METTL17	XH	-0.891626
NONHSAG015154	SIX6	XH	NA
NONHSAG016320	ATP10A	XH	NA
NONHSAG017315	LRRC49	XH	-0.417268
NONHSAG018417	SLX4	XH	0.369159
NONHSAG019993	LDHD	XH	-0.254348
NONHSAG020623	USP6	XH	-0.104511
NONHSAG022624	MAP2K6	XH	-0.893771
NONHSAG023936	FECH	XH	-0.18609
NONHSAG024300	FGF22	XH	NA
NONHSAG026488	PRPF31	XH	-1
NONHSAG026546	NLRP7	XH	-0.243929
NONHSAG027296	TMEM214	XH	1
NONHSAG029993	UBE2E3	XH	1
NONHSAG032305	AL121845.3	XH	NA
NONHSAG032305	LIME1	XH	NA
NONHSAG033647	CABP7	XH	NA
NONHSAG033966	MGAT3	XH	1
NONHSAG042397	PHYKPL	XH	0.206958
NONHSAG042903	CDYL	XH	1
NONHSAG044135	SLC17A5	XH	0.547481
NONHSAG044489	PREP	XH	-1
NONHSAG048482	RINT1	XH	1
NONHSAG050015	FGFR1	XH	1
NONHSAG001198	HIVEP3	XI	-1
NONHSAG001319	AL358075.4	XI	-1
NONHSAG001319	PIK3R3	XI	-1
NONHSAG003399	XCL2	XI	-1
NONHSAG004888	SMYD3	XI	-1
NONHSAG004962	DIP2C	XI	-0.386323
NONHSAG006083	SLC25A16	XI	0.858855
NONHSAG007097	CPXM2	XI	-1
NONHSAG009058	PGM2L1	XI	-0.251736
NONHSAG012576	CLIP1	XI	0.529967
NONHSAG012848	ZNF891	XI	-1
NONHSAG013533	DLEU7	XI	0.998847
NONHSAG014881	POLE2	XI	0.176443
NONHSAG016435	OTUD7A	XI	NA
NONHSAG016479	AVEN	XI	NA
NONHSAG017529	LINGO1	XI	NA
NONHSAG017678	HOMER2	XI	-0.483744
NONHSAG018713	FOPNL	XI	-0.999992
NONHSAG019978	GLG1	XI	1
NONHSAG020445	ABR	XI	0.165961
NONHSAG020810	GAS7	XI	0.457667
NONHSAG022746	GRB2	XI	-0.50868
NONHSAG024583	AC024592.3	XI	-0.997716
NONHSAG024583	NDUFA11	XI	NA
NONHSAG026546	NLRP7	XI	-0.243929
NONHSAG030198	FTCDNL1	XI	NA
NONHSAG031610	NOL4L	XI	NA
NONHSAG033870	ELFN2	XI	NA
NONHSAG039667	CLPTM1L	XI	-0.7053
NONHSAG039902	DAP	XI	1
NONHSAG046789	SNX8	XI	-1
NONHSAG047200	EVX1	XI	NA
NONHSAG048829	PODXL	XI	-1
NONHSAG048878	CNOT4	XI	1
NONHSAG050205	PXDNL	XI	-1
NONHSAG050590	TPD52	XI	-1
NONHSAG051169	C8orf76	XI	0.206958
NONHSAG051169	ZHX1-C8orf76	XI	-0.253061
NONHSAG051173	ATAD2	XI	-1
NONHSAG052834	SPTLC1	XI	1
NONHSAG053954	PRKX	XI	0.72646
NONHSAG000425	KAZN	XO	1
NONHSAG003937	NAV1	XO	0.21834
NONHSAG003958	PPP1R12B	XO	-1
NONHSAG004665	SLC35F3	XO	1
NONHSAG004668	SLC35F3	XO	NA
NONHSAG006137	PALD1	XO	-1
NONHSAG009535	ELMOD1	XO	NA
NONHSAG009848	POU2F3	XO	NA
NONHSAG011161	SLC4A8	XO	-1
NONHSAG012027	TMPO	XO	-0.758476
NONHSAG012726	TMEM132C	XO	-0.255708
NONHSAG012913	ZMYM2	XO	-1
NONHSAG013012	SPATA13	XO	1
NONHSAG013051	ATP8A2	XO	-1
NONHSAG016645	ITPKA	XO	1
NONHSAG018488	RBFOX1	XO	NA
NONHSAG018945	HS3ST4	XO	NA
NONHSAG020623	USP6	XO	-0.104511
NONHSAG022011	MAPT	XO	-1
NONHSAG022624	MAP2K6	XO	-0.893771
NONHSAG023204	NDC80	XO	1
NONHSAG025320	ZNF98	XO	0.980523
NONHSAG027697	MSH2	XO	-0.175428
NONHSAG032305	ZGPAT	XO	NA
NONHSAG033966	MGAT3	XO	1
NONHSAG036672	FNDC3B	XO	-1
NONHSAG036932	ST6GAL1	XO	0.155725
NONHSAG037753	TBC1D1	XO	-0.0430977
NONHSAG041232	CAMK4	XO	NA
NONHSAG042903	CDYL	XO	1
NONHSAG043142	CDKAL1	XO	-0.805612
NONHSAG045061	UTRN	XO	-1
NONHSAG045154	MTHFD1L	XO	NA
NONHSAG048301	TRRAP	XO	-0.201284
NONHSAG052160	ZCCHC7	XO	-0.508515
NONHSAG052503	PIP5K1B	XO	1
NONHSAG054809	SLC16A2	XO	-0.283458
NONHSAG000305	CA6	XT	0.675701
NONHSAG006077	DNA2	XT	1
NONHSAG008506	SCGB1D1	XT	NA
NONHSAG010410	CLEC4E	XT	NA
NONHSAG013441	LRRC63	XT	NA
NONHSAG014881	POLE2	XT	0.176443
NONHSAG015559	ALKBH1	XT	0.428075
NONHSAG017416	UBL7	XT	-0.386759
NONHSAG023936	NARS	XT	0.233314
NONHSAG033753	RTCB	XT	-1
NONHSAG037471	WDR1	XT	1
NONHSAG038018	NOA1	XT	0.440729
NONHSAG041046	TTC37	XT	-0.739451
NONHSAG042397	COL23A1	XT	-0.253061
NONHSAG045261	TULP4	XT	0.126024
NONHSAG050585	MRPS28	XT	1
NONHSAG052503	FAM122A	XT	NA
NONHSAG053372	OR1J1	XT	NA

## Sheet: fGC_RA_responsive
ID	Gene	Type	Corr
NONHSAG003703	TSEN15	SD	-0.624811
NONHSAG040660	MCCC2	SD	1
NONHSAG046963	SCIN	SD	-0.473195
NONHSAG049870	KIF13B	SD	-0.0280995
NONHSAG027331	IFT172	XH	-0.449278
NONHSAG027331	IFT172	XI	-0.449278
NONHSAG041775	PCDH1	XI	NA
NONHSAG004900	SCCPDH	XO	1
NONHSAG005272	PRPF18	XO	-0.799936
NONHSAG021257	KSR1	XO	1

## Sheet: fGC_Meiotic
ID	Gene	Type	Corr
NONHSAG007190	GLRX3	SD	-0.990695
NONHSAG017348	HEXA	SD	-0.007673
NONHSAG025278	ZNF100	SD	-1
NONHSAG026356	SIGLECL1	SD	0.981319
NONHSAG026581	RPL28	SD	-0.766334
NONHSAG033353	SLC7A4	SD	NA
NONHSAG038698	UGT8	SD	0.996705
NONHSAG041070	ELL2	SD	-1
NONHSAG049737	EGR3	SD	NA
NONHSAG051528	PARP10	SD	-0.318748
NONHSAG015282	ARG2	SU	-0.179878
NONHSAG016582	PAK6	SU	NA
NONHSAG017546	SH2D7	SU	NA
NONHSAG027231	ITSN2	SU	-0.929486
NONHSAG027482	QPCT	SU	-1
NONHSAG028384	MAT2A	SU	-0.770103
NONHSAG029270	CFC1	SU	NA
NONHSAG030166	ANKRD44	SU	NA
NONHSAG031697	EPB41L1	SU	-1
NONHSAG034635	NEK10	SU	-0.617227
NONHSAG034946	XCR1	SU	NA
NONHSAG044447	SIM1	SU	NA
NONHSAG044681	FRK	SU	NA
NONHSAG051995	NDUFB6	SU	0.904861
NONHSAG000550	MINOS1	XH	-1
NONHSAG000550	NBL1	XH	NA
NONHSAG001845	LHX8	XH	0.162432
NONHSAG003346	TMCO1	XH	-1
NONHSAG006997	PRDX3	XH	NA
NONHSAG007240	ADGRA1	XH	NA
NONHSAG008015	FBXO3	XH	-0.529138
NONHSAG014258	PROZ	XH	-0.394427
NONHSAG015266	MPP5	XH	0.334064
NONHSAG015718	GPR68	XH	NA
NONHSAG017546	TBC1D2B	XH	-0.454695
NONHSAG018172	RAB11FIP3	XH	NA
NONHSAG019899	PHLPP2	XH	-1
NONHSAG020261	KLHDC4	XH	-0.514676
NONHSAG020967	ZNF624	XH	-0.489221
NONHSAG021319	SDF2	XH	0.70394
NONHSAG022318	DYNLL2	XH	1
NONHSAG025964	ZNF222	XH	0.217413
NONHSAG026581	UBE2S	XH	0.698936
NONHSAG027327	PPM1G	XH	-0.0267654
NONHSAG027482	PRKD3	XH	-1
NONHSAG029579	GALNT13	XH	NA
NONHSAG030108	STAT1	XH	-1
NONHSAG031600	KIF3B	XH	0.20916
NONHSAG031698	EPB41L1	XH	0.0812343
NONHSAG031711	DSN1	XH	1
NONHSAG032409	NRIP1	XH	1
NONHSAG032965	U2AF1	XH	1
NONHSAG033353	LRRC74B	XH	-1
NONHSAG035879	STXBP5L	XH	1
NONHSAG036117	TMEM108	XH	1
NONHSAG039349	HMGB2	XH	1
NONHSAG039536	CYP4V2	XH	NA
NONHSAG041505	ACSL6	XH	NA
NONHSAG041577	CDKN2AIPNL	XH	1
NONHSAG042846	C6orf201	XH	0.840526
NONHSAG043234	HIST1H4H	XH	1
NONHSAG044329	RNGTT	XH	-1
NONHSAG049137	GIMAP7	XH	NA
NONHSAG049998	BAG4	XH	-0.0944103
NONHSAG051528	SPATC1	XH	0.291906
NONHSAG051734	UHRF2	XH	0.474133
NONHSAG051995	SMIM27	XH	0.904861
NONHSAG054748	CXorf49B	XH	NA
NONHSAG000175	TTC34	XI	NA
NONHSAG002538	CD58	XI	-1
NONHSAG002730	FMO5	XI	NA
NONHSAG003346	TMCO1	XI	-1
NONHSAG012828	CHFR	XI	-0.456333
NONHSAG017260	CLN6	XI	-1
NONHSAG017944	FAM174B	XI	-0.418852
NONHSAG020307	PIEZO1	XI	-0.0369236
NONHSAG021319	SDF2	XI	NA
NONHSAG021389	SLC6A4	XI	NA
NONHSAG029356	TMEM163	XI	NA
NONHSAG029465	ZEB2	XI	-0.581104
NONHSAG030108	STAT1	XI	-1
NONHSAG030399	KANSL1L	XI	-1
NONHSAG030997	KIF1A	XI	1
NONHSAG034956	LRRC2	XI	-1
NONHSAG041505	ACSL6	XI	NA
NONHSAG044540	OSTM1	XI	0.903059
NONHSAG044930	MAP7	XI	0.983282
NONHSAG051327	SLA	XI	NA
NONHSAG052832	SPTLC1	XI	-1
NONHSAG052919	FANCC	XI	1
NONHSAG053659	MED27	XI	0.603337
NONHSAG000550	MINOS1	XO	-1
NONHSAG001866	AK5	XO	-1
NONHSAG007240	ADGRA1	XO	NA
NONHSAG007918	METTL15	XO	-0.927852
NONHSAG008222	C11orf49	XO	1
NONHSAG014658	AKAP6	XO	NA
NONHSAG015159	SIX4	XO	1
NONHSAG016459	SCG5	XO	0.492859
NONHSAG018454	C16orf96	XO	-1
NONHSAG019519	GNAO1	XO	NA
NONHSAG024915	NFIX	XO	-0.471623
NONHSAG029289	PLEKHB2	XO	-0.827147
NONHSAG029579	GALNT13	XO	NA
NONHSAG031389	CFAP61	XO	-1
NONHSAG039214	RXFP1	XO	1
NONHSAG048842	EXOC4	XO	0.815746
NONHSAG049133	AC073111.3	XO	-1
NONHSAG049133	ZNF775	XO	NA
NONHSAG049998	BAG4	XO	-0.0944103
NONHSAG050930	GRHL2	XO	NA
NONHSAG006367	DYDC1	XT	0.955834
NONHSAG011540	GNS	XT	0.394626
NONHSAG015159	SIX1	XT	1
NONHSAG015266	FAM71D	XT	NA
NONHSAG016066	AKT1	XT	NA
NONHSAG018172	DECR2	XT	1
NONHSAG019899	AP1G1	XT	-1
NONHSAG021266	LGALS9	XT	NA
NONHSAG022069	SKAP1	XT	-1
NONHSAG026581	SHISA7	XT	NA
NONHSAG031711	SOGA1	XT	-1
NONHSAG048409	COL26A1	XT	NA
NONHSAG048949	KDM7A	XT	-0.152335
NONHSAG051327	SLA	XT	NA
NONHSAG051528	GRINA	XT	-0.183665

## Sheet: fGC_Oogenesis
ID	Gene	Type	Corr
NONHSAG007504	HBD	SD	NA
NONHSAG010352	PTPN6	SD	1
NONHSAG017394	PML	SD	NA
NONHSAG020580	SMTNL2	SD	1
NONHSAG026606	EPN1	SD	1
NONHSAG030484	IGFBP2	SD	1
NONHSAG054006	CLCN4	SD	NA
NONHSAG007504	AC104389.5	SU	NA
NONHSAG007504	HBG1	SU	NA
NONHSAG030921	LRRFIP1	SU	-0.492823
NONHSAG039055	POU4F2	SU	NA
NONHSAG054143	SMS	SU	0.311858
NONHSAG001043	TEKT2	XH	NA
NONHSAG015352	TTC9	XH	-1
NONHSAG023120	FN3K	XH	NA
NONHSAG034912	ZNF445	XH	-1
NONHSAG044614	FYN	XH	-1
NONHSAG045417	UNC93A	XH	1
NONHSAG049318	PTPRN2	XH	-0.681088
NONHSAG050954	ODF1	XH	NA
NONHSAG055121	AMOT	XH	1
NONHSAG005230	USP6NL	XI	1
NONHSAG009845	TRIM29	XI	NA
NONHSAG010554	GRIN2B	XI	0.351829
NONHSAG017955	RGMA	XI	-0.587951
NONHSAG022916	RBFOX3	XI	1
NONHSAG025286	ZNF208	XI	-0.993334
NONHSAG028274	LRRTM4	XI	0.748396
NONHSAG031964	PREX1	XI	1
NONHSAG031979	KCNB1	XI	0.352479
NONHSAG035802	LSAMP	XI	-0.978049
NONHSAG042181	SLIT3	XI	0.331545
NONHSAG042183	SLIT3	XI	-0.66205
NONHSAG045055	PLAGL1	XI	-1
NONHSAG049317	PTPRN2	XI	NA
NONHSAG049595	DLC1	XI	NA
NONHSAG049740	PEBP4	XI	0.398432
NONHSAG055631	TMLHE	XI	1
NONHSAG000523	IGSF21	XO	NA
NONHSAG005350	MALRD1	XO	-0.730973
NONHSAG015577	NRXN3	XO	1
NONHSAG016805	SEMA6D	XO	-1
NONHSAG018492	RBFOX1	XO	1
NONHSAG020021	TERF2IP	XO	1
NONHSAG027653	PRKCE	XO	NA
NONHSAG029452	ARHGAP15	XO	0.784044
NONHSAG029782	UBR3	XO	0.00539826
NONHSAG034912	ZNF852	XO	-1
NONHSAG036702	NAALADL2	XO	-0.986224
NONHSAG048502	CCDC71L	XO	NA
NONHSAG004955	TUBB8	XT	1
NONHSAG010352	PHB2	XT	1
NONHSAG017955	RGMA	XT	-0.587951
NONHSAG018236	TPSD1	XT	NA
NONHSAG022261	HLF	XT	NA
NONHSAG023120	FN3KRP	XT	0.776389
NONHSAG026615	ZNF444	XT	-0.0113219
NONHSAG028073	ANTXR1	XT	0.179634
NONHSAG030484	IGFBP5	XT	-1
NONHSAG052511	FAM189A2	XT	1

## Sheet: fSOMA
ID	Gene	Type	Corr
NONHSAG001284	BTBD19	SD	NA
NONHSAG005080	AKR1C1	SD	0.260559
NONHSAG005793	SYT15	SD	-1
NONHSAG010163	ERC1	SD	NA
NONHSAG011038	ASB8	SD	NA
NONHSAG020806	GSG1L2	SD	NA
NONHSAG021027	SREBF1	SD	-0.196034
NONHSAG023170	ENOSF1	SD	-1
NONHSAG032703	IFNAR1	SD	-1
NONHSAG041961	ANXA6	SD	NA
NONHSAG048453	RELN	SD	1
NONHSAG049045	CTAGE6	SD	NA
NONHSAG049989	EIF4EBP1	SD	-0.723077
NONHSAG050821	PTDSS1	SD	NA
NONHSAG000975	TRIM62	SU	NA
NONHSAG002330	SARS	SU	-1
NONHSAG003701	COLGALT2	SU	NA
NONHSAG006917	ABLIM1	SU	NA
NONHSAG010995	SLC38A4	SU	NA
NONHSAG013399	GPALPP1	SU	1
NONHSAG015972	HSP90AA1	SU	NA
NONHSAG023170	YES1	SU	-1
NONHSAG025572	CD22	SU	-0.186308
NONHSAG029541	RBM43	SU	NA
NONHSAG030767	B3GNT7	SU	1
NONHSAG031893	ZNF334	SU	0.983793
NONHSAG031980	KCNB1	SU	NA
NONHSAG036127	CDV3	SU	NA
NONHSAG037873	GABRA2	SU	-0.458637
NONHSAG040671	ZNF366	SU	-0.852295
NONHSAG042164	TENM2	SU	NA
NONHSAG045200	CNKSR3	SU	-0.978632
NONHSAG047431	INHBA	SU	0.0881508
NONHSAG048148	STEAP4	SU	NA
NONHSAG050027	TACC1	SU	1
NONHSAG053359	TTLL11	SU	NA
NONHSAG053403	LHX2	SU	0.999991
NONHSAG054008	MID1	SU	NA
NONHSAG006737	KCNIP2	XH	NA
NONHSAG008665	CDC42EP2	XH	-1
NONHSAG010401	FAM90A1	XH	NA
NONHSAG012415	MED13L	XH	1
NONHSAG019556	CPNE2	XH	NA
NONHSAG020183	GSE1	XH	-1
NONHSAG020806	GLP2R	XH	NA
NONHSAG022027	GOSR2	XH	NA
NONHSAG023940	ATP8B1	XH	NA
NONHSAG025033	KLF2	XH	NA
NONHSAG026881	SOX11	XH	-1
NONHSAG028306	CTNNA2	XH	NA
NONHSAG033073	POFUT2	XH	-0.87172
NONHSAG039296	CBR4	XH	NA
NONHSAG040507	IPO11	XH	NA
NONHSAG040507	LRRC70	XH	NA
NONHSAG042265	STC2	XH	-0.490445
NONHSAG043722	BTBD9	XH	NA
NONHSAG048247	PON2	XH	-1
NONHSAG049660	NAT2	XH	NA
NONHSAG001603	DAB1	XI	1
NONHSAG004584	PGBD5	XI	-0.211693
NONHSAG005278	FRMD4A	XI	NA
NONHSAG005280	FRMD4A	XI	-1
NONHSAG005416	PRTFDC1	XI	NA
NONHSAG005901	SGMS1	XI	-0.329688
NONHSAG006052	CTNNA3	XI	NA
NONHSAG006737	KCNIP2	XI	NA
NONHSAG009735	DSCAML1	XI	NA
NONHSAG010684	SOX5	XI	NA
NONHSAG016788	SLC30A4	XI	0.860061
NONHSAG017165	OAZ2	XI	-1
NONHSAG018556	GRIN2A	XI	1
NONHSAG019955	ZFHX3	XI	NA
NONHSAG020400	RPH3AL	XI	1
NONHSAG022314	CUEDC1	XI	NA
NONHSAG022677	SDK2	XI	1
NONHSAG024444	GADD45B	XI	NA
NONHSAG025529	SCGB2B2	XI	NA
NONHSAG035296	FHIT	XI	NA
NONHSAG035801	LSAMP	XI	1
NONHSAG035807	LSAMP	XI	1
NONHSAG036760	PEX5L	XI	NA
NONHSAG037299	ZFYVE28	XI	0.315703
NONHSAG037943	SCFD2	XI	1
NONHSAG039194	PDGFC	XI	1
NONHSAG039829	SEMA5A	XI	-1
NONHSAG042074	EBF1	XI	-0.399188
NONHSAG042265	STC2	XI	-0.490445
NONHSAG042679	MYLK4	XI	NA
NONHSAG046993	MEOX2	XI	NA
NONHSAG048069	MAGI2	XI	1
NONHSAG048834	PLXNA4	XI	NA
NONHSAG055339	GPC3	XI	1
NONHSAG001914	ADGRL2	XO	1
NONHSAG003283	NOS1AP	XO	NA
NONHSAG003742	HMCN1	XO	-0.202857
NONHSAG004238	ATF3	XO	NA
NONHSAG009495	DYNC2H1	XO	-1
NONHSAG009907	GRAMD1B	XO	NA
NONHSAG010073	NTM	XO	NA
NONHSAG011561	HMGA2	XO	NA
NONHSAG011564	HMGA2	XO	NA
NONHSAG015575	NRXN3	XO	-1
NONHSAG017593	TMED3	XO	0.327548
NONHSAG020806	GLP2R	XO	NA
NONHSAG023513	GATA6	XO	0.988723
NONHSAG023786	RNF165	XO	NA
NONHSAG026028	MARK4	XO	NA
NONHSAG027704	MSH6	XO	0.101766
NONHSAG028072	ANTXR1	XO	-1
NONHSAG028306	CTNNA2	XO	NA
NONHSAG029288	PLEKHB2	XO	-1
NONHSAG030737	SP100	XO	-0.996251
NONHSAG032931	ABCG1	XO	-0.475666
NONHSAG033898	POLR2F	XO	NA
NONHSAG034662	RBMS3	XO	-0.0879247
NONHSAG040507	IPO11	XO	NA
NONHSAG041344	DMXL1	XO	NA
NONHSAG044161	SENP6	XO	-1
NONHSAG044873	EYA4	XO	0.227886
NONHSAG045209	TIAM2	XO	NA
NONHSAG046781	ELFN1	XO	NA
NONHSAG048120	GRM3	XO	-1
NONHSAG049921	WRN	XO	NA
NONHSAG001284	PTCH2	XT	NA
NONHSAG003198	PIGM	XT	-0.26082
NONHSAG003701	RGL1	XT	NA
NONHSAG005280	FRMD4A	XT	-1
NONHSAG008665	POLA2	XT	NA
NONHSAG011564	HMGA2	XT	NA
NONHSAG014384	RNASE1	XT	0.604801
NONHSAG018113	CHSY1	XT	NA
NONHSAG022928	TBC1D16	XT	-0.822842
NONHSAG025850	EGLN2	XT	NA
NONHSAG026028	BLOC1S3	XT	NA
NONHSAG026335	KLK2	XT	NA
NONHSAG027704	MSH6	XT	0.101766
NONHSAG028072	ANTXR1	XT	-1
NONHSAG030724	SP110	XT	NA
NONHSAG031164	CDC25B	XT	-1
NONHSAG037299	ZFYVE28	XT	0.315703
NONHSAG038392	ABCG2	XT	NA
NONHSAG043722	GLO1	XT	-1
NONHSAG047383	AMPH	XT	1
NONHSAG048687	TMEM229A	XT	NA
NONHSAG049752	TNFRSF10A	XT	NA
NONHSAG052530	TRPM3	XT	0.982862
NONHSAG054094	CTPS2	XT	NA

## Sheet: mGC_Mitotic
ID	Gene	Type	Corr
NONHSAG004317	LYPLAL1	SD	1
NONHSAG016026	KLC1	SD	0.908098
NONHSAG020005	AC009163.4	SD	1
NONHSAG020005	TMEM170A	SD	1
NONHSAG022758	LLGL2	SD	-0.806103
NONHSAG025947	PLAUR	SD	NA
NONHSAG026427	ZNF28	SD	0.111368
NONHSAG026427	ZNF468	SD	-0.0978473
NONHSAG036745	ZNF639	SD	0.191928
NONHSAG042175	RARS	SD	-1
NONHSAG043938	TMEM14A	SD	-1
NONHSAG047959	RFC2	SD	0.976604
NONHSAG050075	GINS4	SD	-0.40266
NONHSAG050503	KCNB2	SD	NA
NONHSAG003595	AXDND1	SU	NA
NONHSAG010254	GALNT8	SU	-1
NONHSAG010254	KCNA6	SU	NA
NONHSAG016909	LEO1	SU	0.759102
NONHSAG023039	ANAPC11	SU	-1
NONHSAG023485	ROCK1	SU	-1
NONHSAG023836	RPL17	SU	-0.428906
NONHSAG025947	PLAUR	SU	NA
NONHSAG027929	WDPCP	SU	-0.219403
NONHSAG033919	KCNJ4	SU	NA
NONHSAG034819	SLC25A38	SU	0.892663
NONHSAG042175	FBLL1	SU	1
NONHSAG042306	THOC3	SU	1
NONHSAG044336	ANKRD6	SU	NA
NONHSAG001547	SSBP3	XH	0.869432
NONHSAG004224	PPP2R5A	XH	1
NONHSAG008021	LMO2	XH	1
NONHSAG009366	SLC36A4	XH	-1
NONHSAG011153	POU6F1	XH	0.193379
NONHSAG014771	SEC23A	XH	1
NONHSAG027327	PPM1G	XH	-1
NONHSAG028933	ACOXL	XH	-0.104948
NONHSAG030761	ARMC9	XH	0.992787
NONHSAG031334	PCSK2	XH	NA
NONHSAG033966	MGAT3	XH	-0.00345245
NONHSAG044977	CCDC28A	XH	-0.334143
NONHSAG046917	GLCCI1	XH	0.905048
NONHSAG051747	GLDC	XH	-1
NONHSAG053791	GPSM1	XH	NA
NONHSAG055660	ZFY	XH	NA
NONHSAG000297	RERE	XI	-1
NONHSAG000807	WASF2	XI	1
NONHSAG004962	DIP2C	XI	-1
NONHSAG006083	SLC25A16	XI	-0.990849
NONHSAG007957	DCDC1	XI	-1
NONHSAG008021	LMO2	XI	1
NONHSAG008981	CLPB	XI	1
NONHSAG014771	SEC23A	XI	1
NONHSAG014774	SEC23A	XI	0.684318
NONHSAG015673	FOXN3	XI	-1
NONHSAG016479	AVEN	XI	-1
NONHSAG020087	CMC2	XI	0.64562
NONHSAG020435	NXN	XI	NA
NONHSAG020480	RTN4RL1	XI	0.0513486
NONHSAG023217	LPIN2	XI	1
NONHSAG023800	HDHD2	XI	-1
NONHSAG024843	ELAVL3	XI	-0.544985
NONHSAG028723	TBC1D8	XI	-1
NONHSAG028833	UXS1	XI	0.945507
NONHSAG031610	NOL4L	XI	-1
NONHSAG035858	GSK3B	XI	NA
NONHSAG035897	KPNA1	XI	-1
NONHSAG036203	PIK3CB	XI	-0.136882
NONHSAG040476	DEPDC1B	XI	1
NONHSAG051173	ATAD2	XI	-0.971824
NONHSAG053397	DENND1A	XI	0.465249
NONHSAG053600	FNBP1	XI	-1
NONHSAG054128	EIF1AX	XI	-1
NONHSAG001473	ZFYVE9	XO	-0.892756
NONHSAG001474	ZFYVE9	XO	-1
NONHSAG003936	NAV1	XO	-0.179819
NONHSAG007123	ZRANB1	XO	0.974412
NONHSAG007730	CALCB	XO	NA
NONHSAG007918	METTL15	XO	1
NONHSAG009848	POU2F3	XO	NA
NONHSAG010626	PLEKHA5	XO	1
NONHSAG011105	PRPF40B	XO	NA
NONHSAG011653	MYRFL	XO	NA
NONHSAG012913	ZMYM2	XO	1
NONHSAG013628	PCDH17	XO	-1
NONHSAG015293	RAD51B	XO	1
NONHSAG015987	RCOR1	XO	-1
NONHSAG016653	MGA	XO	1
NONHSAG018991	EIF3C	XO	NA
NONHSAG019488	FTO	XO	-0.242299
NONHSAG021020	RAI1	XO	1
NONHSAG022182	ACSF2	XO	-1
NONHSAG025210	ZNF253	XO	-1
NONHSAG030761	ARMC9	XO	0.992787
NONHSAG033206	CECR2	XO	NA
NONHSAG033966	MGAT3	XO	-0.00345245
NONHSAG036932	ST6GAL1	XO	0.797219
NONHSAG043142	CDKAL1	XO	-0.39208
NONHSAG043892	CD2AP	XO	-1
NONHSAG046888	ZNF12	XO	1
NONHSAG050686	CNBD1	XO	NA
NONHSAG052503	PIP5K1B	XO	1
NONHSAG000305	CA6	XT	0.679632
NONHSAG002844	ANP32E	XT	0.95937
NONHSAG014771	SEC23A	XT	1
NONHSAG015673	FOXN3	XT	-1
NONHSAG016026	XRCC3	XT	0.908098
NONHSAG016653	MGA	XT	1
NONHSAG020087	CMC2	XT	0.64562
NONHSAG023039	ALYREF	XT	1
NONHSAG037471	WDR1	XT	1
NONHSAG047352	AOAH	XT	1
NONHSAG050433	CPA6	XT	NA
NONHSAG052503	FAM122A	XT	1

## Sheet: mGC_Mitotic_arrest
ID	Gene	Type	Corr
NONHSAG000073	C1orf159	SD	-1
NONHSAG000238	ACOT7	SD	0.021842
NONHSAG000716	RUNX3	SD	-1
NONHSAG001442	C1orf185	SD	NA
NONHSAG002323	TAF13	SD	-0.604776
NONHSAG003106	SEMA4A	SD	-0.388734
NONHSAG003453	PRRC2C	SD	-1
NONHSAG004448	LBR	SD	0.49247
NONHSAG005297	ACBD7	SD	NA
NONHSAG006376	SH2D4B	SD	0.267225
NONHSAG007295	NLRP6	SD	-0.240955
NONHSAG008138	ACCS	SD	NA
NONHSAG008969	LRTOMT	SD	1
NONHSAG009225	RAB30	SD	1
NONHSAG010824	AMN1	SD	-0.40292
NONHSAG011548	TBC1D30	SD	-1
NONHSAG012386	TBX3	SD	0.30293
NONHSAG012782	SFSWAP	SD	-1
NONHSAG013039	AMER2	SD	NA
NONHSAG013052	SHISA2	SD	-1
NONHSAG013282	NHLRC3	SD	-0.043066
NONHSAG014228	SPACA7	SD	NA
NONHSAG015711	TTC7B	SD	-0.987905
NONHSAG016208	GOLGA6L6	SD	1
NONHSAG016695	EPB42	SD	-0.0715631
NONHSAG017002	CGNL1	SD	-0.419441
NONHSAG017357	ARIH1	SD	-1
NONHSAG017740	SLC28A1	SD	NA
NONHSAG019109	ZNF689	SD	0.990805
NONHSAG019539	MT1H	SD	-0.849248
NONHSAG019771	EDC4	SD	1
NONHSAG019771	NRN1L	SD	1
NONHSAG020323	ACSF3	SD	0.0150052
NONHSAG020987	TNFRSF13B	SD	NA
NONHSAG021582	CCL4	SD	NA
NONHSAG021631	ACACA	SD	NA
NONHSAG021651	GPR179	SD	NA
NONHSAG022701	CD300LB	SD	NA
NONHSAG024380	MEX3D	SD	NA
NONHSAG024428	PEAK3	SD	NA
NONHSAG024756	FBXL12	SD	-0.619978
NONHSAG025278	ZNF100	SD	1
NONHSAG025953	KCNN4	SD	0.0921595
NONHSAG026292	IZUMO2	SD	NA
NONHSAG026862	COLEC11	SD	-0.363081
NONHSAG027468	VIT	SD	1
NONHSAG027637	SIX2	SD	-0.201699
NONHSAG029014	FOXD4L1	SD	NA
NONHSAG029725	GALNT3	SD	NA
NONHSAG030640	MOGAT1	SD	NA
NONHSAG030700	SLC19A3	SD	0.77231
NONHSAG031780	MAFB	SD	NA
NONHSAG033113	FTCD	SD	0.996182
NONHSAG033353	SLC7A4	SD	1
NONHSAG033951	APOBEC3G	SD	NA
NONHSAG034479	IQSEC1	SD	-1
NONHSAG036179	IL20RB	SD	1
NONHSAG036184	SOX14	SD	NA
NONHSAG036515	MFSD1	SD	-1
NONHSAG037204	ZNF141	SD	NA
NONHSAG037709	PCDH7	SD	1
NONHSAG038698	UGT8	SD	0.55793
NONHSAG038955	SETD7	SD	NA
NONHSAG040660	MCCC2	SD	-1
NONHSAG041729	HBEGF	SD	-1
NONHSAG042780	SLC22A23	SD	-0.836651
NONHSAG042848	FAM217A	SD	0.333061
NONHSAG042990	TFAP2A	SD	0.223035
NONHSAG043867	RUNX2	SD	-0.0499446
NONHSAG046837	PAPOLB	SD	NA
NONHSAG046909	MIOS	SD	-1
NONHSAG047192	HOXA11	SD	-0.810683
NONHSAG047329	TBX20	SD	NA
NONHSAG048446	NAPEPLD	SD	NA
NONHSAG048678	ASB15	SD	NA
NONHSAG048914	AKR1D1	SD	NA
NONHSAG048945	TBXAS1	SD	NA
NONHSAG049128	LRRC61	SD	0.0370803
NONHSAG049665	PSD3	SD	0.194686
NONHSAG049737	EGR3	SD	NA
NONHSAG050764	RBM12B	SD	-0.145758
NONHSAG051512	CCDC166	SD	NA
NONHSAG051528	PARP10	SD	NA
NONHSAG052108	UNC13B	SD	-1
NONHSAG052192	SHB	SD	-0.964837
NONHSAG052780	SEMA4D	SD	-0.0606808
NONHSAG054973	HNRNPH2	SD	NA
NONHSAG054973	RPL36A-HNRNPH2	SD	NA
NONHSAG055595	FAM50A	SD	1
NONHSAG000660	ID3	SU	0.0637678
NONHSAG002199	AC118553.2	SU	1
NONHSAG002199	SLC35A3	SU	1
NONHSAG002348	GSTM4	SU	-0.0928539
NONHSAG003453	MYOCOS	SU	-1
NONHSAG003604	FAM163A	SU	NA
NONHSAG003606	TOR1AIP2	SU	-0.197935
NONHSAG004782	FMN2	SU	NA
NONHSAG005713	ZNF487	SU	NA
NONHSAG006587	ENTPD1	SU	-0.255804
NONHSAG006631	RRP12	SU	-0.869925
NONHSAG006660	NKX2-3	SU	NA
NONHSAG007295	PGGHG	SU	-0.240955
NONHSAG007446	OSBPL5	SU	NA
NONHSAG007956	DCDC1	SU	NA
NONHSAG008780	KDM2A	SU	-1
NONHSAG008818	NUDT8	SU	-0.449188
NONHSAG008818	TBX10	SU	0.421314
NONHSAG009325	TRIM64B	SU	NA
NONHSAG009480	MMP10	SU	NA
NONHSAG010384	CLEC4C	SU	-0.982703
NONHSAG013538	C13orf42	SU	0.617567
NONHSAG014006	OXGR1	SU	NA
NONHSAG014285	TMEM255B	SU	0.0467222
NONHSAG014505	DHRS2	SU	-0.122384
NONHSAG014735	PAX9	SU	NA
NONHSAG015282	ARG2	SU	-0.697547
NONHSAG015494	BATF	SU	NA
NONHSAG016820	DUT	SU	-1
NONHSAG017639	MEX3B	SU	-0.0495745
NONHSAG018152	MPG	SU	-0.428939
NONHSAG018911	CACNG3	SU	NA
NONHSAG019539	MT1X	SU	-0.849248
NONHSAG019771	PSKH1	SU	-1
NONHSAG020264	CA5A	SU	NA
NONHSAG020357	CDK10	SU	-0.9461
NONHSAG022701	CD300C	SU	NA
NONHSAG022961	RPTOR	SU	1
NONHSAG024380	MBD3	SU	NA
NONHSAG024388	ONECUT3	SU	NA
NONHSAG024428	LINGO3	SU	NA
NONHSAG024792	PDE4A	SU	-1
NONHSAG025293	ZNF676	SU	NA
NONHSAG025954	LYPD5	SU	-1
NONHSAG026145	SULT2A1	SU	NA
NONHSAG026204	DHDH	SU	NA
NONHSAG026326	C19orf48	SU	-1
NONHSAG026398	ZNF616	SU	NA
NONHSAG026546	NLRP2	SU	-0.173741
NONHSAG028549	TEKT4	SU	NA
NONHSAG028864	RGPD4	SU	-0.328991
NONHSAG029270	CFC1	SU	0.108189
NONHSAG029599	NR4A2	SU	0.1423
NONHSAG029861	SP9	SU	NA
NONHSAG030992	AQP12A	SU	NA
NONHSAG032121	ZBP1	SU	NA
NONHSAG032292	PPDPF	SU	NA
NONHSAG032606	LTN1	SU	-0.0386307
NONHSAG032734	KCNE2	SU	1
NONHSAG033340	CRKL	SU	0.302031
NONHSAG033872	MFNG	SU	NA
NONHSAG033951	APOBEC3H	SU	1
NONHSAG034635	NEK10	SU	-0.186231
NONHSAG035323	PRICKLE2	SU	-0.415808
NONHSAG036038	GP9	SU	NA
NONHSAG036634	SKIL	SU	0.135741
NONHSAG037150	BDH1	SU	NA
NONHSAG038636	PITX2	SU	-0.446055
NONHSAG042898	CDYL	SU	0.167541
NONHSAG044447	SIM1	SU	1
NONHSAG045047	PHACTR2	SU	0.42772
NONHSAG046751	GPR146	SU	NA
NONHSAG047192	HOXA13	SU	NA
NONHSAG047562	SPATA48	SU	NA
NONHSAG048153	ZNF804B	SU	NA
NONHSAG049568	FAM86B1	SU	NA
NONHSAG049984	ERLIN2	SU	NA
NONHSAG050344	ASPH	SU	-0.300382
NONHSAG051053	KCNV1	SU	NA
NONHSAG051097	SLC30A8	SU	0.461506
NONHSAG051460	CYP11B1	SU	NA
NONHSAG051620	DMRT3	SU	0.375675
NONHSAG052780	SEMA4D	SU	-0.0606808
NONHSAG052907	FBP2	SU	-0.706878
NONHSAG053863	NRARP	SU	-0.356373
NONHSAG054248	MID1IP1	SU	-0.969316
NONHSAG055164	KLHL13	SU	0.554803
NONHSAG000136	PRKCZ	XH	NA
NONHSAG000228	CHD5	XH	-1
NONHSAG000381	C1orf167	XH	-0.220877
NONHSAG000945	TSSK3	XH	NA
NONHSAG001172	CITED4	XH	NA
NONHSAG001433	DMRTA2	XH	-1
NONHSAG001729	DNAJC6	XH	1
NONHSAG001845	LHX8	XH	NA
NONHSAG001947	DNASE2B	XH	NA
NONHSAG001948	RPF1	XH	1
NONHSAG002323	TMEM167B	XH	0.981379
NONHSAG002389	KCNA3	XH	NA
NONHSAG002567	SPAG17	XH	-0.531342
NONHSAG003095	ARHGEF2	XH	-0.963493
NONHSAG003188	DUSP23	XH	0.816703
NONHSAG005260	MCM10	XH	-1
NONHSAG005297	RPP38	XH	NA
NONHSAG005301	NMT2	XH	0.855388
NONHSAG005573	CCDC7	XH	-0.321483
NONHSAG005864	C10orf71	XH	NA
NONHSAG006218	SEC24C	XH	1
NONHSAG006394	C10orf99	XH	NA
NONHSAG006508	HTR7	XH	0.640483
NONHSAG006539	CYP26C1	XH	-0.68072
NONHSAG006587	TCTN3	XH	0.429055
NONHSAG006716	LBX1	XH	NA
NONHSAG007021	INPP5F	XH	-0.151185
NONHSAG007261	CYP2E1	XH	1
NONHSAG007857	SVIP	XH	0.497938
NONHSAG008015	FBXO3	XH	-0.0528322
NONHSAG008200	CREB3L1	XH	NA
NONHSAG008233	MADD	XH	0.228425
NONHSAG008512	SCGB1A1	XH	NA
NONHSAG008577	MARK2	XH	1
NONHSAG008646	SNX15	XH	NA
NONHSAG008969	ANAPC15	XH	1
NONHSAG008997	ARAP1	XH	-1
NONHSAG009462	TRPC6	XH	-0.485704
NONHSAG010003	KIRREL3	XH	NA
NONHSAG010659	ABCC9	XH	0.248557
NONHSAG011282	SMUG1	XH	-0.00645032
NONHSAG011747	OSBPL8	XH	0.257915
NONHSAG011832	SLC6A15	XH	-0.0612931
NONHSAG012079	CHPT1	XH	0.878242
NONHSAG012533	SPPL3	XH	-0.156512
NONHSAG012576	CLIP1	XH	0.586087
NONHSAG012749	PIWIL1	XH	-0.497155
NONHSAG012784	MMP17	XH	NA
NONHSAG013128	SLC7A1	XH	-1
NONHSAG013258	TRPC4	XH	0.995196
NONHSAG014002	HS6ST3	XH	-0.237894
NONHSAG014042	DOCK9	XH	0.774145
NONHSAG014258	PROZ	XH	NA
NONHSAG014391	METTL17	XH	1
NONHSAG014412	OR5AU1	XH	NA
NONHSAG014505	JPH4	XH	-0.179285
NONHSAG014833	PRPF39	XH	0.0378321
NONHSAG015266	MPP5	XH	-1
NONHSAG015718	GPR68	XH	NA
NONHSAG015723	CCDC88C	XH	0.97418
NONHSAG015998	TNFAIP2	XH	1
NONHSAG016587	ANKRD63	XH	NA
NONHSAG017069	ANXA2	XH	0.550137
NONHSAG017737	ZNF592	XH	-1
NONHSAG017858	IDH2	XH	0.366448
NONHSAG018120	PCSK6	XH	0.0623467
NONHSAG018152	RHBDF1	XH	-0.103507
NONHSAG018878	HS3ST2	XH	NA
NONHSAG020218	FOXF1	XH	0.0246243
NONHSAG020252	ZCCHC14	XH	0.502362
NONHSAG020314	PABPN1L	XH	NA
NONHSAG020637	DHX33	XH	-1
NONHSAG020967	ZNF624	XH	-0.021612
NONHSAG021319	SDF2	XH	1
NONHSAG021647	MRPL45	XH	1
NONHSAG021651	SOCS7	XH	0.599457
NONHSAG021904	PPY	XH	0.45315
NONHSAG022088	HOXB9	XH	0.144291
NONHSAG022117	PHOSPHO1	XH	-0.220719
NONHSAG022622	ABCA5	XH	0.946615
NONHSAG022624	MAP2K6	XH	-0.191237
NONHSAG022941	EIF4A3	XH	1
NONHSAG023023	GCGR	XH	NA
NONHSAG024060	SERPINB2	XH	NA
NONHSAG024305	RNF126	XH	-0.58144
NONHSAG024610	CD70	XH	1
NONHSAG024658	EVI5L	XH	NA
NONHSAG024756	PIN1	XH	-0.221982
NONHSAG025003	CYP4F8	XH	NA
NONHSAG025052	MED26	XH	1
NONHSAG025090	MVB12A	XH	0.502636
NONHSAG025238	ZNF626	XH	0.50999
NONHSAG025553	SCN1B	XH	-1
NONHSAG025964	ZNF222	XH	-0.475817
NONHSAG026401	ZNF616	XH	NA
NONHSAG026546	NLRP7	XH	0.240162
NONHSAG026590	SBK2	XH	1
NONHSAG026815	PXDN	XH	1
NONHSAG026955	ASAP2	XH	0.381944
NONHSAG027214	KLHL29	XH	0.331255
NONHSAG027296	TMEM214	XH	NA
NONHSAG027634	SIX3	XH	0.290888
NONHSAG027657	EPAS1	XH	0.0769775
NONHSAG028136	NAGK	XH	0.0882095
NONHSAG028728	CNOT11	XH	-0.0252964
NONHSAG028865	RGPD4	XH	0.585672
NONHSAG029433	KYNU	XH	-0.447418
NONHSAG029505	KIF5C	XH	0.105527
NONHSAG029826	DLX2	XH	-0.0301799
NONHSAG029871	GPR155	XH	NA
NONHSAG029993	UBE2E3	XH	0.798964
NONHSAG030066	GULP1	XH	-0.0864705
NONHSAG030171	ANKRD44	XH	NA
NONHSAG030992	AQP12B	XH	NA
NONHSAG031059	PDCD1	XH	NA
NONHSAG031136	EBF4	XH	-0.038385
NONHSAG031600	KIF3B	XH	0.955673
NONHSAG032112	SPO11	XH	0.699069
NONHSAG032292	EEF1A2	XH	NA
NONHSAG032409	NRIP1	XH	-0.429904
NONHSAG032761	RUNX1	XH	NA
NONHSAG032870	WRB-SH3BGR	XH	1
NONHSAG032870	WRB	XH	1
NONHSAG033029	LRRC3	XH	NA
NONHSAG033229	TUBA8	XH	0.9386
NONHSAG033353	LRRC74B	XH	NA
NONHSAG033536	PIWIL3	XH	0.465959
NONHSAG033750	RFPL3	XH	NA
NONHSAG033766	SYN3	XH	NA
NONHSAG033812	RBFOX2	XH	-0.0906895
NONHSAG033970	AL022312.1	XH	-0.944889
NONHSAG033970	MIEF1	XH	-0.944889
NONHSAG034034	CENPM	XH	NA
NONHSAG034224	ZBED4	XH	-0.156428
NONHSAG034435	HRH1	XH	-0.0198938
NONHSAG034701	CMTM8	XH	0.194578
NONHSAG034912	ZNF445	XH	-0.287397
NONHSAG034922	ZNF502	XH	1
NONHSAG035879	STXBP5L	XH	NA
NONHSAG036117	TMEM108	XH	0.603962
NONHSAG036267	PLS1	XH	0.990316
NONHSAG036267	TRPC1	XH	-0.374924
NONHSAG036333	AGTR1	XH	1
NONHSAG036741	PIK3CA	XH	0.00750969
NONHSAG036925	RFC4	XH	0.507506
NONHSAG037064	APOD	XH	NA
NONHSAG037122	NRROS	XH	NA
NONHSAG037122	PIGX	XH	-0.703327
NONHSAG037248	RNF212	XH	-0.6447
NONHSAG037258	MAEA	XH	-0.116374
NONHSAG037514	RAB28	XH	-0.030447
NONHSAG037828	PHOX2B	XH	NA
NONHSAG038159	ADAMTS3	XH	-0.64242
NONHSAG038444	SMARCAD1	XH	-0.0916031
NONHSAG038450	PDLIM5	XH	1
NONHSAG038570	ARHGEF38	XH	NA
NONHSAG039218	PPID	XH	-1
NONHSAG039220	FNIP2	XH	-1
NONHSAG039378	HPGD	XH	0.0708428
NONHSAG039461	ING2	XH	-0.999729
NONHSAG039536	CYP4V2	XH	0.825239
NONHSAG040701	FOXD1	XH	-1
NONHSAG041054	GPR150	XH	NA
NONHSAG041729	SLC4A9	XH	NA
NONHSAG042236	SH3PXD2B	XH	-0.0245388
NONHSAG042588	FOXQ1	XH	NA
NONHSAG042817	FAM50B	XH	NA
NONHSAG043100	RBM24	XH	-1
NONHSAG043691	CCDC167	XH	0.852864
NONHSAG043887	TNFRSF21	XH	1
NONHSAG043975	MLIP	XH	-1
NONHSAG043982	FAM83B	XH	NA
NONHSAG044329	RNGTT	XH	0.950525
NONHSAG045413	TCP10L2	XH	NA
NONHSAG046751	C7orf50	XH	1
NONHSAG047550	UPP1	XH	-0.710551
NONHSAG047562	ZPBP	XH	NA
NONHSAG047678	ZNF479	XH	NA
NONHSAG048187	MTERF1	XH	0.701056
NONHSAG048725	SND1	XH	-1
NONHSAG048910	CREB3L2	XH	-1
NONHSAG049128	RARRES2	XH	-0.212898
NONHSAG050559	ZFHX4	XH	0.180923
NONHSAG051512	MAPK15	XH	-1
NONHSAG051528	SPATC1	XH	NA
NONHSAG052499	TMEM252	XH	NA
NONHSAG052636	TLE4	XH	1
NONHSAG052859	ZNF484	XH	0.587422
NONHSAG053399	DENND1A	XH	NA
NONHSAG053400	LHX2	XH	-0.197241
NONHSAG053428	RABEPK	XH	1
NONHSAG053532	SLC27A4	XH	-0.194206
NONHSAG053664	SETX	XH	-1
NONHSAG054241	SRPX	XH	0.629543
NONHSAG054953	SRPX2	XH	NA
NONHSAG055606	CTAG2	XH	-0.123907
NONHSAG055655	SRY	XH	0.913836
NONHSAG055731	TSPY4	XH	NA
NONHSAG001124	HEYL	XI	0.639055
NONHSAG002424	KCND3	XI	NA
NONHSAG002538	CD58	XI	-1
NONHSAG003095	ARHGEF2	XI	-0.963493
NONHSAG003332	LMX1A	XI	1
NONHSAG003411	NME7	XI	-1
NONHSAG003593	ABL2	XI	0.283339
NONHSAG004820	PLD5	XI	NA
NONHSAG004986	ADARB2	XI	-0.103045
NONHSAG005282	FRMD4A	XI	0.628051
NONHSAG005471	ARMC4	XI	1
NONHSAG005509	SVIL	XI	0.453629
NONHSAG005588	NRP1	XI	NA
NONHSAG005985	ANK3	XI	1
NONHSAG008997	ARAP1	XI	-1
NONHSAG009478	MMP20	XI	NA
NONHSAG010001	KIRREL3	XI	NA
NONHSAG010086	OPCML	XI	NA
NONHSAG011139	FAM186A	XI	NA
NONHSAG012576	CLIP1	XI	0.586087
NONHSAG013734	DACH1	XI	-0.632151
NONHSAG013736	DACH1	XI	1
NONHSAG014042	DOCK9	XI	0.774145
NONHSAG014937	TRIM9	XI	NA
NONHSAG015137	RTN1	XI	0.340893
NONHSAG016349	OCA2	XI	-0.136939
NONHSAG017080	RORA	XI	-1
NONHSAG017528	LINGO1	XI	NA
NONHSAG017955	RGMA	XI	1
NONHSAG018120	PCSK6	XI	0.0623467
NONHSAG018152	RHBDF1	XI	-0.103507
NONHSAG019954	ZFHX3	XI	-0.303338
NONHSAG019958	ZFHX3	XI	-0.347895
NONHSAG020423	VPS53	XI	1
NONHSAG020491	SMG6	XI	0.751244
NONHSAG021013	PEMT	XI	0.690044
NONHSAG021319	SDF2	XI	1
NONHSAG021380	SSH2	XI	-1
NONHSAG021502	ASIC2	XI	NA
NONHSAG021503	ASIC2	XI	NA
NONHSAG022622	ABCA5	XI	0.946615
NONHSAG022931	TBC1D16	XI	NA
NONHSAG023246	DLGAP1	XI	NA
NONHSAG023413	PTPN2	XI	-1
NONHSAG023894	C18orf54	XI	0.0564805
NONHSAG024610	CD70	XI	1
NONHSAG024792	CDC37	XI	-1
NONHSAG025052	AC008764.4	XI	-1
NONHSAG025286	ZNF208	XI	0.0347991
NONHSAG025310	ZNF98	XI	NA
NONHSAG025481	SLC7A10	XI	-0.643568
NONHSAG025756	AC008982.1	XI	1
NONHSAG025756	ECH1	XI	1
NONHSAG026153	LIG1	XI	-1
NONHSAG026546	NLRP7	XI	0.240162
NONHSAG029534	RND3	XI	-0.0864182
NONHSAG029722	GALNT3	XI	-1
NONHSAG030010	PDE1A	XI	-1
NONHSAG030167	ANKRD44	XI	-0.190944
NONHSAG031338	BFSP1	XI	-0.365785
NONHSAG032027	ATP9A	XI	1
NONHSAG032869	HMGN1	XI	-0.232361
NONHSAG033536	PIWIL3	XI	0.465959
NONHSAG033766	SYN3	XI	NA
NONHSAG034855	ULK4	XI	-0.13255
NONHSAG036611	MECOM	XI	1
NONHSAG036680	NCEH1	XI	NA
NONHSAG036891	IGF2BP2	XI	1
NONHSAG036990	FGF12	XI	-0.340927
NONHSAG037052	XXYLT1	XI	0.382593
NONHSAG037061	PPP1R2	XI	-0.724242
NONHSAG038975	RNF150	XI	NA
NONHSAG039649	ZDHHC11	XI	-1
NONHSAG040046	CDH12	XI	NA
NONHSAG041040	MCTP1	XI	NA
NONHSAG041259	REEP5	XI	-1
NONHSAG041556	FSTL4	XI	NA
NONHSAG042181	SLIT3	XI	NA
NONHSAG042183	SLIT3	XI	-0.418004
NONHSAG042769	SLC22A23	XI	0.736198
NONHSAG043782	USP49	XI	0.915481
NONHSAG043872	RCAN2	XI	NA
NONHSAG044045	EYS	XI	-0.226972
NONHSAG044495	ATG5	XI	-0.900837
NONHSAG044540	OSTM1	XI	0.223514
NONHSAG044930	MAP7	XI	-0.994771
NONHSAG046736	PRKAR1B	XI	-0.55055
NONHSAG046751	C7orf50	XI	1
NONHSAG047054	MACC1	XI	NA
NONHSAG047562	ZPBP	XI	NA
NONHSAG049182	PRKAG2	XI	0.919579
NONHSAG050214	ST18	XI	-0.566316
NONHSAG050435	CPA6	XI	NA
NONHSAG050463	SLCO5A1	XI	-0.250294
NONHSAG051169	C8orf76	XI	1
NONHSAG051169	ZHX1-C8orf76	XI	NA
NONHSAG052934	PTCH1	XI	0.714383
NONHSAG054704	TEX11	XI	-1
NONHSAG054835	ATRX	XI	-0.533084
NONHSAG000192	TP73	XO	0.94544
NONHSAG000194	TP73	XO	NA
NONHSAG000381	C1orf167	XO	-0.220877
NONHSAG000424	KAZN	XO	-0.0783341
NONHSAG000431	FHAD1	XO	-0.198745
NONHSAG001475	ZFYVE9	XO	1
NONHSAG001729	DNAJC6	XO	1
NONHSAG001730	DNAJC6	XO	0.6257
NONHSAG001738	PDE4B	XO	0.534659
NONHSAG001947	SAMD13	XO	-0.561161
NONHSAG002520	SLC22A15	XO	NA
NONHSAG003400	XCL1	XO	1
NONHSAG003697	RGL1	XO	0.411522
NONHSAG004265	PROX1	XO	NA
NONHSAG004863	DESI2	XO	-0.15107
NONHSAG005224	CELF2	XO	1
NONHSAG005350	MALRD1	XO	0.999981
NONHSAG006904	CASP7	XO	0.84639
NONHSAG007021	INPP5F	XO	-0.151185
NONHSAG007261	CYP2E1	XO	1
NONHSAG007827	NAV2	XO	NA
NONHSAG008233	MADD	XO	0.228425
NONHSAG009119	UVRAG	XO	1
NONHSAG009353	FAT3	XO	-0.277888
NONHSAG009611	DLAT	XO	-0.816721
NONHSAG009612	DLAT	XO	NA
NONHSAG009793	CCDC84	XO	-1
NONHSAG009859	GRIK4	XO	NA
NONHSAG010479	KLRD1	XO	NA
NONHSAG011191	KRT86	XO	-0.328388
NONHSAG011519	SRGAP1	XO	1
NONHSAG011534	RASSF3	XO	-1
NONHSAG012726	TMEM132C	XO	NA
NONHSAG013122	MTUS2	XO	-0.246876
NONHSAG013188	PDS5B	XO	1
NONHSAG013274	FREM2	XO	1
NONHSAG013538	RNASEH2B	XO	0.617567
NONHSAG015062	TMEM260	XO	-1
NONHSAG015176	AL355916.2	XO	0.990596
NONHSAG015577	NRXN3	XO	NA
NONHSAG016587	PLCB2	XO	NA
NONHSAG017052	FAM81A	XO	NA
NONHSAG017578	MORF4L1	XO	-0.159933
NONHSAG017775	AGBL1	XO	NA
NONHSAG018640	SNX29	XO	1
NONHSAG020054	WWOX	XO	-1
NONHSAG020794	NTN1	XO	NA
NONHSAG020838	SHISA6	XO	NA
NONHSAG021631	TADA2A	XO	-1
NONHSAG022624	MAP2K6	XO	-0.191237
NONHSAG022707	RAB37	XO	1
NONHSAG023432	LDLRAD4	XO	1
NONHSAG023434	LDLRAD4	XO	-1
NONHSAG023438	LDLRAD4	XO	NA
NONHSAG023818	CTIF	XO	NA
NONHSAG024033	TNFRSF11A	XO	NA
NONHSAG024060	SERPINB2	XO	NA
NONHSAG024658	EVI5L	XO	NA
NONHSAG024915	NFIX	XO	1
NONHSAG025090	MVB12A	XO	0.502636
NONHSAG026326	ACP4	XO	-1
NONHSAG027582	MTA3	XO	0.560763
NONHSAG028728	CNOT11	XO	-0.0252964
NONHSAG029284	PLEKHB2	XO	0.100512
NONHSAG031301	ISM1	XO	1
NONHSAG031392	CFAP61	XO	-1
NONHSAG032779	CHAF1B	XO	1
NONHSAG033230	TUBA8	XO	NA
NONHSAG033750	RFPL3	XO	NA
NONHSAG033970	MIEF1	XO	-0.944889
NONHSAG034435	HRH1	XO	-0.0198938
NONHSAG034619	RARB	XO	-1
NONHSAG034912	ZNF852	XO	0.587039
NONHSAG035532	ARL13B	XO	0.998225
NONHSAG035717	CD96	XO	NA
NONHSAG036036	EFCC1	XO	NA
NONHSAG036267	PLS1	XO	0.990316
NONHSAG036472	KCNAB1	XO	NA
NONHSAG039214	RXFP1	XO	NA
NONHSAG039332	GALNTL6	XO	NA
NONHSAG041312	COMMD10	XO	1
NONHSAG041351	TNFAIP8	XO	1
NONHSAG041360	PRR16	XO	NA
NONHSAG041615	SLC25A48	XO	NA
NONHSAG041998	GALNT10	XO	-1
NONHSAG042163	TENM2	XO	NA
NONHSAG042848	C6orf201	XO	-0.285234
NONHSAG042901	CDYL	XO	0.0755622
NONHSAG042998	GCNT2	XO	-1
NONHSAG043865	RUNX2	XO	NA
NONHSAG043975	MLIP	XO	-1
NONHSAG044115	KCNQ5	XO	NA
NONHSAG045048	PHACTR2	XO	1
NONHSAG045193	OPRM1	XO	0.9999
NONHSAG045247	SNX9	XO	-1
NONHSAG045413	TCP10L2	XO	NA
NONHSAG047031	HDAC9	XO	0.676749
NONHSAG047064	ABCB5	XO	-1
NONHSAG047124	STK31	XO	-0.431832
NONHSAG048458	LHFPL3	XO	0.999173
NONHSAG048502	CCDC71L	XO	NA
NONHSAG048897	CHRM2	XO	NA
NONHSAG049353	DLGAP2	XO	NA
NONHSAG049547	BLK	XO	NA
NONHSAG050163	SPIDR	XO	1
NONHSAG050875	VPS13B	XO	-0.97439
NONHSAG051460	GML	XO	1
NONHSAG051751	KDM4C	XO	0.97609
NONHSAG052549	C9orf57	XO	NA
NONHSAG052680	FRMD3	XO	1
NONHSAG055256	XIAP	XO	-0.584361
NONHSAG000228	RPL22	XT	-1
NONHSAG000431	FHAD1	XT	-0.198745
NONHSAG001073	RSPO1	XT	NA
NONHSAG001982	CLCA1	XT	-0.798186
NONHSAG002068	RPAP2	XT	0.445135
NONHSAG003618	CEP350	XT	0.520569
NONHSAG004863	DESI2	XT	-0.15107
NONHSAG005162	SFMBT2	XT	-0.633406
NONHSAG006539	EXOC6	XT	0.627784
NONHSAG006653	HPSE2	XT	-1
NONHSAG007219	PWWP2B	XT	0.682191
NONHSAG007706	PTH	XT	NA
NONHSAG008233	NR1H3	XT	0.988279
NONHSAG008646	ARL2	XT	-0.7776
NONHSAG008819	NUDT8	XT	-0.0569667
NONHSAG008819	TBX10	XT	0.0949619
NONHSAG009478	MMP27	XT	NA
NONHSAG011323	GDF11	XT	NA
NONHSAG011885	CCER1	XT	NA
NONHSAG012960	MICU2	XT	-1
NONHSAG014283	GRK1	XT	NA
NONHSAG014299	RASA3	XT	0.889194
NONHSAG014309	CHAMP1	XT	0.899615
NONHSAG015055	PELI2	XT	-1
NONHSAG015161	SIX1	XT	0.638404
NONHSAG015176	PRKCH	XT	0.990596
NONHSAG015266	FAM71D	XT	NA
NONHSAG015331	CCDC177	XT	0.32314
NONHSAG015559	ALKBH1	XT	0.500387
NONHSAG016810	SEMA6D	XT	-0.970249
NONHSAG017416	UBL7	XT	-0.634089
NONHSAG017955	RGMA	XT	1
NONHSAG018218	LMF1	XT	-0.801693
NONHSAG018236	TPSD1	XT	NA
NONHSAG018434	TFAP4	XT	NA
NONHSAG020220	FOXF1	XT	-0.433456
NONHSAG020314	CBFA2T3	XT	-0.399346
NONHSAG020637	DERL2	XT	1
NONHSAG021577	CCL23	XT	NA
NONHSAG021717	GSDMB	XT	NA
NONHSAG021904	PYY	XT	0.45315
NONHSAG023505	MIB1	XT	0.984652
NONHSAG023956	ALPK2	XT	NA
NONHSAG024292	TPGS1	XT	NA
NONHSAG024756	UBL5	XT	0.651828
NONHSAG025052	SMIM7	XT	-1
NONHSAG025523	SCGB2B2	XT	NA
NONHSAG025553	GRAMD1A	XT	1
NONHSAG025756	ECH1	XT	1
NONHSAG025756	HNRNPL	XT	1
NONHSAG026030	EXOC3L2	XT	NA
NONHSAG026092	CALM3	XT	-1
NONHSAG026153	LIG1	XT	-1
NONHSAG026528	LAIR2	XT	NA
NONHSAG026590	SBK3	XT	NA
NONHSAG026611	NLRP13	XT	NA
NONHSAG026972	GRHL1	XT	-0.617285
NONHSAG027307	TCF23	XT	NA
NONHSAG028069	ARHGAP25	XT	-0.847813
NONHSAG028153	ZNF638	XT	-0.742826
NONHSAG028364	KCMF1	XT	0.378061
NONHSAG028847	ST6GAL2	XT	-0.286036
NONHSAG029722	GALNT3	XT	-1
NONHSAG030671	DOCK10	XT	-1
NONHSAG030750	GPR55	XT	NA
NONHSAG031392	CFAP61	XT	-1
NONHSAG032763	SETD4	XT	0.541848
NONHSAG033029	TRPM2	XT	-1
NONHSAG033068	POFUT2	XT	-0.492423
NONHSAG033229	PEX26	XT	-0.15686
NONHSAG033753	RTCB	XT	-0.943642
NONHSAG036256	ATP1B3	XT	-1
NONHSAG036652	SLC2A2	XT	NA
NONHSAG037391	PPP2R2C	XT	NA
NONHSAG041259	REEP5	XT	-1
NONHSAG041678	HSPA9	XT	-0.376743
NONHSAG043865	RUNX2	XT	NA
NONHSAG047124	STK31	XT	-0.431832
NONHSAG047611	VSTM2A	XT	-0.859842
NONHSAG048409	COL26A1	XT	-1
NONHSAG048610	CAV1	XT	0.958969
NONHSAG051528	GRINA	XT	0.818153
NONHSAG052699	NTRK2	XT	NA
NONHSAG053532	COQ4	XT	-0.176536
NONHSAG055296	ZNF280C	XT	-0.220474

## Sheet: mSOMA
ID	Gene	Type	Corr
NONHSAG001284	BTBD19	SD	NA
NONHSAG002877	ARNT	SD	NA
NONHSAG005716	ZNF487	SD	NA
NONHSAG005870	ERCC6	SD	NA
NONHSAG009084	NEU3	SD	NA
NONHSAG017004	POLR2M	SD	NA
NONHSAG020494	SMG6	SD	NA
NONHSAG028883	GCC2	SD	-0.0509011
NONHSAG030757	C2orf72	SD	NA
NONHSAG032703	IFNAR1	SD	NA
NONHSAG036232	SLC25A36	SD	NA
NONHSAG054489	NUDT11	SD	-1
NONHSAG054975	ARMCX4	SD	0.943413
NONHSAG055036	RAB40A	SD	NA
NONHSAG003066	FDPS	SU	-0.172547
NONHSAG003693	ARPC5	SU	-0.995853
NONHSAG008096	LRRC4C	SU	NA
NONHSAG010310	IFFO1	SU	NA
NONHSAG010995	SLC38A4	SU	NA
NONHSAG015972	HSP90AA1	SU	NA
NONHSAG020268	BANP	SU	-1
NONHSAG022721	CDR2L	SU	-0.232505
NONHSAG025572	CD22	SU	-0.345697
NONHSAG026601	EPN1	SU	1
NONHSAG030757	PSMD1	SU	NA
NONHSAG030867	SH3BP4	SU	NA
NONHSAG038565	PPA2	SU	1
NONHSAG041906	CSNK1A1	SU	NA
NONHSAG043014	NEDD9	SU	NA
NONHSAG043939	GSTA2	SU	0.999775
NONHSAG047469	DBNL	SU	NA
NONHSAG048148	STEAP4	SU	NA
NONHSAG000460	CLCNKB	XH	NA
NONHSAG002877	CTXND2	XH	NA
NONHSAG002938	TDRKH	XH	1
NONHSAG003066	PKLR	XH	NA
NONHSAG010310	GAPDH	XH	NA
NONHSAG011089	TUBA1C	XH	-0.483238
NONHSAG018817	ACSM2B	XH	NA
NONHSAG022027	GOSR2	XH	NA
NONHSAG032234	GATA5	XH	0.324728
NONHSAG037017	HES1	XH	1
NONHSAG037288	NAT8L	XH	-1
NONHSAG055041	TCEAL1	XH	-1
NONHSAG005416	PRTFDC1	XI	NA
NONHSAG009998	KIRREL3	XI	-0.0652082
NONHSAG010684	SOX5	XI	NA
NONHSAG022314	CUEDC1	XI	NA
NONHSAG022747	GRB2	XI	NA
NONHSAG024442	GNG7	XI	0.87563
NONHSAG025050	AC008764.4	XI	-1
NONHSAG025050	MED26	XI	-1
NONHSAG032630	GRIK1	XI	NA
NONHSAG034364	SRGAP3	XI	NA
NONHSAG036760	PEX5L	XI	NA
NONHSAG039812	SEMA5A	XI	NA
NONHSAG039829	SEMA5A	XI	NA
NONHSAG039976	ZNF622	XI	NA
NONHSAG048069	MAGI2	XI	NA
NONHSAG001657	NFIA	XO	NA
NONHSAG003525	RABGAP1L	XO	NA
NONHSAG004238	ATF3	XO	NA
NONHSAG006159	CDH23	XO	NA
NONHSAG010026	KCNJ5	XO	NA
NONHSAG010158	ERC1	XO	1
NONHSAG011089	TUBA1C	XO	-0.483238
NONHSAG012477	HSPB8	XO	-1
NONHSAG015575	NRXN3	XO	NA
NONHSAG018715	ABCC1	XO	-1
NONHSAG029120	GLI2	XO	NA
NONHSAG029752	NOSTRIN	XO	NA
NONHSAG033540	KIAA1671	XO	NA
NONHSAG033898	POLR2F	XO	1
NONHSAG036087	ATP2C1	XO	-1
NONHSAG040170	TTC23L	XO	NA
NONHSAG040711	ARHGEF28	XO	NA
NONHSAG044161	SENP6	XO	NA
NONHSAG044873	EYA4	XO	NA
NONHSAG044981	ECT2L	XO	-1
NONHSAG049921	WRN	XO	NA
NONHSAG051011	ZFPM2	XO	NA
NONHSAG054765	DMRTC1B	XO	NA
NONHSAG000460	CLCNKA	XT	NA
NONHSAG001284	PTCH2	XT	0.261485
NONHSAG002938	LINGO4	XT	NA
NONHSAG002938	RORC	XT	NA
NONHSAG004945	SH3BP5L	XT	1
NONHSAG005082	AKR1C2	XT	NA
NONHSAG009216	PRCP	XT	-0.594847
NONHSAG010310	NCAPD2	XT	NA
NONHSAG010331	MLF2	XT	NA
NONHSAG014384	RNASE1	XT	NA
NONHSAG018987	NUPR1	XT	-1
NONHSAG025024	TPM4	XT	0.213024
NONHSAG040378	ARL15	XT	NA
NONHSAG042689	SERPINB1	XT	-0.0322853
NONHSAG047383	AMPH	XT	NA
NONHSAG052530	TRPM3	XT	-0.227599
