# Supplementary material for: Single-cell profiling of lncRNAs in human germ cells and molecular analysis reveals transcriptional regulation of LNC1845 on LHX8
Source: eLife. 2023 Jan 5;12:e78421. doi: 10.7554/eLife.78421 (PMC9859043; doi:10.7554/eLife.78421)
Supplement: Supplementary file 6. [file elife-78421-supp6.xlsx]

## Sheet: Sheet1
ID	H9_1	H9_2	H9_DN_1	H9_DN_2	H9_DP_1	H9_DP_2
NONHSAG000466	0	0.529605	1.65719	1.94003	5.50671	6.90491
NONHSAG000662	0	0	2.38725	0	25.0504	27.8509
NONHSAG001845	0	0	0.336923	0	3.88903	5.0538
NONHSAG002230	0	0	1.58354	3.70761	11.6317	9.23723
NONHSAG003588	3.32385	5.52073	27.3521	18.5381	52.8715	103.169
NONHSAG003926	0	0	0.738821	2.30645	6.20221	2.46271
NONHSAG003935	0	0	3.33963	0.977402	9.63713	27.83
NONHSAG003937	0.94721	6.29306	13.9483	23.0525	64.5729	97.09
NONHSAG004313	1.02066	0.565087	3.68379	1.035	8.04036	7.85868
NONHSAG004693	0.0979347	0.0813322	0.169665	0.248278	1.4688	1.27248
NONHSAG004904	0	0	3.87806	6.8099	12.2082	22.6218
NONHSAG005487	0.255145	0.0353152	1.4734	0.905557	1.62341	1.84174
NONHSAG005562	0	1.55979	21.15	11.4276	22.1936	27.1152
NONHSAG006362	0.384435	0	5.06165	3.3526	9.36483	27.084
NONHSAG006417	0	0	1.83068	2.14313	2.88152	4.57666
NONHSAG006430	3.04686	3.7955	21.1139	23.1726	65.7746	38.4885
NONHSAG006512	0	0	0	0.225936	0.708819	1.92995
NONHSAG007193	0.215157	0.536046	0.372744	1.0909	3.12909	4.96987
NONHSAG007360	50.8534	25.3394	137.571	29.3541	228.984	273.333
NONHSAG007674	1.2201	0	3.1706	8.04209	6.65409	10.5686
NONHSAG008022	0	0	0.50218	0.587888	13.7009	10.8805
NONHSAG008483	0.329192	0.820156	0.356439	4.84037	1.72052	4.63366
NONHSAG008672	0	1.84099	13.8256	9.44137	27.0005	21.7623
NONHSAG011144	0.110661	0.367603	1.91712	3.92755	4.52635	8.30744
NONHSAG011704	0	0	0.685515	4.01257	2.51769	6.28383
NONHSAG012140	0.789493	7.64928	7.29462	2.93549	27.2693	20.8958
NONHSAG012162	0	0	1.34531	0.984322	0.882305	4.76459
NONHSAG012188	2.07898	4.14369	6.8432	5.90294	16.6293	18.0082
NONHSAG012597	2.52312	1.90489	9.33832	6.28014	9.17361	11.59
NONHSAG014170	8.05534	1.11496	8.1406	2.04214	34.1691	38.7644
NONHSAG014172	0	0	3.85334	1.28886	11.5528	15.5967
NONHSAG014186	0.154772	0.64267	2.14505	1.88336	6.2603	10.9486
NONHSAG014586	0	0.248749	0.086485	0.202491	3.35784	3.74765
NONHSAG014658	0	0	0	7.19149	6.44615	2.55958
NONHSAG014941	0.804156	0	11.8417	2.44637	43.1256	32.5064
NONHSAG015128	0	1.90039	9.25017	6.18795	32.2397	26.4288
NONHSAG015176	0.228641	0.126587	1.84849	2.00941	3.0481	1.87048
NONHSAG016061	0.268489	0.0743244	0.930278	0.544525	2.1964	1.67965
NONHSAG017180	0	0.23333	1.09517	0.99718	2.68149	4.25897
NONHSAG017744	0.891039	2.21995	7.71831	7.68027	14.7809	23.7979
NONHSAG017878	2.23395	0	23.221	3.39801	19.2903	19.3506
NONHSAG018009	0	0.101643	1.16619	3.22689	3.44869	11.8384
NONHSAG018254	4.74542	6.7559	25.2505	12.374	48.6795	32.2969
NONHSAG019903	0.622514	3.10188	13.4808	5.05009	15.2776	24.2651
NONHSAG019976	7.8508	6.05417	51.0036	46.0608	68.302	38.0499
NONHSAG019978	3.31714	16.5288	10.5357	37.0014	29.1463	76.6222
NONHSAG020227	0	0	0.419573	0	2.64166	0.524462
NONHSAG020228	0	0	3.13365	0	14.4684	20.8908
NONHSAG020229	0.89981	1.1209	0.682001	2.62331	5.92969	9.25563
NONHSAG020232	0	0.101202	4.43342	0.74144	14.0673	18.7363
NONHSAG020431	1.93451	5.62296	9.21637	12.751	21.9798	58.6491
NONHSAG020743	1.27543	1.05921	3.31439	31.0405	32.4606	23.937
NONHSAG020810	0	0.314762	11.1625	21.9074	7.57917	30.0946
NONHSAG020850	0	0.129502	0.270152	0	6.66182	8.3296
NONHSAG021154	0.222308	1.10773	5.00673	3.83235	4.4455	7.06071
NONHSAG021750	0	0	2.74358	1.72945	7.52958	5.27607
NONHSAG022177	2.48098	4.12077	43.3394	26.2766	86.3202	64.6702
NONHSAG022185	0	0	0	0.371877	1.33334	1.05886
NONHSAG023117	0	0	1.90635	1.5622	1.40029	4.4481
NONHSAG023227	1.53722	1.17842	1.63885	3.35747	8.16865	6.14563
NONHSAG023490	0.611751	2.28619	2.38458	8.37469	8.89687	8.39012
NONHSAG023617	0	0	6.61339	1.29035	17.3493	1.83704
NONHSAG023825	0.166951	0.415945	0.867693	1.69297	2.57977	5.30252
NONHSAG023959	0.169689	0.0352305	6.50418	6.83992	9.17726	12.8612
NONHSAG024153	0	0	0.771674	0.112922	3.94753	6.43056
NONHSAG026030	20.8707	10.2711	57.5833	18.0286	163.357	74.2103
NONHSAG029826	0.574277	0.953843	21.3902	12.2293	44.3693	62.1803
NONHSAG030120	0.0187833	0.249584	2.50564	1.46664	13.3512	12.0128
NONHSAG030121	0	0	1.81691	0.992604	3.30471	1.00939
NONHSAG030289	0	0	4.00333	11.7165	20.3042	7.78418
NONHSAG030360	0	0	2.93825	0.234527	16.257	19.2543
NONHSAG030860	10.1094	4.19779	83.1906	30.7544	201.009	238.988
NONHSAG031105	0	0	1.19663	0.70043	3.13918	7.97746
NONHSAG031585	2.73193	4.53759	9.46575	11.7739	16.7616	30.5662
NONHSAG032311	0	0.875885	1.64445	8.55603	4.02637	22.2303
NONHSAG032626	0	0	0.367411	4.73129	5.01201	5.51111
NONHSAG032750	0	0	0	0.345537	1.54863	2.21369
NONHSAG032753	0	0	0.63724	1.865	11.7019	17.5239
NONHSAG032804	9.2329	9.20121	83.1759	91.754	105.743	106.635
NONHSAG035029	0.468347	1.94475	6.49103	0.474929	5.95989	17.5797
NONHSAG035347	0.209286	1.91187	2.26609	2.3345	6.18253	5.28748
NONHSAG035579	1.06622	0.110683	7.27313	0.540599	114.238	104.478
NONHSAG035626	0	0	1.10685	0.777458	3.60055	2.21369
NONHSAG036891	1.12417	17.6049	16.415	31.9191	20.8743	63.7583
NONHSAG037464	0	0	0.465063	0	1.95204	5.81323
NONHSAG037776	2.74986	7.99288	28.3734	17.9612	61.2377	48.573
NONHSAG039042	3.45362	1.72088	19.7444	11.9073	21.3465	14.9577
NONHSAG039209	0	0	0.834907	0.977402	9.63713	5.56599
NONHSAG039560	12.5191	14.7955	24.6916	23.8277	50.2441	69.2358
NONHSAG039563	3.73402	10.8535	20.6197	17.5125	44.1228	39.7566
NONHSAG040143	0	0	0	1.70421	9.67472	6.46997
NONHSAG040291	0.153271	0.229117	0.292084	0.590615	2.45197	2.7438
NONHSAG040738	1.06337	2.20776	6.21749	3.77411	8.69903	9.97859
NONHSAG040797	0.797143	2.20669	2.76199	9.70015	5.55502	11.8918
NONHSAG041637	0.236292	0.196234	4.29828	1.19806	4.51036	3.4113
NONHSAG043194	0	0	0	1.98977	7.58009	9.91474
NONHSAG043195	0	0	0	0	2.09553	10.7245
NONHSAG044641	0	0	4.00766	0.631569	19.0861	33.14
NONHSAG045031	0.645679	1.21232	3.84213	2.3628	4.66963	7.01141
NONHSAG045470	0	0	0.394971	0.0513757	5.24982	5.19308
NONHSAG046854	1.61304	5.35835	25.1503	27.8071	24.9251	95.4772
NONHSAG047136	0	0.36119	2.63714	0.882064	6.72049	5.02308
NONHSAG047439	0	0	0	0.272485	5.61762	2.7155
NONHSAG047626	2.61337	3.41052	6.46783	4.16444	4.75087	55.515
NONHSAG048551	0.0729608	0.323157	1.13233	0.832344	1.48111	1.75553
NONHSAG049547	1.08816	1.80738	128.191	82.7592	84.0728	153.954
NONHSAG049595	0	0	0.272398	0.478333	1.28627	0.680988
NONHSAG050546	0	1.14485	22.6883	6.29067	25.2697	23.5505
NONHSAG051100	0	4.05304	14.7961	9.89796	18.2988	19.3757
NONHSAG051932	0	0	0.328082	1.15223	4.47551	1.64039
NONHSAG051968	0.255353	0.477144	4.20262	4.66095	7.5434	5.99052
NONHSAG052094	11.3079	12.5212	14.6926	55.4231	111.349	174.133
NONHSAG052188	8.12209	4.17559	151.43	97.266	203.901	245.123
NONHSAG052486	0	0	0	0	21.1962	3.74061
NONHSAG052805	0	0.474191	4.82234	0.723766	5.57928	2.67905
NONHSAG053134	15.2635	6.99363	88.4473	40.5631	106.685	106.379
NONHSAG054046	0	0	0.491783	1.72715	8.77282	3.27852
