# Supplementary material for: Single-cell profiling of lncRNAs in human germ cells and molecular analysis reveals transcriptional regulation of LNC1845 on LHX8
Source: eLife. 2023 Jan 5;12:e78421. doi: 10.7554/eLife.78421 (PMC9859043; doi:10.7554/eLife.78421)
Supplement: Supplementary file 7. [file elife-78421-supp7.xlsx]

## Sheet: Sheet1
Gene_symbol	H9_1	H9_2	H9_DN_1	H9_DN_2	H9_DP_1	H9_DP_2
LASP1	6.62242	6.95774	16.0257	27.0846	17.1087	61.4918
CFLAR	0.699619	0.55943	1.35992	0.535766	1.95743	1.71676
MSL3	1.508	2.35502	1.75581	1.88162	2.76402	4.46328
FBXL3	0.616852	1.51444	2.98425	3.81385	3.46659	2.87596
FARP2	2.52177	2.34901	4.18775	4.14267	5.32727	9.85032
CYTH3	2.06994	3.26778	5.78048	5.54475	11.9118	11.6352
CRY1	0.490188	0.449142	0.456655	0.684074	0.490273	1.95675
MBTPS2	1.10009	1.20698	2.28528	2.67097	2.31387	2.89639
MVP	1.55364	5.7224	5.04281	7.05655	27.8477	77.1209
PHLDB1	1.49144	2.45055	2.00672	2.46636	4.4804	7.8861
SAMD4A	0.390549	0.605123	5.66206	6.50771	5.64401	5.21807
SLC7A9	0.0807432	0.0570949	0.310828	0.761931	0.470463	0.66044
AKAP11	1.59593	2.7403	3.73576	4.91193	5.5347	3.94211
GLRX2	2.20045	2.22055	4.60864	2.08707	6.02534	3.07956
RNF19A	0.979319	1.95045	4.5629	3.61723	4.93168	4.18766
VCL	21.8602	35.0507	38.9428	35.918	43.4351	56.1608
CLEC16A	1.00114	1.8002	2.65246	4.09816	2.30261	3.63394
FAM214A	0.266591	0.603236	0.817281	1.31822	2.07759	1.8535
ZNF800	0.434366	0.998229	1.7418	2.00674	2.43204	1.38415
HERPUD1	19.6199	8.13046	92.5873	80.3969	115.195	153.716
ATP9A	0.970671	2.05022	1.41614	2.09959	3.04365	3.58829
PRDM1	3.72885	1.17532	4.83331	0.526259	9.6229	4.57502
RASGRF1	0.00703965	0.0497786	0.0554313	0.0697509	0.246106	0.33253
FLYWCH1	0.556251	1.54986	1.57767	1.37494	2.03172	2.51601
MXD1	0.236621	0.89496	2.70379	1.17615	2.99388	3.59858
CTSA	18.0292	11.3182	28.9788	24.0415	47.3937	54.9828
TRAM2	3.95117	3.89219	11.2498	6.4664	28.6634	35.5112
ELOVL1	61.8671	52.1064	248.164	195.348	300.894	269.247
PFKP	10.7461	15.3815	58.103	59.4827	44.5287	109.76
EVI5	6.48208	5.55406	21.64	11.3509	27.2471	13.1549
PKM	18.2509	13.0382	18.682	23.2364	36.1096	105.794
ACSL4	16.3601	8.05133	26.8883	8.14319	38.3953	21.1555
MAST4	0.442957	0.774636	0.992617	1.34163	1.42577	1.35577
OSBPL3	1.152	1.34241	2.44159	0.977152	2.98849	2.58333
WDR1	35.118	33.1964	53.0899	40.9613	63.435	110.685
SEL1L	3.13691	4.18813	9.07412	8.01616	10.9682	14.5024
ATP6AP1	15.2989	12.1033	20.2091	16.8541	33.209	27.2867
ACTN1	22.4471	23.5311	83.8532	71.9493	74.0049	102.484
P4HA2	3.30082	5.02274	69.1284	70.1412	118.365	151.413
STK10	2.33169	2.48676	5.69182	4.61843	9.45382	11.8776
MOV10L1	0.340736	0.165422	0.229591	0.230353	0.794511	0.804919
RBMS2	1.59109	2.87864	7.94406	7.57077	10.6853	13.8306
KLHL20	7.84572	8.2259	12.1789	18.9431	17.6544	34.6742
IL4R	2.82243	3.19494	3.38655	2.7613	7.9873	9.86495
STK17B	4.02065	4.42423	13.8236	10.014	18.3884	41.8364
PLOD1	19.2413	14.2237	45.113	39.4538	56.1017	148.586
RRAGB	6.54079	6.91045	10.9739	13.0342	14.4317	21.9195
CD59	16.3034	13.3035	47.6519	23.7217	82.6505	69.2283
WDR47	0.363469	1.09511	2.38086	2.08029	4.19533	4.67278
TMED2	0.46537	0.309714	0.641867	0.800793	0.877266	5.79931
PPP1R15A	18.1804	24.0175	63.5138	65.8298	72.4859	104.321
MMP2	4.43496	3.46667	34.5125	44.5345	30.3482	171.395
GNAS	2.16984	2.42673	3.51217	5.20309	3.48559	5.25043
C20orf194	0.973857	3.3332	4.95754	5.86716	5.2258	4.54847
MAVS	2.70478	2.83845	4.4014	5.19857	4.31081	11.5549
DAZL	0.606375	1.41565	0.0101052	0.0544956	6.45638	36.2187
SNAP23	1.1373	2.01889	1.86569	2.03743	2.4397	3.59022
MYL6	4.51167	6.20897	23.7872	21.745	26.9313	39.6043
LRRFIP2	1.34947	2.57248	2.14415	2.09604	4.00678	3.31946
DSP	19.5154	19.6026	139.82	112.891	168.907	147.428
JAK2	0.339854	0.528697	0.826607	0.841844	1.92452	1.67486
SH3GLB1	5.66812	7.65691	14.344	13.2783	24.9417	19.9969
LGALS1	70.6599	91.6546	346.986	218.624	582.199	422.509
PMM1	16.202	17.3017	32.8147	32.5701	38.2035	31.3367
SOS2	0.836181	1.31078	3.54332	3.52225	3.73665	3.65257
GSKIP	2.29571	3.5064	1.90409	1.73307	3.21867	8.75045
PYGB	13.8028	18.968	23.0944	19.7144	33.0777	67.1651
MYL9	0.384048	0.630735	1.71688	2.03415	1.65122	3.79999
JAG1	2.77016	4.01865	5.52864	2.78785	10.6108	11.1002
MAP1LC3A	4.87928	9.3689	12.0779	9.79821	20.7373	13.4818
SLC35A2	9.64929	5.70138	22.9165	24.2124	23.6325	41.8486
PHEX	0.0164231	0.0154841	0.109202	0.0697392	0.0837302	0.235083
SYTL4	0.122329	0.106462	0.553242	0.313006	0.503734	0.513764
NDFIP2	3.68098	2.8602	11.513	8.42963	10.3365	13.6176
ACP5	0.0359181	0.321712	0.47766	0.203364	9.84936	11.1494
NDRG4	0.148531	0.348389	0.159745	0.148708	0.158312	1.23566
UBE2W	2.19148	1.70188	2.89821	2.19859	5.54023	5.34456
LIN7B	7.65554	10.3474	29.9939	32.7625	44.8676	33.4129
RPS16	1.26206	2.1646	2.39632	2.41355	2.56691	5.00778
CNTD2	0	0	0.143468	0	0.373226	0.188618
PLD3	133.295	83.9102	302.382	423.477	261.92	330.038
ETFB	0.374867	0.825519	1.34938	1.01575	1.5036	1.0907
NAPA	0.544665	0.660243	0.823194	1.19456	0.908915	1.66699
URGCP	6.11485	7.49899	9.2409	9.2303	11.113	14.5504
AK1	5.9099	7.54257	16.0277	20.0322	36.9928	32.4286
MAPK8	3.10684	4.52664	5.01791	4.30048	6.80422	7.78774
CCSER2	1.98063	2.69581	4.03298	3.22492	6.76705	5.73277
PITRM1	2.25344	2.88237	5.74115	5.1531	5.82644	9.72598
CHIC2	1.75007	0.975003	3.17365	1.91418	8.83551	4.81495
INPP4B	0.0617331	0.0768284	0.254066	0.241173	0.466707	0.427185
CPE	4.51328	6.18232	6.32618	8.01059	12.8561	10.872
RPL34	0.453206	0.538971	1.11384	0.466545	1.23782	1.59233
WFS1	11.7243	13.843	15.7158	12.7809	19.5177	33.8244
TBC1D19	1.781	1.07947	2.72464	3.28444	7.24927	8.44096
KLHL5	5.17703	7.73469	10.678	8.67427	18.1998	17.4551
CCND1	104.433	84.5548	146.198	57.0166	273.156	216.828
KIAA1549L	0.153094	0.414029	1.11948	0.190087	1.44661	1.53234
GTF2H1	3.34424	5.0928	4.99694	5.72461	6.68539	9.18882
ELK3	1.30079	2.76475	10.0571	9.25935	14.4493	15.7844
HCFC2	0.144479	0.284598	1.20266	0.91297	1.62352	1.20287
NCOA7	1.78317	1.8013	6.26389	4.28262	9.17906	5.62034
PTK7	9.78662	19.1588	30.2634	51.5898	33.4422	63.2115
NR3C1	2.85775	2.81829	4.29645	5.566	5.88617	7.51272
C5orf15	7.48893	7.12195	12.1195	8.68045	13.9986	50.7751
SEC24A	0.456207	1.16682	2.57317	2.47994	2.40719	2.44734
RPL24	1.36822	3.07755	5.30814	3.63358	5.18191	5.69163
SLC35F5	0.835568	1.24144	1.87771	2	2.34368	3.06403
ACTR3	16.9622	15.9937	33.4182	29.548	37.0054	57.6905
ITGA4	0.225587	0.362822	1.33281	0.782628	2.02479	1.74208
CLIP4	0.0314648	0.114425	1.23171	1.76877	1.45849	1.46699
EFEMP1	3.89883	2.22051	7.85327	2.94663	10.1957	17.4244
FN1	6.50324	8.45494	224.79	182.7	448.75	534.796
FHL2	4.58875	5.01263	7.95193	4.48694	21.1822	20.3265
AAK1	1.32196	3.7161	3.66794	5.32233	5.73976	5.74312
PLEKHA3	0.709161	0.605931	0.87897	0.787701	1.50916	1.26586
SCP2	0.391354	0.636784	0.357861	0.65521	0.730979	1.39919
GADD45A	6.28361	7.69207	25.3775	14.7759	40.3032	18.4034
WLS	13.8964	12.5084	16.6751	23.9538	26.7156	53.3758
UAP1	4.10798	4.96121	13.2483	11.4567	19.2405	36.1547
ECE1	16.2899	20.5438	48.3554	47.91	38.8579	53.0594
SLC2A1	49.3523	38.9416	127.272	81.4071	106.331	162.984
ABCD3	1.83745	2.29899	2.34491	3.14188	3.9796	5.07385
SGK1	0.276313	0.227538	1.09062	0.599046	3.66449	11.2176
ELL2	1.03014	1.69292	3.56504	3.4698	5.03314	6.20249
CCDC92	0.148753	0.126223	0.450672	0.42111	0.585043	0.401519
GLE1	2.37811	2.94281	3.60988	4.68456	3.90795	11.1726
DCAF4	2.1103	2.62137	2.97164	3.59866	4.62468	8.33611
YPEL5	12.8004	9.57874	28.9695	22.0373	36.8417	47.6044
CNRIP1	5.77219	5.85078	6.5462	3.44382	22.4695	15.6144
LRP11	0.296801	0.559662	1.0322	0.954007	1.83069	0.751067
SIL1	1.2634	1.5403	4.33606	5.00727	5.28308	4.24408
RDH10	4.88003	2.33146	12.7225	15.5908	23.3922	18.0348
A1BG	0.82878	0.99936	2.04251	2.09926	2.82116	1.75541
POLK	0.345453	1.43308	1.22105	1.39087	1.76123	1.53997
ANXA11	5.94857	6.38062	24.0805	25.2949	25.9817	22.4243
GLIPR2	0	0.0161784	0.0240208	0.0161926	0.0749872	0.168429
CALD1	42.4969	45.8148	158.823	123.412	195.746	139.245
PLAU	10.295	15.0453	8.27121	3.00164	30.946	31.6142
SLC25A16	0.523219	0.822171	1.35217	0.974808	1.84676	1.4101
CDKN2C	0	0.0148961	0.453395	0.253454	1.01264	0.426465
IL13RA2	0.0429869	0.0303968	0.0451314	0.0608467	0.821854	0.685643
NRK	0.222694	0.196193	3.53005	2.17034	4.35933	3.04584
LPGAT1	1.88266	2.43783	6.43014	5.96499	7.58066	5.11684
MXD4	17.5237	18.3191	34.0665	30.4674	38.0295	37.5025
PIGT	10.6533	7.67132	11.0915	10.8544	15.3733	25.3394
MAX	17.4268	13.1875	31.1673	16.4597	37.2071	37.1199
SIX1	0.0128392	0.0817094	0.788564	0.208996	17.6317	11.1136
MACF1	5.34447	10.3948	16.4334	14.2082	19.4546	13.4356
KDM4B	0.339604	0.957201	1.21425	1.42529	1.38029	1.36073
RNF6	1.17982	1.83967	3.81131	2.7298	5.94073	9.36269
C22orf23	0.957697	0.773947	6.25628	5.50844	8.0381	4.32708
DNAJB9	8.93111	6.25436	17.0073	14.8911	23.6999	39.297
LRRC17	3.54189	2.0332	1.48194	0.443994	25.9871	19.2747
ORMDL1	0.591597	0.899093	1.00119	0.924876	1.61097	2.14504
PALLD	7.66763	9.24583	53.5177	37.8618	50.7255	40.0725
FXR2	1.84788	2.15686	2.39755	3.15245	2.76814	5.63339
CDKN2D	6.76645	7.46474	11.84	8.8207	30.8141	19.9418
AJUBA	5.96793	10.4075	16.0968	21.1144	16.1626	24.0751
SAT1	9.52755	6.78656	52.1588	23.8826	207	165.663
SNX9	3.51971	4.99901	6.48061	6.04886	9.42791	10.3476
ARPC1B	0.666017	1.00387	2.20813	2.07152	2.04883	2.13965
PXDN	7.07536	8.90855	18.1194	18.9577	34.9215	41.1193
MPP1	1.19819	0.540416	3.6243	3.78622	5.83045	6.30949
POLN	0.0271584	0.537717	0.836389	0.794466	1.27089	0.877464
AKAP12	97.2645	91.2451	238.369	104.494	377.542	272.619
LATS1	3.97885	5.50693	6.13441	8.21324	7.82792	12.8791
TRAF3	1.48032	1.59706	3.09503	2.31686	3.30381	4.35381
RFTN1	1.78547	3.95318	24.3152	12.5742	59.0382	52.0187
SLC6A6	2.13823	3.2994	1.45807	2.0437	6.897	16.2394
IL13RA1	1.97444	1.86531	6.2272	5.71398	11.7809	13.1619
LRRC41	8.95029	10.7166	11.5243	20.5553	12.134	58.7084
EMILIN2	2.51997	2.55766	7.7432	3.2902	15.3792	11.8942
COG6	2.56546	2.86078	5.62842	6.4946	7.27483	9.54407
MICAL2	0.122893	0.0856758	7.8232	2.37162	9.92392	10.2998
LOXL2	10.4594	11.5963	72.2071	50.4132	134.326	411.307
GSTM3	6.66594	3.90198	27.6695	25.2965	31.646	20.2931
SORT1	4.26172	9.33466	10.7151	14.8567	10.5039	16.4448
NOTCH2	5.85557	3.92884	14.3213	6.30459	14.3664	8.62327
SLC38A2	0.492305	1.5946	1.45056	1.66343	2.11667	2.22774
LDHA	204.693	155.844	299.018	204.079	410.836	419.621
COL4A2	4.80035	5.44898	36.5796	23.3483	50.6962	95.4173
STT3A	16.4555	11.3719	27.4308	23.7673	35.48	90.7983
OSTF1	11.7378	8.13135	49.3768	37.0169	58.4438	61.6367
TRAFD1	1.02007	1.59315	1.23858	1.72009	1.8606	15.0512
CD36	0.0417581	0.0454275	0.00674482	0.0272803	0.143881	0.161585
SNX14	1.70684	4.61904	6.81161	8.15305	9.22685	11.1226
DYSF	1.57113	2.62273	3.11964	1.93485	6.4925	6.80564
GNS	5.80063	9.02142	10.1247	11.6507	17.1341	20.7367
RC3H1	0.343167	0.996405	0.733326	1.16492	1.18776	1.15879
ANKRD36	2.63246	8.37917	11.0939	11.0637	11.8301	7.74438
CKAP4	3.19896	7.44502	9.11749	20.5733	12.6255	23.4668
FLNB	1.23241	2.12196	11.8396	7.27205	8.65585	13.0155
LMO7	0.289473	0.37842	4.67108	3.73586	21.17	25.0703
TANK	4.94877	4.08406	6.87273	7.14671	8.41775	13.8268
KLF4	0.506221	0.148586	0.511419	0.324471	1.96175	1.69923
ANKRD42	0.805621	0.676251	2.37918	1.28747	2.8278	2.8314
SDCBP	22.2505	16.2509	21.4714	25.49	29.4308	75.5634
STRA6	6.10801	7.1856	18.6847	20.0897	33.4841	89.3435
SPTBN5	0.169955	0.256379	0.559091	0.433018	1.02121	1.03913
MYOF	0.400093	1.03832	5.41305	6.2879	12.4236	17.3834
RBP4	1.49537	2.4218	6.38119	2.49219	8.74816	7.10213
ITGAV	1.54929	3.35279	22.4414	16.3087	33.3776	24.3404
FBN2	3.35023	5.92907	8.14138	7.68491	9.92139	10.4501
GABARAPL1	12.0429	11.0317	37.8592	28.2451	53.2721	60.016
GLIPR1	0.206136	0.228492	20.5072	12.8777	26.6713	22.5571
GIT2	0.480017	1.25552	1.16508	1.70593	1.33078	2.57427
MTMR6	0.973643	2.12958	3.30157	3.37265	5.79421	5.63906
CERS5	17.4561	10.4284	17.5005	14.5862	27.9866	39.353
RB1	0.677084	1.38654	1.61508	2.03946	2.11262	2.16655
FRMD6	0.790569	0.913336	10.5251	5.01198	19.8163	14.0077
FBLN5	0.210829	0.0795096	3.89569	4.03864	2.83306	9.01901
WARS	40.3846	23.1267	54.2413	35.1367	67.9727	123.566
DNAJA4	0.0106049	0.157477	0.0946383	0.270196	0.307024	0.370825
TPM1	1.07755	3.32418	16.8983	22.3138	20.1699	16.1013
ABHD2	1.70266	2.19296	2.67075	3.56727	4.04139	3.59364
ZFHX3	0.844552	1.90753	5.06514	4.97661	5.97539	4.08029
MAP1LC3B	12.8335	19.4891	27.1546	21.8432	50.6421	39.2957
GALNS	0.403474	0.458838	0.554613	1.08333	0.858868	1.30138
RAB40B	0.338538	0.574525	1.10182	1.46951	2.49033	1.76528
MBD1	5.00819	6.23869	7.23048	9.6013	8.4708	22.9487
RCN3	6.99635	5.02989	26.7519	16.5446	86.906	102.045
TMCO1	0.363002	0.433709	0.716227	0.558113	1.39486	0.85236
TUFT1	4.98361	6.0029	18.2229	12.0928	13.2521	16.1764
SMYD2	2.55197	2.36561	7.89523	9.14694	7.78614	6.70945
LYST	0.0231635	0.0856763	0.342337	0.247165	0.69689	0.603377
MBOAT2	0.758711	1.60668	2.10609	1.5856	4.14445	2.50997
MEIS1	1.40957	0.650925	5.69807	8.30203	3.54433	11.7217
RALB	11.2818	13.8017	22.4431	20.8056	18.5993	36.5245
SLC20A1	12.0505	17.2283	14.0991	12.9592	34.8195	40.3496
AFF3	0.680474	0.500576	2.06836	2.93229	7.00549	5.09351
SUMF1	1.27688	1.15174	1.66781	1.82162	2.76801	4.46554
TMF1	4.5193	5.64787	15.148	13.1253	15.7772	12.0166
TCTA	12.5061	11.4072	24.7373	20.9435	41.3639	43.5191
USP53	0.602457	1.03813	2.11247	2.48791	2.77331	2.20675
PLK2	2.62406	1.56527	58.3314	30.7413	60.6988	106.505
PAM	6.08021	9.42575	7.54078	8.3547	15.2059	21.9146
PNRC1	4.77737	8.27607	9.45501	14.8471	14.2158	9.31531
ARHGAP18	1.39342	1.6404	2.4593	3.08111	4.78908	3.16048
SH3KBP1	13.5924	14.5368	27.2776	24.4175	39.9447	33.962
FBXO25	0.837196	1.3698	2.04022	2.08893	2.65044	1.89316
TACC1	1.7046	2.39502	7.19927	6.42629	12.6028	10.6747
UGCG	18.6669	18.6348	39.0531	30.6457	43.782	38.6423
STOM	5.3111	4.6365	10.2916	9.69877	31.0295	36.7918
GSN	4.72618	7.93099	12.3849	21.3399	26.1806	85.5169
RSU1	44.4297	30.2848	76.0276	49.1497	86.5563	74.0434
BTBD10	44.7079	34.7885	73.9086	38.0885	96.4193	68.8765
TMEM25	7.01622	7.77715	11.3082	13.9216	13.9424	21.5365
ALDOA	0.776432	0.984464	1.68655	1.52852	2.964	3.8762
ARID5B	0.290472	0.237829	10.8462	10.479	13.4327	7.2825
LYPD1	0.637532	0.430318	2.85989	1.14852	5.09713	4.21324
PDCD4	9.67671	10.4568	14.1861	16.7433	16.8863	21.7555
SLC7A11	5.84466	5.51901	7.23565	4.61602	12.5014	9.49164
TMEM263	15.2239	13.31	103.042	77.8442	110.915	75.542
DIP2C	1.71007	3.30732	4.80769	5.43615	6.92011	7.26085
EPS8	2.45266	1.91059	5.02761	3.42044	15.7125	12.7917
NMT2	6.6625	7.82389	11.0388	11.4093	19.7485	20.6732
UTRN	5.64525	6.7924	15.4817	10.145	14.8002	8.45602
ASAP1	3.60458	6.65568	9.913	11.8294	11.4174	10.523
FBXL2	1.18562	1.79282	2.75763	3.60169	3.40759	7.44118
JAZF1	0.415458	0.634559	1.84942	1.24671	2.08788	2.64044
DDAH1	9.72403	12.7783	22.1693	26.0878	21.6899	117.974
ABCA5	0.217796	0.319284	0.697139	0.830864	1.02721	0.661533
SH3RF1	2.44837	3.22529	6.47196	7.28303	12.6206	16.7658
PDLIM3	3.34649	2.7106	12.4359	4.12914	19.1763	17.8204
BTG3	8.04752	9.13058	16.2297	15.7458	19.8356	14.0203
KLF10	0.0523832	0.012347	0.137491	0.247156	0.333833	2.50655
RHOC	40.3103	28.6146	172.373	110.518	195.701	157.741
VPS37A	1.49396	1.67568	2.32028	1.81569	2.76902	4.00727
CFAP70	0.089394	0.27281	0.276621	0.552756	0.508874	0.43872
MAP3K7CL	0.0310859	0.0329721	1.28099	0.517014	2.24145	2.33609
PTDSS1	2.00419	1.98643	1.0958	2.15319	2.36546	12.9829
FBXO32	0.080341	0.0601523	1.21562	0.93652	1.77094	1.38582
FBRS	1.58328	2.69106	5.96789	7.66903	6.45871	5.84553
KIT	1.04286	1.93685	0.67276	0.231202	4.70828	6.92941
SLC37A3	2.85185	5.42425	5.8219	6.72317	4.74558	10.3067
CUL4B	3.58381	5.70101	6.50235	5.48788	13.9072	14.8256
SYNJ1	0.554323	0.61858	1.00937	0.858187	1.60389	1.56214
MED8	9.40917	5.30077	27.2882	20.2154	23.5807	24.6586
ZYX	63.2724	63.4919	137.094	116.07	129.434	129.512
KALRN	0.355334	0.516653	1.52521	1.05441	1.36728	1.27639
SQSTM1	8.49281	10.2092	12.9912	14.3028	20.7965	21.546
JOSD2	11.2416	10.9036	71.1056	59.1072	82.7423	71.569
CMPK1	3.71849	3.20158	8.11344	6.89777	15.3757	21.2053
JAK1	2.12999	3.20008	12.43	10.4779	16.7544	8.56631
FBLIM1	22.7579	27.689	116.782	79.0906	135.431	130.31
NEXN	3.57677	2.87459	22.2665	12.066	31.0715	15.6592
LHX8	0.0175752	0	0.470526	0.248772	6.3267	8.50681
NTNG1	0.164454	0.12981	0.248949	0.433078	0.610027	0.581857
ARPC5	4.30604	3.27516	7.97108	6.26736	16.3053	25.3021
DISC1	0.138104	0.337007	0.477625	0.417794	0.621262	0.405335
PDLIM5	3.57677	4.02443	16.7247	10.7992	25.4219	27.3127
GNPDA2	1.09489	1.16132	1.72939	1.66739	2.11998	3.20844
FSTL1	26.3664	33.0237	63.0997	53.8557	129.672	162.554
FBLN2	7.56052	8.83325	17.2555	14.4026	40.847	104.123
IFI16	0.468707	0.513484	2.88323	2.66311	5.27928	5.6535
TIPARP	3.49622	3.20167	10.4159	6.92831	27.0398	26.6465
SGMS2	0.302108	0.252466	0.764113	0.771019	0.625098	0.679551
TEX264	12.4666	12.7039	30.7894	36.536	31.1932	25.6913
F2RL1	1.92582	2.77369	10.953	2.44164	15.2182	23.5415
RICTOR	1.20191	2.40013	3.39027	3.45001	3.17846	4.4493
GRIK2	0.0783286	0.0260647	0.222521	0.31305	0.372497	0.361801
TMEM200A	0.831426	1.14362	2.59479	2.69226	4.30524	8.29354
COG5	1.98537	2.13648	3.14613	2.42463	4.26137	5.63652
SYTL3	0.265492	0.392534	1.2163	1.24696	3.40148	3.15375
COL1A2	0.363393	0.478479	15.7213	8.58468	13.5872	37.5826
CTSB	8.73238	4.4448	72.9144	78.9309	100.372	175.956
CSMD3	0	0.00240313	0.0945528	0.0240523	0.113242	0.125091
MICALL2	0.798323	1.50349	1.31946	1.02931	2.2495	2.24021
FOXK1	0.416401	0.570014	1.01167	0.812319	1.29477	1.60146
TP53INP1	2.01341	3.91848	3.93034	4.50584	9.18873	8.57431
ABCA1	5.32077	5.75683	11.528	6.02773	14.5693	25.021
AQP3	0.746355	0.603154	1.75374	1.40859	1.43664	2.35472
CFL2	1.11967	0.895009	3.27104	2.30838	3.80799	3.51204
CASP7	1.05994	1.84924	1.36242	2.74824	3.65793	9.32207
C16orf71	0.112591	0.0636922	0.512236	0.701227	0.910243	0.865686
TPP1	1.94395	3.58755	3.42023	4.79262	4.13083	12.3644
IDH3A	2.61397	1.85923	3.72718	3.75791	4.01817	6.30132
TERF2IP	13.5594	15.5633	35.7254	31.2855	64.9156	38.4757
MEI1	0.0712835	0.0549881	0.156483	0.403599	0.184073	0.310084
IGFBP6	36.1427	48.9111	101.298	23.3743	366.634	310.603
LTBP3	0.179866	0.326365	2.69007	1.79177	4.59744	1.86123
STAT3	5.82605	10.7746	8.14449	10.8738	9.83121	21.1816
SLC35G2	0.0326087	0.0115291	0.0427943	0.0576958	0.0534374	0.610129
CTRB2	0	0.210678	0.344084	1.0754	0.585898	1.13321
PGM2	3.79299	4.26999	4.75488	6.11677	5.43234	13.4634
KIAA1024	0.0719525	0.072684	0.188855	0.414661	0.449188	0.283759
SDC2	4.06806	4.22772	4.82915	3.33715	12.0704	11.2113
MYO7B	0	0	0.0250172	0.056214	0.0650812	0.0877072
KIF5B	7.36193	13.1784	21.2397	21.8681	25.1357	15.3583
C11orf24	21.794	14.1629	36.5949	30.7471	40.4342	68.171
ENC1	9.44405	10.4284	96.659	70.2927	104.942	105.953
GNG12	3.63984	5.15804	12.7614	12.0006	21.984	18.4442
CCDC36	0.00807121	0.0799021	0.144056	0.148519	0.361529	0.118834
JUP	3.19641	4.93051	8.74605	12.0918	6.59012	25.2572
ZHX3	0.207507	0.429562	1.55027	0.893929	2.07645	1.63089
YPEL2	0.12097	0.256621	0.681595	0.502275	1.14979	0.890531
BAIAP2	2.82291	2.11383	3.95878	5.18341	6.49834	12.8829
TUBB6	97.2985	83.1716	235.498	216.798	212.782	224.321
BNIP3	8.73545	8.27929	13.0437	5.83401	28.9028	24.3424
ATOX1	0.0466956	0.0660385	0.105054	0.103866	0.182196	0.531999
RIC8A	33.3539	20.9826	40.0838	51.8215	46.0799	94.4046
ZFAND2A	0.030643	0.0216682	0.38606	0.195184	0.334774	0.563951
MSC	0.860064	0.631556	2.01432	0.257526	13.2811	11.3438
TRIML2	5.15631	7.195	22.2196	12.4239	20.9057	19.7384
MAGED1	1.66725	1.60204	3.66552	5.49283	4.96937	29.4081
CDC42EP4	3.69935	5.89311	5.28356	7.95327	5.63526	17.71
LACC1	1.7743	1.15144	5.80618	3.46822	6.02504	4.78738
PCED1B	2.26937	1.39704	5.4379	4.83724	3.32516	5.7325
MB21D2	2.39699	2.43604	2.72356	3.21662	3.77502	6.50571
F2R	7.83029	17.018	19.5281	13.0302	59.4782	49.6811
DCAF4L1	0.0439418	0.290005	0.707386	0.22806	1.27217	0.817686
LIMK2	10.5581	11.1988	19.2558	17.334	21.2564	31.6485
ADI1	0.383426	0.426692	0.976689	1.08546	1.78544	1.49614
CSF1R	0.15605	0.335834	0.869036	1.41173	1.09703	1.66488
CRIP2	15.238	11.6385	89.7156	55.9114	185.301	144.878
ACBD3	7.90196	4.00595	17.2179	9.16644	21.4061	31.2905
CADM1	14.4717	18.8064	64.1016	53.8867	53.9947	48.616
SLC8A1	0.0478264	0.0856744	0.374919	0.462595	1.045	1.1775
CCBE1	1.22136	1.35401	1.05952	1.94123	4.6023	5.00986
ANKRD45	0.216101	0.254681	4.10908	0.084968	3.38396	1.53192
TMEM255B	0.853686	1.1734	3.2578	1.99584	2.86082	2.48907
TMED9	155.678	131.098	287.911	283.652	307.607	269.4
POFUT2	1.407	2.14159	4.43782	3.19831	3.90147	3.16729
COL4A1	1.3635	2.46824	21.326	8.36444	34.1163	35.4862
NANOS3	0.0353728	0	3.19382	2.30318	5.68077	5.51179
RNFT1	0.987067	2.16662	4.2208	5.10838	6.21185	8.41434
S100A13	0.205022	0.691417	2.78169	3.1699	4.44526	3.25076
SPATS2L	2.61183	2.30622	6.64088	7.19488	7.75546	7.66622
CD55	0.390418	0.368095	0.751474	0.334924	1.26667	0.696749
ANXA6	25.7331	23.2509	47.1375	47.5268	63.051	128.139
NOL4L	5.18233	6.55479	12.672	14.4771	14.2734	26.5861
ENTPD4	4.28444	8.48707	12.009	23.0465	12.3721	22.3622
ADARB1	1.82584	2.68054	6.06114	7.56129	6.80487	6.51571
CDC42SE1	0.542936	0.555206	0.631408	0.981327	0.748289	2.29563
SPTAN1	9.41513	15.3731	23.6025	25.179	23.1282	27.2946
FAM114A1	11.6447	13.3634	177.486	174.322	234.432	186.261
PSAP	33.4594	51.3478	31.3676	46.3374	55.851	294.236
KLHDC1	0.24415	0.295959	0.646928	1.08613	1.33367	0.969986
MYO1C	2.00912	2.85356	4.74377	7.88467	3.95187	12.9917
2020-03-05	0.414974	0.693574	0.950565	1.14273	1.36007	1.28674
TPM2	3.52927	5.12816	13.7142	12.6108	12.1196	11.0498
ITGBL1	0	0	0.0653725	0.0160247	0.488548	0.597279
BAZ1A	1.31658	1.64365	2.96947	3.12953	4.37955	4.57867
BMPR2	1.38325	2.49202	11.9511	12.2964	20.0274	19.6451
CFI	0	0.040554	2.55149	3.21671	3.3051	2.84101
ANKRD28	2.36171	4.12022	4.20088	3.76847	6.77547	5.06898
DDX47	0.0762762	0.127485	0.232964	0.147227	0.204541	0.604051
AP1G2	1.67724	2.49383	2.21843	5.14981	2.22543	9.84161
PPME1	13.1503	17.6924	24.9061	21.4444	43.2689	80.0009
RNF103	0.0597879	0.175612	0.231768	0.397101	0.331615	0.6207
ARFGAP3	4.07266	7.89399	10.4291	12.3781	17.278	25.314
ETV5	8.96899	8.45049	15.3483	9.89026	24.8683	26.2655
EID3	0.071469	0.471678	0.250115	0.0674415	1.19722	1.13993
TUBB3	0.0394451	0.0557846	0.0911084	0.134	0.20685	1.27766
CCPG1	5.23629	5.88153	11.3665	7.19795	36.2654	21.8932
NBPF10	0.311262	0.335743	1.26562	1.10519	1.44378	1.37223
PKD1L3	0.0806656	0.02852	0.127035	0.256904	0.198286	0.33815
