# Supplementary material for: Single-cell profiling of lncRNAs in human germ cells and molecular analysis reveals transcriptional regulation of LNC1845 on LHX8
Source: eLife. 2023 Jan 5;12:e78421. doi: 10.7554/eLife.78421 (PMC9859043; doi:10.7554/eLife.78421)
Supplement: Supplementary file 8. [file elife-78421-supp8.xlsx]

## Sheet: LNC1845 KO
Gene_symbol	log2(WT/KO)	pvalue	LNC1845KO PGCLC rep1	LNC1845KO PGCLC rep2	WT PGCLC rep1	WT PGCLC rep2
SEMA3F	-1.63346	0.000137323	333	552	146	75
HS3ST1	-2.6792	3.5e-13	790	802	91	90
TMEM176A	-5.00847	2.57e-29	607	632	12	12
ARHGAP33	-1.02371	0.00930484	455	353	208	105
PDK4	-2.6152	2.17e-08	202	243	29	22
ACSM3	-1.76972	1.01e-06	651	742	177	135
PON1	-2.96666	0.000416776	31	32	0	2
GCFC2	-1.0637	0.00598238	862	743	435	179
SOX8	-1.25439	0.0238818	96	122	54	16
TAC1	-2.21695	0.01062	31	12	2	1
CACNA1G	-2.65722	2.83e-08	190	233	23	23
DLX6	-1.16633	0.0183797	122	123	38	42
SLC13A2	-1.81351	0.0454205	7	9	0	0
MYLIP	-2.1192	3.63e-10	9077	10453	2270	1234
E2F2	-1.77605	5.01e-05	340	358	114	43
TENM1	-1.53754	0.0251705	42	46	8	11
DCN	-1.51813	1.16e-06	37104	28805	9704	7961
TYROBP	-2.32217	0.00458435	43	25	6	0
CD22	-2.53249	9.65e-06	109	143	9	18
ACPP	-2.70288	2.08e-07	152	145	15	15
CHDH	-1.78592	4.82e-05	232	314	77	43
CNTN1	-2.93544	4.18e-12	544	443	67	27
PRDM11	-2.21851	4.42e-06	173	229	27	33
ADGRA2	-1.34682	0.000662068	1517	2474	511	662
SPAST	-1.08728	0.0292727	172	158	93	29
NRXN3	-1.68411	3.81e-05	302	337	76	72
CPS1	-2.40681	3.44e-09	573	856	89	105
BIRC3	-1.63833	0.0201124	52	47	18	3
BTN3A1	-1.87252	3.24e-08	1188	1146	263	221
TNFRSF1B	-1.64119	0.00242759	97	109	32	16
RIPOR3	-1.95223	1.42e-05	1022	1162	116	271
EPHA3	-1.40565	0.00240737	186	206	79	35
DSG2	-1.31896	5.34e-05	17334	13416	6164	3534
PREX2	-3.87693	3.98e-12	174	159	7	6
ARAP2	-1.83123	2.23e-05	313	233	75	40
SCML1	-1.14285	0.000964866	1821	1421	754	406
ARHGAP6	-3.14587	1.33e-06	61	118	6	5
CELF2	-1.7777	1.64e-07	1600	1452	335	334
SLC4A8	-2.76045	1.77e-18	7389	6954	861	725
LAMC3	-2.47236	3.98e-10	867	1051	103	143
ALX4	-2.95498	0.00027146	32	37	2	1
METTL24	-2.60041	6.33e-05	55	104	6	9
PLEKHH1	-1.01027	0.0249881	168	162	61	62
KCNH2	-3.58745	2.14e-20	826	1104	72	44
MCOLN3	-1.64055	2.18e-05	560	527	117	140
PKP2	-1.267	0.000837709	3083	3005	729	1130
TMCC3	-1.82719	9.09e-06	357	335	66	76
PSD	-1.61749	0.00308092	90	166	24	34
RIMBP2	-1.73079	0.00602232	64	72	9	17
PRDM6	-2.64686	2.4e-11	503	575	82	46
GUCY1B1	-2.20567	6.21e-06	297	312	27	61
DGAT2	-1.9118	0.014408	36	27	7	2
CA11	-2.52125	5.62e-14	2152	1681	303	201
CDON	-2.3271	4.8e-08	313	432	53	54
SNCAIP	-2.59683	4.78e-10	604	905	75	101
SBNO2	-1.30885	0.0294953	48	103	26	18
SNAP91	-2.98735	1.94e-05	61	63	6	2
PRKCQ	-1.65311	0.00106548	120	130	35	23
MPPED2	-2.72976	8.14e-10	416	339	30	47
FGFR2	-2.52033	5.63e-12	2169	2750	443	216
KIF26A	-1.80471	3.98e-05	261	445	75	74
STAG3	-1.1031	0.00282636	444	425	172	140
NEO1	-1.32863	0.000637116	1285	2012	442	544
FGFR3	-1.48909	0.00137604	207	473	107	77
PYGM	-3.65595	2.54e-21	1050	1539	74	71
TGFBR3	-1.09382	0.0260331	136	139	70	30
FGF10	-2.07646	0.0102775	38	20	2	4
FRMPD1	-1.77352	0.042627	17	17	3	1
CHAT	-2.88618	0.000153181	30	78	1	5
CAMK2A	-1.24446	0.000370538	1130	1442	451	389
ATP2B1	-1.90474	1.28e-09	7665	7150	1622	1394
TRPM5	-2.08953	0.02189	13	14	0	1
ASIC4	-1.35213	0.0127847	76	138	32	29
PANX2	-1.10967	0.00232679	623	715	307	183
DHRS9	-2.1319	0.00776912	31	28	2	4
ANO8	-1.43632	0.0050404	103	125	36	26
WSCD2	-1.62894	0.00355267	76	108	23	19
KIFAP3	-1.35021	2.41e-05	7963	8716	2691	2363
MBNL3	-2.77429	4e-11	533	653	92	37
RAP1GAP	-1.76729	0.00581992	48	71	13	10
CTTNBP2	-2.25713	1.08e-08	450	581	98	64
PAK3	-1.37559	0.000455915	336	314	108	83
CAPN6	-1.3115	0.00333499	794	834	143	321
DCX	-3.711	1.72e-14	501	335	12	27
ACTN2	-1.89343	8.84e-05	172	183	29	38
NAALAD2	-1.91646	2.16e-07	963	663	157	160
ITM2A	-2.44991	1.42e-11	1011	979	180	97
RUNX1T1	-1.74607	3.06e-07	3027	2319	572	615
CEACAM1	-1.34652	0.00536773	125	148	45	35
RIMS1	-2.4739	2.45e-10	577	466	66	69
PTPRH	-1.45639	0.00467086	379	333	41	133
EPHA6	-1.97701	0.00959995	38	33	8	2
SCTR	-1.89922	0.0283064	12	28	1	3
SLC4A4	-1.1758	0.00199652	503	606	250	138
CHRNA3	-3.08689	1.1e-09	181	253	14	19
KCNN2	-2.42419	3.65e-07	203	256	43	19
LRP2	-4.56528	1.14e-43	6623	5674	235	142
CADPS2	-1.52008	0.0040561	100	102	30	21
PCDHA6	-1.96323	0.0313355	7	11	0	0
COBLL1	-2.15878	2.93e-07	718	954	213	76
SEMA5B	-1.63888	0.000230985	194	210	52	44
GRHL2	-1.24875	0.00908468	144	168	43	53
SNX10	-1.03683	0.0426519	94	109	45	30
TXLNG	-1.10167	0.00241099	904	1092	481	260
DNMT3B	-1.04793	0.0277695	184	311	69	107
ARHGAP28	-3.01094	3.3e-19	1775	1609	170	140
CRLS1	-1.64487	7.4e-07	2590	2665	825	491
CPXM1	-1.09896	0.00388125	1364	1799	477	633
CHGB	-1.22193	0.00839319	260	177	104	41
LTBP4	-1.52892	0.000465478	509	1226	271	191
THPO	-1.99834	0.00256959	57	56	7	10
CHRD	-1.59926	0.00496267	68	145	33	18
CERS4	-1.23569	0.00021934	1435	1590	592	415
NAT14	-1.4302	0.0190417	53	74	19	14
SMPX	-2.50776	0.0062233	15	12	0	0
MYO15A	-1.11828	0.0436214	80	103	24	36
CPA1	-2.50527	1e-05	120	91	14	10
ANGPT2	-1.44407	9.43e-05	651	623	168	183
CD200	-2.74909	2.47e-13	712	772	80	80
PSME1	-1.08596	0.00100739	4241	3775	1927	1074
SEMA6A	-1.69823	1.35e-07	2622	2678	717	544
TYRO3	-1.15421	0.000475775	3659	3539	1212	1258
EZR	-1.05397	0.00105305	45236	32020	17654	11521
MAP3K1	-1.65096	2.2e-07	3626	3596	1047	739
PTGS1	-1.84986	0.000884212	136	168	15	40
SORBS1	-1.74983	5.78e-05	295	267	52	68
BAMBI	-1.42653	1.17e-05	17073	18949	6621	3966
MYO3A	-3.26805	1.3e-12	276	268	20	18
KCNK6	-1.07582	0.00100649	2173	2161	994	632
CBARP	-1.62014	0.0344601	17	54	10	4
SLC7A4	-2.69996	7.46e-12	651	634	62	78
CRYBB1	-1.86285	0.0298152	27	22	0	5
TTC28	-1.00143	0.00329713	1867	1832	678	733
RSPH14	-1.67255	0.00126925	124	113	24	28
BIK	-1.26333	0.00493696	194	153	59	49
MLC1	-1.73125	0.0382886	10	47	8	1
BDKRB1	-1.22907	0.000405529	1083	903	419	246
RPS6KA5	-1.53531	6.46e-05	612	426	175	100
ISM1	-2.26899	3.28e-10	873	693	126	114
ANGPT4	-4.1066	1e-11	128	166	6	3
RSPO4	-3.45235	8.93e-13	228	328	21	13
PLCB4	-1.13053	0.000915407	1072	1083	476	300
ALG13	-1.37954	0.000113871	778	728	287	166
PLS3	-1.16243	0.00227487	20770	21451	5289	8589
ELF4	-1.21799	0.000297451	2900	3528	1096	1034
SCML2	-2.16293	2.69e-06	315	454	44	75
PCSK1N	-2.10843	0.010244	17	61	9	0
PCYT1B	-2.33488	2.79e-10	918	758	165	87
VGLL1	-1.56163	0.000557781	256	198	81	36
PCDH11X	-4.14512	7.01e-35	3033	3004	152	97
ZDHHC15	-1.39795	0.00214913	237	147	57	50
FGF9	-1.22042	0.0038304	269	225	106	58
LYRM1	-1.41595	0.0313105	72	42	9	18
CBLN1	-2.30771	7.46e-05	80	120	12	14
PLLP	-1.42561	0.00481464	148	111	49	23
MMP15	-1.35526	0.000652036	733	1272	395	223
CRISPLD2	-1.29267	4.46e-05	30498	23031	10245	6817
RHBDL1	-1.12097	0.00780662	309	570	178	136
QPRT	-1.39238	1.23e-05	8239	8795	3061	2037
SLC6A2	-4.31797	3.6e-21	438	498	22	9
RASL12	-1.27894	0.0358565	57	67	25	12
CTSH	-1.06757	0.00180718	987	1030	389	354
HOMER2	-2.45917	1.32e-11	718	731	109	87
SCG3	-1.25649	0.0366396	62	61	18	18
CA2	-2.6642	1.45e-11	3308	2152	230	364
FZD3	-1.04405	0.00377837	579	506	250	162
SFRP1	-2.21734	1.04e-11	16554	20654	3438	2679
JPH1	-1.54035	3.58e-05	555	519	138	139
NCALD	-1.77919	4.94e-06	571	581	110	136
DHDH	-2.90082	3.58e-11	617	543	87	27
AMH	-1.32748	0.0401897	31	128	27	18
DKKL1	-1.20324	0.00205581	335	327	116	103
IL4I1	-2.23125	0.014956	9	13	0	0
ZFR2	-1.25675	0.000162109	1185	1109	413	330
MEIS3	-1.33742	2.61e-05	4990	4933	1600	1425
CNFN	-1.12492	0.0378004	99	113	56	19
HAS1	-2.57062	0.00500959	13	15	0	0
DBP	-2.33717	8.86e-09	371	367	55	51
MAG	-3.62798	1.93e-06	62	48	2	1
HPN	-2.6412	1.4e-07	205	154	17	21
ITGB8	-1.91363	3.81e-08	1062	898	203	187
PTN	-1.70331	1.33e-06	6145	5645	1967	889
ADAP1	-1.2909	0.0294251	90	97	14	37
HOXA3	-1.19967	0.0043269	305	204	102	67
CPED1	-1.89762	1.38e-07	704	592	150	113
CRHR2	-2.11268	0.0205262	7	21	0	1
MINDY4	-1.73016	8.83e-05	204	261	57	47
PTPRZ1	-1.51041	0.00859358	72	90	27	14
PPP1R17	-1.93121	0.00394939	69	41	12	6
CLDN15	-1.057	0.00586443	520	681	211	229
TMEM176B	-3.84185	1.9e-21	637	573	37	22
GLI3	-1.01101	0.0023372	3508	4183	1537	1424
MRPL32	-2.02437	0.00539749	28	62	9	4
LHX2	-2.52785	0.00501462	10	26	1	0
PRUNE2	-2.37084	6.17e-09	476	331	58	54
ASPN	-1.64931	0.0332834	37	27	10	2
PTGR1	-1.02123	0.00156915	2681	2073	1052	775
TYRP1	-3.86705	7.82e-19	513	407	29	14
PIP5K1B	-3.09541	3.36e-05	55	51	1	4
ATRNL1	-1.1837	0.00177904	525	490	231	121
MAP3K8	-1.15887	0.00172974	558	500	177	182
HOXB6	-2.18816	7.11e-08	539	560	129	55
CNTNAP1	-1.48531	0.000198313	323	391	117	79
EFNB3	-1.72482	6.33e-07	1274	1482	328	305
FAM20A	-1.9994	3.97e-05	181	171	26	35
MAP2K6	-1.52748	0.000114878	499	329	109	104
SLC9A3R1	-2.64063	2.21e-15	6844	8501	1139	740
GABRA4	-5.15091	1.99e-14	202	120	2	1
SULT1E1	-2.48588	1.31e-05	148	86	11	15
ODAM	-2.54529	9.01e-06	129	84	12	11
MAPK10	-2.16176	2.02e-07	512	370	102	46
DDX25	-1.57418	0.00933191	92	50	17	15
DTX4	-1.45808	4.49e-05	1081	1382	439	265
ELMOD1	-1.46845	0.0105347	99	79	35	12
SOX6	-1.87566	1.04e-08	2297	1971	541	356
SYT10	-2.77703	2.64e-09	215	301	32	21
LIN7A	-1.82185	1.9e-05	320	227	70	45
PPM1H	-1.28269	0.000872134	1151	675	390	194
MANSC1	-1.23581	0.00637789	214	209	55	76
OAS3	-1.47646	0.0452128	24	50	6	10
ART4	-2.33616	3.54e-05	126	123	10	21
RASAL1	-3.93199	8.7e-11	109	176	6	4
GCNT2	-1.88166	1.13e-07	798	887	190	157
TPD52L1	-1.83278	1.02e-07	1056	876	241	173
PHACTR1	-1.20619	0.000962057	994	1017	296	359
CD83	-1.85668	1.09e-05	368	313	59	76
BMP5	-3.03708	1.3e-09	220	202	13	20
BACH2	-1.42672	7.01e-05	710	796	221	206
KHDRBS2	-1.48085	0.0278834	56	42	8	14
BVES	-1.08269	0.00239481	575	562	245	174
WASF1	-1.14196	0.0269256	105	145	34	48
EYA4	-1.3551	0.00323022	182	142	52	42
SOBP	-1.20532	0.00308178	288	323	132	75
SLC16A10	-1.88737	0.000455501	176	95	37	15
SMOC2	-2.38635	5.55e-11	886	908	167	94
TBX18	-1.0637	0.0178873	249	229	66	101
GHR	-1.27632	0.00312915	246	320	123	60
HAND1	-2.53984	2.21e-15	5108	5325	811	558
PDE4D	-1.06312	0.00326004	522	520	208	177
SLC12A7	-1.23876	0.00773152	169	238	56	71
KAT2B	-1.80278	0.000845389	96	111	25	17
FRMD4B	-3.37733	1.07e-22	2398	2452	164	172
ACVR2B	-1.28278	0.000285967	1253	1701	570	384
EPB41L5	-1.78961	7.36e-08	1741	1886	436	366
PDE1A	-3.86202	3.16e-10	169	187	1	11
IFIH1	-1.41761	0.0336553	39	58	17	8
IL1R2	-1.33722	0.0284116	59	62	16	17
IL1RL1	-2.88792	6.18e-10	242	239	21	23
IL18R1	-2.72929	9.62e-12	651	679	60	81
PROC	-3.27305	3.1e-05	39	49	1	2
MARK1	-1.22962	0.000736147	542	545	220	142
ANGPTL1	-1.56241	0.019409	46	51	15	7
RHOU	-1.33053	0.000263237	957	1125	294	331
DNAJC6	-1.29024	0.000267079	679	662	223	197
LEPR	-1.09341	0.0137324	239	271	72	104
HPCAL4	-3.18856	0.000237114	20	36	1	0
GBP1	-1.32999	6.63e-05	1718	1350	572	378
CDK18	-2.23376	1.18e-08	712	1058	133	143
PLPPR5	-3.30493	5.57e-10	180	185	18	6
MAN1C1	-1.35836	0.000539731	742	674	310	127
COLEC11	-3.82309	3.64e-09	88	151	2	6
ZNF541	-3.67525	2.99e-05	25	34	0	0
SLC8A2	-1.68748	0.0494729	18	21	1	4
KIF14	-1.00985	0.0135321	697	430	311	131
TNNT2	-1.45216	0.00589416	98	102	30	23
MREG	-1.44888	0.000903089	236	182	68	47
B4GALT6	-1.75686	0.00129665	87	121	22	21
CA14	-2.02044	3.84e-08	1106	916	166	198
FILIP1	-2.79559	4.79e-14	1694	1447	237	105
PLAGL1	-1.40186	2.63e-05	5695	3938	1768	1072
PCDH17	-3.63098	2.92e-24	3844	4547	339	166
HSDL2	-1.04084	0.00197537	2888	3026	1478	817
GALNT12	-1.20529	0.0366901	72	72	20	24
DENND1A	-1.78516	1.87e-08	4879	3994	1070	893
CSF3R	-1.99428	3.79e-05	191	159	27	34
KLHL29	-1.78612	5.74e-05	244	350	57	68
LGALSL	-1.02193	0.00660109	652	442	266	155
SFRP5	-3.59077	1.82e-08	119	102	2	7
HOXB8	-3.12413	5.76e-08	122	130	13	5
HOXB5	-2.11152	1.05e-08	685	614	112	110
HOXB3	-2.02482	2.81e-10	2830	2473	561	433
HOXB1	-3.34347	2.2e-10	333	269	8	27
GRIA2	-1.9058	0.0131063	30	33	5	4
ENOX1	-1.23807	0.000650254	744	608	287	162
PTK2B	-1.38457	0.000112541	1475	1889	470	507
EPHX2	-1.72569	4.27e-07	1106	1146	280	239
LRAT	-4.16313	1.42e-37	6409	5152	283	188
MND1	-1.06274	0.0139101	340	254	159	65
ZSCAN18	-1.01445	0.00223495	1272	1283	585	410
CD80	-1.74678	0.0465942	22	12	3	1
EEPD1	-1.4732	2.59e-05	753	776	234	189
PHF24	-1.43869	0.00541865	112	105	37	22
TRIM24	-1.83687	4.22e-09	6559	6210	1583	1174
CYREN	-1.85087	0.0213615	36	27	1	7
NECAB1	-1.19543	0.000355592	1276	1193	436	393
ATP7B	-2.0049	3.68e-06	1305	1926	193	371
IKZF4	-1.29608	0.000358298	1168	1418	372	424
PLA2G12A	-1.70585	4.42e-07	2029	2272	640	390
INHA	-1.75467	9.8e-08	1654	1473	392	316
PARD6B	-2.35618	4.01e-14	11125	9814	1832	1293
GDAP1L1	-1.94058	9.37e-06	301	359	92	39
PTGIS	-1.92385	1.17e-08	4587	4241	815	915
TP53TG5	-1.30197	0.0466943	54	53	24	7
ATP8A1	-1.66603	0.00324576	80	94	25	14
HIF3A	-2.35679	5.78e-13	10162	6771	1429	1058
PACSIN1	-2.87011	9.82e-05	48	57	6	1
SPDEF	-1.98344	0.00188517	53	75	13	8
COL21A1	-1.33246	0.00468153	286	142	57	65
CPNE5	-2.81725	2.42e-12	472	518	49	51
MYRF	-2.2391	7.06e-13	12758	12922	2325	1827
DOK4	-1.57072	4.03e-05	13367	16104	2826	4418
EFNB2	-1.54514	5.52e-06	1703	2113	556	453
TEKT3	-2.24258	0.000297727	90	101	6	18
C3	-2.1188	0.000903531	94	145	5	27
TNFSF14	-2.65044	0.00377268	9	21	0	0
FLRT3	-2.81325	1.59e-17	5674	4081	530	489
LRRN4	-2.38692	1.24e-10	2045	3388	452	333
AMOT	-2.8281	1.68e-17	2669	2579	279	266
LRFN3	-1.49119	0.0111094	68	162	46	15
STAT5A	-1.37408	0.00243511	217	190	50	64
RGS13	-2.45013	0.00136984	47	40	1	6
FGD3	-3.081	1.29e-08	152	206	9	17
ABHD8	-1.52354	0.00364803	97	192	48	27
HELB	-1.19788	0.00543375	215	276	79	82
TAS2R4	-1.8056	0.00835489	45	53	13	5
WFIKKN1	-2.67657	8.92e-06	70	145	12	9
LRFN1	-2.95047	7.26e-09	185	284	31	11
ZFP36	-1.78358	0.000643286	108	266	46	33
KDR	-3.10284	5.96e-23	11260	9010	972	781
APOBEC3F	-1.02228	0.0037483	1003	722	410	255
PDE11A	-2.64654	0.000707681	34	39	3	2
CHN1	-1.3267	5.29e-05	1945	1557	582	490
ARHGAP22	-3.2299	4.68e-15	500	668	58	32
CGNL1	-1.58056	5.83e-06	2889	2980	669	797
ATP1B2	-2.40959	0.000579087	41	66	5	6
SGO1	-1.11389	0.0316256	110	91	45	25
PLPPR3	-2.02749	4.03e-05	180	443	73	40
ERMARD	-1.94723	0.00176399	360	68	17	48
KCNA5	-3.23127	0.000325467	17	27	0	0
STARD8	-2.0291	0.00311946	41	75	14	4
TSPAN16	-2.27979	0.0129363	13	10	0	0
LRCH2	-1.93493	7.34e-06	654	616	196	61
BST2	-2.57448	2.1e-16	8279	6977	1116	823
AFDN	-1.56963	1.16e-06	3696	4071	1103	915
STK33	-1.09998	0.00263604	562	474	233	145
HRC	-2.83442	5.2e-09	200	190	20	17
PAK4	-1.33686	0.000195577	2834	3912	969	1060
TAF4	-1.78511	0.01271	25	78	14	5
GATA5	-4.09317	1.47e-28	1660	2337	90	76
PNCK	-3.74146	6.75e-06	30	54	0	1
COX4I2	-2.25302	0.00103385	69	43	5	8
RAB11FIP4	-1.34519	0.000467884	605	756	185	217
KCNC3	-2.43651	0.000468671	46	60	7	4
RAMP2	-2.94572	2.79e-15	838	1028	111	69
RHPN2	-1.50822	0.000443678	217	264	74	54
NUP210	-1.95625	4.57e-06	318	402	60	74
CARD6	-1.56075	0.00563312	142	98	48	12
SERPINF1	-1.76578	1.73e-07	2535	2636	762	428
DLG4	-1.00795	0.0119668	304	423	171	113
MTSS1L	-1.52141	0.0173334	36	128	25	15
RHBG	-3.28886	1.56e-06	74	67	4	3
VSTM2L	-1.16871	0.0357994	79	115	48	18
KANK4	-1.31034	7.45e-05	2196	2181	686	664
SYT4	-3.4826	1.1e-06	65	65	3	2
MTUS2	-1.1429	0.0255517	93	123	40	33
PIK3C2B	-1.32575	0.000119906	955	765	289	237
EPHB2	-1.40128	9.13e-06	14855	11004	4290	3267
KMT5C	-1.41742	9.1e-05	684	828	228	205
PDE6B	-1.68676	1.01e-06	2349	2027	701	363
MACROD1	-1.20988	0.00317429	348	530	192	107
RARRES3	-1.95396	0.000257346	140	101	30	14
NTS	-2.99892	3.63e-07	101	111	9	7
SFTPD	-2.77397	2.95e-08	202	196	15	23
CNTN6	-3.11504	1.19e-16	826	633	72	50
WNT2B	-1.27123	0.000442304	2685	2320	657	882
MYCN	-3.40737	1.72e-21	1693	1248	128	75
IL6ST	-1.24462	0.000548412	5979	5802	2794	1191
FST	-1.50021	6.85e-06	9112	9757	3420	1858
ERN2	-1.51005	0.0169264	56	69	23	8
RERG	-3.24198	4.75e-10	213	146	13	11
RAB33A	-1.34133	0.000405934	503	370	156	108
STK26	-2.16793	2.96e-09	2352	2445	332	443
HOOK1	-3.01106	9.38e-17	1174	866	113	73
DSC2	-2.17867	1.33e-09	7435	3888	1132	740
DSC3	-1.78356	4.55e-07	1585	2002	389	396
DSC1	-2.51741	0.00602214	13	14	0	0
FHOD3	-2.06158	1.59e-07	439	562	93	85
PDGFRA	-1.03256	0.00545987	2366	2157	672	972
TBX3	-1.38529	2.68e-05	4949	5088	1937	1102
RNFT2	-1.51638	1.34e-05	11473	6405	2886	1901
BICDL1	-2.76228	2.46e-09	559	499	31	71
DTX1	-1.73958	0.00803084	47	60	13	8
KCP	-1.27635	0.00989255	170	101	51	32
ADGRB3	-2.26392	0.000153887	87	81	10	12
ANKRD6	-1.13399	0.00119015	722	755	280	240
MRAP2	-1.44086	7.53e-05	550	596	180	144
EPHA7	-1.43646	0.0026365	181	121	47	35
PRRG4	-1.81016	0.00506508	57	68	18	6
AMHR2	-5.03653	1.04e-35	2339	2171	31	56
PKIB	-1.28902	0.00948405	172	99	50	32
NMBR	-1.96308	0.0313545	8	10	0	0
STX11	-1.79929	0.00868991	55	52	5	13
KCNK1	-1.13284	0.00129142	1025	1010	476	260
VILL	-3.02725	3.53e-06	71	125	12	2
PCDH8	-1.23303	0.0141875	104	131	39	35
EDNRB	-2.69586	1.69e-06	116	108	12	10
DGKB	-2.2298	0.00771878	29	20	2	2
CIB2	-1.08499	0.00929211	220	241	94	73
SCN7A	-1.55785	0.00650742	281	72	62	23
GATA4	-3.24899	7.14e-22	3585	4333	319	292
HLX	-1.64451	4.25e-05	359	492	127	82
TMOD1	-1.36761	0.00688609	120	128	31	38
ANGPTL2	-1.578	4.61e-06	3252	4083	923	942
LRRC1	-1.0383	0.00159354	1607	1294	606	489
MGARP	-2.40329	7.03e-09	575	494	109	43
TTC29	-2.99577	3.42e-13	509	399	53	29
C11orf1	-1.07877	0.00176946	1956	1444	816	454
ARHGAP20	-1.66137	0.000465046	336	149	71	41
CASP1	-1.59271	0.0292774	42	30	6	8
UNC13C	-2.63178	6.64e-05	75	58	6	6
SMAD6	-1.46029	4.38e-05	1165	1498	478	283
SEMA6D	-1.44478	7.38e-05	868	673	204	219
IFI44L	-1.00871	0.0447787	178	102	42	58
SLC3A1	-1.10003	0.0321559	184	102	74	28
TET1	-1.23837	0.00133113	1044	1154	530	216
SLC40A1	-1.72389	0.00018907	3378	2449	314	876
PARP9	-1.15114	0.00137895	950	654	279	268
MNS1	-1.36346	0.0298017	75	85	39	7
HERC6	-1.31287	0.0274679	56	82	19	20
PDE5A	-1.0674	0.00239337	1915	1300	776	431
FRAS1	-2.02906	3.24e-10	3600	3881	768	631
SINHCAF	-1.18674	0.00246691	538	412	140	170
PRICKLE1	-1.2716	9.59e-05	2438	1902	826	573
RDH16	-1.19095	0.044815	60	77	18	24
GALNT6	-1.51171	1.61e-06	3999	3699	1179	910
KRT71	-2.21433	0.0115626	15	27	3	0
SLAIN1	-2.34879	0.0104583	12	12	0	0
GRTP1	-1.75615	2.63e-06	535	440	124	94
CDH24	-1.17963	0.00215617	519	755	273	170
NOVA1	-2.31103	4.63e-08	293	328	55	37
AK7	-2.22551	8.51e-08	599	332	72	70
LYSMD2	-1.84801	0.0041909	100	47	21	6
PSTPIP1	-1.58193	0.0493605	29	28	10	1
PCSK6	-1.80648	0.000868713	87	152	25	23
SH3GL3	-3.14243	2.65e-17	753	780	70	56
MYLK3	-1.32177	0.0444567	48	46	17	9
NKD1	-1.65001	8.29e-07	2731	2575	849	476
ADAMTS18	-1.14746	0.000990664	933	999	340	329
IMPA2	-2.21315	7.25e-10	804	913	166	115
GNAL	-1.04815	0.0146582	192	199	82	63
ASXL3	-1.84017	8.63e-07	667	772	200	111
ADCYAP1	-1.59976	0.00372892	90	102	31	15
GATA6	-1.27802	0.000491377	510	573	189	155
RNF157	-1.17394	0.0083265	181	223	89	50
CBLN2	-4.50249	4.05e-10	74	129	3	0
IFITM3	-1.18063	0.000131495	48896	44612	19144	13261
LMTK3	-1.74368	0.0376641	14	29	3	3
FBN3	-1.18321	0.0107515	289	491	92	158
CELA2A	-2.56886	0.00504248	11	17	0	0
FHAD1	-1.6294	0.0331817	34	28	4	7
RXRG	-3.19897	4.76e-13	311	315	26	21
RGS5	-1.87013	8.85e-09	4995	4650	1291	764
RGL1	-1.18013	0.000294491	1792	1762	725	505
ADAMTSL4	-1.03857	0.00878086	353	402	190	101
SELENBP1	-1.13527	0.000638896	4383	3551	1333	1410
SLC27A3	-2.56812	9.28e-06	318	112	40	8
AQP10	-1.83388	0.0013808	96	105	13	24
GATAD2B	-1.34581	0.00460285	151	130	46	36
INTS3	-1.08764	0.0293455	103	190	55	49
MAP3K21	-1.21809	0.0280197	78	112	24	34
PLEKHA6	-2.51685	6.95e-10	631	618	62	91
GDF7	-3.30266	1.78e-22	3622	3816	363	204
VPS54	-1.15599	0.00209981	406	395	164	115
FBLN7	-2.27661	1.42e-06	208	194	40	20
NXPH2	-3.07728	4.9e-11	397	319	19	36
GALNT13	-1.86788	0.00073653	130	154	15	36
ACKR2	-1.56121	0.000364904	205	220	57	50
FAM198A	-2.23114	0.00832593	17	31	3	1
MED12L	-2.38743	8.44e-10	545	648	110	62
EAF2	-1.03881	0.0104556	369	255	150	86
ATP10D	-1.71035	8.92e-07	1823	1903	403	449
SNCA	-1.63028	4.89e-05	887	429	177	138
CDH18	-2.54702	0.000302173	49	90	2	10
LIX1	-1.81343	1.36e-08	3717	3172	896	617
MEGF10	-2.25292	6.61e-06	144	173	23	23
ADAMTS19	-2.03809	1.92e-06	311	255	48	51
C1QTNF2	-1.81224	5.11e-05	195	246	53	40
GABRB2	-1.26673	0.0303842	61	78	26	16
HMGCLL1	-3.1121	3.55e-08	162	148	6	15
CYP39A1	-1.91471	0.0230227	28	16	3	2
IRAK1BP1	-1.21517	0.00212411	377	331	154	84
PRSS35	-1.536	3.17e-05	5140	4363	972	1422
RSPO3	-2.68787	1.65e-10	552	361	69	34
VWDE	-3.02486	0.00051279	30	22	0	1
SSC4D	-2.57864	7.59e-14	1389	1547	195	171
DIAPH2	-1.26655	0.000194926	960	911	356	250
HTR2C	-1.78459	0.0362073	19	23	1	4
IGSF1	-1.56902	2.72e-05	487	572	153	120
GPC3	-1.69998	1.78e-05	4217	3673	624	1107
STAR	-2.07861	6.4e-09	930	719	152	138
TERF1	-1.09384	0.000940589	5685	5219	2633	1435
SLC39A4	-5.06796	1.21e-26	497	496	12	6
NFIB	-1.91596	2.3e-08	8423	5010	1640	1068
AUH	-1.24975	0.00178358	442	415	195	89
CRB2	-4.33446	6.17e-17	257	630	17	10
HMCN2	-3.73385	9.07e-20	569	792	38	33
LRRC4C	-3.00542	1.53e-19	2106	2150	219	175
TENM4	-1.83074	1.18e-06	1644	2062	329	436
NCAM1	-2.73962	1.94e-08	622	983	42	113
ADAM33	-1.4662	2.45e-05	788	770	249	186
EML3	-1.32346	0.00352611	223	462	131	81
DUSP15	-1.96366	0.010654	28	42	8	2
TM7SF2	-1.25202	0.000273554	1411	1646	630	384
DOC2A	-1.26789	0.0300853	67	100	18	30
CNKSR2	-1.32424	0.00174416	524	311	179	79
CNTN5	-3.20657	1.09e-16	881	786	56	70
PCDH15	-3.78665	4.91e-07	60	71	0	3
ADGRL3	-1.24087	0.00146627	409	385	171	92
FAM124A	-1.07178	0.0388005	112	126	64	24
ADRA2A	-3.42254	2.98e-11	222	214	9	16
FREM2	-2.95124	3.8e-17	1324	1547	163	114
FOXO1	-1.81833	3.11e-08	6141	7092	1801	1128
GPR158	-4.51646	3.92e-24	485	502	17	11
CACNA1C	-1.24596	0.000285579	1148	1392	473	362
ANK3	-2.10378	5.49e-10	5773	4049	1123	632
SLC2A13	-1.13697	0.0232441	150	167	85	28
GXYLT1	-1.2664	0.00014159	2318	2183	936	542
THRSP	-2.18648	0.0124185	36	8	2	1
CCDC3	-1.84789	0.0098049	28	61	9	6
ADAM8	-1.16531	0.00425939	260	322	118	83
ZNF385D	-3.90003	4.96e-22	683	540	30	26
GABRA2	-3.22211	7.1e-18	759	786	63	56
RBM46	-3.35401	8.95e-05	30	32	1	0
AP1S3	-1.37742	0.000111953	639	696	225	172
TMEM56	-2.47594	6.16e-08	219	330	42	29
ASTN1	-1.85015	0.00364392	62	64	9	13
ARL11	-1.88821	0.0378827	8	9	0	0
GRIA4	-5.04599	4.5e-37	1365	1230	22	29
CNTNAP4	-2.99525	6.66e-05	45	50	2	3
RAB3C	-3.5868	7.79e-12	264	179	8	14
NRSN1	-1.94781	0.011373	38	27	6	3
CPB1	-3.75934	6.62e-06	58	27	1	0
LGI2	-2.17142	7.59e-06	194	269	55	21
SYCP2L	-1.18828	0.00475201	344	248	136	66
MERTK	-2.08328	2.1e-06	230	255	49	35
SLC25A27	-2.41066	5.09e-07	219	157	27	22
LPCAT1	-1.61227	0.0451845	7	65	7	6
C16orf89	-2.71057	6.61e-06	104	82	8	9
LURAP1L	-1.45893	0.00726191	244	102	28	56
LGI4	-3.04016	9.36e-05	32	54	2	2
HS3ST3A1	-1.1854	0.0124176	297	271	155	43
GDPD1	-1.00366	0.0215698	231	210	118	55
C16orf74	-1.10496	0.00460076	364	426	182	107
DISP1	-1.96603	8.87e-09	1239	1318	263	232
PGM5	-3.32071	1.69e-15	494	496	48	23
CXADR	-1.21551	0.000608439	1162	947	325	359
ADAMTS1	-1.54651	8.37e-07	5195	4735	1439	1179
DKK2	-1.05059	0.00476647	1044	1526	464	488
CNTNAP5	-2.89646	0.00145016	15	20	0	0
PPM1J	-1.01667	0.0229473	169	237	99	58
MIER3	-1.01095	0.0095829	373	453	154	159
ALX3	-3.30054	0.000230274	24	22	0	0
ADAMTSL3	-2.89895	1.61e-14	860	644	72	72
FGF18	-1.71795	0.00106939	100	129	29	21
PPP2R2B	-1.64051	4.6e-06	1300	842	268	246
UBE2L6	-1.8239	6.68e-09	9328	7530	2164	1508
RAB11FIP1	-1.54164	7.08e-06	1026	1141	318	255
UNC5D	-3.65507	1.3e-15	371	306	16	19
ATAD2	-1.07058	0.0049214	1580	1598	875	345
FRRS1	-2.34796	0.00483986	25	27	3	1
SUSD3	-1.73189	0.0180705	30	44	6	7
ARMC12	-2.74036	7.59e-07	116	137	11	13
TSPAN18	-3.16386	3.13e-08	100	248	13	11
DPYSL5	-1.91363	1.58e-06	360	434	93	66
NLRP14	-1.91951	0.023712	19	24	4	1
GPR153	-1.58864	2.64e-05	585	741	165	167
SLC13A3	-1.38422	0.000796546	266	330	107	69
AHCYL2	-1.46021	0.00140584	184	332	86	57
CPA2	-1.87218	0.0124434	46	26	7	4
PPP1R9A	-1.56179	6.19e-06	1013	1050	332	212
DYNC1I1	-1.20102	0.00102826	484	467	183	137
EDA	-1.10069	0.030712	96	147	41	43
ADAMTS4	-1.62387	6.8e-05	292	285	80	61
EPB41	-1.74736	1.79e-06	1480	1082	398	194
TNNI1	-3.25266	9.83e-24	5715	5032	523	324
PTGIR	-2.47275	8.59e-08	246	251	45	20
FNDC5	-3.59773	5.18e-26	3059	3608	206	193
PDE9A	-1.1948	0.000916057	726	684	228	239
LCN1	-2.4562	0.000978565	48	38	6	2
TOR2A	-1.10039	0.00616916	391	613	182	177
NBEAL2	-1.64316	0.00256212	147	379	102	27
PTH1R	-1.28356	0.000699434	723	1113	358	234
MYL3	-1.69489	0.0279457	33	26	5	5
MGAT4B	-1.11932	0.0185617	199	511	161	95
DMKN	-1.71859	1.27e-05	373	359	87	79
FAM171A2	-1.16539	0.0137568	131	213	67	50
SYCE2	-1.13346	0.0399214	101	89	49	17
ALOX15	-2.83519	1.87e-12	703	806	62	86
CCDC42	-1.8757	0.030181	14	25	1	3
PPP1R32	-1.96528	7.53e-08	1254	1131	200	247
PLPP3	-3.00333	1.29e-14	960	1491	144	83
PRKAA2	-1.39686	0.000439592	314	361	106	89
RAVER2	-1.01261	0.00809435	349	396	162	125
MATN1	-1.87976	0.000189431	140	127	26	25
CAMK2N1	-1.08944	0.00147823	952	960	431	277
GBP2	-2.45821	8.86e-12	1437	1107	230	121
GBP4	-3.86583	8.95e-12	270	194	3	14
VANGL2	-1.14398	0.00662295	252	360	104	106
KLHDC8A	-1.58981	0.00265091	132	86	27	24
PKDCC	-1.9515	1.83e-08	3769	4963	850	850
KCNJ3	-5.09323	1.84e-27	518	501	10	8
FRZB	-2.69543	2.56e-17	9915	8266	1084	1000
EN1	-2.49913	0.000596932	36	68	8	2
NOSTRIN	-2.13282	0.0128414	43	9	1	3
CFAP221	-1.74447	0.00344775	110	107	10	31
MSX1	-1.29795	0.00030993	5150	6232	2537	1171
GABRB1	-3.18439	1.34e-14	519	511	56	26
DCST2	-1.32674	0.0107461	100	130	30	36
LMOD1	-2.29742	1.99e-10	1790	1517	351	166
ELF3	-1.71577	0.000654465	410	128	70	46
CADPS	-2.11923	1.51e-08	619	646	107	108
SYNPR	-2.71769	0.000339319	46	47	1	5
ADAMTS9	-2.882	4.68e-18	9651	12553	1247	1010
RBM47	-1.46889	0.000232511	308	334	102	75
IL17RC	-1.16743	0.034864	67	109	33	25
NMNAT3	-1.34563	0.00137284	284	207	85	61
CLDN19	-1.66235	0.00138521	120	115	24	28
NDST3	-2.36108	0.00215122	44	30	5	2
GUCY1A1	-1.67383	3.29e-07	3166	3589	868	755
HPGD	-1.26008	0.0283696	70	85	33	15
NPY1R	-1.99988	0.0191975	24	19	1	3
CDC20B	-1.71496	0.0445994	18	20	2	3
DACT2	-1.82885	6.92e-05	175	208	44	35
TBX20	-1.7438	0.0178004	34	57	3	12
KIAA0895	-2.34215	1.22e-07	264	223	40	29
KCNK5	-1.64144	0.00785885	90	78	9	25
ZNF704	-1.25372	0.000682768	472	520	179	142
PEX2	-1.12224	0.00852051	275	266	80	104
KCNV1	-3.81931	4.21e-08	82	81	4	1
FREM1	-2.19115	1.28e-08	487	417	84	63
GKAP1	-2.53272	3.92e-05	80	80	10	7
SVEP1	-1.61643	0.000109391	285	389	83	81
CFAP47	-2.11268	0.0205262	7	21	0	1
KIAA1958	-1.63905	9.92e-06	823	899	288	145
STRBP	-1.10571	0.000929007	2525	1794	952	617
SLITRK5	-3.10428	9.37e-08	157	177	22	3
LRFN5	-2.35141	5.64e-06	164	145	16	24
SLC16A9	-1.13413	0.00272215	384	369	146	118
GJB2	-3.33858	2.92e-07	128	79	2	8
TMEM63C	-1.6532	0.00750413	74	153	11	35
AMER2	-1.86182	0.0169979	33	33	2	7
ZNF503	-1.40032	0.00079571	1060	629	366	134
FRMD7	-2.33119	0.0038709	35	42	0	6
STOX1	-1.54433	0.0309752	37	37	10	6
SLC39A2	-1.06049	0.00130714	1315	1155	529	395
ZNF219	-2.12707	0.000106798	92	200	30	17
CLMN	-1.59565	8.37e-06	727	612	206	135
PDZRN4	-4.83948	6.32e-26	935	896	35	7
NELL1	-1.27746	0.0135428	156	150	29	59
CACNB2	-1.54343	7.23e-05	469	336	112	95
ADAMTS15	-1.02695	0.00577736	770	885	435	215
CYB5A	-2.32152	7.33e-07	248	166	32	26
PPFIBP2	-1.37768	0.000336652	1864	2337	488	707
WDR72	-2.68461	4.4e-05	92	54	9	4
PRKCB	-3.29212	1.75e-17	647	653	48	46
ATF7IP2	-2.17328	4.83e-07	847	639	192	59
ACSM1	-2.28944	8.53e-06	134	145	20	19
MARF1	-1.3664	0.0454079	29	81	22	8
RBPMS2	-1.24398	0.000535686	853	883	266	289
TAC3	-2.05501	1.39e-06	308	337	78	39
CCDC178	-2.03465	0.0155575	31	17	4	1
PBX3	-1.90892	4.3e-09	6662	6836	1756	1047
C15orf39	-1.88657	1.34e-07	3305	4981	880	818
IGF2	-2.33378	0.00197294	24	63	6	3
ZNF226	-1.08091	0.00148412	5181	3805	2195	1169
CDT1	-1.05962	0.00360696	1046	1510	596	377
TRAPPC2L	-1.15127	0.00342235	370	314	152	88
ZNF641	-1.0786	0.00154955	2016	2204	747	783
CORO6	-1.44283	0.000334668	426	590	193	100
TMIGD2	-2.11017	9.16e-05	112	117	24	13
SEMA6B	-2.09917	0.0117966	15	35	3	2
TRPV3	-1.85349	0.00131743	75	94	18	14
KLK5	-1.81611	0.0475715	11	11	0	1
RCOR2	-2.37214	2.18e-05	99	130	20	10
TMEM88	-2.02483	2.4e-10	5971	5384	1325	834
TRANK1	-1.15306	0.00826154	312	365	87	136
FAM83B	-3.06399	2.69e-05	63	55	1	5
PXK	-1.09285	0.0011563	1285	1152	553	347
HIST1H1E	-2.79205	0.00177323	7	39	1	0
ACOX2	-1.34357	0.00397653	420	377	68	152
DEGS2	-2.41656	0.0074893	19	14	1	0
BDKRB2	-1.97524	0.00148351	85	102	7	22
MYL1	-1.79821	0.0341658	31	20	7	0
CHRM1	-1.99779	0.0228998	18	17	2	1
COL3A1	-1.07803	0.00101684	18791	22138	7634	7350
GFRA2	-1.98168	1.74e-05	335	324	40	75
LRP1B	-2.87047	1.9e-09	254	255	18	28
PKIG	-1.04063	0.0432613	98	102	47	27
NPNT	-2.5248	6.63e-14	1622	1348	212	173
CXXC4	-2.35475	0.000228739	77	60	8	8
ROR2	-1.32271	0.000834031	417	543	138	151
DHRSX	-1.10606	0.0357928	118	75	38	28
SLC25A6	-1.06869	0.0011607	2296	2183	832	809
FAM110B	-1.02277	0.00114326	4269	4188	1860	1405
RSPO1	-4.15288	5.28e-12	180	145	2	7
NR0B1	-3.26239	3.74e-14	510	322	36	24
STK32A	-1.908	0.000140275	180	143	45	18
C22orf15	-1.86413	0.00243686	69	67	16	9
NPR1	-4.41647	3.43e-24	850	1070	20	37
RASSF6	-1.65496	0.0337605	34	26	3	7
CD52	-2.77624	1.54e-06	121	104	15	6
BNC1	-2.47848	6.18e-10	1406	1695	150	241
FASN	-1.04014	0.0174103	794	1840	702	329
LINGO1	-1.60485	0.000283317	226	274	55	65
ZFPM2	-1.58348	2.41e-05	667	683	233	119
RNF150	-2.12062	1.33e-09	1160	1234	208	203
SEMA3E	-1.99886	6.27e-08	562	562	120	92
GPRC5C	-2.13444	1.63e-11	14635	16278	2986	2397
LONRF2	-1.4429	0.00558128	124	144	26	43
SERPINB9	-2.0377	3.22e-10	11073	7570	1902	1527
IRX2	-1.171	0.00609582	268	279	131	60
DLGAP1	-2.99211	2.6e-14	669	521	70	39
SYT9	-1.80051	0.00312779	57	91	18	11
KCNS3	-2.66674	1.71e-08	232	183	25	20
FSHR	-2.18598	0.000735082	78	50	9	8
MTSS1	-1.08839	0.0288057	136	99	40	41
PLAC1	-1.58421	0.000246586	215	242	63	51
HS6ST2	-1.07767	0.00536569	340	357	133	120
XKR6	-1.68582	0.000126748	209	281	60	53
ALK	-2.24468	0.00105798	48	57	8	5
NRTN	-2.29275	0.0124363	10	13	0	0
FUT3	-4.84534	2.53e-12	184	87	1	2
GRIK1	-1.77869	0.00226521	91	80	25	10
TMEM37	-2.26874	2.07e-09	897	658	161	83
UGT2B7	-5.52751	1.85e-38	1062	872	13	13
LRG1	-1.73908	0.0101115	35	77	9	12
KCNK3	-3.04409	1.01e-17	1106	1217	124	85
PDE7B	-1.00429	0.0227906	175	223	97	58
PTGER4	-2.27065	8.37e-07	213	376	48	40
P2RY6	-1.28653	0.000504102	744	605	195	219
ANO5	-2.1836	0.000413	81	67	14	7
KNDC1	-1.40718	0.000433242	316	352	98	92
MLLT3	-1.26257	0.000147382	1540	1257	477	417
AQP4	-4.19156	2.43e-19	398	391	11	16
GAP43	-1.45321	1.04e-05	5871	6066	2198	1246
ID4	-1.04584	0.00409672	724	525	294	179
MACROD2	-1.96594	2.09e-05	231	187	53	26
CERS6	-1.2941	0.00106475	323	357	131	84
SYNPO2	-1.85589	8.07e-09	5500	5013	1401	858
CARNS1	-2.42164	1.46e-06	667	777	39	133
RND1	-1.45062	0.000473427	1119	463	261	172
RAB37	-2.08696	0.0116112	24	25	3	2
BNC2	-1.25749	9.55e-05	6573	6936	2239	2109
LRRN3	-4.02622	1.56e-34	3533	3376	182	128
PARP14	-1.21576	0.000335603	3153	2455	1235	671
ZNF483	-2.04836	4.46e-05	137	152	31	19
PPP1R3B	-1.59014	4.07e-05	382	411	107	92
STOX2	-1.03239	0.00534408	527	484	185	191
NDNF	-2.32617	4.47e-11	1343	963	177	162
DAB1	-2.32889	0.000539707	60	53	7	6
CD7	-3.14726	0.000144718	36	35	0	2
HOXB2	-1.21076	0.00214877	543	387	210	104
2021-03-03	-2.40656	3.69e-10	2159	1063	224	212
CNTNAP2	-1.30465	0.000258925	915	1226	376	297
IGDCC3	-2.05336	5.02e-10	11117	13787	2395	2159
KIAA1551	-1.38779	2.45e-05	1530	1491	490	401
PABPC5	-1.05805	0.0128191	259	230	80	95
FAM241A	-1.29142	0.00841905	161	106	49	32
DENND6A	-1.24951	0.0112347	111	183	52	41
PTDSS2	-1.02276	0.0233094	554	377	109	218
ASPHD1	-1.27782	6.52e-05	3691	3442	1402	910
DSG4	-2.06231	0.0240781	4	16	0	0
GAL3ST3	-2.10033	0.00717146	24	48	2	6
CHST1	-1.43374	0.00214533	147	208	53	45
PHYHD1	-2.0709	1.07e-09	2309	2212	537	297
DPP10	-1.66898	0.000135745	384	278	60	88
LIPT2	-1.01352	0.017172	383	336	206	78
LONRF3	-1.54232	0.0393586	22	45	8	6
RMI2	-1.28151	0.0020989	242	233	81	67
TSPEAR	-2.36447	0.00718327	14	25	1	1
LRRTM4	-2.29128	1.39e-05	225	136	40	12
RIMS2	-1.19534	0.000708653	2173	2332	1056	516
CCDC121	-1.73404	0.0128545	52	35	9	7
FUT2	-1.09658	0.0238387	126	119	53	34
DSCAML1	-1.99777	0.0116894	30	28	3	4
SOX12	-1.10968	0.00183311	2063	1250	584	575
ZNF620	-1.55272	1.88e-05	606	532	158	136
LCN15	-2.1117	0.0153401	18	20	2	1
LCORL	-1.32358	0.00121202	527	531	241	94
PRSS36	-1.05878	0.0321156	107	122	47	36
SLITRK1	-1.72768	0.0429986	24	15	2	3
SHISA3	-5.06631	1.3e-32	904	671	17	13
DNAJC22	-1.32574	0.00013164	962	914	290	280
ERBB4	-3.57454	8.63e-20	637	672	40	37
CSRNP3	-1.51857	0.000111839	355	383	101	93
ZNF713	-1.11556	0.00715482	308	310	153	72
RPP25	-1.7313	3.75e-05	285	276	61	63
RFLNA	-1.51394	0.000169907	384	511	158	86
ERICH3	-3.03829	0.000527684	16	35	1	0
CCDC89	-2.63298	0.00316926	13	27	0	1
FAM133A	-1.20629	0.0451755	67	89	40	11
TMTC2	-1.40084	0.000117385	589	542	169	156
TMEM151A	-2.42023	3.06e-07	219	374	55	26
HLA-DQB1	-1.69316	3.27e-06	580	605	160	120
GPC5	-2.14393	0.00069232	81	66	7	13
SLITRK4	-1.05856	0.00506484	509	393	164	164
AKAP5	-1.26061	0.00314562	272	317	132	61
ITLN1	-3.57781	1.06e-06	64	63	1	3
NRXN1	-3.39102	1.13e-16	700	785	73	30
2021-09-01	-1.20656	0.00662465	1488	767	593	177
FGD6	-1.09648	0.000983591	1319	1317	580	390
PLD5	-2.61298	8.36e-08	204	188	19	24
ALX1	-1.67235	1.7e-06	886	803	248	161
C11orf71	-1.33087	0.00018513	687	557	216	164
SERTM1	-2.11041	0.0184233	8	25	1	1
GAS1	-2.54361	3.86e-10	570	542	100	43
PRF1	-3.70533	8.13e-06	43	38	0	1
AGTR2	-4.40727	2.67e-08	93	43	0	1
OR51E1	-3.36472	0.000166944	31	18	0	0
PSMG4	-1.11908	0.00168869	601	638	262	184
SCRIB	-2.18868	0.000470796	56	94	12	9
CHRM2	-2.42612	1.47e-08	281	313	45	35
PENK	-3.83558	4.77e-32	6595	5036	358	240
HIST3H2A	-1.08573	0.00571564	580	884	359	191
TMEM132C	-2.95393	2.35e-08	178	182	10	19
UTS2R	-1.81351	0.0454068	6	10	0	0
ZNF467	-3.55246	1.82e-12	206	294	19	9
SOX2	-1.28927	0.0307051	55	80	25	15
ZNF678	-1.52689	0.000501661	220	283	87	47
OR8D4	-3.47344	9.36e-05	30	22	0	0
MAB21L2	-2.28402	6.76e-10	696	858	128	110
SLC2A4	-1.12858	0.022505	131	102	48	32
MGAT4C	-3.17244	7.22e-07	96	94	10	2
TMEM259	-1.33938	0.00768042	156	404	118	54
UNC5C	-1.90665	1.17e-06	396	356	85	65
UBA7	-3.56208	1.14e-20	1769	2265	102	135
GABRG3	-4.44832	1.78e-25	586	648	18	19
FIGN	-1.076	0.00167706	1173	1414	522	434
IFNL1	-2.35002	0.00952129	21	11	1	0
OTOL1	-4.13122	1.48e-06	36	44	0	0
TSHZ2	-2.49898	1.25e-12	1064	858	148	106
EPHB3	-2.36713	4.37e-12	3197	4292	622	480
HOXB4	-2.0847	1.39e-07	682	561	90	120
MTA1	-1.33148	0.00979537	136	277	95	33
ZNF662	-2.11387	0.0206278	18	9	1	0
PCP4	-1.86309	3.74e-05	303	229	78	32
CSMD1	-1.33867	0.0384928	52	60	10	19
CABCOCO1	-2.00342	0.00302363	64	46	6	10
GBP6	-2.16805	0.0179722	9	12	0	0
GRIN2A	-3.84507	6.86e-21	554	562	33	21
KCTD16	-1.56974	1.25e-05	1163	1008	252	292
KCTD8	-5.80625	3.56e-21	289	321	0	4
OLFML1	-2.09629	5.24e-08	858	745	116	154
MAATS1	-1.84169	0.0446496	15	7	1	0
LRRC55	-3.48877	3.55e-05	34	36	0	1
DNAH2	-2.51334	6.74e-05	82	75	6	10
ST6GALNAC3	-1.70103	4.25e-07	2640	2895	642	646
PCDH9	-1.6671	2.4e-07	3573	2715	871	649
HIST2H2AC	-1.76324	0.000133187	220	153	46	34
PRKD1	-1.43123	2.73e-05	5481	3413	1564	986
CCSER1	-1.81386	0.0220026	28	28	3	5
SLIT3	-1.49961	0.000127242	3750	5481	977	1428
KCND2	-2.45769	0.000272445	41	98	10	5
CCR10	-2.1658	0.00250215	51	41	4	7
FOXO4	-1.16962	0.00266691	394	551	175	149
PROS1	-1.71158	1.87e-06	756	671	167	160
FAM19A3	-1.27219	0.00838387	137	134	54	31
OSBP2	-1.52705	0.000787063	181	170	54	37
H1FX	-1.34315	0.037117	54	155	53	9
RBM43	-1.16063	0.0285277	80	139	45	29
TCEAL2	-1.31581	0.041759	67	72	35	6
CLCNKB	-1.65711	0.000815008	124	152	37	27
LCN12	-2.02272	0.00540132	44	36	6	5
WT1	-5.72409	4.23e-48	2029	1623	20	24
ROBO2	-1.47199	1.54e-05	1216	1328	431	285
SLC24A3	-2.67521	4.96e-08	177	185	23	16
FLRT2	-1.67468	9.36e-08	8654	8696	2277	1902
ADSSL1	-1.33977	0.000250218	595	618	235	140
IFITM2	-1.16144	0.000229234	5774	5946	2392	1723
METTL7A	-2.64802	2.23e-09	1659	750	208	72
ROR1	-2.40981	2.85e-13	4618	5665	831	640
DLK1	-2.04018	1.76e-10	23828	27904	5582	4113
LSAMP	-2.57441	8.24e-16	7468	6232	1071	682
INKA1	-2.33573	1.75e-12	2024	2118	369	257
PMEL	-1.50246	5.61e-05	864	926	211	259
IFIT1	-1.71321	5.14e-05	306	224	64	55
NAT8L	-1.88882	1.54e-05	243	374	75	50
NPAP1	-2.83416	0.00046028	68	15	2	2
TRIM69	-1.30744	0.0137234	153	84	49	22
SLITRK2	-2.09897	0.00179759	106	32	11	8
LEMD1	-3.02767	8.48e-11	292	266	34	14
UBL4B	-4.1553	1.23e-06	47	35	0	0
NAP1L3	-1.21799	0.000326859	1053	1142	408	325
CD300E	-2.39593	0.00635914	17	26	0	2
BTN3A2	-1.52515	8.6e-06	1207	1187	320	311
PCLO	-1.72307	6.33e-06	802	751	253	114
CLCNKA	-3.23491	6.9e-07	101	100	11	1
SPIN4	-1.35375	0.00243263	176	235	65	56
EMID1	-2.01419	3.01e-06	247	313	61	42
RHD	-1.27752	0.0225423	104	81	42	15
LYPD6	-1.23078	0.000150802	1882	1764	652	549
BCAM	-1.54437	0.00200738	119	231	46	42
WDR86	-1.33416	0.00167473	284	450	107	112
MAGI2	-1.72788	5.47e-06	557	581	173	93
MYMK	-2.29163	0.0124782	9	14	0	0
C2orf88	-1.99753	0.00248359	46	100	7	15
SLC18A3	-3.11231	4.13e-18	3936	6095	467	388
LIN28B	-1.21141	0.00574605	221	208	63	74
TMEM72	-4.39151	2.82e-11	140	104	4	1
RINL	-1.14015	0.0122697	162	175	75	43
RAB42	-1.08977	0.00829395	248	245	111	69
COL4A5	-2.25536	9.16e-08	552	984	106	126
SMTNL2	-3.68687	1.68e-25	1406	1509	98	67
NCR3LG1	-1.1005	0.00781541	304	232	124	70
NCCRP1	-4.44121	2.15e-25	1461	1441	73	20
OPTC	-2.24794	0.00501789	19	44	3	3
ADRB3	-6.43693	5.5e-18	246	177	0	0
SKOR1	-1.95948	0.0316278	6	12	0	0
PRELP	-3.36376	1.08e-25	4727	4269	387	265
ENTPD8	-2.17517	0.00341178	37	41	4	5
BEND4	-2.97897	8.06e-05	51	47	1	4
LIPI	-2.08007	0.00179709	48	72	13	5
RELN	-2.98591	8.33e-13	1283	2082	116	177
PRSS48	-2.71057	0.000105375	49	65	4	5
IL1RAPL2	-2.38881	0.00301217	24	37	3	2
PCDH18	-1.29276	0.000435444	967	1160	304	351
MAOA	-1.44534	0.00529303	102	116	36	23
FHIT	-3.51387	5.81e-15	405	312	29	14
MMP23B	-1.70629	0.00593586	63	66	18	9
FAT4	-1.20045	0.00117757	650	441	209	155
GREB1	-1.59336	0.00012254	269	313	89	58
SRGAP3	-1.88416	1.18e-05	306	280	51	63
ELAVL3	-1.65109	0.0288286	49	21	9	4
SLC35F1	-1.98818	1.93e-06	1030	638	113	181
CACNA1H	-1.00256	0.00905946	483	731	271	204
DAPK1	-1.67531	4.33e-06	2567	2441	487	664
ZNF100	-2.20842	0.000280938	94	112	7	20
HIST1H4C	-1.17534	0.00317677	1731	2390	1069	406
LRRC8B	-1.03249	0.032261	154	183	94	36
NEK5	-1.05079	0.00615672	456	329	151	137
PIWIL2	-2.62846	3.18e-05	80	74	10	5
HIST1H4J	-1.89074	0.00430425	58	75	20	4
DACT3	-1.73364	6.8e-07	1663	1696	518	273
SSPO	-2.76558	5.96e-05	45	83	5	5
COL4A6	-2.48684	7.13e-15	10310	9218	1323	1272
HOXA4	-1.52149	0.00279278	132	119	44	21
BCO2	-2.73895	5.57e-12	703	456	62	61
ELOVL2	-1.23344	0.00198333	720	382	224	135
SULT1C4	-1.13536	0.00390981	327	391	130	120
NUP62CL	-1.67019	0.000473136	276	157	40	55
HOXC4	-1.92853	0.000495714	128	89	28	12
NTRK1	-2.449	8.02e-08	256	434	42	47
PLN	-1.87806	0.0386859	18	10	2	0
CCDC69	-1.59162	0.000149227	362	298	70	89
RYR2	-2.48424	3.99e-11	808	581	92	88
RCSD1	-2.33625	0.000425859	48	81	7	8
RASSF9	-1.21644	0.0466967	66	51	23	13
MAGEB3	-3.22695	5.67e-06	60	66	2	4
CHAMP1	-1.27571	0.00582048	193	352	118	58
NOS1AP	-1.65665	0.00969874	59	52	12	11
SOWAHA	-2.72866	0.000694712	30	38	3	1
C1orf53	-1.03128	0.0203867	313	330	188	64
RBM20	-1.39977	6.63e-05	895	787	245	238
FOXO6	-1.52746	0.0415789	17	59	8	8
NHSL2	-1.70958	3.83e-05	352	555	133	80
TMEM235	-2.90054	4.77e-06	100	108	3	12
MALRD1	-1.96928	0.0197499	38	13	1	4
AARD	-1.78046	0.00195783	91	77	22	12
PKHD1L1	-5.77415	1.06e-13	100	160	0	0
TMEM170B	-1.65391	0.0034509	91	100	32	12
NT5M	-1.14252	0.00861861	258	406	160	78
CFI	-1.97675	2.66e-09	2220	1647	422	323
SMIM11A	-2.03686	0.000140107	360	187	81	16
TECRL	-5.2687	7.02e-28	718	503	15	4
DPF3	-2.44669	1.93e-11	1268	1003	209	107
DOK6	-1.17162	0.00210964	466	445	206	112
ZDHHC11B	-1.62639	4e-05	527	344	133	81
COL6A6	-3.82396	6.97e-19	694	453	23	30
SIPA1	-1.20246	0.0232402	83	158	38	39
EMP2	-2.10199	2.82e-11	5385	5100	1108	771
NEURL1B	-2.51469	0.00519982	15	20	1	0
SYCE3	-1.50462	0.018494	52	59	18	9
CEBPD	-2.7795	6.21e-08	539	793	121	20
ARIH2OS	-2.04195	0.00283912	48	53	10	5
FXYD7	-1.5378	0.00228493	154	116	47	22
TINCR	-1.2749	0.0453716	48	54	15	14
HBD	-6.02786	2.79e-15	139	169	0	0
NDUFAF8	-1.14541	0.0121295	176	253	102	50
PRRT4	-3.11112	2.04e-15	592	779	66	49
NTF4	-1.14279	0.0027773	360	387	150	112
AKR1B15	-2.07566	4.64e-05	190	150	20	34
ANKRD18B	-1.10006	0.00620615	587	538	300	119
ZBED9	-1.48462	0.0284356	66	31	11	11
UQCRHL	-1.17931	0.0235875	182	136	86	23
TMEM229A	-2.76949	0.00116755	29	23	1	1
SMIM1	-1.29639	0.00461761	280	311	143	47
PAGE2B	-2.66811	0.00352864	15	15	0	0
APOBEC3G	-1.13835	0.00630924	292	206	103	70
C1orf226	-1.0784	0.00867693	248	310	124	82
ARHGAP8	-2.14848	1.55e-07	401	459	98	49
INMT	-1.56981	2.39e-06	6109	4306	1706	1020
PEG10	-2.50121	1.79e-15	11600	12060	1861	1330
CCDC169	-2.31101	0.00366025	42	43	0	7
STRC	-2.06752	7.1e-05	136	115	26	16
PCDHAC2	-1.73694	2.19e-05	403	506	90	110
UPK3B	-3.68814	1.26e-14	353	268	23	9
RTL9	-1.53031	0.0154971	74	44	14	13
USP51	-1.19999	0.00182273	429	554	167	160
HS3ST5	-2.18162	1.56e-06	252	223	52	25
RNF103-CHMP3	-1.98916	0.0161276	28	23	5	1
FAM218A	-1.53134	0.000896992	188	152	45	41
GPR162	-1.08213	0.0163377	154	193	69	56
SELENOP	-1.49328	0.000881548	308	216	55	78
TMEM200B	-1.30039	0.0059299	136	216	61	47
SERPINE3	-1.78455	2.12e-05	314	257	60	61
PCDHGA8	-1.68485	0.0465082	27	27	0	7
PCDHGB4	-2.10465	0.000314694	79	154	13	22
LYN	-1.11113	0.00145678	1877	2287	989	549
PABPC4L	-1.20652	0.00465392	240	271	114	59
RTL1	-3.26332	0.000281683	13	33	0	0
STX16-NPEPL1	-1.87138	0.011321	30	45	8	4
FPGT-TNNI3K	-2.13447	0.00445626	48	28	5	4
SMIM6	-2.11255	0.0153642	16	22	2	1
HOXB7	-1.90609	6.05e-07	550	494	137	76
SERTM2	-4.73988	9.58e-11	88	109	2	0
ANXA8L1	-2.52544	1.17e-12	1198	867	157	110
ANXA8	-2.49559	1.69e-13	1856	1437	231	202
C17orf113	-1.01216	0.0406392	108	117	51	34
CSAG2	-2.08173	0.0224953	20	8	0	1
TRABD2B	-1.86255	0.000249583	125	133	31	20
CCDC194	-3.32359	4.41e-08	159	111	14	2
C2orf15	-1.10272	0.0349028	105	83	38	27
ZBTB8B	-2.29564	4.25e-07	476	224	65	37
MLLT6	-2.41778	0.00312548	82	9	6	1
DACH1	-1.3575	7.33e-05	884	824	292	223
HIST1H2AE	-1.87319	0.0011916	77	115	26	11
SSTR3	-2.59661	0.00141531	47	21	1	3
AC114490.3	-1.41816	0.00380061	150	214	75	30
AP000646.1	-1.95929	0.0316643	9	9	0	0

## Sheet: WT
Gene_symbol	log2(WT/KO)	pvalue	LNC1845KO PGCLC rep1	LNC1845KO PGCLC rep2	WT PGCLC rep1	WT PGCLC rep2
C1orf112	1.03357	0.0348304	166	154	146	372
CFH	3.2086	5.33502e-17	99	63	847	498
STPG1	1.06776	0.014197	222	203	252	456
LASP1	1.85269	9.79648e-05	2135	2371	3164	10126
SNX11	1.37401	0.00150026	1113	802	1224	2699
CYP26B1	1.97352	5.26298e-05	55	37	125	184
DBNDD1	1.77613	0.000143793	59	106	204	281
CFLAR	3.42004	6.53821e-23	109	110	1155	902
CAMKK1	1.21255	0.00260351	166	218	333	397
CALCR	2.17121	0.00650085	6	2	20	27
FAM214B	1.16569	0.00361554	943	1070	1319	2279
PRKAR2B	1.16717	0.00354505	129	110	270	181
MSL3	1.00542	0.00855768	536	544	708	1018
CROT	1.39762	0.000295953	296	228	483	631
ABCB4	1.30625	0.0198702	34	23	68	56
IBTK	1.0712	0.0169459	690	834	747	1783
REX1BD	1.67151	5.6612e-07	692	695	2366	1389
CRLF1	3.06648	3.72475e-16	358	484	4489	2010
TNFRSF12A	2.10219	3.37117e-09	3180	3112	16573	7226
ETV1	1.1128	0.012673	124	86	156	211
AGK	1.38244	0.00244286	268	176	295	628
ALDH3B1	2.88067	1.1712e-06	25	13	68	201
CCL26	3.70053	8.0858e-16	26	25	471	194
FARP2	1.28779	0.000881926	1492	1254	2011	3311
TBXA2R	2.67596	1.42972e-11	101	83	722	342
PAX6	1.70015	0.00787357	21	10	65	34
CYTH3	1.02138	0.00184664	979	1066	1812	1576
CYB561	1.02589	0.00186342	709	574	1178	950
NFIX	1.45636	0.00103474	120	151	495	176
CSDE1	1.07785	0.0173524	1507	2229	1836	4430
HFE	1.08396	0.032129	42	60	120	70
MKS1	1.1318	0.00789027	939	740	932	1955
PLAUR	2.67726	1.65855e-11	3735	1464	14087	14119
PPP5C	1.3111	0.00172547	1064	1016	1348	2749
NR1H4	2.70823	0.00309373	0	0	8	14
CALCOCO1	1.03208	0.0125137	2122	1934	2155	4344
UBR7	1.54513	0.0126052	54	58	40	238
MAN2B2	1.31901	0.0052146	289	343	348	916
CLDN11	2.31068	4.95655e-09	2523	1067	10206	5352
MVP	2.4365	5.88476e-08	1441	1957	4479	11045
RNF14	1.3234	0.000825856	1107	713	1394	2218
DNASE1L1	1.26018	0.00146353	950	599	1151	1788
GPRC5A	2.06865	0.00012388	102	131	167	669
MAMLD1	2.45195	6.44388e-06	15	47	144	180
MTMR11	1.57767	0.00509604	95	123	98	444
ISL1	1.3895	0.000500169	446	518	785	1254
IL20RA	2.01364	0.0233518	1	2	13	12
SLC38A5	3.72171	4.47694e-14	30	13	220	318
TTC27	1.1637	0.0088932	290	376	392	803
PHLDB1	1.84555	1.44185e-06	1069	1164	2549	3995
CYP24A1	2.80326	5.54918e-10	546	147	2162	2085
SNAI2	1.52639	1.10969e-05	1317	939	2459	2786
ZFP64	1.31888	0.000291194	658	555	1059	1369
RUNX3	3.52345	6.13829e-14	16	22	241	184
OSBPL5	1.09125	0.0136334	451	515	509	1121
FHL1	1.3386	2.35971e-05	2171	2256	5475	3832
STRAP	1.45578	0.000984913	3269	1390	3524	6608
EHD2	1.12308	0.00142103	3609	4333	6310	7634
FAS	2.055	7.19448e-08	386	258	941	1252
CD44	3.75244	1.29503e-27	776	691	7626	9296
MIPEP	1.61339	0.0009056	116	109	166	398
PRKCH	1.61731	0.0141843	16	30	28	101
IFNGR1	1.68912	0.000297459	1361	704	1483	3840
POU2F2	2.28585	4.80504e-10	137	162	781	492
SLC39A9	1.01392	0.0221572	1027	1042	957	2314
ANK1	2.21879	5.16412e-05	19	57	130	199
BAK1	1.44832	0.00038852	2056	1570	2693	5163
ARHGAP31	1.39485	0.000243414	206	238	452	507
SARS	1.10372	0.000666314	10685	8918	16581	17219
ZCCHC8	1.13049	0.00124546	450	383	725	748
CHPF2	1.0315	0.00430972	945	1287	1753	1953
FUT8	1.00035	0.00567075	939	703	1157	1450
TIMP2	1.40894	8.95119e-06	2437	2641	6510	4706
HOXC8	1.18468	0.00812742	67	89	183	122
MAT2B	1.1403	0.00687916	1581	824	1500	2655
TLL1	2.15492	0.000184709	14	20	72	73
TRIO	1.01894	0.00229352	2658	3514	5754	4574
DNAH5	1.96037	6.17736e-05	36	30	131	99
RAB27B	3.89637	2.69946e-21	39	29	619	341
PARP3	1.87628	8.29611e-06	352	317	684	1317
RETSAT	1.1692	0.00284956	1237	1198	1615	2728
ZIC2	1.6639	1.30449e-06	517	394	1541	902
HSPA5	1.35234	0.000424641	32668	19150	42419	62493
COL9A2	1.05341	0.0132837	208	158	238	367
KITLG	1.40044	4.66433e-05	403	350	1036	635
LTBP1	1.6647	4.70069e-07	4819	5019	12281	13196
ELN	2.29231	0.000121455	11	16	80	54
CLPTM1L	1.16672	0.00110828	713	1077	1856	1497
JKAMP	1.49446	0.000195423	2085	902	3042	3731
DKK3	2.16123	2.47591e-11	4121	4535	16389	15817
HERPUD1	1.65713	4.03462e-06	8383	4997	15553	18480
FSTL4	1.88171	0.0172677	9	2	22	26
OPN3	1.20508	0.0406539	26	34	45	74
PTPRN	1.74438	0.000425979	140	252	309	792
RELT	1.06058	0.011101	106	140	218	208
CUL1	1.30735	0.00586142	588	469	524	1541
TRAF1	2.24256	1.26104e-05	41	78	160	338
DCBLD2	2.11696	5.0251e-11	7867	5318	27528	20247
PRDM1	2.88426	1.36199e-11	236	101	1611	682
LAMC2	2.62862	3.85223e-12	259	215	1027	1424
SEC61A1	1.64728	0.000621443	2108	2775	2945	9488
RASGRF1	2.4098	4.72166e-05	12	15	64	77
DGKG	1.80349	0.00133186	21	22	86	55
TBXAS1	2.6923	2.90303e-07	22	15	110	115
SLC2A3	1.2061	0.000430327	7799	7976	13211	16015
PIGV	1.55357	0.000641078	256	149	318	638
COL11A1	1.73465	2.55422e-07	18407	10855	47166	33676
BCAT1	1.23682	7.5661e-05	5489	4369	10411	8520
HDAC7	1.03052	0.0299705	243	391	311	726
LZTS1	2.644	9.65573e-11	386	523	1784	3040
LTK	2.80659	4.10723e-11	40	42	267	245
ELMO2	1.04562	0.0135098	1302	1469	1464	3047
SEZ6	1.11894	0.0305254	87	44	88	143
SPHK2	1.42879	0.00286336	132	152	187	435
RNF4	1.55192	0.0018768	1961	2108	1967	7630
INTS13	1.02905	0.00423487	1063	666	1335	1477
DLX3	2.52931	4.91813e-09	75	50	269	350
TAF2	1.12358	0.00168291	1891	1364	2484	3150
HIPK2	1.299	0.000671771	2545	1833	3333	5204
EYA2	2.88693	6.49851e-06	4	12	73	62
FAR2	2.25924	2.69391e-08	106	97	353	465
SLC9A3R2	1.5348	6.73066e-05	306	457	850	984
OAT	1.91778	1.7551e-05	2905	1804	4167	10188
TRAM2	2.22086	2.7059e-11	1477	1360	5186	5721
DGKA	1.58765	0.000403008	738	878	1137	2788
MYLK	2.22641	4.53176e-10	398	231	1433	1055
TMEM206	1.11953	0.00229659	935	505	1279	1238
COL17A1	2.61026	1.8872e-05	13	8	65	66
MTHFD2	1.93233	1.38014e-06	1183	1260	2717	4891
PDE4A	1.13469	0.00206816	350	422	652	727
LRRC40	1.3762	0.0238242	64	106	54	316
EML1	1.13089	0.00191555	350	394	629	694
PFKP	1.33835	0.00192946	3862	5038	5640	12379
SP100	2.11203	1.51472e-09	538	324	1700	1409
CACNB1	1.60925	0.000957275	69	68	122	226
STOML1	1.25106	0.000368341	1055	856	1651	1993
PKM	2.63213	4.25271e-09	2652	2936	8106	21147
RHOA	1.09808	0.00232013	5575	3856	6890	9086
NAV3	2.0861	9.34366e-11	604	552	2232	1862
TFE3	1.00136	0.0154516	1793	1942	1977	3907
ACSL4	1.07782	0.00332474	3451	1970	6451	3165
GAL	1.99125	0.00498618	16	5	75	20
HES2	2.22984	0.000563532	7	14	57	47
CLTCL1	1.37135	0.00214602	105	176	251	354
DGCR2	1.09107	0.0142152	1377	1784	1580	3750
WIPI1	1.13264	0.000516213	1490	1301	2492	2447
ASNS	1.58827	4.82478e-07	1593	1513	4152	3535
AP3M2	1.1486	0.000280712	2033	1715	3642	3111
ST6GALNAC2	1.809	0.0121219	8	9	24	38
OSBPL3	1.74166	9.40979e-07	225	176	634	488
WDR1	1.14917	0.00275971	8274	10436	13004	20204
RPS6KA2	1.02473	0.00607467	908	1283	1625	1985
LMCD1	1.06788	0.00716509	2934	1776	2947	4791
TRIB2	2.02931	2.17677e-07	376	287	877	1336
ACTN1	1.04095	0.00290692	12949	14920	20596	25397
LNX1	1.32159	0.0196073	34	40	53	104
CHFR	1.18618	0.00570237	559	544	644	1343
P4HA2	1.37355	5.32958e-05	12547	14267	26357	30022
STK10	1.52546	1.16663e-05	935	1089	2249	2516
CRMP1	2.13553	2.3078e-05	96	180	287	759
AP1M1	1.37106	0.00156995	888	660	989	2179
SDHA	1.34249	0.00202719	3647	2584	3739	8697
PTGS2	1.39842	0.00507777	41	65	170	83
PICALM	1.16564	0.0223631	160	266	197	575
GLI2	1.3233	2.24726e-05	2246	2009	4875	3861
MGLL	2.99759	1.65734e-18	238	297	2165	1569
NTN4	2.74971	3.64198e-12	68	89	461	462
ENO1	1.33201	5.20208e-05	14817	11563	25798	27622
ARHGEF10L	1.01325	0.0170246	280	369	390	659
FNDC3B	1.36098	8.53637e-05	4232	4066	7596	9538
MKRN2	1.07974	0.0127673	1313	1082	1207	2750
UNG	1.7507	0.03828	437	385	514	2920
KLHL20	1.0873	0.00600888	1794	1443	1967	3440
NT5C2	1.22646	0.0206565	222	260	178	723
MCAM	2.53158	6.92042e-08	108	186	470	1009
RARB	1.39426	0.000156755	740	892	1515	1968
IL4R	2.29087	2.01189e-09	242	378	1233	1356
AMPH	1.35653	0.000389154	158	150	328	322
MCCC1	1.03996	0.024332	338	272	288	695
FAP	4.74508	3.0271e-36	83	87	1777	2339
TIGAR	1.00755	0.0188239	109	80	171	143
SYNJ2	1.25729	6.92951e-05	1633	1636	3576	2847
EDN1	2.29769	1.09261e-11	556	422	2609	1521
UBE2D4	1.1816	0.000849179	2124	1197	3072	2986
LXN	1.89596	0.0115611	9	4	31	24
PGM1	1.37322	0.00354239	437	447	479	1348
MOXD1	3.18321	4.58008e-06	3	7	38	76
COL5A3	3.96163	1.14713e-10	7	3	98	91
MPP4	4.24152	8.56744e-15	10	8	137	226
BZW1	1.16157	0.00118512	3653	2778	4889	6529
PLOD1	1.66006	0.000140029	4754	5529	7817	18435
ZNF671	1.98189	1.93969e-06	264	258	605	1089
FAT1	1.39228	3.25986e-05	4219	3195	10691	5721
SSH1	1.38268	0.00187551	494	627	724	1627
COL16A1	1.88182	1.15283e-05	145	152	334	571
KIF3C	1.37635	0.000401291	449	483	781	1170
GCKR	3.98234	4.22961e-07	0	2	47	36
CD59	1.2832	0.000148933	12433	7219	22422	16723
OVGP1	1.4642	0.0428078	11	12	18	43
ATG16L1	1.55197	0.000245385	570	520	845	1719
POMGNT1	1.17771	0.00635746	1868	2074	2165	4887
EPDR1	1.61883	2.09513e-06	314	322	888	737
ERO1B	1.46783	0.00716947	45	21	96	66
HSD17B2	2.58785	3.67212e-07	20	23	156	93
LAT2	1.09594	0.0231225	64	46	113	86
PPP1R15A	1.21232	0.000695361	3296	3881	5872	7525
PGS1	1.17806	0.00558596	297	276	365	667
PTHLH	3.67593	5.71607e-23	178	96	1544	1512
TFAP2C	2.11365	9.75535e-10	1104	805	4704	2425
EDEM2	1.41805	0.00012788	1694	1109	2557	3427
ANKRD10	1.4067	0.00423695	1514	1502	1371	4990
C3orf18	1.06523	0.00264265	323	357	606	558
SMOX	2.02146	1.97705e-07	857	771	2031	3359
SLC4A11	1.78185	0.000305416	47	73	134	220
MAVS	1.0906	0.0148126	1150	1518	1329	3172
PXN	1.43684	0.000229668	622	732	1167	1797
FXYD5	1.06296	0.00315295	245	266	513	374
GANAB	1.12411	0.0108663	3485	4485	4081	9674
PCBP4	1.31601	0.000163336	1738	2365	4156	4236
MUL1	1.37867	0.00176483	1709	1613	1980	4872
DNAJB11	1.10188	0.000894148	3141	2060	4767	4239
P3H2	1.62511	6.71719e-07	1312	1266	3250	3252
AARS	1.19575	0.00565404	3227	3749	3866	8791
NRCAM	1.87807	0.00286585	16	11	54	43
SLC26A4	2.33924	0.000348905	8	11	74	33
DLD	1.28448	0.0035856	1576	1102	1523	3602
CMTM6	1.09442	0.00236609	951	686	1253	1530
SEL1L3	2.53247	8.54346e-15	489	459	2399	2204
TF	1.38699	0.0204558	19	25	51	53
ALKBH5	1.14335	0.000522588	2113	1425	3417	2914
DAZL	2.15054	0.0109769	211	360	614	3067
TBX15	4.65992	8.56894e-33	58	32	1032	1051
MYL6	1.36971	0.000136172	2091	1545	3251	4257
DPYSL2	2.73802	1.80183e-09	2328	988	5937	12690
TGFB2	2.00254	5.49274e-10	1325	1271	4371	4218
XYLB	1.06496	0.0178025	94	96	139	185
UPRT	1.84554	1.31162e-05	227	173	426	747
EPB41L4B	1.44369	0.00438451	41	59	97	135
TBC1D2	2.21211	4.56366e-07	182	225	529	1052
TLL2	1.91421	0.000399373	19	34	112	76
CYP26A1	1.00191	0.0298455	164	69	188	191
IL11	1.86965	4.02134e-05	450	328	2144	506
ITPR3	1.85263	0.000795041	32	88	122	263
JAK2	1.03661	0.00692049	156	168	311	241
PRTFDC1	1.32275	0.00137017	116	88	215	207
PALMD	1.2125	0.0194859	60	31	90	88
GADD45B	1.05065	0.00326882	260	237	492	359
SERPIND1	1.64398	0.0308915	3	13	27	29
SUSD2	2.68563	0.000514252	6	9	7	117
GGT5	2.68113	1.38837e-09	160	119	496	1019
SEC14L2	2.73357	9.4984e-14	306	312	1495	1962
CYTH4	2.04177	0.00590094	6	6	29	28
MFNG	1.85554	0.0235379	4	4	14	23
LGALS1	1.22683	0.000116209	6814	7310	16758	10829
ANKRD54	1.19928	0.00610357	796	797	879	2012
PICK1	1.02509	0.00723553	460	545	700	942
CYB5R3	1.30897	0.000156844	2070	1524	3289	3845
LMF2	1.86458	0.0289768	500	646	816	4803
HMOX1	2.00927	6.6292e-10	770	770	2669	2474
RASD2	2.71094	1.23855e-07	17	38	239	120
APOL1	2.35296	0.00293845	7	1	26	29
MYH9	1.52434	0.000178068	3170	4133	6050	10950
ACO2	1.07979	0.0112325	1398	1604	1605	3406
PRMT5	1.09363	0.00669212	1109	867	1188	2127
COCH	1.34793	0.00898772	49	31	88	86
PYGL	1.0388	0.00125648	1261	1154	2117	1904
TRIM9	1.32896	0.014317	26	44	83	73
GNPNAT1	1.06308	0.00411764	585	326	795	740
ISM2	2.38525	0.000563302	11	9	24	85
LGMN	1.17984	0.000772433	5768	5071	8474	11092
SUSD6	1.02458	0.00279923	1831	1962	2889	3309
GSKIP	1.45221	0.00150314	327	275	385	932
PCK2	2.24408	2.75623e-09	1848	1528	5102	7991
RABGGTA	1.3063	0.000229373	853	1011	1734	2012
GSS	1.10411	0.00121886	5287	3664	7276	8070
MMP9	1.7622	0.000772494	37	63	103	191
PYGB	1.55772	0.000179845	1831	2704	3876	7008
HNF4A	1.70531	0.0080378	21	9	57	38
SALL4	1.31763	0.000148113	576	391	1024	936
TPD52L2	1.82739	0.000277829	343	364	445	1617
NELFCD	1.03166	0.00912759	3536	2991	3744	6721
CTSZ	1.96729	3.6002e-08	359	289	1445	746
SLC17A9	5.04836	3.3698e-26	43	32	692	1740
BIRC7	1.79193	6.5823e-05	62	60	162	196
NKAIN4	2.30093	3.48407e-12	651	594	3334	1945
TRIB3	1.63783	4.27712e-07	1017	1141	3120	2474
SEC23B	1.17349	0.014271	1551	1730	1379	4451
MYL9	1.44066	0.00394786	69	96	122	250
JAG1	1.72917	1.65345e-07	862	958	2584	2407
BPI	2.42274	0.00168989	7	2	21	40
SYNDIG1	1.69115	4.01975e-06	424	374	919	1177
APMAP	1.06017	0.00662778	6505	4944	6888	11831
ZNF516	1.52592	0.00122113	2412	1385	2232	6427
LIPG	1.79577	0.00112911	32	23	68	100
CSTF2	1.37192	0.00187202	214	119	269	424
MXRA5	1.60978	4.70199e-05	188	331	721	630
PIM2	1.19186	0.00467063	309	189	355	550
SLC35A2	1.01859	0.0076506	2112	1638	2318	3655
PGK1	1.56343	6.16714e-06	6833	4731	12698	14824
SMS	1.27694	0.000298945	2117	1448	3145	3758
PHEX	1.62763	0.0344776	7	8	14	35
GABRE	2.46973	2.21643e-10	131	129	531	684
SRPX2	2.63026	3.76509e-13	901	544	3434	4009
DRP2	1.67527	1.54085e-06	262	216	746	534
TAF7L	1.849	0.000872528	24	21	71	76
NALCN	1.91412	0.000164671	26	37	116	99
FGF14	3.10528	0.000138035	1	2	32	22
ACP5	3.192	5.09004e-17	80	108	753	759
DNAJC3	1.21519	0.00243971	9318	3432	14400	9991
FLT1	2.65319	3.4977e-11	481	329	1587	2655
KATNAL1	1.24481	0.000513321	260	223	579	378
CORO1A	1.11734	0.00137157	299	293	598	462
NUP93	1.42229	0.00199078	2002	2015	2225	6340
USB1	1.65619	0.000143838	2160	1419	2754	6246
NDRG4	1.39451	0.026684	56	87	40	278
PLA2G15	1.92176	0.0312312	44	59	66	611
FOXF1	3.23374	7.30765e-11	14	21	181	142
SLC7A5	1.83278	3.56885e-05	1082	1728	2631	5649
SALL1	1.36576	0.000869844	148	195	321	407
PYCARD	1.59373	0.000103606	94	109	341	193
NOMO1	1.61968	0.00407269	65	54	68	238
IL21R	2.43591	0.000139245	7	12	60	50
SYT17	1.44288	0.000511984	88	83	232	164
RNF40	1.02538	0.0372298	670	689	487	1673
AAGAB	1.13911	0.00719051	717	513	717	1411
CORO2B	1.45553	0.0013906	68	89	158	203
GABPB1	1.12026	0.00226132	815	594	1068	1369
SLC30A4	1.09602	0.0163412	99	82	131	183
RIPK2	1.1335	0.00298061	805	515	976	1321
TRPA1	3.49531	5.67596e-06	0	4	56	31
CPQ	1.66966	5.22055e-05	86	88	233	233
NIPAL2	1.53665	0.00161903	39	51	117	110
IL7	1.76052	0.0479864	3	1	18	7
ARMC1	1.10532	0.0074886	581	513	652	1206
GSDMD	1.64094	0.0208491	7	13	44	23
SH2D4A	1.40205	1.26007e-05	1013	868	2443	1683
SLC39A14	1.13871	0.0109131	91	91	143	185
TNFRSF10A	1.96814	6.46614e-08	165	138	611	402
ASAH1	1.41965	0.00320305	494	448	488	1520
BNIP3L	1.02425	0.00145772	1587	1446	2584	2402
KCNN4	4.52509	2.87098e-13	1	8	116	159
NUCB1	1.09292	0.0229178	199	252	218	549
GYS1	1.2367	0.000712788	2322	2425	3712	5240
CGB3	2.74478	0.00111417	2	1	25	17
TUBB4A	1.72429	0.0482004	2	5	3	30
KCNA7	2.65605	1.38872e-05	8	12	81	54
CLPTM1	1.69056	0.000437737	1883	2249	2531	8299
NOVA2	1.99262	0.00103662	51	28	51	225
SGTA	1.44454	0.00418939	372	212	298	966
SLC1A6	3.56801	9.21148e-07	0	6	63	51
GPI	1.21041	0.000161411	10433	7269	18061	15178
EBI3	1.15992	0.037563	50	25	63	78
FSD1	1.0795	0.00154686	1020	1204	1901	1919
SLC1A5	1.51336	6.93043e-05	294	366	689	857
BBC3	1.82829	0.00104651	47	22	74	138
PLIN3	1.44033	0.000191545	5200	3511	7225	11559
GRWD1	1.1367	0.00248976	1745	1593	2301	3519
SIGLEC6	2.06231	0.0188288	1	3	6	24
CAPS	1.28956	0.000878435	579	497	828	1271
ARRDC2	1.72142	2.02886e-05	89	85	260	226
COMP	2.94595	1.90745e-12	50	94	603	419
UPK1A	2.75656	0.000169517	4	4	41	31
TMEM59L	2.08896	7.30525e-09	256	368	1342	951
CDK6	1.36721	1.46227e-05	2788	2968	6814	5436
CBLL1	1.07078	0.0126501	420	377	441	879
STEAP1B	2.51817	0.00202793	1	4	28	20
CAV2	1.07168	0.00092778	2151	1525	3563	2731
CAV1	1.97263	2.54035e-10	2939	2588	10806	7404
MET	1.37927	8.87732e-05	976	857	2760	1318
LFNG	2.43224	1.49234e-07	32	41	175	178
GRB10	1.13269	0.00187571	1003	1309	1862	2245
STX1A	2.12707	2.19226e-08	457	549	1510	2135
GARS	1.14266	0.000432248	7206	7856	13591	13390
TAF6	1.47049	0.0018418	654	604	700	2082
TFR2	1.64508	0.00249798	37	29	68	110
IMPDH1	1.46914	0.000122805	1094	1562	2546	3467
SERPINE1	2.08151	3.14239e-08	3123	4164	10626	14950
C1GALT1	1.46856	0.000698798	243	94	454	329
PLOD3	1.12363	0.00348703	4188	5207	6389	9972
SFRP4	4.16265	2.21288e-19	17	15	269	288
TSPAN13	1.42858	3.01629e-05	495	609	1334	1134
RARRES2	1.24028	0.000129065	1671	1210	3255	2338
PRKAG2	1.49819	7.68389e-05	531	560	1026	1468
SLC1A1	2.14134	6.62628e-07	60	71	347	176
CNTNAP3	1.18527	0.0221654	42	47	123	58
MEGF9	1.14238	0.00124929	289	243	571	402
LHX6	1.68925	0.0392223	5	4	27	11
ENG	2.60697	2.55585e-06	23	32	89	221
GLIS3	2.32831	9.1652e-08	53	65	233	281
HPS1	1.23062	0.00849583	885	821	806	2347
DNMBP	1.40673	8.9244e-05	692	830	1507	1782
ERLIN1	1.10351	0.0163657	594	620	566	1487
MINPP1	1.05124	0.0194531	461	353	400	920
DKK1	1.45826	4.40566e-05	3144	1677	5514	5232
TSPAN14	1.85344	1.41246e-05	1753	1575	3005	6721
TRIM16L	2.36357	4.92427e-09	170	173	579	899
CYTH1	1.21198	0.00196177	629	724	984	1529
CCL2	2.84253	4.54932e-14	906	462	5744	2952
ABI3	1.61244	0.00190862	34	31	86	88
COL1A1	1.42018	0.000182526	69193	96814	149325	211939
SGCA	1.75946	0.000824262	64	29	216	77
ABCC3	2.25277	9.67878e-05	10	36	123	96
SMURF2	2.08228	5.93496e-11	4022	2976	13151	11348
ALDOC	1.30332	0.000124118	400	332	825	661
DCUN1D4	1.20912	0.00178004	1234	895	1516	2378
CHIC2	1.18163	0.00508614	117	114	305	148
KLHL2	1.18537	0.0191458	61	85	97	177
ANXA10	3.98764	4.21684e-15	14	8	203	157
AADAT	1.16118	0.00250882	211	195	343	393
SLC2A9	2.65923	9.78926e-05	11	4	38	66
TBC1D19	1.80436	7.67573e-07	269	193	652	676
NKX3-2	1.36361	0.0107526	31	44	75	92
MFSD10	1.04805	0.00194353	5404	5304	8158	9557
GLRB	1.83428	0.000168856	93	44	158	251
KLHL5	1.01549	0.00152643	1534	1242	2452	2094
CRYAB	1.82732	0.00179737	22	16	59	65
HTATIP2	2.15828	7.57497e-05	21	19	85	81
CTSC	1.07401	0.00220469	984	774	1360	1594
SC5D	1.11776	0.0028823	1237	1045	1580	2344
JHY	1.73861	0.000180318	50	43	167	107
HSPA8	1.42621	0.000489602	8425	8786	12362	24549
ST3GAL4	1.2907	0.00843665	45	47	112	83
CPT1A	1.274	0.000156598	2395	1773	5479	2985
CCND1	2.19672	1.82211e-12	8557	6769	34555	24424
CCDC86	1.6622	1.8376e-06	1224	974	2555	3075
TMEM109	1.14782	0.0026599	4268	3571	5207	8503
FOLR1	2.40277	3.91068e-05	32	8	136	74
BIRC2	1.11536	0.00049818	1755	1393	2958	2570
KIAA1549L	2.64928	2.85191e-10	60	111	493	465
FBXO3	1.18389	0.00176097	748	510	963	1309
SLC1A2	1.60213	0.0393472	4	10	37	14
ACCS	1.3381	0.00431293	113	199	235	417
CARS	1.34355	0.000115324	444	347	1059	627
PSMD9	1.37604	4.38926e-05	527	396	1144	836
SELPLG	1.57554	9.25957e-05	241	267	491	744
TSPAN11	1.39785	0.000124206	703	894	1561	1874
MVK	1.16417	0.012079	324	253	296	723
GLI1	1.96741	1.55388e-05	47	67	182	205
WNT5B	1.09585	0.00081768	676	587	1236	973
SH2B3	2.08382	1.18208e-08	157	128	533	482
CREBL2	1.00874	0.00875919	217	227	338	385
GSG1	1.61759	0.0334905	8	6	30	18
LTBR	1.24496	0.0019684	158	246	398	400
CDK2AP1	1.04305	0.00241448	386	405	795	557
MGP	1.5789	0.024896	10	11	45	21
VDR	1.23175	0.00321603	169	122	238	314
ADGRD1	2.70014	1.3059e-07	24	24	115	171
CPSF6	1.03703	0.0100714	1808	1741	2004	3725
COPS7A	1.30391	0.000617209	4385	2245	5815	7234
USP5	1.26239	0.00566946	2789	3558	3306	8807
ENO2	2.80997	0.000650158	147	122	519	2508
LPCAT3	1.34039	0.00907583	236	148	181	592
NT5DC3	2.11358	0.0079873	643	641	1308	5400
PRKAB1	1.33859	0.00331431	1522	1140	1438	3864
RAB35	1.19266	0.0145473	120	174	167	378
COL12A1	2.10699	2.43487e-10	1081	1275	4327	4148
TDP2	1.24001	0.00117136	636	383	850	1072
NEDD9	1.56596	6.36519e-05	1042	1257	2115	3404
ADTRP	1.99782	0.0159821	3	4	11	27
RIPOR2	1.7404	1.81054e-06	163	147	506	369
SASH1	1.76386	1.18519e-07	646	667	1864	1813
ULBP1	4.27129	1.46866e-17	10	10	243	166
RBM24	2.16537	0.00226629	8	6	46	26
CAP2	1.27367	0.000228268	4535	2576	7370	6550
BAG2	1.07029	0.00112049	923	756	1769	1147
C6orf62	1.58815	0.000153104	18637	9553	23967	43494
HBS1L	1.32487	0.00201645	1025	738	1114	2372
TRIM38	1.9073	1.26288e-06	122	83	350	299
ARFGEF3	1.45318	0.00033377	96	99	264	190
TFEB	1.27966	0.000976634	156	181	334	341
PPP2R5D	1.07155	0.0178982	1050	1254	1078	2738
TMEM30A	1.01672	0.00758813	326	302	446	571
LAMA4	3.88368	1.48465e-30	150	117	2049	1437
TENT5A	1.53801	1.16009e-06	1231	1070	3183	2351
LOX	1.91842	2.20806e-09	2018	2328	7811	5990
CCNG1	1.13766	0.0190778	316	83	355	361
CDH6	2.31801	2.35982e-10	542	707	2352	2873
NPR3	2.44118	8.21907e-12	150	126	679	593
TARS	1.33032	9.1914e-05	3618	3076	6180	7330
FGF1	2.49404	5.39599e-06	17	16	114	69
C5orf15	1.54358	0.00158141	1017	604	888	2868
ERGIC1	1.07618	0.00147127	2494	2492	3936	4499
PDGFRB	1.11417	0.000781237	3615	3890	6379	6744
STC2	3.32225	6.38216e-22	2878	1885	19036	21217
HRH2	1.28529	0.031894	22	22	54	43
DBN1	1.62891	0.000412204	5466	6177	7482	21545
TBCCD1	1.91365	7.8614e-05	136	132	230	607
WNT5A	2.36756	2.0782e-11	3421	1776	12871	9744
PFKFB4	1.85643	8.01207e-06	447	595	1117	1991
COL7A1	3.1018	6.83977e-19	1054	953	6387	8112
GBE1	1.95871	4.34286e-05	249	220	387	1113
C3orf52	1.3242	0.00129709	351	244	456	733
ABTB1	1.33357	0.000430025	677	609	1050	1544
AADAC	3.42309	1.01776e-06	2	5	54	51
VIPR1	2.49545	0.00060451	4	8	71	19
ADAM23	1.20733	0.0022839	145	183	311	315
LMAN2L	1.36624	0.00221436	1538	1303	1632	4159
KCNIP3	2.64248	1.13825e-05	11	13	59	91
ACTR3	1.11451	0.0018702	8784	7462	11678	16211
STEAP3	2.96538	6.01973e-13	103	93	515	799
NRBP1	1.26698	0.00156768	8007	6109	9373	17404
ITGA4	1.33476	0.0006614	226	128	419	321
REEP6	1.52956	3.94999e-05	157	143	396	327
TTC31	1.00682	0.0145247	760	767	841	1577
GRB14	1.93484	1.65862e-06	139	89	344	382
LOXL3	2.5558	0.00226006	1142	1185	3418	18153
DOK1	1.1131	0.00174957	1045	800	1432	1749
EVA1A	2.08853	1.89142e-08	770	415	1984	2165
EFEMP1	1.78584	5.61616e-06	575	382	1058	1610
FN1	1.6656	1.7552e-06	67353	92495	203507	215956
IGFBP5	1.04167	0.00379478	4535	4498	6192	8584
EFHD1	1.32508	9.77549e-05	425	405	1065	678
COQ10B	1.92668	7.24969e-06	181	123	355	594
ST3GAL5	1.38056	8.27351e-06	4166	3604	9345	7271
FHL2	2.52639	4.15774e-15	684	718	3676	3141
MLPH	3.47953	7.58335e-22	343	242	2476	3089
CNPPD1	1.04803	0.00531046	3168	2213	3533	5224
UXS1	1.21362	0.00238478	315	308	459	699
PLEKHB2	1.17348	0.000353856	12808	9575	19884	20610
DLX2	2.34598	7.14863e-12	234	211	1173	769
SLC1A4	2.11072	3.85573e-10	380	382	1401	1341
RND3	1.07712	0.00123567	7501	4591	12060	8757
TRAK2	1.26374	0.000185577	939	927	1753	1874
C2orf42	1.02161	0.0339989	277	277	234	650
VAX2	1.924	0.0233554	1	5	23	13
PARD3B	1.43479	0.000148738	162	185	496	305
FARSB	1.12849	0.0017908	2046	1315	2621	3217
GPX7	1.33422	3.12679e-05	946	873	2218	1581
SCP2	1.04717	0.0253175	104	152	159	271
ERRFI1	1.16071	0.000247632	1629	1348	3152	2311
KCNC4	1.91521	3.20993e-07	159	200	572	568
HDAC1	1.0244	0.0336082	1416	1837	1240	3957
TRIM62	1.9066	2.20817e-05	147	231	416	773
ARHGEF2	1.46762	0.000757975	270	309	434	861
NCF2	3.43043	2.59198e-10	8	15	162	102
WLS	1.0072	0.0109391	2725	2764	3127	5563
CTH	1.68594	3.84484e-05	242	131	438	543
NID1	1.12134	0.0190276	247	489	408	892
MYCL	1.36538	0.0408507	12	17	36	35
UAP1	1.3336	0.000630113	1234	1075	1732	2898
SLC2A1	1.19987	0.000780441	8411	8539	13156	17956
TSPAN1	2.20271	1.55088e-05	39	19	133	109
TNFSF4	1.90526	5.43747e-06	84	58	246	208
RCAN3	1.29037	0.00435543	244	235	293	643
CTSD	1.0564	0.0021274	3588	3439	5251	6417
TREH	2.87491	0.000103812	4	4	25	52
KLF7	2.17518	4.93079e-05	43	61	110	302
TTR	1.89785	7.36379e-07	111	127	397	355
SGIP1	2.06796	3.42723e-09	225	198	930	588
SGK1	2.37447	2.83472e-07	394	427	959	2614
RNF146	1.55614	0.000665556	979	605	1049	2655
CTGF	2.35047	7.03148e-13	4720	3045	18320	14761
TCF21	1.24875	0.000905214	252	196	413	450
DCLRE1B	1.36658	0.00539973	143	121	155	393
RPN2	1.29771	0.000615909	14286	9490	18388	27881
SPP1	1.80687	1.23402e-07	602	428	1895	1152
RARRES1	1.26642	0.0115098	49	44	131	67
MFSD1	2.66317	9.23006e-13	532	391	2029	2833
KLF12	1.31976	0.000188921	327	416	877	674
SATB2	1.78513	4.75974e-05	58	55	201	139
PIGZ	1.29795	0.00816859	47	46	100	95
SENP5	1.01636	0.0080628	6943	3188	7706	8564
TRIM67	2.97306	2.49275e-05	4	5	38	51
TRIM32	1.64095	0.000460321	891	1009	1222	3570
DCAF4	1.56795	8.16924e-05	377	358	676	1085
PGF	3.23723	9.36025e-23	368	311	3472	2132
LTBP2	3.06264	9.99646e-16	247	441	2624	2473
FLVCR2	1.6897	0.0125231	15	9	33	42
GPR68	1.63443	0.00381499	18	34	85	65
CNRIP1	1.33311	6.04413e-05	906	702	2088	1292
ELOVL3	2.45799	1.64601e-05	13	16	98	62
TCTN3	1.07665	0.0115979	1518	1117	1384	2955
GOT1	1.19633	0.000447649	1031	819	1638	1769
INSL6	1.20362	0.0445579	33	17	57	45
CD274	2.40062	4.80391e-05	16	11	94	51
PLEKHG1	1.99234	1.05287e-06	81	67	264	238
SEC16B	1.31847	0.0188707	60	31	61	127
KCNJ5	1.94095	0.0286006	2	2	4	23
TGFBI	1.07871	0.000914225	26746	29133	47541	47936
SOCS2	1.11073	0.00162865	1357	884	1843	2023
DUSP4	2.34513	1.4544e-11	187	203	935	754
PPP3CC	1.01624	0.0161522	202	214	261	412
ECHDC2	1.42611	0.00750748	31	32	79	70
DPPA4	1.44576	0.000770781	221	127	307	458
B4GALT4	1.31744	0.00812718	212	127	182	490
TMEM156	3.92369	8.36613e-09	2	4	65	67
CPXM2	2.26769	0.00341811	1	9	40	26
CSMD2	1.77521	6.57034e-06	106	89	302	261
CXCR4	1.71345	0.00656343	14	15	51	41
FMOD	1.52562	0.0266934	19	56	23	174
ZNF205	1.09369	0.0103085	417	440	492	958
RWDD3	1.43554	0.0145489	24	26	48	71
BBS9	1.05783	0.0125084	261	228	298	510
FAM126A	1.82099	3.69046e-06	1187	480	2896	2056
INHBA	1.86201	2.64075e-09	14090	13244	50963	32758
CALD1	1.26215	5.67709e-05	21417	19866	50463	31964
PLAU	2.97213	4.56263e-19	324	357	2391	2175
SRGN	2.51456	0.00210447	1	4	32	17
CHST3	1.00902	0.0116073	1297	1847	1962	3104
BICC1	2.45857	9.00348e-09	2504	1029	6223	9911
EGR2	2.75296	4.81064e-05	7	25	37	197
P4HA1	1.41779	0.000138779	1625	1528	2710	4039
DDX54	1.02014	0.0171823	1127	1034	1078	2352
BHLHE41	1.74147	0.000545756	63	34	212	85
ACOT9	1.05012	0.00184771	4185	2555	6007	5243
ADGRE5	1.27507	0.0221439	34	57	64	123
ITIH5	1.4911	8.23709e-05	248	336	648	711
ARHGAP9	1.40015	0.0458365	10	13	37	24
MMP19	1.61907	4.79232e-05	478	372	801	1301
KBTBD4	2.17184	4.58046e-05	151	88	191	718
IL13RA2	2.40563	0.00131813	5	4	35	26
TNFAIP6	2.94375	7.38252e-06	9	4	72	45
KCNJ2	1.26405	0.00491128	1240	344	1952	1234
TTPAL	1.19357	0.0121435	217	205	217	550
PREX1	1.71849	0.00015263	86	102	195	321
PIGT	1.19889	0.00105692	5702	5020	7920	11624
TOX2	2.53999	0.00401827	0	2	13	19
SRSF6	1.98626	5.64212e-05	3954	2985	4743	17719
SNAI1	1.92042	7.9712e-07	329	191	726	888
PMEPA1	1.38137	6.9005e-05	1368	1830	4471	2630
MTRR	1.78481	0.00537368	21	25	31	113
FASTKD3	1.08975	0.0284941	201	122	152	389
PEPD	1.00475	0.00492503	4032	3465	5041	6865
ABCC10	1.09869	0.00968162	552	708	739	1412
MOCS1	1.26316	0.00787982	292	381	355	940
MED20	1.28979	0.0378292	36	43	33	130
CDKN1A	2.16023	4.00415e-07	2422	1337	4611	9082
NRN1	2.49695	0.00176981	8	0	30	34
ATXN1	1.27408	5.58276e-05	1804	1455	3680	2787
EREG	3.62502	8.07107e-12	12	9	153	116
MT2A	3.68627	1.23529e-05	0	1	30	25
ABCC4	1.33326	0.00020115	216	215	515	390
TM9SF2	1.17499	0.00412618	363	178	455	526
PTGER2	1.4654	0.0258834	18	12	54	27
SOX9	2.07962	3.00573e-09	246	203	1008	618
IL1B	1.7733	0.000320636	78	35	241	108
GRIA3	1.90793	3.21389e-07	154	141	457	466
CD70	4.52203	1.11055e-22	20	12	507	252
FOSB	1.72965	5.51433e-05	94	134	276	360
RRBP1	1.04834	0.000784613	4823	4604	8508	7332
MKKS	2.04822	0.000295843	65	81	97	427
BFSP1	1.55429	4.29206e-05	314	216	899	439
DSTN	1.00556	0.00122866	3366	3223	6127	4694
TCF15	1.92277	0.0166742	2	7	29	17
GRPR	1.95989	5.32994e-05	32	66	184	160
NR1D1	1.73881	0.00040497	59	112	177	311
FRMD8	1.86348	2.59774e-05	243	320	552	1141
ASL	1.26902	0.000273632	549	530	1002	1103
SBDS	1.56157	0.000230741	1331	440	2227	2076
WNK4	1.12645	0.0059218	110	121	262	166
BECN1	1.22324	0.000781015	3051	1659	4214	4585
SIX1	3.7533	3.38121e-26	145	174	2514	1411
RHOJ	1.22587	0.000586293	296	370	750	553
L3HYPDH	1.63872	9.57656e-07	803	609	2301	1399
HSPA2	1.76792	0.00012306	64	54	146	193
HNRNPH2	1.29006	0.00340765	2161	1498	2079	4947
CANX	1.03085	0.00112601	3127	2965	5273	4804
IPPK	1.64839	0.00679792	32	68	54	221
HIVEP3	1.21572	0.0114297	156	298	280	583
RAP1B	1.3097	0.000217627	976	921	1678	2103
PTPRB	2.08027	0.00114163	6	25	73	63
EMC1	1.73191	0.0372065	342	464	550	2663
PKMYT1	1.04483	0.00755807	271	260	376	502
TICAM1	1.39912	0.00100725	104	120	215	273
TUBA4A	2.19687	3.34669e-07	53	80	271	263
VIL1	1.68303	0.0285624	4	10	20	30
GNG11	1.18236	0.00234282	789	413	1552	755
FGL2	1.55948	0.0276791	12	10	23	40
ADM2	2.59244	2.64455e-05	8	16	58	90
GNAZ	1.30775	0.00197044	92	129	231	228
A4GALT	3.27382	9.03495e-12	31	26	190	314
LIF	3.08536	5.35101e-13	417	396	1861	4040
KRT17	3.99134	4.55191e-15	9	13	187	175
CPA4	1.92327	5.81013e-09	1706	1611	4986	5332
DNAJB9	1.02791	0.00804663	1689	1032	1761	2600
LRRC4	1.11606	0.0106114	82	85	154	147
CALU	1.55745	4.9489e-05	15666	14682	26685	44889
LRRC17	2.59008	1.3661e-14	332	253	1820	1202
OPN1SW	1.43032	8.5652e-05	445	267	979	625
GAD1	1.58937	0.000237913	66	70	186	163
CHAC1	2.3708	4.53517e-14	1329	1277	6128	5163
FXR2	1.22355	0.0053807	202	266	314	569
CDKN2D	1.0251	0.00322223	532	585	1213	699
ADCY4	3.58637	3.95531e-08	3	6	72	66
ITFG1	1.49519	0.000909743	487	390	577	1396
RHBDF2	1.84267	3.08941e-05	206	238	430	881
KLF16	1.07646	0.00541159	292	338	468	604
SAT1	1.43444	4.36355e-05	6800	3605	13543	9651
SH3BP4	1.6379	1.04119e-05	1417	1713	3317	4622
LDLR	1.00208	0.00392249	2438	2206	3298	4103
KIF1A	2.79104	2.6843e-17	407	474	2945	2295
TULP4	1.42681	0.00382524	1103	1514	1276	4390
SNX9	1.30152	0.000113497	577	551	1145	1119
UNC13A	2.00212	4.48877e-05	53	27	185	105
PXDN	1.19133	0.000361843	5282	6099	10296	10795
PGPEP1	1.05599	0.00146459	705	623	1165	1072
OLFM1	1.62725	0.000520149	44	52	139	119
COL5A1	1.41311	8.03006e-05	16729	20701	35479	45406
FIBCD1	1.32546	0.00542575	57	72	118	153
NPAS1	1.26786	0.00191632	99	114	250	184
SESN2	1.26458	8.9079e-05	1773	1511	3269	3122
THEMIS2	1.95076	0.000125017	29	30	103	101
HIP1R	1.36035	0.00125961	152	215	323	452
ULBP2	3.87818	2.54425e-24	61	45	698	690
ULBP3	1.63382	0.005167	19	25	56	68
AAR2	1.52525	0.000875882	1547	1483	1832	5135
EDA2R	1.43519	9.20015e-05	799	808	1483	2022
CHMP1A	1.28211	0.00217169	3362	3374	4175	8803
F12	1.43724	0.000959199	67	84	208	145
CAP1	2.34589	1.06405e-06	3460	2574	5835	19661
PPT1	1.24012	0.00445598	2207	1564	2108	4876
RFTN1	1.30496	3.83504e-05	3076	3384	7385	5794
GALNT15	2.3711	0.00146782	7	5	18	54
SLC6A6	2.95748	4.08473e-12	337	359	1491	3126
NR1H2	1.80158	7.51207e-06	1168	752	1992	3397
PSME3	1.13838	0.00242999	3509	3351	4684	7290
ANO1	1.96937	0.00115021	12	25	57	81
TMEM204	1.85937	8.3578e-07	137	127	405	396
BARX1	3.27597	0.000283377	0	0	32	6
MAP1B	1.22665	0.00031211	52537	31123	81693	76109
STARD3	1.04263	0.00522749	3464	2802	4041	6132
RAI2	1.47456	0.0226843	24	17	29	72
DNAJB1	1.19852	0.00161022	6375	5414	8162	13236
FCRLA	3.42892	1.2912e-05	0	4	26	55
EMILIN2	1.99445	4.02292e-09	567	719	2592	1785
TRIM22	2.11767	2.54251e-06	208	268	541	1186
PTPRE	1.36722	0.00213435	66	81	160	160
RAP1GAP2	1.34525	0.0334933	22	14	46	38
ITGB4	1.28577	0.00200419	175	152	263	381
TRIM47	1.0745	0.00463194	171	177	368	246
EIF5A	1.30525	6.25573e-05	1460	1034	2815	2225
REEP2	1.17045	0.00210251	308	462	705	725
POLR3F	1.14982	0.00584073	320	318	411	717
RIN2	1.06993	0.00213332	5499	3114	9185	5725
SYT11	1.80574	7.10096e-06	120	84	298	298
DPH2	1.97906	0.000109855	395	274	446	1725
SERINC3	1.03904	0.00275669	9305	7192	11967	14918
ALOX5AP	2.16931	5.35027e-09	277	169	1105	628
MPRIP	1.02576	0.00130806	1504	1490	2672	2290
CHI3L1	1.7274	0.00440937	29	11	62	60
LGR6	2.91282	9.18394e-05	2	5	34	40
DCLK1	1.29893	0.0035179	85	106	169	220
STARD13	1.04042	0.00379705	243	245	473	357
RNF128	2.0871	0.00425604	8	6	23	42
SPINK5	1.08096	0.00715641	244	186	542	238
ARNTL	2.56501	7.15053e-08	25	39	176	171
LYVE1	3.28754	1.38173e-05	3	2	30	46
AMPD3	1.51573	0.00300998	50	46	87	144
MICAL2	1.36176	2.26903e-05	2337	2468	5248	4850
DPF2	1.69475	0.000326863	2223	1776	2519	7869
LOXL2	2.91406	1.0667e-10	5808	5820	20078	54743
TSPAN2	1.00559	0.0138487	127	122	267	156
SYT6	2.44738	0.000887706	6	4	29	37
PTGFRN	1.49744	4.71376e-05	2550	2164	4326	6335
NGF	1.70198	8.79745e-07	312	241	890	619
LDHA	1.59841	4.46036e-07	29257	22418	66821	60772
ANO3	3.501	3.74878e-15	21	30	293	252
NAV1	2.05179	1.15014e-08	2894	3338	9159	12122
CABLES1	1.75113	2.00903e-06	161	184	514	461
DOCK2	3.56014	2.30376e-10	9	8	125	92
EMP1	3.4527	7.23289e-25	479	478	4320	4631
SOX5	1.09469	0.00973752	124	118	187	233
SPX	2.08993	4.12817e-05	64	21	169	152
SPOCD1	2.69769	6.21247e-15	1759	1701	8345	10366
SLC43A3	1.88067	0.00015826	35	37	106	126
APLNR	1.55058	0.00031273	159	166	289	488
FADS2	1.45774	0.00274176	632	535	592	1961
COL4A2	2.28805	2.40961e-09	8817	8276	25617	42932
UBAC2	1.15409	0.00295503	2898	2242	3373	5640
STT3A	1.65806	0.00014386	5507	3450	6870	15655
SLC37A2	2.18924	0.00461981	1	10	35	31
OSTF1	1.09251	0.00120718	1359	921	2019	1896
ANXA1	1.00046	0.00168114	2702	2035	4251	3435
PSAT1	2.48413	4.11015e-09	1659	1324	4372	9442
ADAM19	1.02272	0.00153506	32441	21817	52803	37253
CCNJL	1.17937	0.00346034	208	310	435	528
OASL	2.82353	0.00117709	0	2	11	28
TES	1.07613	0.000642776	8111	8217	14652	13294
NT5E	3.69745	9.58632e-27	163	165	1819	1872
PRR5L	3.34671	1.68497e-17	231	251	1627	2599
LMO2	3.18223	6.05127e-21	198	223	2004	1354
DNAJC14	1.70623	0.00222002	111	114	109	503
B4GALNT1	3.416	9.15586e-13	18	17	201	160
FAIM2	1.51637	0.0082973	41	16	73	71
OS9	1.60542	6.47411e-05	3026	2304	4543	8408
MICAL1	1.58428	9.0865e-05	1131	1547	2426	4116
DYSF	2.22762	6.05544e-09	250	432	1426	1331
CPM	1.04816	0.00632812	229	151	384	266
KIAA0513	1.15131	0.0083637	886	685	841	1895
SLC9A5	1.19359	0.00400687	136	188	278	332
AGT	1.46175	0.00287965	73	62	110	197
PAX3	2.25928	0.000351651	17	7	76	43
DOCK10	2.20479	3.17681e-07	56	44	227	177
SERPINE2	1.14933	0.00636321	253	430	516	724
TMBIM1	1.72227	0.00026513	573	593	787	2334
ARMC9	1.68017	4.38807e-06	1650	1380	3232	4596
ALDH1L2	2.83567	2.78827e-15	127	99	832	573
CKAP4	1.05027	0.0157115	650	1250	1203	1991
APPL2	1.02871	0.00266392	1105	1005	1618	1829
DRAM1	1.18652	0.00214704	148	148	291	265
SLC41A2	1.49876	0.00289323	210	80	211	451
SUCLA2	1.02079	0.00674722	1519	1085	1697	2466
LMO7	3.31224	6.00515e-24	1018	927	7966	8400
LCP1	1.15746	0.00756145	174	169	230	384
GPNMB	2.17841	2.37018e-07	71	69	247	293
IL6	1.80013	0.0496945	0	1	4	11
TBRG4	1.24581	0.00166007	2822	2511	3573	6434
DBNL	1.22237	0.000665734	5124	4455	7439	10348
TTC5	1.07262	0.0018566	2694	1903	3612	4091
SRSF1	1.65902	0.000801771	395	308	410	1381
GALNT5	3.15807	8.62176e-20	154	116	1158	925
STAM	1.12367	0.0307878	101	106	96	266
ABI1	1.16788	0.00384307	1957	1535	2160	4012
KLF4	2.67427	9.86567e-09	33	24	188	145
TOR1A	1.29117	0.00023997	2178	1580	3311	4039
FAM129B	1.33734	0.000579171	1042	1630	2376	3151
TLR4	3.4373	1.86553e-22	135	110	1487	881
GABBR2	2.60953	1.51729e-06	22	13	97	105
MYC	3.64613	1.90039e-15	92	74	558	1300
TMEM63B	1.01477	0.0215669	241	359	348	626
TUBB2A	1.54602	1.71471e-06	3675	3396	8327	8471
RNF144B	1.07816	0.0123491	135	83	247	142
SYTL2	1.1578	0.000640629	490	435	871	807
NARS2	1.38997	0.0043037	175	130	181	460
SLCO5A1	2.31199	9.50381e-05	10	19	86	60
SULF1	2.49548	3.02103e-13	8567	7004	32618	39839
ALKBH8	1.10797	0.00209728	333	289	530	554
SQOR	1.20752	0.00940568	62	58	120	113
THBS1	1.20329	0.00114229	1603	2603	3934	4060
ITGA11	2.27363	2.93293e-11	2096	2342	8295	9521
UACA	1.12409	0.000744843	12869	10027	27383	14473
STRA6	2.77723	2.69851e-10	1743	2155	6744	16023
SPTBN5	1.66117	2.16401e-05	110	126	330	299
BCAR3	1.18801	0.000677306	380	345	675	667
GIPC2	1.3423	0.0268745	23	21	72	33
CGREF1	1.6274	0.0265386	19	3	43	28
CYP1B1	1.20249	0.000381501	792	738	1901	1063
SLC5A6	1.3058	0.00405218	1396	1469	1526	4089
MYOF	1.73921	4.85236e-06	881	1352	2757	3435
LOXL4	1.28663	0.0135265	37	77	104	135
CH25H	2.51004	0.00620925	0	0	12	8
DUSP5	1.49715	0.000229755	92	95	249	198
RBP4	2.25986	4.64548e-08	58	77	332	240
GPR87	1.3885	0.000818995	98	100	212	219
ANXA7	1.40787	0.000232569	1387	1024	2003	3093
ZNF365	3.30397	4.39361e-06	1	6	64	39
ADAMTS14	1.1055	0.00227408	306	334	552	569
MYPN	1.77246	0.03921	1	5	20	12
AOX1	1.628	0.0365854	5	10	13	37
CDK15	1.21798	0.00182978	158	155	289	307
IDH1	1.36263	0.00113944	2785	2278	3313	6984
ITPRID2	1.064	0.00166521	1317	1577	2471	2450
CHRNA1	3.88572	1.76103e-08	0	7	79	76
SLC35A5	1.17559	0.00314866	375	266	471	682
INTS14	1.27046	0.00574053	783	536	694	1806
SEMA7A	1.82034	5.64518e-05	50	51	194	122
FGF5	3.86293	3.52674e-25	141	75	1462	1313
GPAT3	3.46956	4.25745e-06	1	4	29	61
FGF2	2.55085	2.20955e-10	62	86	461	314
BMPR1B	1.345	0.0166091	64	23	144	57
NAAA	1.09089	0.0230116	54	57	121	82
2021-09-11	1.07909	0.000549837	11003	10074	22297	14537
SHROOM3	1.20288	0.000276985	1389	1283	2438	2528
EGF	2.30085	8.57909e-07	42	50	165	231
SHISAL1	1.00141	0.0250026	79	84	135	135
PARVG	1.53009	0.00178507	41	43	108	102
ETV6	1.10706	0.00267568	2386	1143	3345	2809
FGD4	1.50116	2.54947e-05	520	330	1255	765
AEBP2	1.40593	0.0028619	960	572	847	2356
VAMP1	1.5177	0.000154481	264	240	463	705
AMIGO2	1.23485	0.000350911	2155	2291	3847	4585
LRIG3	1.97	2.18716e-05	101	130	251	509
INHBE	4.61331	5.01318e-14	5	7	93	270
GLIPR1	2.21263	7.15574e-12	1149	830	4382	3300
PHLDA1	1.86406	2.98167e-08	2002	1732	5187	5896
DUSP6	2.24322	5.97157e-10	548	569	1897	2480
TMTC3	1.30124	0.00190914	1306	903	1440	2853
TMEM132B	1.41942	0.00451674	41	43	95	98
SLC46A3	1.16862	0.0456503	66	31	50	128
KANSL2	1.61549	0.000375749	941	569	1070	2620
CERS5	1.19405	0.00115592	3850	2280	4947	6194
LMBR1L	1.08937	0.00496457	2034	1565	2280	3746
SETD1B	1.1445	0.000618987	641	503	1100	956
FRMD6	2.24416	1.65145e-11	1177	801	4887	3076
RTN1	1.95701	0.000639175	29	15	114	51
SYT16	2.18928	0.00312017	2	12	55	26
SLC38A6	1.10707	0.0102891	83	86	172	134
FBLN5	1.39765	0.00333132	373	302	369	1046
WARS	2.39558	2.83548e-10	3716	3135	11319	18322
FGF7	1.54285	0.0127588	26	23	116	27
BNIP2	1.65811	7.59106e-05	1194	660	1677	3006
CYP11A1	1.20141	0.0147234	47	47	101	84
CYP1A1	1.90321	0.000275399	51	70	112	276
CCDC33	1.62315	0.0438116	2	10	18	26
TGFB1I1	1.4503	3.17014e-05	3059	2395	5333	6629
CLEC18B	2.23384	1.47599e-05	56	20	143	173
KATNB1	1.4998	0.000570581	637	715	958	2117
KIFC3	1.25156	0.00215603	570	918	1164	1724
NOL3	1.62202	2.14806e-06	462	549	1606	1036
CDH13	3.2192	1.90775e-19	317	341	2348	2881
OSGIN1	1.2991	0.000830259	225	262	435	542
RHOT2	1.32126	0.00330107	2947	2823	3112	8285
MYOCD	3.47792	1.53374e-13	33	26	227	375
UTP4	1.64424	0.000243062	646	359	792	1722
ARSG	1.20314	0.00621497	1926	614	3348	1617
BCAS3	1.11888	0.00332263	517	517	739	1055
SLC13A5	1.89737	0.00977094	7	8	22	38
SLC16A3	2.81935	8.89009e-15	723	926	4382	5498
TTYH2	1.36755	0.00779341	64	105	115	248
WDR45B	1.15979	0.00576504	2035	2202	2424	5061
PMAIP1	2.22052	4.09857e-12	876	724	3759	2546
NFIC	1.31932	0.000190833	363	477	1012	747
PLPP2	1.33711	5.90609e-05	488	506	1158	919
DPP9	1.00026	0.0108259	570	720	832	1233
CCDC97	1.19099	0.000549328	374	349	706	642
COL6A1	1.97793	1.55969e-08	13896	16580	44693	54272
COL6A2	1.20915	0.00161108	2227	4335	7455	5451
SAE1	1.39381	0.000629136	2681	1389	3255	5226
RCN3	2.07189	2.80968e-10	1493	1325	4764	4981
SLC2A5	2.21969	0.00942869	2	2	18	15
MYOM3	1.67815	0.0258569	7	7	25	24
C1orf216	2.10159	5.74249e-07	332	360	841	1612
PIGK	1.51276	0.000216071	373	260	553	897
BEST4	1.45127	0.00718174	38	24	86	64
PROK1	2.50101	6.61257e-07	27	19	136	106
DCAF6	1.27657	5.6333e-05	1439	1243	3141	2224
NECTIN4	1.7944	0.00111865	31	32	67	124
FCGR2A	1.99573	0.0274909	1	1	12	9
USP21	1.07379	0.0334247	234	176	165	512
PRCC	1.06767	0.0110081	1726	1279	1614	3306
ABL2	1.25921	8.46288e-05	1380	1389	2889	2530
HMCN1	3.11048	9.95495e-22	521	525	3977	3708
ECM1	1.79727	3.27545e-08	1139	1219	3520	3257
SNX27	1.02526	0.0167925	2063	1976	1978	4453
CERS2	1.80949	0.0324665	131	150	191	1070
SYT14	2.2985	2.91123e-07	372	107	1192	864
KCNN3	1.49181	0.0107727	17	53	79	100
ACTA1	2.35622	7.87305e-12	217	234	1187	802
CEP170	1.06563	0.00871152	358	162	502	389
DEGS1	1.13895	0.00392343	1976	1596	2255	3940
PSEN2	1.44742	0.00132386	242	233	326	716
PPFIA4	1.13644	0.00255595	264	373	587	569
RHOB	1.02684	0.00199534	1028	974	2150	1257
ATP6V1C2	1.18752	0.0188693	84	35	118	109
TEX261	1.10072	0.00133023	1418	1800	2815	2813
RALB	1.54822	0.000101425	847	814	1420	2483
SLC20A1	1.6658	3.32034e-07	2119	1878	5086	5248
TMEFF2	2.18301	3.14574e-07	51	59	261	182
DLX1	3.14087	8.12987e-18	139	135	962	1109
SUMF1	1.37965	0.000459887	283	300	504	724
COPS7B	1.19495	0.00323574	2823	1698	2970	5162
2021-03-04	3.02878	3.12281e-10	29	74	335	450
STK11IP	2.03525	0.000145983	76	152	192	619
SLC25A38	1.35252	0.000795556	467	288	618	921
SLC22A14	1.8262	0.00299465	9	37	96	67
STAC	2.90632	2.39613e-10	48	47	233	395
IL17RD	1.33993	0.00114128	101	92	212	195
COL8A1	3.73576	1.75085e-22	2358	2319	20241	33534
TAGLN3	1.26812	0.0413242	18	23	61	32
ADPRH	1.64474	0.0242321	10	7	26	29
NCEH1	2.13305	5.76303e-07	61	49	224	194
RUBCN	1.16418	0.00701738	1134	691	1049	2153
TCTA	1.07097	0.000892924	1708	1678	2976	2788
UCN2	3.98046	3.39547e-15	14	30	248	442
EPHA5	2.28886	3.99161e-06	47	23	211	107
OCIAD2	1.40849	2.92917e-05	1412	1059	3542	1978
SCD5	2.28091	5.23197e-10	123	107	560	401
DDIT4L	2.9398	4.53243e-05	3	7	28	69
ROPN1L	2.18987	0.00128456	13	5	55	34
OSMR	2.33432	7.47808e-10	102	83	437	362
CRHBP	1.02715	0.00318443	491	368	730	684
PAM	1.16387	0.000957441	2235	2250	3523	4521
SPATA9	1.27278	0.0270195	49	18	90	54
TNFAIP8	1.43812	3.27356e-05	732	470	1396	1259
N4BP3	1.17677	0.0238823	36	57	85	95
TENM2	1.49951	9.24589e-06	415	447	1082	935
DOK3	1.26367	0.00958486	78	104	125	234
FAXC	1.78459	0.000258136	68	30	181	117
VIP	3.47834	1.50851e-06	7	0	64	50
ARMT1	1.25391	0.01077	402	385	348	1138
SLC22A3	1.22026	0.00427883	98	143	226	242
EGFR	1.8949	9.87229e-09	454	457	1510	1310
PSPH	1.1438	0.00029628	1408	1299	2750	2150
SH3KBP1	2.06026	5.5726e-11	1507	1529	6047	4578
MSN	1.256	0.000287579	7460	7833	13098	16267
ATP6V1B2	1.46755	0.00114348	1791	1602	2035	5425
CHMP7	1.74346	0.000238132	936	1038	1314	4058
DOCK5	2.60142	1.25285e-15	568	473	2769	2526
CER1	2.88249	1.78503e-05	5	7	46	57
CDKN2B	1.20282	0.000126633	3143	3264	6946	5215
SHC3	1.37011	0.0054409	41	74	168	98
C9orf3	1.96361	1.86816e-09	625	663	2243	1946
STOM	1.37588	0.000108282	1604	952	2599	2744
GSN	1.91012	3.78216e-05	4408	5185	7555	21974
ASTN2	1.26042	0.00238704	202	166	285	424
SURF4	1.16326	0.00336339	6676	7351	8931	15996
GBGT1	1.4157	0.0183947	27	19	45	63
PTGES	2.25782	2.80596e-09	337	194	979	1127
RSU1	1.18568	0.000170854	5152	3855	9501	7237
ANKRD1	1.76018	1.84557e-07	4701	4329	17538	8754
HTR7	3.23859	9.78113e-12	21	18	197	154
INA	1.94252	1.74652e-08	242	256	889	722
CNNM2	1.08314	0.00242161	272	309	597	428
ADM	1.92281	1.80082e-09	2111	1582	6201	5344
HSD17B12	1.0775	0.0102996	337	413	462	803
PAMR1	2.82634	1.91269e-12	634	737	2976	5255
TNKS1BP1	1.21809	0.007345	522	601	598	1478
CCDC81	1.53304	0.000411083	128	65	291	186
DRD2	2.12653	0.00324089	3	12	44	33
SLX4IP	1.22318	0.00252044	885	417	1050	1370
ST14	2.41144	0.00067792	3	11	38	49
HYOU1	1.41474	0.000626596	2138	2166	3029	6122
ZP1	4.60553	4.32113e-19	8	8	277	160
FEZ1	1.74381	5.37159e-07	295	224	788	655
KIRREL3	2.70387	1.01248e-08	30	31	162	196
TAGLN	1.10131	0.0252605	93	92	106	214
KIAA1755	3.96786	4.02853e-25	152	224	2321	2935
LTO1	1.1305	0.00325645	680	524	844	1246
TRPT1	1.00787	0.0162054	352	173	373	467
FERMT3	1.75624	0.000403975	43	55	112	172
MRPL49	1.09142	0.00409481	4097	2472	4547	6480
ALDOA	1.8468	4.30817e-06	110	109	304	354
MMP3	3.70082	1.58237e-08	9	1	101	66
LYPD1	2.78099	1.70628e-11	49	42	322	237
VEGFC	3.54147	3.82807e-16	23	34	359	269
CCDC102B	1.10077	0.0248836	86	52	182	77
PRSS23	1.3663	1.13713e-05	4130	3860	10089	6992
DLAT	1.15072	0.0152463	135	120	147	306
PIP4K2A	1.02855	0.0141776	8631	3018	8844	10037
CRIM1	1.02904	0.00509033	8635	5052	16033	7489
UBC	1.67959	0.0341665	7	8	8	44
SLC7A11	2.84708	1.36749e-18	464	392	3158	2135
CACNA2D4	3.81167	7.43901e-14	30	7	284	235
BTBD11	2.69674	9.29258e-10	52	30	254	219
NPAS3	1.10263	0.024747	56	47	119	72
EXT2	1.10509	0.0101945	450	625	640	1211
ME3	1.17852	0.0116303	55	69	130	109
ADAMTS12	1.35426	9.0773e-05	545	394	1246	762
VIPAS39	1.13019	0.0205222	305	259	245	726
FRMD4A	1.05112	0.00254497	529	499	1154	637
EPS8	1.36746	6.68358e-05	1830	1076	3577	2593
ACAD8	1.46448	0.0188028	27	22	34	84
ANO4	1.64316	1.10183e-05	156	198	547	395
DPYSL4	1.51516	9.31617e-05	713	1076	1805	2401
ASAP2	1.42998	0.00109245	92	172	404	225
FLI1	2.3431	2.59252e-07	56	76	228	352
TMEM267	1.99244	4.84842e-05	204	76	308	616
GFRA1	2.19839	3.2978e-07	70	47	229	232
CACUL1	1.55643	0.000352922	7092	2669	8893	14089
DST	1.47941	1.41583e-05	7488	5441	20215	10347
TMEM132D	2.29762	2.48415e-06	32	27	129	131
KCNE4	1.27643	0.000385892	308	254	726	421
PTPN14	1.12054	0.000317585	2970	2608	5656	4276
CYSLTR2	2.24808	0.000284506	17	8	71	49
PDK1	1.14443	0.000814822	1304	823	2339	1538
XRCC4	1.05688	0.0039567	616	344	863	753
DCLRE1C	1.04807	0.0215375	226	176	214	442
OLAH	3.47286	4.55271e-17	38	33	458	276
NMT2	1.09524	0.000890065	1277	1422	2431	2266
ZSCAN1	2.38066	0.00609804	1	2	12	20
PAN3	1.317	0.00327449	2618	1122	2463	4871
MBNL1	1.29698	0.000220353	377	478	1037	728
GPD1L	1.0011	0.0349828	67	78	106	133
PRDM8	2.99182	0.000299499	2	1	37	15
HHEX	2.58797	0.000418819	8	2	40	35
PTPRK	1.5938	0.00932842	25	29	136	29
PLOD2	1.05289	0.00134232	1101	1145	1952	1831
STK32B	2.78208	1.82824e-07	21	35	118	241
BMP6	1.6547	1.39564e-05	149	111	385	302
PTPRR	1.65615	0.00323758	26	23	97	48
NR4A2	1.41974	0.0059561	50	34	83	107
PLA2R1	1.32757	0.000510394	184	142	430	261
PLEKHG4B	1.35335	3.17064e-05	1256	1066	2466	2352
KCNJ16	1.54306	0.00831273	41	19	124	42
KCTD15	1.20953	0.00209583	669	849	1117	1708
DDAH1	1.74544	0.0346792	1754	2066	2595	12568
AK5	3.13762	2.4147e-22	364	326	3086	2161
ANKH	1.72335	1.68132e-07	468	434	1344	1125
UBASH3B	2.34413	2.36513e-11	162	159	769	619
PITPNC1	1.27108	0.000698156	168	196	418	318
FAM167A	2.77518	1.91127e-05	11	25	43	212
ENAH	1.03254	0.00273603	14890	8230	21099	17143
SH3RF1	1.63401	2.6151e-06	824	784	1859	2199
CNTNAP3B	1.41934	0.002036	55	57	137	119
PDLIM3	1.3226	3.05631e-05	2307	1793	4579	3789
SORBS2	2.67056	2.77995e-14	362	362	1786	2082
PDE1C	2.44531	4.53354e-05	7	31	105	107
ADAMTS5	1.38415	0.000616194	132	187	465	258
PIEZO2	1.595	1.21763e-06	502	497	1448	1070
ZNF18	1.37549	0.00591527	244	163	210	631
VOPP1	1.20764	0.000592034	1328	1459	2348	2841
KLF10	2.04416	0.00187989	21	48	35	234
ZFYVE27	1.09922	0.0106463	565	675	693	1416
GRAMD2B	2.32211	2.05077e-05	29	38	89	212
HEATR3	1.05741	0.0267514	67	69	102	131
RBM45	1.13126	0.00253386	545	320	732	788
PDIA4	1.54186	0.000297062	6124	4896	7858	17662
KDM8	1.09374	0.0126409	125	86	164	201
FZD7	1.00244	0.00319034	908	941	1453	1533
FMN2	4.14281	2.58041e-30	101	62	1398	1168
RAB39B	1.14063	0.041224	31	34	57	66
AFF2	1.02084	0.0348027	51	90	135	110
KIF5A	2.75454	2.9742e-08	35	16	163	154
ADK	1.1204	0.000559302	1769	1302	3280	2216
DCK	1.03213	0.0166461	122	140	186	249
MAP3K7CL	1.96983	3.40359e-06	97	56	264	245
PCDH1	2.38504	3.47583e-08	69	107	342	455
PTDSS1	1.76174	0.0327374	289	285	390	1906
SUPV3L1	1.30114	0.00349372	441	487	555	1270
HKDC1	2.60896	6.92935e-05	7	8	52	49
HK1	1.30548	0.000726017	3785	4248	6015	9868
CD109	3.20425	7.9873e-16	51	79	606	480
NODAL	1.66848	0.00217425	27	33	71	97
TMEM171	2.65728	0.000320664	7	2	44	30
NRG1	3.0481	1.97273e-17	119	108	1040	625
NECAP2	1.0318	0.00290066	849	644	1176	1267
MMP14	1.54192	3.03688e-05	584	940	1916	1806
CLEC18A	1.65193	0.00543309	16	28	56	71
KIT	2.68388	2.56376e-11	117	169	686	899
CACNA2D3	3.02785	1.36477e-14	52	55	445	335
MYO1E	1.67763	1.84603e-06	689	597	1519	1823
AFAP1L1	1.56805	0.000130105	129	81	272	247
TSC22D3	1.73441	0.00614984	29	12	40	83
SLC35B2	1.82019	8.49244e-06	1965	1369	3280	6190
CREB3L1	1.22499	0.000674609	1628	1912	2922	3750
DGKI	1.27827	0.00185962	105	124	232	230
PAFAH2	1.24218	0.00480626	226	159	259	467
EXTL1	1.63713	0.00177068	40	48	84	150
MRAS	1.0788	0.00106928	1760	1907	3156	3122
CUL4B	1.2206	0.000163077	1370	1270	2561	2431
HIST1H2BD	1.34462	0.00379057	57	59	161	96
HIST1H4H	1.58222	0.00118054	39	43	127	90
PKD1L1	2.74388	5.79623e-09	24	47	275	177
TAGLN2	1.40874	6.02317e-06	5859	4739	12702	10324
NBL1	1.56123	2.60545e-05	298	434	913	892
CDA	3.90623	2.72974e-17	15	19	299	206
CCAR2	1.30818	0.00556799	292	369	365	949
STC1	1.34133	2.87302e-05	1417	1216	3366	2185
HOXB13	1.99218	0.028601	0	0	14	2
RCAN1	2.92336	1.6053e-14	1142	1243	5933	9334
RUNX1	1.65397	9.40219e-06	447	755	1882	1364
GJD2	1.89116	0.00012197	385	87	1039	522
SIM2	1.53216	0.000338163	95	96	332	155
ADIPOR1	1.02894	0.00424834	2489	1970	3064	4135
HK2	1.09404	0.00174342	433	308	714	577
ALDH4A1	1.34622	0.00147285	415	503	651	1227
SPON2	2.50262	3.31662e-11	89	94	542	367
TPPP3	2.11544	2.48542e-08	144	188	809	458
CARMIL2	1.68623	2.34048e-05	113	165	396	364
NPR2	1.12507	0.00439454	225	247	361	471
SLC37A1	1.65159	0.00675162	21	53	54	154
CBS	1.70521	6.51402e-05	206	241	429	766
G6PD	2.09952	2.82556e-06	1015	1377	2495	6024
GAB3	2.53723	3.48803e-05	11	11	56	73
SLC2A6	1.5758	1.08512e-05	854	899	1868	2377
SHKBP1	1.54301	0.000784147	1115	889	1236	3417
SHC1	1.97141	6.37763e-05	2901	2841	3887	14609
ANO10	1.98569	0.000108395	198	168	259	945
LMNA	1.01842	0.00160229	10081	12252	20730	16483
MUM1	1.17537	0.00140473	912	796	1291	1783
LRRC14	1.08013	0.00427298	526	557	769	1063
LRWD1	1.04199	0.00946161	449	690	797	1103
ABCF3	1.4237	0.000801014	1457	1259	1826	3961
PGAP3	1.3102	0.00738366	493	671	558	1756
SHANK2	1.90886	0.000314829	24	31	88	98
CYB561A3	1.25323	0.00785705	526	433	469	1333
CMPK1	1.29032	0.000275281	983	777	1548	1901
AK4	1.90792	2.80885e-09	1687	1339	4861	4475
SYNC	1.76092	0.00132726	27	38	72	122
ALPL	2.41354	4.18501e-07	134	199	435	1089
ADGRL4	3.21498	1.56494e-08	13	15	84	175
LHX8	4.69695	1.12277e-30	33	27	659	789
NTNG1	1.9218	3.93134e-05	41	40	146	124
HENMT1	1.87088	4.71005e-05	99	42	227	213
ATXN7L2	1.69414	0.00128788	140	110	146	518
ARPC5	1.46035	0.000138541	3153	1767	4537	6269
IGSF8	1.22709	0.00187404	1365	1324	1828	3170
DDR2	1.10539	0.00125388	1779	1462	2575	2995
NCSTN	1.27096	0.00398629	3436	2803	3384	8449
OLFML2B	2.79929	2.52023e-09	87	82	307	713
ATF3	1.25045	0.043735	16	42	47	76
PQLC3	1.32568	0.0314489	17	23	49	43
SPATA18	1.44617	0.00378656	43	70	112	151
SGPP2	1.28295	0.0142304	37	36	96	61
INHBB	1.08006	0.0296445	44	64	103	92
PDLIM5	1.29581	4.67283e-05	3815	3442	7384	7064
TNFAIP8L2	1.68602	0.0243658	13	15	9	80
ANTXR2	1.80057	4.63509e-06	124	129	346	389
PBXIP1	1.60979	0.000155212	239	182	377	662
CLDN1	1.97445	0.0295772	1	1	6	14
COL6A3	2.76728	9.84785e-14	6879	7743	33567	49973
IGFN1	2.61296	3.37033e-06	20	11	85	97
FSTL1	1.59936	1.70269e-06	12305	13103	29639	33084
TMEM169	1.55713	0.00194256	47	44	93	134
IGFBP7	2.81886	9.73373e-08	24	15	107	150
TMEM79	1.55582	0.000354739	120	95	209	309
ADORA1	2.38059	2.40064e-05	48	57	97	391
NEK10	2.60313	4.93932e-08	25	29	162	140
FBLN2	1.70199	0.000110328	2633	3706	5148	11685
EIF5A2	1.8464	8.39737e-08	325	239	967	729
NKX6-1	1.11493	0.0428097	30	57	118	54
ALB	1.81719	0.0462155	1	1	13	6
PRICKLE2	1.03964	0.00331717	1063	802	1391	1661
TIPARP	1.23067	0.000186255	2097	1432	3575	3137
SMIM14	1.06677	0.0044128	1990	952	2519	2425
ABHD6	1.30361	0.0101186	68	72	94	190
CXCL3	2.55045	2.725e-06	47	12	224	112
TM4SF18	2.74844	7.16206e-05	7	4	51	38
CDCP1	4.29796	8.14513e-31	107	79	1456	1777
RTP3	1.82681	0.0430443	0	0	14	1
RPN1	1.35088	0.00212977	5456	5466	6331	15750
HEYL	2.6127	1.19065e-06	40	38	110	318
RFT1	1.02664	0.016537	603	310	548	911
EXO5	1.32756	0.00124847	667	339	817	1194
C1orf50	1.07171	0.0472168	46	29	75	60
SLC9B2	1.5462	0.000551649	80	72	159	210
CAMKV	2.58582	0.00237673	1	3	7	38
ANXA5	1.42804	0.000186219	4848	2427	7016	8658
HHIP	2.32816	2.56032e-08	55	55	256	226
PRMT9	1.0886	0.0240712	376	301	288	839
ITGA2	1.75963	1.53104e-07	944	679	2883	1751
ZNF474	2.20689	0.00275774	4	16	19	84
F2RL2	3.87068	9.77493e-26	161	105	1568	1817
F2RL1	3.53651	7.76309e-20	168	112	1179	1624
WDR41	1.01988	0.0028066	2856	2520	3970	4719
SCGB3A2	3.69816	5.08582e-13	14	10	196	125
ESM1	5.88565	8.28215e-21	4	0	184	222
CASP3	1.07758	0.00377072	1066	759	1292	1758
EBF1	3.51706	3.35178e-10	50	41	173	829
GFM2	1.20067	0.0110581	389	337	350	966
GJB7	1.23441	0.00270769	152	125	382	180
SAMD3	1.9072	0.0038478	15	8	54	34
TMEM200A	2.27646	3.25484e-08	222	243	692	1187
STK17A	1.1373	0.00332025	165	222	377	331
GALNT10	1.20721	0.000303739	2535	3224	5715	5207
SYTL3	1.02044	0.0109894	170	113	258	213
HEY1	1.68111	7.7488e-06	726	708	1509	2217
SHH	3.01203	7.01622e-08	17	14	85	157
COL1A2	1.06457	0.0205703	3120	5132	3970	9778
DLC1	2.01886	1.85319e-08	1806	1879	5211	7028
MICALL2	1.11384	0.00300362	231	317	521	462
BAALC	1.17786	0.0309204	32	40	98	49
FZD6	1.04276	0.0148639	107	111	170	197
CTHRC1	3.5426	1.38755e-06	2	3	67	30
DCSTAMP	4.81522	1.37451e-13	2	3	94	122
GEM	1.78801	0.000220448	82	85	154	327
PDP1	1.78103	8.18921e-07	560	539	1350	1731
UBAP1	1.25692	0.00447317	1524	1473	1631	4024
ABCA1	1.16237	0.0042432	4175	2043	4331	6623
ZMAT4	1.24099	0.00864202	68	46	126	102
MAMDC2	1.87413	1.09596e-05	155	115	314	500
C8orf34	2.72013	5.58353e-06	19	7	127	55
HNRNPK	1.24417	0.00238149	7038	4687	7514	14305
FBP1	2.4426	0.00115249	6	3	41	23
TMEM246	1.76994	2.66287e-05	477	321	766	1430
DYNLT3	1.49656	5.46927e-05	158	161	415	338
PTCHD1	3.15645	1.79892e-15	64	69	479	559
PIGO	1.33553	0.0124835	198	258	181	749
SLC7A3	1.41586	0.00178112	99	64	157	201
PGM2L1	1.38937	1.34286e-05	2126	1583	4557	3428
REEP3	1.59943	0.0002695	720	529	925	2100
PKNOX2	1.71908	0.000133152	209	282	431	900
DEPP1	1.43246	6.83707e-05	2143	1471	3433	4376
CDX2	2.61919	0.000172092	4	8	40	47
OTX2	1.83709	0.0209917	7	3	30	15
VSTM4	1.15708	0.0359665	36	40	57	86
JCAD	1.81405	1.01709e-07	419	491	1407	1263
CASP7	1.61728	0.000431474	200	241	338	767
PACSIN3	1.12756	0.000757362	1994	1787	3148	3481
SLC39A13	1.89234	1.30171e-05	1570	1320	2597	6085
RAPSN	1.21112	0.0391791	20	42	58	69
PTER	1.5493	0.00700479	43	38	53	148
ABTB2	1.18341	0.00455178	106	95	191	186
HTRA1	1.32365	4.84917e-05	4201	4672	11657	7042
GPR176	2.18824	1.4647e-09	519	562	1790	2290
FBN1	2.01979	8.23504e-10	6356	8062	26297	22780
TRMT61A	1.573	5.54715e-05	772	726	1359	2228
LARP6	1.04491	0.00138207	1002	1099	2110	1480
GABRB3	1.48692	4.50872e-05	198	162	488	356
SGPL1	1.71955	0.000227823	6854	3898	7448	20845
PLEKHF1	1.33519	0.0184591	26	29	82	45
SMPD1	1.11469	0.00109973	1516	1768	2784	2978
TPP1	1.13277	0.0139608	701	798	708	1887
SERPINB7	2.91081	3.24601e-08	38	24	127	297
SERPINB8	1.40665	5.32884e-05	294	247	651	533
IDH3A	1.47144	0.00011195	386	382	719	1004
ST5	1.09009	0.00704663	639	592	752	1320
SEC11C	1.32271	0.0231281	29	21	54	56
NDEL1	1.73343	3.23107e-05	2350	2323	4059	8474
BLCAP	1.45588	0.000254529	3269	1562	4465	6122
NNMT	2.29495	1.17031e-05	18	36	161	95
SLFN5	1.64767	1.77351e-07	1550	1531	4720	3341
C16orf45	3.05779	1.50875e-15	88	82	569	653
ANPEP	4.00719	8.63737e-14	9	30	230	424
ELFN2	2.41646	0.00274562	3	3	38	13
PIP4K2C	1.1876	0.0084557	889	938	927	2359
SCG5	2.74831	0.00129506	2	1	42	7
GREM1	3.07233	1.13206e-08	14	31	133	234
MAP1A	1.32324	3.25515e-05	6513	5254	12238	11601
AKTIP	1.20502	0.00338889	371	230	440	662
MAPRE2	1.13091	0.00753283	722	878	938	1849
EVA1C	3.583	1.60326e-08	5	5	87	61
MARS	1.64865	0.000160239	5657	5244	7947	19448
SAMD14	1.67566	0.00184616	34	63	92	177
TMEM92	1.06497	0.00258083	393	290	715	468
PRRX2	1.51785	2.74479e-05	519	654	1918	986
TBC1D2B	1.06164	0.00280389	561	515	835	967
ZNF668	1.91685	6.30335e-05	120	108	210	504
SMG8	1.97245	0.000320133	140	118	152	700
RHEBL1	1.11755	0.00376771	189	152	393	230
PPP1R14A	1.15192	0.00259126	351	341	923	402
ATCAY	1.19568	0.000671258	322	251	600	478
KRT80	2.47498	1.07549e-08	182	124	499	925
SPRYD3	1.58087	2.09332e-05	3156	3665	6754	9789
IGFBP6	3.1959	7.4589e-25	1475	1411	12925	9750
MGAT5B	2.74378	1.67124e-05	5	12	70	57
SOST	2.26847	0.000205606	9	26	131	50
E4F1	1.40731	0.0123084	62	57	62	199
KCTD5	1.01827	0.00555152	648	624	889	1166
VWCE	1.17723	0.00207002	275	311	480	594
BEST1	1.02779	0.0345563	57	61	94	106
SLC3A2	1.39792	5.18778e-05	11989	9128	20021	24551
ENTPD3	2.45341	0.00243311	4	5	6	62
DDIT4	1.55231	4.28739e-06	2878	2449	5853	6771
KIF5C	1.16806	0.0151993	107	243	526	191
MFSD2A	2.12405	2.41977e-05	103	47	177	375
MLKL	3.02266	3.82213e-06	6	9	44	92
STIP1	1.3146	0.000762992	5674	4745	7477	13053
CCDC110	1.2558	0.0492984	16	20	41	38
CAVIN2	1.15794	0.00825288	77	78	156	134
MTCL1	2.54977	3.03639e-11	263	324	1216	1685
GBX2	1.67871	0.000534566	75	35	144	155
SERINC2	1.64019	1.38576e-05	360	516	1052	1214
SLC20A2	1.42068	0.000506156	902	1183	1637	2874
GDNF	3.08452	7.76706e-08	22	6	169	82
SLC16A4	1.15854	0.00116047	468	303	852	571
IL7R	2.8382	1.09491e-16	235	171	1470	1031
CHTF8	1.15774	0.0115737	590	712	648	1655
LCMT2	1.55418	0.00273624	310	320	297	1202
IL12A	2.13962	0.0192637	0	0	3	12
ATOH8	1.67987	0.000797164	37	43	100	122
MAT2A	1.33472	0.00712375	303	372	324	1042
SLC35G2	3.26357	0.000100593	1	2	6	61
CTRB2	1.51796	0.0230504	9	27	36	62
ACTBL2	1.93034	0.00125398	25	51	60	201
AR	1.40053	0.000359209	167	199	556	282
ARMC4	1.83633	0.00791117	17	5	48	33
CPT1C	1.06858	0.00766534	630	673	808	1362
XPO6	1.01368	0.0225035	680	1088	931	1920
RAB3B	2.18469	1.3565e-11	5315	3898	21913	13600
SH3TC2	1.46257	0.0193324	15	31	42	73
ADRB2	3.26656	5.94985e-06	1	6	57	42
HSPB3	2.12204	0.000788264	14	10	71	37
KCNAB1	1.37381	0.00408653	58	61	111	147
CRADD	1.1054	0.0188634	90	50	131	119
CXCL8	5.8106	7.34544e-39	42	28	1308	2571
SCN9A	3.38693	9.28279e-16	39	28	394	255
SDC2	1.52965	3.76624e-06	532	563	1434	1186
GPR183	2.20465	0.00070815	9	11	45	50
ANTXR1	1.09314	0.00173209	2855	2507	4018	5091
BOLA2B	1.13747	0.0337838	42	32	90	53
MT1E	1.39441	0.000780555	105	98	299	162
NLGN1	1.53049	0.0216789	18	10	53	27
ROBO1	1.00098	0.00192763	3454	2811	6493	3901
WNT10B	1.4787	0.0153192	36	16	45	81
FRMPD4	2.09056	2.00701e-05	33	33	119	130
TMEM154	2.04504	1.41641e-07	128	124	403	467
ALCAM	1.0549	0.00215428	827	712	1750	936
SERPINA9	3.2663	2.85481e-05	1	3	29	39
ADRA1B	1.0008	0.0492464	51	41	91	66
GLB1	1.40937	0.00122564	4067	3635	4740	11474
CMTM8	2.54067	5.14191e-08	35	46	310	138
FOS	1.06792	0.011023	1643	1575	1710	3587
CST1	1.73995	2.35743e-05	155	80	361	299
TCAF2	1.44883	0.00129942	64	99	183	195
LRRN2	2.16414	3.68899e-05	24	41	106	157
KRT86	2.32328	0.00018541	12	10	69	45
HARS	1.35456	0.000220087	3895	2712	5643	7808
KRT75	1.82462	0.0466773	1	0	5	10
NPAS2	2.27583	4.09076e-05	29	12	104	83
ARL6IP1	1.53154	0.00139554	2584	2050	2467	8192
CDH2	2.00812	7.11257e-09	3000	3298	9408	11430
RIOX2	1.2143	0.000644001	812	519	1214	1269
TMEM43	1.7566	0.000166003	413	272	520	1348
CAVIN3	1.34909	0.00412203	69	81	245	98
C11orf24	1.16189	0.00180391	2809	2285	3607	5415
NPTX1	2.29868	0.0115892	0	1	11	11
ZNF440	6.29795	9.29109e-27	1	4	442	217
ZDHHC16	1.31388	0.000497613	208	246	451	477
CHST11	1.41988	0.0212239	18	19	52	40
PGAM1	1.26898	0.000336709	17694	9906	26165	27199
APLN	2.22494	0.00829221	6	0	22	22
KSR2	1.73865	0.0192202	8	11	15	50
ZNF562	1.0658	0.00724865	1573	1267	1697	2974
LRRC8C	1.25665	0.0115172	41	50	108	81
LRRC8D	1.30711	0.000931163	280	190	410	526
COL24A1	2.56094	5.90533e-07	33	15	157	109
FGG	1.39882	0.0282845	17	16	43	38
PIK3CD	1.45251	1.42792e-05	425	419	1040	868
VAT1L	1.00099	0.013054	229	297	366	485
NHLH1	1.95553	0.0283717	2	1	14	10
CTPS1	1.4692	7.64851e-05	1669	1508	2835	4216
EXOSC10	1.12045	0.00759593	1315	1285	1450	3003
C3AR1	2.3323	1.33511e-05	20	19	95	89
PRND	3.21405	7.84856e-07	6	5	76	48
PRNP	2.52563	4.54743e-08	827	962	2290	6421
ADRA1D	2.931	0.000666268	1	1	36	9
FRMD5	1.95314	2.7484e-06	103	77	264	319
TVP23B	1.21838	0.0016916	2946	1364	3701	4302
DRC3	1.24512	0.00475288	172	81	234	255
EPHX4	2.63643	0.000362354	2	7	38	36
LRRC15	2.32247	4.1968e-05	16	17	73	84
SLFN12	2.87092	1.41357e-11	47	33	300	226
SNTB1	1.20614	0.0430338	25	22	59	39
B3GALT1	2.91931	0.000567343	50	27	178	921
BPGM	1.47998	2.38309e-05	1507	885	2765	2651
RCAN2	2.76935	1.70748e-11	84	60	373	470
NIPAL4	1.64791	0.000891997	34	47	114	109
SNTG2	2.21601	0.0152591	0	1	18	5
RASGRP1	2.31841	1.0534e-06	32	32	182	112
SLFN11	3.61892	8.10795e-11	7	12	117	131
TMEM217	1.21699	0.00628056	74	65	149	123
RARG	1.69535	4.796e-05	947	1212	1956	3740
MYEOV	2.60404	5.14104e-06	20	9	102	73
MRGPRF	1.97209	4.32692e-05	43	41	123	162
MYD88	2.81789	4.02672e-11	526	396	1751	3718
SLC22A13	1.94447	0.00973563	5	7	34	21
SH3RF3	3.5166	1.07784e-22	107	145	1413	1152
RXFP4	1.81199	0.0360256	2	5	4	31
CCDC63	1.94388	0.0324563	0	0	6	7
ABLIM3	2.57162	2.89541e-07	26	19	133	115
SLC2A14	1.8117	6.94485e-05	155	145	277	588
OLR1	1.67813	0.0069216	18	15	44	54
SAA1	2.15652	0.0152006	3	0	16	13
RNF26	1.8455	0.0418922	268	361	313	4191
PTPRM	1.33873	0.0019549	310	490	602	1048
TNFRSF10D	2.09648	7.47501e-09	944	1552	5435	3829
TNFRSF10C	2.44652	1.35285e-07	148	138	384	934
NABP1	2.4468	1.37843e-11	1089	594	3753	3881
SUSD5	2.45796	1.90974e-08	85	122	376	603
NET1	1.39342	0.000467379	1028	851	1429	2500
FAM174A	1.22326	0.00133734	1115	504	1727	1362
RGMB	1.74985	3.77846e-05	79	61	248	160
GLIS1	3.80283	1.31884e-18	54	84	678	1078
CHRNA9	3.39878	1.32132e-07	9	3	64	83
PODN	1.87271	0.00354	14	12	41	51
ZCCHC12	3.33831	1.23705e-09	59	31	177	674
CMKLR1	3.25077	4.21653e-07	8	6	50	99
SLCO2A1	2.20325	2.22686e-05	24	28	98	119
CD248	1.10728	0.00181781	1401	1932	2844	3015
RAB1B	1.27047	0.00251787	1922	1874	2323	4926
CHST2	1.82253	0.000139586	71	36	149	173
PSMD2	1.25851	0.000156514	19210	18641	34107	38775
DOLK	1.10985	0.00204262	2105	1509	2696	3491
CATSPER1	2.021	0.000120675	21	31	111	85
TMEM9B	1.17879	0.00159429	1614	853	2104	2357
NRIP3	1.71111	1.94548e-07	802	701	2586	1571
CLCF1	1.87372	1.87544e-07	317	292	851	984
UCP3	1.64251	0.0193207	8	16	25	49
FOSL1	2.62702	7.97449e-15	363	405	2574	1563
SUGCT	2.98319	6.46664e-19	266	200	1870	1309
NR2F1	1.56279	2.16557e-05	199	264	658	500
SFN	2.35049	1.46834e-06	31	33	129	162
ETV4	2.13159	8.00327e-09	237	262	829	993
BAIAP2	1.90234	1.8889e-06	791	799	1751	3091
CALCB	1.45942	0.000187691	126	124	362	225
C11orf16	1.55397	0.0388143	5	11	27	24
NUPR1	2.11127	0.00132411	16	6	57	41
GPX2	2.40515	1.14891e-05	17	18	115	67
FOXG1	1.74532	0.0323731	11	1	16	31
SPHK1	2.00604	2.98944e-05	34	52	207	112
BNIP3	2.16972	7.90148e-11	1141	731	4031	3023
ZNF135	1.86398	0.000397765	43	44	88	184
B3GNT4	2.58723	8.30927e-06	11	14	84	68
DMRTA1	1.15821	0.00493763	153	107	226	246
PLA2G16	1.20083	0.000392551	428	421	969	656
LMNB2	1.16472	0.0165982	538	665	515	1622
RNF152	2.50776	1.55121e-06	17	26	149	89
FOXL1	2.58036	1.21719e-10	59	77	400	319
BDNF	1.97391	1.93109e-05	56	49	151	201
NCKAP5	1.44529	0.000218097	120	147	337	276
LRRC37A3	1.3236	0.00901243	47	72	99	152
VSIG10	1.60893	3.60218e-05	993	434	1824	1740
TCIM	1.99358	9.85664e-07	1171	442	3465	2055
C19orf18	1.11596	0.011725	120	66	192	144
ZDHHC13	1.08153	0.0223867	360	222	277	686
EPS8L2	1.82684	5.74968e-07	502	630	1504	1815
ZDHHC22	2.53944	0.00401685	0	2	23	11
FAM210A	1.27922	0.000411365	1202	627	1966	1649
MAN1B1	1.15899	0.00644814	2072	2660	2731	5673
TGIF1	1.28872	0.00582274	1858	488	2002	2604
NIM1K	2.51916	0.000809713	10	2	21	61
CAVIN1	1.05389	0.000688131	6625	5965	12740	8777
ZBED2	3.61956	1.78352e-08	7	3	70	79
SLC25A22	1.26141	0.00544037	706	745	774	1984
RABEP2	1.09648	0.00349744	741	612	951	1346
ZNF491	4.65793	2.46357e-12	0	5	127	82
CSTF2T	1.34809	0.00263502	919	818	994	2508
PGBD5	1.29222	0.00685675	51	51	113	100
CD163L1	3.35196	3.03053e-06	6	1	65	38
NAALADL2	1.32622	0.0175542	29	30	89	46
CD151	1.02211	0.00276267	4924	6515	9504	9426
FAM20C	2.76459	1.16306e-12	160	291	1663	1102
ARL6IP6	1.13338	0.0123638	798	299	715	1181
ZNF354C	3.01062	0.000252704	2	1	29	21
RIC8A	1.10991	0.00529849	6496	6859	8068	14718
ADAMTSL1	1.90302	0.000220838	49	60	109	240
CALHM5	2.8351	1.06413e-13	82	68	478	448
ALS2CL	1.47522	0.000245682	164	201	365	470
GLDC	2.07811	0.000297472	19	18	63	82
GTPBP6	1.71165	0.00212147	98	98	100	436
THBD	1.60155	1.57669e-06	561	517	1710	1051
C5orf46	2.22574	1.76873e-06	39	48	255	123
MSC	4.52539	3.14837e-31	32	28	735	559
TRIML2	2.12003	2.74928e-10	390	449	1670	1404
FUCA1	1.0607	0.00848515	1394	754	1394	2126
LDLRAD3	1.01566	0.0240707	271	275	277	595
FAM156B	1.77015	0.0488136	0	0	0	14
WSCD1	2.92053	5.49126e-05	5	3	37	42
GATA2	1.11713	0.000962979	509	583	1102	856
KLHL28	1.04808	0.00515049	1396	843	1603	2060
HTR1D	4.44924	9.06633e-10	1	2	98	41
LSMEM2	2.26006	0.00588479	5	3	7	45
ARL14	1.91185	0.0315125	4	0	15	13
GIPC3	2.5977	0.000943675	2	4	32	23
ZNF154	1.2398	0.00166267	155	128	270	277
ANKRD18A	1.15979	0.00362705	164	189	452	227
TH	2.45925	0.00426789	1	2	21	14
F2	1.56937	0.0453756	6	7	34	12
NRIP1	1.11719	0.000718873	899	1046	2012	1484
HIST1H2AC	2.32125	8.18383e-10	176	103	648	536
HIST1H2BC	1.38018	0.0142843	54	21	71	95
MB21D2	1.35625	0.001053	232	178	333	511
MAB21L1	5.40033	1.13456e-19	3	7	159	400
CHRM4	2.27771	0.0125481	1	0	7	14
ARSJ	1.03936	0.00380996	1155	943	1494	1931
HOXC10	1.99535	0.0219158	2	2	15	13
GREM2	1.34251	7.19027e-05	844	642	1991	1167
OXTR	1.29323	0.000382851	341	325	922	471
NQO1	1.49037	1.9141e-06	6460	4965	14862	11511
F2R	1.6382	4.50765e-07	1927	2307	6334	4711
TMEM45A	1.21002	0.00122674	2323	1114	3216	3180
RAP2B	1.40442	0.00069003	7188	2413	12362	8740
ZBTB2	1.06603	0.00668427	336	325	452	653
C5orf30	1.76648	1.46041e-05	390	313	711	1226
SLC35C1	1.05555	0.00266465	1591	1961	2786	3180
CLDN7	2.09172	5.06902e-09	189	142	668	523
CHST15	1.88145	9.88282e-07	168	182	485	586
TDRKH	1.84129	3.93044e-05	132	92	241	420
EXT1	1.35182	8.8675e-05	2926	3169	5737	6841
SHMT2	2.11324	6.63192e-08	2145	1626	4903	8374
SYNM	1.16128	0.00181012	280	272	465	534
NXPH4	2.57892	4.92399e-05	11	7	74	43
BGN	2.85093	3.67611e-14	1555	1674	7716	11872
MXRA7	1.28405	7.64783e-05	1110	962	2575	1629
CSF1R	1.11237	0.0129862	94	103	148	200
NTM	4.04829	1.24761e-32	878	538	10484	9831
TSKU	1.632	0.000161778	1397	1344	2063	4759
PAPPA	1.85958	3.8463e-08	1943	2337	6296	6553
CRIP2	1.68651	7.88688e-08	7153	7610	23475	16343
ACBD3	1.04248	0.00778796	1892	947	2006	2611
ALG12	1.392	0.0034267	371	372	403	1155
WFDC10B	2.04392	0.0124374	4	3	16	23
EWSR1	1.01852	0.0101515	5890	3278	5686	8849
SPATA13	1.34891	0.00249392	72	61	149	136
PYCR1	1.08384	0.00289903	4719	3452	5740	7946
SLC8A1	1.69544	2.38154e-06	228	221	600	602
CAMK1D	1.09133	0.00128295	448	375	837	607
LYSMD4	1.05165	0.018468	240	250	266	540
FREM3	1.96554	0.0262818	1	3	5	23
BEGAIN	1.12848	0.00562968	113	151	288	201
RIPPLY3	2.09659	0.0060916	6	4	27	25
CHST6	2.09411	0.0124995	3	3	10	27
CCBE1	1.6394	2.57123e-06	349	278	814	789
OVCH2	2.14828	0.00471771	4	9	16	51
C19orf71	1.58347	0.0225025	11	14	24	48
RIPK4	3.6104	9.84373e-11	10	23	129	284
NPIPA1	1.1655	0.0121698	144	58	201	174
KLHL25	1.13686	0.0103563	237	354	369	680
GPR1	2.94651	1.425e-13	64	58	394	425
RFLNB	2.02471	2.27813e-08	866	602	3548	1650
TBL3	1.16282	0.00985987	1760	2055	1888	4860
FOXL2	1.83505	0.00324943	12	17	59	43
ANKRD45	2.81839	3.76037e-08	35	17	258	104
SMTN	1.17726	0.00822962	1354	1929	1794	4130
DIABLO	1.43631	0.00433782	36	44	101	88
TBX1	1.9708	0.0217042	1	4	16	16
IRAK1	1.08424	0.0209392	201	347	305	634
COLEC10	2.00476	1.57565e-05	37	49	182	128
ACTRT3	1.20133	0.00300646	141	105	235	229
TXNRD2	2.55369	4.68147e-08	29	30	173	143
TMEM255B	1.48494	4.41748e-05	244	173	546	423
CEND1	1.79865	0.00062737	27	45	95	127
SLITRK6	1.65808	4.6771e-07	650	513	1623	1397
TMEM173	2.98994	2.45295e-15	387	302	1875	2731
ZNF93	6.47653	5.82218e-29	3	2	323	374
CLDN6	1.42572	4.38095e-06	7141	6128	15739	13392
NDUFA6	2.10879	0.000649456	27	9	117	42
SORCS2	1.11169	0.0131018	125	133	171	279
IFNE	1.72622	0.0291686	3	8	23	21
FAM43A	2.60528	6.15297e-13	235	232	1695	833
GALNT17	2.00699	3.54703e-05	44	59	139	219
C12orf56	1.29108	0.00932376	59	37	126	78
NR2F2	1.47055	7.71225e-06	2457	2936	7691	4920
AHNAK2	2.99692	2.74599e-17	471	263	3013	2062
NDUFA4L2	2.66838	0.0022302	1	1	14	19
SHC4	3.92086	1.38468e-17	28	69	606	804
KRT79	3.23884	7.05567e-06	4	3	35	55
NTF3	2.86037	1.51176e-09	37	19	201	172
MYBL1	1.03955	0.0427692	41	48	92	66
ADAMTSL5	3.02015	2.68456e-10	34	22	176	236
CCDC190	2.11347	0.0190463	1	1	17	7
POMK	1.83768	0.000358029	55	46	99	207
SHOX	2.42417	0.00822576	0	0	21	2
CCIN	1.90492	0.00106171	13	30	95	62
RASA3	1.16258	0.00190503	709	829	1173	1596
NDUFA13	1.55097	0.00576898	33	19	73	63
GABRA5	1.69376	0.00532996	39	14	52	99
THBS2	2.66027	5.18813e-11	252	336	1213	1949
NF2	1.53958	2.36332e-05	4226	3052	7110	9833
CYP27C1	1.36507	0.000208372	259	288	781	425
HYAL3	1.83787	4.11078e-07	194	158	540	506
TRABD2A	2.34131	5.00053e-05	24	10	81	83
SPATA21	1.11762	0.0344593	58	32	76	87
MT1X	1.29216	0.00904903	54	41	131	73
TAF9B	1.08077	0.0239109	98	125	133	249
COL4A1	2.12129	1.01451e-10	3165	3806	13169	12197
NANOS3	2.38869	2.1696e-06	20	36	147	127
PLEKHN1	2.63399	3.62014e-07	50	118	275	671
PERM1	1.27012	0.0199458	39	29	64	76
SPRY4	1.9539	7.98085e-07	250	245	627	950
TRPV2	2.18584	1.01578e-07	614	700	1725	3220
THSD4	1.12823	0.00115557	411	432	766	736
MCRS1	1.0008	0.00662426	2953	2137	3327	4697
CARD9	1.52578	0.00870017	18	28	71	52
S100A3	1.5173	5.57323e-05	160	179	514	316
TMEM215	2.48391	0.000101661	9	11	90	35
NHS	1.26815	0.0187924	28	42	82	67
ZNF626	7.5872	5.45861e-27	0	0	456	241
CERKL	1.76474	1.78846e-05	78	93	307	199
SERPINA5	3.02671	3.3087e-05	2	6	33	55
LCTL	1.0993	0.00158348	343	283	610	489
FAM83G	1.44557	0.000608464	206	299	444	685
CCDC9B	3.43718	7.77623e-14	652	196	3225	4919
GOLGA8M	1.95652	0.0324716	2	0	27	1
S100A16	1.80999	0.0160457	7	6	31	21
ZNF563	5.52831	4.57105e-18	4	0	174	142
UTS2B	2.31846	0.00155743	7	4	42	25
CGB5	1.30836	0.0377987	11	45	80	53
TMEM120A	1.00022	0.00791293	206	161	342	262
CLDN4	2.57465	1.65184e-13	917	611	3580	3979
S100A13	1.23429	0.00346269	134	81	258	168
FAM180A	2.14098	0.00305302	3	13	60	26
S100A4	1.59784	5.67367e-05	225	217	836	343
TMEM63A	1.13926	0.00266105	361	365	555	730
ZNF493	1.37419	0.00274174	101	58	241	118
CD55	1.52469	0.00489823	89	24	196	96
NTNG2	1.79558	0.00806228	9	12	42	33
SLC6A9	2.04999	1.46857e-05	245	346	565	1484
AFAP1	1.5831	7.98511e-06	999	1200	2472	2919
LAMA2	1.02426	0.0113942	176	149	380	184
MMP1	5.1322	3.81168e-32	49	42	1043	1984
HRH1	3.31963	2.09878e-20	111	97	1165	691
S100A2	2.19634	6.0722e-08	80	59	312	239
ZNF700	5.77692	5.51581e-20	1	3	161	217
ARID5A	1.82985	4.48727e-07	340	296	844	1008
LAMB3	2.77421	2.14177e-08	25	32	143	213
SRGAP1	1.43473	2.932e-05	1346	1066	2447	2807
NOP9	1.06662	0.0138404	158	155	204	322
CASP4	3.86953	4.05884e-27	229	125	2667	1924
FUT11	1.25301	0.000190128	680	487	1307	978
ANXA4	1.03685	0.00186005	1935	1264	2881	2426
WDR5B	1.05536	0.0183717	198	176	212	405
SERTAD1	1.12556	0.000360001	1574	1508	3144	2379
ZNF441	4.4048	6.84164e-15	12	2	186	155
ZNF763	4.91687	1.81666e-11	0	2	109	52
SLC6A17	1.42786	0.0106546	47	21	70	87
ZNF682	3.19654	7.7841e-15	37	43	383	286
ZNF772	1.28833	0.00719399	71	58	108	152
UAP1L1	2.06568	2.82836e-08	164	167	553	605
C5AR1	1.34935	0.00131988	104	80	198	191
DIO3	1.40924	0.00933472	40	41	65	117
VEPH1	2.28946	3.42726e-07	54	34	230	154
MAP3K5	2.1231	3.32805e-09	165	136	655	463
PDGFA	2.19452	2.47785e-08	3979	1555	12931	8706
COL13A1	2.50349	4.16558e-11	157	92	726	496
SLC2A10	1.08487	0.00574205	224	195	318	397
MYO5A	1.86997	1.34251e-08	1067	741	3247	2275
ATG7	1.32776	0.00284697	651	789	868	2023
ZNF841	5.66364	5.88873e-18	0	3	186	123
MFAP5	1.12424	0.00155682	437	355	935	516
SERPINB2	1.76142	0.0482385	3	1	7	16
PDCD1LG2	4.06956	2.99133e-18	18	21	265	364
MAP1LC3C	1.23383	0.0421593	25	19	47	45
ZNF44	4.19211	3.41578e-29	45	42	825	629
FAM49A	1.08068	0.00551499	181	133	286	257
ZNF677	2.01618	2.35151e-08	157	173	612	518
ERO1A	1.07412	0.00266565	5216	2671	7172	6220
ZNF823	1.29049	0.0015667	312	249	423	674
FCHSD1	1.5405	0.00194366	232	270	284	902
S100A6	1.96539	7.39112e-06	169	86	637	256
FKBP1C	1.54185	0.00230625	169	61	187	359
CARD11	1.66891	0.00065286	38	54	119	135
ZNF442	4.19148	8.93043e-12	4	5	93	112
MT1F	1.24733	0.015999	44	59	161	62
ZNF69	7.82244	2.15373e-37	0	2	685	553
TXNRD1	1.1222	0.000846046	2291	1739	4753	2589
ZNF568	1.24819	0.0330326	41	25	46	86
YTHDF2	1.09892	0.00465585	2483	1573	2685	4147
GPN1	1.03911	0.00619791	3498	1659	4052	4383
ITGBL1	2.72791	1.97409e-06	12	13	79	86
SPANXC	1.79052	0.0465562	0	0	18	0
MMP17	1.72136	0.0011305	32	30	79	100
PAPSS2	1.67834	1.2166e-05	272	255	584	792
EGFL6	3.41611	8.45487e-18	56	47	661	355
APCDD1L	3.2494	2.17946e-16	70	43	578	388
ALPK2	1.34297	2.47626e-05	3010	2231	5966	4885
PAX9	2.17944	0.00502977	8	3	15	44
TOX	1.35398	0.000225963	636	380	1413	775
RUSC2	1.4677	7.30147e-05	828	746	1452	2048
GRK5	1.60836	3.79673e-05	284	296	592	849
PRMT6	1.06494	0.0126675	231	196	264	446
TGM2	1.63653	8.91079e-05	5104	5804	8911	18451
RAET1G	1.47926	0.0498592	6	10	27	21
SPRN	1.15816	0.0110387	88	96	139	197
PLPP4	2.64147	8.11769e-17	1472	1116	7905	5766
HSD3B1	1.92179	1.31633e-05	68	46	191	179
MAFB	1.90349	3.34816e-08	384	406	1610	930
GPRIN2	1.53677	0.0169519	11	26	42	59
TCEA3	2.11342	5.01519e-09	174	152	758	459
COL15A1	1.77051	1.14603e-05	153	144	353	482
SKIV2L	1.85854	0.0270096	7	1	12	26
VARS	1.60944	0.0313028	36	11	9	125
FAM155A	1.52154	1.05164e-05	421	433	1318	766
MICA	1.39654	0.0347159	21	10	44	33
HLA-E	1.96079	0.00225784	21	49	275	31
INSYN2B	3.88029	3.64079e-09	2	8	62	128
DCTN1	1.18884	0.00841051	2375	2789	2583	6726
C4orf47	1.72048	0.00328419	23	16	70	50
VIT	2.18855	2.65181e-06	47	44	153	206
MUC12	1.20067	0.0132942	63	49	149	76
ADGRG1	1.78161	0.00747709	17	30	26	124
SAMD9	3.688	2.74435e-14	13	18	242	160
KRT81	4.03439	4.03769e-19	15	29	379	327
RGL3	1.29908	0.000869876	154	206	376	361
ITPRIPL2	1.15212	0.000725622	1235	1587	3247	2033
OLIG2	2.19951	0.0141803	1	1	12	12
ATP10A	2.46968	0.000203347	6	10	65	36
FOXL2NB	2.07617	7.68864e-06	67	36	256	135
HLA-A	1.82465	4.10619e-06	128	138	358	427
VGLL3	1.35959	0.000517504	162	252	497	402
XKR4	1.77146	2.03742e-05	91	64	262	191
DIO2	2.66378	8.5237e-14	4184	2192	21540	13331
RTL8B	1.01453	0.0128518	212	156	260	335
CGB8	3.35944	9.1448e-14	26	24	233	241
VDAC1	1.31476	0.000273971	1776	1313	2639	3491
TMX2	1.02365	0.00415357	1323	785	1684	1740
LBH	1.31058	0.00238055	430	499	609	1237
S1PR3	2.13171	2.87041e-11	821	665	2970	2452
DDX47	1.68428	0.013266	24	9	27	71
KCTD11	1.75976	2.63557e-05	468	401	810	1570
NUDT19	2.10836	1.95699e-06	2862	778	7574	5878
AP1G2	1.04963	0.0399939	572	651	402	1583
ZNF90	3.67694	2.50227e-10	5	10	109	106
NAXD	1.37634	0.00649099	366	511	408	1429
SH3D21	1.71029	0.000697742	35	63	121	159
PPME1	1.89668	8.10442e-07	3787	4043	8972	14771
ARHGEF28	3.73564	7.42601e-14	10	30	279	262
FAM166B	1.53932	0.044898	8	8	14	34
FASTKD5	2.01592	0.0249816	16	54	73	504
KCNU1	1.82175	0.0462074	0	2	18	4
TNFRSF25	1.26221	0.00113133	3602	2412	9147	3359
FAM19A5	1.34321	0.0018915	85	111	285	150
FANCG	1.39525	0.009956	183	182	144	631
KRTAP1-5	2.00841	0.0267883	0	2	14	9
KRTAP1-3	2.25014	0.0140588	0	0	11	6
TRIM16	1.16725	0.000502448	997	1110	1939	1912
SLC12A8	1.83896	8.53426e-08	524	467	1396	1511
FADS3	1.00101	0.00445835	416	418	890	511
ZNF844	5.44789	6.62202e-19	3	2	217	127
ZNF469	1.90772	3.83697e-07	302	479	1257	1227
PGAM4	1.23677	0.00699076	82	62	129	151
ZNF717	2.04435	0.000209206	23	18	98	62
PROB1	1.22485	0.0427081	17	36	75	41
HSBP1	1.08124	0.00197914	1828	1461	2487	3052
AC092835.1	1.33463	0.0299679	30	14	50	49
HIST1H2BN	1.42663	7.08008e-05	210	198	537	382
CCDC188	2.47138	0.00270458	2	3	38	11
C12orf75	1.65	1.13137e-06	807	650	2498	1384
KIAA0040	1.0211	0.0280746	81	88	118	162
CCDC200	1.65182	0.000910868	90	72	128	292
ZNF737	4.53865	7.26148e-08	0	0	39	34
SHISA9	2.80476	1.80428e-08	27	16	151	130
TNFSF12	2.7385	1.58203e-05	21	3	94	76
ISY1	1.11185	0.018642	96	55	123	144
KRTAP4-7	3.26008	0.000299248	0	0	21	12
TDGF1	1.43392	0.0457406	16	7	45	19
PLEKHO2	1.65937	0.000793017	216	294	329	995
PISD	1.06841	0.0162031	1830	1526	1564	3923
MTFP1	1.06898	0.0447776	47	34	97	52
RTL5	1.45239	0.00527371	45	64	89	163
AP5Z1	1.49108	0.00097864	779	929	1097	2765
PTCHD4	2.20162	8.99391e-10	156	160	641	587
TWF2	1.03104	0.00105313	4029	3162	6517	5395
MARS2	1.93341	0.00120619	33	55	59	240
FMN1	1.43422	0.034669	13	15	56	21
TRMT9B	1.5652	0.000326899	124	85	384	162
PCDHA12	1.58861	0.000162936	141	156	293	441
SLC10A5	1.89455	0.0307969	2	2	14	12
EIF5AL1	1.00143	0.00870922	423	236	681	413
PCDHGB7	2.86888	2.57126e-06	8	10	93	52
EID3	1.88586	0.00392112	13	10	46	39
ZNF486	2.0655	0.00164656	34	4	107	56
ZNF350	4.51503	4.04001e-18	9	7	196	199
ZNF253	2.09724	0.0219222	0	1	9	10
TUBB3	3.37313	1.9196e-06	7	5	24	132
BLID	2.54973	0.00216773	2	2	19	22
CCPG1	1.19073	0.000346055	3714	2983	8349	4488
EPPK1	1.122	0.000984599	593	458	1165	734
BOP1	1.09311	0.000811541	1030	1125	2032	1731
SPON1	1.24105	0.00565635	100	127	177	263
MILR1	2.08846	0.00520772	8	5	54	15
ZNF595	6.27443	2.48613e-21	1	1	198	189
SOCS7	1.14634	0.00628473	237	165	284	426
FP565260.1	1.84993	0.000152892	206	166	280	819
SIK1B	1.94902	5.80227e-05	58	60	137	250
RAB7B	1.31075	0.000229921	392	292	687	690
ZNF670	1.06746	0.0197428	136	124	156	280
NEFL	2.24342	2.65693e-09	128	120	480	509
FO681492.1	2.15103	1.56705e-06	64	50	187	245
ZNF229	2.37475	0.000210893	5	19	73	61
AC106886.5	1.09146	0.0486535	42	26	70	55
EXOC3L2	1.16762	0.00408387	158	158	418	195
AC093512.2	1.4937	0.0249723	17	13	29	49
AC008676.3	1.87594	0.0155988	5	6	19	28
