# Supplementary material for: Single-cell profiling of lncRNAs in human germ cells and molecular analysis reveals transcriptional regulation of LNC1845 on LHX8
Source: eLife. 2023 Jan 5;12:e78421. doi: 10.7554/eLife.78421 (PMC9859043; doi:10.7554/eLife.78421)
Supplement: Supplementary file 9. [file elife-78421-supp9.xlsx]

## Sheet: CTR
Gene_symbol	log2(CTR/LHX8_P)	pvalue	LHX8_P_1	LHX8_P_2	CTR_1	CTR_2
C2orf83	-3.78909	0.0294764	27	12	1	1
ICAM3	-4.41109	0.0445416	20	10	1	0
CRYBB3	-5.38893	0.0322652	8	14	0	0
FAM189A1	-5.2559	0.042306	9	11	0	0
ZP4	-4.70588	0.0236591	22	15	0	1
SOX21	-6.02857	0.00611047	20	14	0	0
LRRC61	-5.87987	0.00989699	9	22	0	0
CHRND	-4.4329	0.0436831	8	23	0	1
CH25H	-6.1369	0.00456941	12	25	0	0
C1orf94	-4.80848	0.0187393	16	24	0	1
CLVS2	-4.82654	0.0255557	3	38	0	1
ESAM	-4.35278	0.0483017	14	15	1	0
KCNK13	-4.80707	0.0197457	12	28	1	0
ADCY8	-4.82888	0.0205888	32	8	0	1
TAGAP	-5.569	0.0220659	7	18	0	0
APLN	-5.62502	0.0194068	7	19	0	0
NINJ2	-4.82378	0.0184429	25	15	1	0
MAL	-6.33379	0.00232867	25	17	0	0
XCR1	-5.89491	0.0089848	18	13	0	0
SULT1B1	-6.15367	0.00430169	24	13	0	0
CD28	-5.46571	0.0270679	14	9	0	0
OR13D1	-5.18854	0.0486762	11	8	0	0
FAM69C	-6.20763	0.00659057	36	2	0	0
HLA-DQA1	-4.52874	0.0346433	12	21	0	1
TMEM26	-4.53346	0.0337333	15	18	0	1
CPLX3	-5.84345	0.0102536	15	15	0	0
KRTAP1-3	-6.14531	0.00419656	18	19	0	0
KRTAP5-9	-6.01026	0.00721152	8	26	0	0
BLID	-6.27564	0.00382983	6	35	0	0
LHX8	-6.0751	3.3738e-52	3674	3098	51	20
B3GALT1	-5.105	3.12101e-42	1774	2436	54	32
ADCY2	-4.72308	2.8351e-39	1651	1875	57	37
COL8A1	-4.05849	1.68948e-35	42045	45966	2386	1338
VIT	-4.83049	2.34374e-34	1157	1190	22	36
TRIM22	-4.25609	3.19051e-34	1817	1650	75	53
CNMD	-7.06661	1.21631e-32	972	934	1	9
ELMO1	-4.31271	1.65687e-31	1096	1105	41	37
NANOG	-5.31723	7.86784e-31	688	786	13	13
MAMDC2	-4.68161	7.83345e-31	3911	3752	155	56
MMP1	-4.95552	1.51934e-29	2093	1856	69	21
NMNAT2	-3.47601	2.17049e-26	2608	2775	138	202
SPX	-4.03713	8.67814e-26	913	857	42	34
LOXL3	-2.95839	2.79837e-25	11348	13276	1221	1008
SLC8A1	-3.14393	4.33275e-25	2505	2886	224	205
CPXM2	-5.48256	4.78962e-25	767	624	18	4
NTS	-4.97745	1.34106e-23	529	500	10	13
RASL12	-3.96655	1.33515e-22	813	878	28	48
NTF3	-3.55556	1.92177e-22	1063	971	69	53
ZIC2	-4.43199	2.06253e-22	4015	4792	228	60
SEMA6A	-2.72267	8.44791e-22	8618	9168	872	1023
RNF144B	-3.37071	9.66878e-22	2680	2850	245	132
MVP	-2.6723	1.0392e-21	7514	8070	844	876
FGF13	-3.00101	2.31701e-21	1674	1923	161	155
LAMA4	-4.09988	1.793e-20	990	1051	62	22
DPPA4	-3.48456	1.89357e-20	2147	2070	180	86
FAM20A	-3.6727	5.31289e-20	767	1015	37	61
REEP3	-2.89225	1.05614e-19	4856	6257	631	422
ANK1	-3.80583	1.48818e-19	542	632	27	32
F2RL2	-3.40239	2.22372e-19	2332	2250	209	97
SLC6A6	-2.66833	2.59909e-19	3120	2917	328	341
ITGA7	-2.86335	3.19271e-19	1734	1957	198	159
NPR3	-3.5434	1.17611e-18	1505	1551	130	55
CXCL8	-5.13099	1.85317e-18	349	348	6	8
PTCHD1	-3.81239	3.05847e-18	544	512	31	22
ACTN3	-6.44916	3.31217e-18	356	390	1	5
TRMT9B	-3.04632	4.33855e-18	1871	2393	137	225
OLFML2B	-4.35626	5.09082e-18	401	708	26	12
HAPLN1	-2.53665	6.39773e-18	7397	6969	991	755
SEZ6L	-3.57572	1.18577e-17	2361	2571	216	76
TNFRSF21	-2.6519	3.61239e-17	6913	6863	945	601
PROM1	-2.98116	4.17504e-17	1314	1222	91	135
SGIP1	-2.89469	4.38949e-17	1168	1164	126	95
CSMD2	-3.13066	7.41442e-17	1007	1068	105	62
COL26A1	-2.29023	7.37632e-17	15698	18014	2447	2400
ME3	-3.49555	1.09885e-16	492	550	34	31
VRTN	-9.02288	1.54639e-16	592	891	1	1
RASGEF1B	-2.64678	2.22378e-16	1431	1679	164	185
ZIC3	-5.28239	2.57585e-16	345	261	7	4
MAB21L1	-4.72888	3.54631e-16	281	360	11	6
TMTC1	-3.49463	4.37817e-16	496	530	27	37
CDH1	-2.3912	4.70526e-16	6351	6104	950	724
REEP2	-2.45165	5.90787e-16	2504	2844	376	312
DDAH1	-2.27173	7.45347e-16	15914	19587	2760	2409
SLC4A7	-2.42921	1.09056e-15	2182	2123	286	277
STEAP3	-2.7685	1.16327e-15	1098	1087	128	98
CDH13	-3.45176	1.31454e-15	6902	7346	706	214
TFAP2C	-2.60775	1.75293e-15	10416	12113	1654	950
ZCCHC12	-3.8146	2.0115e-15	383	622	18	32
IFI44L	-4.12182	2.15091e-15	318	376	11	17
SYNM	-2.70758	2.16417e-15	2017	1861	258	161
SLC39A10	-2.34038	2.7954e-15	5800	7866	902	992
NT5DC3	-2.23063	3.72446e-15	5439	6361	905	863
TNFRSF10C	-2.63523	8.76811e-15	1769	1692	239	154
PLP1	-4.54239	1.0302e-14	253	311	7	10
F13A1	-5.48358	1.18148e-14	272	236	3	5
FAM71F1	-3.9444	1.99463e-14	340	359	21	11
KLHL30	-3.76463	3.59821e-14	726	873	66	17
STOM	-2.29985	4.23857e-14	5134	5517	897	627
CCR1	-5.37534	8.44989e-14	206	267	3	5
MAP1LC3C	-3.49088	1.20498e-13	408	389	31	19
MTCL1	-2.42381	1.54067e-13	1921	2054	312	210
CBLN1	-4.39067	1.55097e-13	262	244	9	8
SLC4A11	-3.59974	2.10795e-13	686	809	68	19
SBSPON	-2.42825	2.99615e-13	1648	1337	178	213
BGN	-2.4311	4.73061e-13	8163	10367	1550	869
VWCE	-2.37075	4.90598e-13	1957	2304	346	234
CARD11	-2.78444	6.74195e-13	903	1272	142	80
CA2	-2.33921	8.08174e-13	4602	4672	491	797
AEBP2	-2.43483	8.56066e-13	3711	5318	731	443
TMEM64	-2.37849	8.83281e-13	1382	1452	223	161
DPYSL2	-2.25869	9.01963e-13	16541	18467	3206	1949
ILDR2	-3.63272	1.62472e-12	389	402	33	12
PLXNC1	-2.93748	1.75337e-12	433	526	45	43
WSCD2	-3.8118	1.80102e-12	258	281	13	14
SRSF6	-1.95205	1.83392e-12	16393	19459	3402	3114
YPEL2	-2.64294	2.50902e-12	1114	1090	161	88
ABCG2	-3.93922	2.63517e-12	443	476	7	35
SORL1	-2.57257	2.79187e-12	1121	1277	105	178
A2M	-3.06101	2.93546e-12	814	733	93	38
CFH	-4.45859	3.00141e-12	351	333	20	2
COBL	-2.82377	3.68664e-12	464	574	49	54
PLA2G16	-2.3909	3.82967e-12	3817	3491	635	349
CLEC18A	-3.43037	4.08727e-12	332	295	21	20
MMP7	-10.2033	6.85148e-12	736	942	1	0
COL5A3	-3.32896	8.05391e-12	431	481	46	18
ST6GAL2	-2.37146	9.70086e-12	1848	2118	342	198
ALDH4A1	-2.08508	1.38735e-11	2131	2550	352	423
C11orf88	-2.93675	1.40325e-11	412	414	42	34
PAX9	-5.73452	1.89163e-11	204	174	1	4
FGF2	-2.86982	2.15484e-11	683	800	99	44
C16orf54	-3.25095	2.19805e-11	300	363	29	20
ITGB4	-2.23536	2.33287e-11	1669	1570	199	285
CFTR	-3.44106	2.44472e-11	307	278	23	15
AMTN	-6.06635	3.20992e-11	218	162	1	3
TBC1D2	-2.19819	3.26597e-11	1188	1242	209	164
EPHA5	-4.50737	4.06148e-11	224	227	12	2
ENO2	-2.19703	4.53508e-11	1280	1270	225	167
GALNT17	-2.26339	5.99281e-11	873	1038	154	126
CD109	-2.69664	6.18282e-11	948	925	141	63
WLS	-1.80027	6.53367e-11	10254	10506	2031	2164
SIM1	-6.49301	7.0509e-11	190	194	1	2
SPOCK1	-1.97735	7.41429e-11	1935	1872	344	337
HIST1H2AC	-2.31256	7.71236e-11	822	1079	151	118
KLF9	-2.73474	7.84794e-11	433	427	47	44
HMCN1	-1.92085	8.78537e-11	2566	2622	514	451
2021-03-04	-2.53133	9.82646e-11	1877	1981	329	142
SORCS3	-4.72559	1.10053e-10	195	220	1	10
IL4R	-2.15785	1.12972e-10	2549	2982	544	329
GMPR	-2.02439	1.29355e-10	1846	1702	340	275
LCLAT1	-1.97551	1.5236e-10	1785	2250	368	353
HTRA1	-2.21298	1.61142e-10	18605	18730	3791	1893
GRPR	-2.95192	1.84255e-10	322	484	30	43
NEK10	-3.06789	1.95382e-10	283	337	28	24
PLAU	-2.89131	2.03776e-10	4335	4524	665	179
PDE4B	-2.07672	2.95777e-10	1163	1239	223	178
ABLIM1	-1.9883	3.0052e-10	4603	4945	1032	664
SALL1	-2.91454	3.01916e-10	931	752	118	40
EHD3	-2.0063	3.11655e-10	15269	16561	3500	2085
GRAMD2A	-2.33402	3.17101e-10	705	707	85	112
HTRA3	-2.00085	4.91512e-10	4554	4796	1019	628
P3H2	-2.17987	4.95975e-10	5768	6533	1272	642
FAM189A2	-3.05529	5.3774e-10	534	513	67	22
SORBS2	-2.7165	5.73437e-10	3360	3912	599	182
NR6A1	-1.81834	7.41524e-10	13286	15087	3303	2362
HES2	-3.37574	7.51177e-10	369	306	35	11
SFN	-1.89021	7.55115e-10	2236	2124	375	453
LYNX1	-2.42409	8.12913e-10	600	843	115	74
SGK1	-2.48513	8.35259e-10	1704	1608	297	121
ABCA1	-2.39587	8.36013e-10	16710	20224	3566	1383
IFNGR1	-1.82343	8.40771e-10	4144	3973	912	705
SYT14	-2.36097	8.49901e-10	1538	1770	310	144
SUSD6	-2.03325	1.01146e-09	4103	5142	999	591
PAN3	-1.74047	1.04208e-09	7568	8991	1894	1592
IL21R	-4.04844	1.04441e-09	144	234	6	10
HSPA2	-2.64789	1.40367e-09	528	421	67	40
NFASC	-2.38956	1.51598e-09	480	510	70	63
CLDN10	-2.4713	1.5686e-09	578	509	55	83
SYNPR	-4.89818	1.68377e-09	214	124	1	7
GRHL3	-3.47625	1.92142e-09	251	190	17	11
ZIC5	-4.94856	2.15849e-09	171	136	1	6
FGD5	-2.52432	2.29514e-09	547	720	102	53
RNF43	-3.88212	2.58371e-09	162	281	5	16
FAM171B	-2.44876	2.60325e-09	6030	7384	1283	450
MEF2C	-2.50628	2.79077e-09	836	887	150	64
SPRY2	-1.8101	2.97463e-09	1869	1829	394	349
SLC1A1	-3.00122	3.16677e-09	763	789	110	27
CHRNA1	-6.94926	3.78464e-09	138	214	2	0
LRRC17	-3.06071	4.03183e-09	765	793	108	24
LRRC3B	-2.55372	4.43295e-09	939	832	61	151
OAS1	-5.22814	4.96864e-09	134	132	3	2
DKK3	-2.09958	5.41449e-09	18895	17746	4131	1909
TMEM173	-2.67728	6.83013e-09	1214	1414	224	66
HLA-DRB1	-1.99334	7.14534e-09	1940	1880	426	251
PPARGC1A	-2.29847	7.28567e-09	507	477	77	64
PNMA2	-2.17446	7.31155e-09	558	577	90	87
RTP1	-6.81933	8.16832e-09	127	195	1	1
ANPEP	-2.67932	8.25333e-09	279	396	40	34
ABCA4	-1.9782	8.34601e-09	949	1155	164	211
VSTM2L	-2.78734	8.68911e-09	379	394	55	24
HDAC9	-2.86791	8.83282e-09	292	268	22	32
GALNT5	-2.36623	8.86305e-09	835	860	159	73
KIAA0040	-2.06095	9.2122e-09	1727	1895	398	214
ARL6IP1	-1.5808	9.62473e-09	8725	9215	2070	2150
AK5	-2.31393	1.17718e-08	2070	1568	364	154
ITGA11	-2.24139	1.21689e-08	16245	18396	3753	1417
AADAC	-4.6803	1.30031e-08	120	173	1	7
INPP5D	-2.00679	1.34073e-08	1676	1685	377	213
NCAM2	-2.54476	1.40663e-08	365	330	47	37
SOX9	-1.95338	1.44634e-08	3073	3695	793	438
SLITRK1	-3.93498	1.53629e-08	210	271	2	20
PALMD	-2.6897	2.09546e-08	374	385	57	26
AMER2	-3.77133	2.09322e-08	140	171	7	9
TMEM229A	-4.86027	2.08748e-08	139	149	7	0
DBNDD1	-1.82958	2.29233e-08	1227	1192	216	263
DGKA	-1.70621	2.34599e-08	3117	3335	807	586
CREBL2	-1.98649	2.38426e-08	752	778	153	119
TP53INP1	-1.65379	2.56803e-08	2447	2580	608	517
FBN2	-1.67613	2.57265e-08	11865	10676	2928	2050
SALL4	-1.75267	2.62552e-08	4822	5161	1272	816
GAL3ST4	-1.95067	2.62937e-08	761	848	162	131
IL17RD	-2.52171	2.65101e-08	772	723	135	49
GPRC5A	-1.9749	2.73905e-08	1138	822	168	184
CNNM2	-1.94799	3.1654e-08	931	1030	213	145
DCLK1	-2.69225	3.32375e-08	840	861	146	40
BMPR1A	-1.72559	3.86961e-08	5395	5978	1475	948
SPRY4	-2.13741	4.11318e-08	1752	1433	349	163
PPM1B	-1.73625	4.13851e-08	1682	1679	403	308
PHLDA1	-2.2985	4.26579e-08	7697	9004	1803	593
LRRN1	-1.5891	4.3142e-08	2924	3023	671	720
UGCG	-1.75821	4.58858e-08	17991	19293	4912	2859
HSPB3	-5.36663	4.95762e-08	135	99	1	3
VAT1L	-1.9417	5.68992e-08	2305	2167	539	283
HLA-DQB1	-1.81143	5.71285e-08	914	1006	205	180
KIT	-2.78127	6.37812e-08	642	602	102	26
MGLL	-1.88252	6.61798e-08	4073	4636	1095	570
TMEM40	-2.04636	6.61066e-08	968	650	153	124
OAT	-1.56952	6.77022e-08	8476	8130	2241	1704
GSKIP	-1.88318	6.81626e-08	1041	1036	237	160
TMTC3	-1.76909	7.12313e-08	3941	5300	1169	738
PLEKHO2	-1.81011	7.26944e-08	908	1173	218	199
FSTL5	-5.751	7.59955e-08	131	98	1	2
TMEM52B	-3.8788	8.34728e-08	187	104	7	7
MPZL1	-1.52281	9.07395e-08	14274	15246	4080	3156
TFAP2A	-1.52378	9.11187e-08	4015	4602	1028	1079
SLX4IP	-1.60396	9.15259e-08	2778	3072	760	595
TRPV4	-1.9654	9.92813e-08	722	835	114	166
ADAMTS5	-2.06471	1.03777e-07	827	749	170	96
ZFP36L2	-1.76556	1.07745e-07	4362	4832	1211	695
PRSS23	-1.74803	1.08123e-07	27184	25640	7135	3968
TLL1	-2.91411	1.12464e-07	368	206	36	18
LMO2	-2.73226	1.16072e-07	618	575	101	26
TSPAN11	-1.90271	1.19631e-07	2003	2132	513	267
RUNX3	-3.08579	1.31084e-07	146	315	21	17
NABP1	-2.13497	1.31409e-07	7331	8536	1874	675
RUNX2	-1.90372	1.45499e-07	707	716	153	115
UCN2	-2.31283	1.49769e-07	625	900	152	64
GLDC	-2.17627	1.60163e-07	372	458	60	69
DNAJC6	-1.73639	1.91622e-07	1168	1143	212	276
NBL1	-1.97003	2.07431e-07	2413	3059	676	308
CBFB	-1.6572	2.16323e-07	1630	1901	453	335
BTG2	-1.63217	2.18141e-07	2660	2785	735	503
NUDT19	-2.11318	2.30892e-07	9526	10936	2475	863
NLRP12	-3.71364	2.31747e-07	135	260	3	18
CHST7	-3.65389	2.38463e-07	226	273	26	2
MMP19	-1.91226	2.43591e-07	2101	2041	523	254
NR4A3	-4.89337	2.45846e-07	97	114	4	1
KIF3C	-1.60815	2.46262e-07	2252	2585	645	472
CELSR3	-1.7151	2.70903e-07	993	1322	235	260
CD47	-2.05622	2.7985e-07	1439	1783	383	163
MSMO1	-1.41844	2.80562e-07	9530	9091	2433	2474
GCM1	-5.75817	2.8119e-07	64	169	0	3
MMD	-1.63296	2.85196e-07	1603	1829	445	334
TMEM41B	-1.63055	2.92236e-07	3265	4209	1009	689
PIM1	-1.51895	3.54439e-07	2021	1987	500	485
PLPPR5	-2.60762	3.66577e-07	273	280	43	21
DRAXIN	-1.87433	3.80139e-07	640	645	141	106
CTSK	-1.68785	4.0206e-07	1154	1020	262	214
HKDC1	-3.14038	4.34234e-07	181	194	22	8
ELN	-3.0731	4.36392e-07	151	196	18	11
OSGIN2	-1.76433	4.50816e-07	1359	1108	307	206
SYT17	-2.12265	4.53409e-07	917	1015	222	91
DCUN1D4	-1.56044	4.77931e-07	3035	3919	951	707
PAM	-1.44521	4.99079e-07	5903	6915	1818	1494
HSD3B1	-1.87544	5.00192e-07	1113	1065	271	148
RNF146	-1.49847	5.26789e-07	2525	2756	727	589
MRGPRF	-2.07894	5.50684e-07	531	718	135	73
MATN3	-1.63352	5.79611e-07	1133	1287	307	242
CDCP1	-2.17275	5.84164e-07	1367	1429	326	112
TRPV2	-1.75631	5.91055e-07	2626	2840	747	394
ITGAV	-1.66833	5.98538e-07	17660	17141	5022	2707
GJA1	-1.42006	6.69564e-07	15034	16057	4636	3548
SNX18	-1.66299	6.86497e-07	1654	1724	459	293
SLFN11	-3.80918	6.89475e-07	134	144	12	2
TCEA3	-2.31267	6.90687e-07	607	667	134	47
FZD7	-1.47268	6.97026e-07	2687	2878	778	634
KCNC4	-1.9005	7.53647e-07	1405	1414	362	171
RCAN3	-1.54368	7.53108e-07	1337	1595	355	352
IGFBP2	-1.57187	7.62449e-07	16163	17349	4975	2972
FOXI3	-2.40515	7.72017e-07	254	250	33	34
COL9A2	-2.03255	7.87458e-07	473	612	71	115
S100A4	-1.97058	7.92375e-07	1280	1070	290	134
GGNBP2	-2.3779	8.05352e-07	749	2404	146	276
KCNS1	-3.95521	8.17471e-07	123	163	12	1
KCND1	-1.81263	8.97008e-07	546	613	111	121
SDC1	-1.75168	9.2347e-07	7460	7815	2168	1033
ARSB	-1.64416	9.28369e-07	5895	7541	1926	1100
MYEOV	-3.02953	9.31242e-07	330	328	49	8
GPRC5B	-2.09462	9.3326e-07	487	566	60	113
FHL1	-1.95566	9.37102e-07	5799	5539	1501	565
ART4	-2.26547	1.06075e-06	415	347	74	38
SIX1	-4.9367	1.09431e-06	3038	3021	117	23
SLC2A12	-1.9748	1.11295e-06	645	495	125	80
PAX3	-2.39283	1.12991e-06	269	230	34	33
ADA2	-1.52025	1.16501e-06	2417	1959	589	488
RHOB	-1.50014	1.16978e-06	4185	4936	1343	927
KIF5C	-2.11826	1.22438e-06	1261	1590	344	119
NECTIN1	-1.69499	1.235e-06	2021	1919	550	309
HRH2	-2.50279	1.33353e-06	192	260	28	28
AOC2	-3.13811	1.35283e-06	127	161	13	10
NPFFR2	-2.01254	1.37295e-06	376	422	61	78
GPC4	-1.6333	1.38024e-06	4765	5214	1466	802
PPME1	-1.48634	1.3924e-06	16834	18173	5374	3432
MAN2A1	-1.46264	1.42238e-06	6165	6526	1925	1320
C5orf15	-1.68184	1.52878e-06	2738	2833	800	425
SSH2	-1.555	1.54248e-06	1705	2061	529	373
THBS2	-2.5942	1.55085e-06	682	545	118	26
DLD	-1.37034	1.60609e-06	3814	3988	1130	995
UGT3A2	-2.54769	1.62164e-06	277	186	32	24
TMEM178A	-1.81456	1.668e-06	518	537	97	114
AP1S2	-1.73693	1.70752e-06	663	604	144	124
CALCOCO1	-1.36365	1.72538e-06	4469	5309	1394	1278
NOVA2	-2.59916	1.81454e-06	213	359	20	46
FOXC2	-2.3156	1.89522e-06	1142	1354	282	72
ARL14	-8.00858	1.98895e-06	55	80	0	0
PLCH1	-2.70475	2.00876e-06	209	256	14	36
SOX3	-5.97527	2.02617e-06	81	98	1	1
SCD	-1.51888	2.0587e-06	10145	9761	3064	1838
SPP1	-1.9503	2.08596e-06	6369	6278	1717	596
STK10	-1.55031	2.11941e-06	4282	5104	1409	848
ECM1	-2.04002	2.31455e-06	4163	4755	1167	364
MYOCD	-2.76756	2.45599e-06	279	417	59	13
APCDD1L	-4.59266	2.45481e-06	1718	1831	86	18
SSH1	-1.56305	2.54996e-06	1428	1379	397	273
OXER1	-2.40749	2.57647e-06	190	325	32	36
OXTR	-2.10666	2.63744e-06	825	883	207	73
SYT11	-3.09346	2.68027e-06	130	161	16	8
DTNA	-1.60676	2.68026e-06	845	810	209	174
TMEM158	-2.45563	2.74359e-06	256	336	54	22
PARD3B	-1.50612	2.76136e-06	1272	1489	382	302
PIEZO2	-1.57069	2.89814e-06	808	872	203	195
F2R	-1.66538	2.97172e-06	7883	6630	2164	1071
NECAB1	-1.5428	3.0617e-06	2067	1743	379	542
TBX15	-4.7098	3.09608e-06	1663	1741	77	15
CRYAB	-6.6777	3.09777e-06	382	348	0	5
EDIL3	-1.46723	3.11119e-06	5053	4938	1552	997
A4GALT	-2.87003	3.15847e-06	155	146	14	15
SERPINI1	-2.25114	3.18521e-06	343	304	64	32
LEPR	-2.10708	3.38844e-06	461	390	47	92
CDKN1A	-1.45592	3.40677e-06	6424	5913	1926	1248
HR	-2.88885	3.40826e-06	122	195	14	16
RNF182	-2.15264	3.60444e-06	292	283	39	52
PTCHD4	-1.67622	3.6218e-06	1201	1163	332	190
CPEB2	-2.00931	3.64257e-06	323	329	56	58
CNTNAP2	-1.53318	3.69454e-06	2183	2037	630	399
EFHD1	-1.6111	3.73612e-06	3782	3934	1172	610
ARPC5	-1.50284	3.77231e-06	7286	7394	2308	1346
CX3CL1	-2.02969	4.18223e-06	304	440	74	54
RFTN2	-1.72407	4.24503e-06	531	707	119	144
IFI44	-4.6362	4.29973e-06	59	119	1	4
ENO3	-1.34843	4.72923e-06	2134	2200	593	605
FGD4	-1.54025	4.724e-06	1386	1642	442	291
ATP6V1B2	-1.3283	4.76065e-06	5060	5502	1660	1302
PODNL1	-2.47292	4.77269e-06	179	208	23	26
CLDN23	-4.81553	5.00891e-06	73	87	3	1
CAPN12	-1.54949	5.08237e-06	857	1132	222	255
NOCT	-1.5239	5.09631e-06	2637	2613	808	480
PGF	-1.95277	5.25428e-06	1726	2049	512	176
MPC2	-1.66961	5.25605e-06	1480	1523	438	228
CERKL	-1.87094	5.33416e-06	574	656	156	81
PRKCA	-1.50545	5.46482e-06	1153	1649	372	321
SUSD1	-1.47753	5.47677e-06	1533	1685	479	335
SLCO2A1	-2.20989	5.62927e-06	934	811	209	58
GLIS1	-2.669	5.65647e-06	265	193	38	13
ZBTB41	-1.422	5.78894e-06	1546	1557	455	361
ALPK3	-1.50638	5.98836e-06	1718	2133	577	377
SCPEP1	-1.33008	6.11844e-06	2253	2499	695	635
KCNE1	-2.48538	6.12203e-06	158	233	25	24
TSPAN33	-2.05945	6.29204e-06	341	273	58	46
IRF2BP2	-1.35878	6.33637e-06	7460	8384	2567	1784
WASF3	-1.4548	6.70975e-06	1927	2632	674	495
CPE	-1.37385	6.91641e-06	1936	1699	510	479
TMEM59L	-1.74896	7.08696e-06	1333	1527	412	188
TNC	-1.36758	7.32826e-06	11654	11654	3840	2530
STON2	-1.38819	7.32921e-06	8381	9526	2923	1896
BCL2L11	-1.54128	7.31956e-06	703	799	186	177
OTX2	-4.52193	7.45191e-06	94	69	1	4
C18orf54	-1.57083	7.64581e-06	1648	2018	553	316
WSCD1	-2.64509	7.64235e-06	133	206	18	20
PODN	-5.12905	7.67881e-06	74	75	2	1
CPEB4	-1.65864	7.74251e-06	668	671	178	121
RCAN1	-1.49907	7.75826e-06	4913	4942	1580	880
TRIML2	-1.70942	8.07374e-06	5563	6554	1847	766
ADGRL2	-1.2837	8.14211e-06	3175	3122	950	872
PCDH1	-1.71687	8.19147e-06	1520	2090	524	249
CPM	-1.72723	8.33849e-06	763	1236	264	160
SDCBP	-1.2352	8.37865e-06	8687	8888	2796	2462
SDC2	-1.61274	8.38846e-06	1954	1959	597	306
SYT6	-2.21347	8.47224e-06	230	272	30	46
PIP4K2A	-1.61351	8.49901e-06	16571	17273	5376	2431
SHANK2	-1.71041	8.64172e-06	529	460	102	111
BMPR1B	-1.95002	8.69159e-06	381	503	104	57
SLC17A9	-2.12111	8.94287e-06	553	687	151	50
SIX4	-1.72252	8.96193e-06	467	584	128	96
LYST	-1.76795	9.07153e-06	660	697	183	98
DYSF	-1.66687	9.17276e-06	2226	2460	713	328
OPRK1	-3.57793	9.23684e-06	135	155	1	16
LEMD1	-1.79949	9.32769e-06	554	392	100	92
SRGAP1	-1.72652	9.46986e-06	4150	5016	1390	563
TRIM71	-1.42296	9.4826e-06	1102	1325	301	335
TIMP2	-1.42404	9.69357e-06	6509	6992	2220	1327
LLGL2	-1.26038	1.01987e-05	3646	3755	1039	1135
MOB3B	-1.47273	1.03893e-05	1137	1715	373	348
DLX1	-1.70051	1.04042e-05	587	509	138	100
SOST	-5.09566	1.04111e-05	61	85	2	1
NACAD	-1.38382	1.04226e-05	1758	2133	594	455
MEGF11	-3.91684	1.07536e-05	73	142	9	1
GSDMD	-4.79687	1.08063e-05	259	13	3	4
CLEC18B	-2.29209	1.08901e-05	213	260	44	24
FNDC4	-1.36446	1.11459e-05	1853	2056	607	462
CACUL1	-1.2669	1.16054e-05	14998	16221	5243	3895
IL13RA1	-1.39122	1.19414e-05	2264	2377	742	505
TINCR	-2.97323	1.20303e-05	164	147	22	6
NPR2	-1.48271	1.2234e-05	914	1023	279	209
LEFTY2	-2.18544	1.24784e-05	348	315	73	30
TMEM123	-1.3485	1.28911e-05	1656	1596	415	484
ZDHHC22	-5.69708	1.33048e-05	76	71	2	0
FSTL1	-1.33785	1.36822e-05	44143	43685	15008	9501
SLC7A8	-1.67052	1.38488e-05	1775	1663	524	239
CACNA1B	-2.00261	1.42577e-05	351	411	90	44
RIPOR2	-1.76714	1.46231e-05	581	518	145	83
SERPINA5	-2.92099	1.46414e-05	130	117	13	10
CTSV	-1.25393	1.49073e-05	3987	3929	1073	1263
KCNE1B	-2.17704	1.5158e-05	207	230	36	32
TMEM169	-2.08883	1.57156e-05	309	312	69	34
ASAH1	-1.41011	1.5798e-05	968	992	247	272
CA8	-1.61236	1.58332e-05	644	513	134	133
MCAM	-1.54617	1.60446e-05	1139	932	304	197
CACNA2D4	-2.94851	1.65611e-05	114	139	8	15
PGPEP1	-1.56325	1.747e-05	1779	1746	556	286
PTPRE	-1.51927	1.75692e-05	632	708	178	151
TOM1L2	-1.22633	1.85818e-05	5201	6305	1633	1822
KIAA1755	-2.13323	1.92634e-05	891	820	220	56
USP31	-1.42448	1.98827e-05	1785	1936	601	376
MAP1LC3A	-1.44995	2.02591e-05	1720	1881	580	349
SYNGR3	-1.62042	2.05392e-05	451	515	114	107
RAB33B	-1.37793	2.0691e-05	1439	2112	502	457
MAST4	-1.33489	2.1111e-05	1270	1584	397	398
SHISA2	-1.786	2.15875e-05	2925	3667	1002	346
TNFRSF10A	-1.76205	2.17327e-05	1065	1219	338	137
ZNF516	-1.73279	2.27683e-05	5530	7086	1969	707
ENPP5	-2.22717	2.28719e-05	204	277	25	47
DLC1	-1.36511	2.31968e-05	7079	7751	2547	1511
DAPP1	-2.4749	2.33759e-05	167	180	29	15
MYOF	-1.21127	2.35758e-05	3742	3909	1250	1077
SC5D	-1.4712	2.40804e-05	3973	4162	1364	706
RAB3D	-1.62345	2.45976e-05	2398	3162	881	390
MAP3K7CL	-2.06806	2.50236e-05	587	624	157	47
OSBPL3	-1.90134	2.53331e-05	1758	1939	539	160
COL7A1	-1.31698	2.58134e-05	14072	16247	5275	3297
TOB1	-1.2281	2.60803e-05	11476	12991	4237	3117
BBS9	-1.50293	2.63882e-05	886	664	187	199
GCLC	-1.58685	2.65691e-05	1046	1109	333	173
ETV1	-1.98616	2.67008e-05	240	295	55	40
ANKRA2	-1.33354	2.683e-05	1867	1807	598	430
FAM155A	-1.40913	2.69138e-05	886	806	226	223
CELF2	-1.31285	2.79395e-05	1291	1336	350	394
ASB9	-3.18636	2.823e-05	120	86	10	6
JAKMIP2	-1.4821	2.8412e-05	1038	949	305	197
ABCG4	-2.3597	2.84824e-05	137	296	29	30
RGS1	-4.54821	2.89714e-05	64	69	2	2
EPHA1	-1.44703	2.96682e-05	1015	1163	227	334
GRB14	-1.6662	3.03038e-05	463	533	134	87
MTUS1	-1.70135	3.08215e-05	642	810	106	207
CKB	-1.56537	3.16122e-05	2661	2756	891	401
MYD88	-1.78331	3.15931e-05	2111	2221	666	223
FZD8	-1.7298	3.16217e-05	750	873	239	106
CLDND1	-1.25971	3.19359e-05	4283	4594	1531	1081
KCNK12	-2.59078	3.22939e-05	114	187	15	20
SVIL	-1.36764	3.23094e-05	6361	8150	2485	1473
FAM49A	-1.66392	3.35046e-05	753	783	229	113
TMEM132B	-2.39734	3.40176e-05	155	198	17	30
TLL2	-2.41436	3.63203e-05	238	194	15	42
FRMD4A	-1.3038	3.66151e-05	1296	1633	445	389
PPP2R5B	-1.3945	3.68288e-05	1563	1971	577	369
POU2F2	-1.76785	3.72314e-05	1094	1286	360	133
LGR4	-1.34308	3.7827e-05	1524	1597	513	354
RMND5A	-1.46919	3.81241e-05	3033	3984	619	1157
SATB2	-1.93493	3.86594e-05	293	298	69	40
BMP7	-1.38794	4.01051e-05	856	1106	289	238
FAM131B	-1.72543	4.16049e-05	331	388	86	67
PLEKHG1	-1.67311	4.2527e-05	443	471	124	78
BNIP2	-1.29115	4.42979e-05	2671	3038	982	661
TRAM2	-1.53621	4.48937e-05	6129	6280	2118	903
BICC1	-1.68476	4.49155e-05	5707	6337	1968	677
TMOD3	-1.23322	4.51842e-05	2527	2479	846	655
PREX1	-2.19036	4.53663e-05	197	172	29	28
CHI3L2	-3.18645	4.7059e-05	114	93	4	12
INA	-1.77183	4.70922e-05	2161	2050	659	213
SERPINE1	-1.61642	4.74857e-05	18443	16616	5899	2188
MFAP3L	-2.31038	4.75921e-05	362	275	72	19
CXCR4	-1.93588	4.84208e-05	304	386	86	41
SH2D5	-1.8773	4.86721e-05	311	293	72	44
RGS9	-1.54689	4.96357e-05	784	929	266	147
RRAS2	-1.17943	4.98479e-05	3634	3480	1207	1007
HECA	-1.39872	5.14236e-05	659	743	188	186
ST8SIA2	-1.86348	5.17683e-05	1176	1381	382	114
HECTD3	-1.17844	5.24478e-05	2917	3051	1006	851
PRNP	-1.20728	5.26031e-05	3146	3401	1133	864
RNF11	-1.19688	5.31042e-05	3082	2970	1033	828
TRIM9	-2.55537	5.42711e-05	130	137	19	13
SH3BGRL2	-1.17682	5.53117e-05	2242	2410	732	716
RNF38	-1.23661	5.59988e-05	1427	1488	458	413
SLC43A2	-1.75314	5.71699e-05	790	746	231	91
AADACL3	-7.34949	5.86202e-05	21	65	0	0
GNG4	-1.47261	5.94517e-05	551	682	140	172
ARMT1	-1.24806	6.0249e-05	1295	1278	393	370
BMP2	-1.95993	6.22144e-05	585	498	149	48
TMC7	-2.71267	6.39169e-05	132	128	20	8
SORCS2	-1.49755	6.48202e-05	481	632	149	128
GJD2	-3.98497	6.70141e-05	8276	10216	698	127
DLX2	-1.32844	6.75255e-05	1154	1187	385	272
RGS20	-1.92813	6.83887e-05	235	284	59	37
USP35	-1.33085	6.93749e-05	840	958	275	228
BAK1	-1.21188	6.95961e-05	5880	6738	2276	1560
SP4	-1.35112	7.05651e-05	925	969	224	298
HIST2H4A	-3.23613	7.05848e-05	52	164	9	7
FIBCD1	-2.39639	7.0671e-05	155	310	46	16
SHC4	-4.55352	7.06942e-05	804	788	42	6
KIAA1522	-1.21525	7.0735e-05	1861	2279	685	569
BEAN1	-1.78412	7.08414e-05	254	369	68	59
CPNE8	-1.48961	7.29303e-05	5154	6539	2036	898
PFKFB3	-1.21014	7.29971e-05	3576	3528	1266	899
LGALS16	-7.21998	7.30388e-05	36	42	0	0
BIRC2	-1.30564	7.64058e-05	5147	5068	1852	1064
ATCAY	-1.87034	7.86067e-05	1132	1012	323	92
CSPG4	-1.13077	7.9986e-05	3372	3857	1122	1199
ADGRF2	-4.86339	8.05739e-05	45	80	0	3
MLXIPL	-3.96534	8.07684e-05	74	59	2	4
EPS15	-1.15155	8.1984e-05	2332	2314	760	713
GPR19	-1.51167	8.2319e-05	531	447	130	112
AFAP1	-1.24752	8.28343e-05	3128	3275	1151	750
ERMN	-5.36364	8.35105e-05	64	53	0	2
CORO2A	-1.15915	8.67716e-05	2029	2285	704	655
CIPC	-1.29136	8.67833e-05	895	874	254	255
GPM6A	-4.51591	8.71386e-05	76	54	0	4
ADGRL4	-2.86955	8.81384e-05	123	84	9	11
TPBG	-1.1931	9.07477e-05	2035	2116	718	561
SHC1	-1.08015	9.12199e-05	7517	8360	2623	2659
ADAM33	-1.28269	9.15376e-05	2230	2865	591	878
SHC3	-2.39987	9.19141e-05	160	154	29	13
TINAGL1	-1.57171	9.22144e-05	2218	2303	772	302
CDH6	-3.44879	9.24716e-05	4415	4367	460	109
LPL	-1.51634	9.25317e-05	661	695	123	210
DPPA2	-5.35095	9.29113e-05	49	67	2	0
KATNAL2	-1.64972	9.4913e-05	347	399	69	98
JPH4	-1.72892	9.57033e-05	286	308	56	70
FAM129B	-1.156	9.60534e-05	5010	4844	1788	1330
PTPRZ1	-2.6866	9.76716e-05	132	114	19	8
ITGB5	-1.0739	9.8198e-05	10051	9632	3418	3170
TBC1D9	-1.40892	0.000101057	1687	1688	590	307
SLC2A10	-1.56523	0.000102253	760	698	232	116
GDF10	-3.26842	0.000103278	149	109	18	1
KCNN4	-3.22173	0.000104332	74	99	4	9
CRIM1	-1.41855	0.000106867	29574	34460	11707	5185
CD36	-3.67453	0.00010703	83	62	2	6
TMEM47	-1.28132	0.000108294	1302	1364	458	315
FADS3	-1.60048	0.000109258	2405	2874	901	327
MAT2B	-1.18264	0.000110474	2902	2920	1050	758
TM4SF18	-2.96634	0.0001114	140	125	21	3
ARHGAP40	-6.1536	0.000113573	183	328	0	5
MICAL1	-1.15024	0.000113869	4831	5673	1913	1418
DCBLD2	-1.5927	0.00011445	26137	27499	9425	3138
GM2A	-1.36151	0.000116131	2764	2644	977	509
LOXL2	-1.30729	0.000116508	28523	31300	11231	5816
SLC16A4	-1.40959	0.000117585	1027	1075	357	201
PAQR8	-1.22311	0.000118475	1960	2187	521	727
PIK3C2A	-1.09294	0.000119076	3455	3657	1216	1131
PRPS1	-1.2229	0.000120988	4014	3463	1360	902
MKKS	-1.6594	0.000122546	304	306	71	65
TNFRSF11A	-2.76909	0.000123675	85	139	8	15
TTC7A	-1.32675	0.00012511	1266	1665	502	320
UPK2	-2.22532	0.000126529	123	224	28	24
CCR3	-6.44885	0.000128813	66	58	0	1
EPDR1	-1.6898	0.000129402	880	748	259	98
NANOGP8	-6.47761	0.000129731	81	45	0	1
PARVG	-2.77727	0.000130717	108	96	13	8
PDGFRL	-1.41023	0.000132014	744	714	236	151
TBXA2R	-1.54148	0.000132499	819	881	281	131
VAMP1	-1.34178	0.000132745	680	955	241	212
ADAP2	-2.13804	0.000132778	149	196	23	32
SSTR1	-2.70778	0.000133083	122	91	10	13
CASQ2	-4.11288	0.000133346	65	58	1	4
CYP1A1	-2.05184	0.000133568	161	199	29	32
SULF2	-1.30271	0.000133781	4247	4326	1593	859
IPMK	-1.94383	0.000136434	204	200	41	33
DOCK10	-2.39524	0.000136588	254	214	52	11
SLC13A4	-1.34732	0.000136541	644	864	194	222
FAS	-1.57719	0.000138357	1549	1999	605	233
KRT80	-1.59136	0.000147184	530	555	169	85
CARD10	-1.23147	0.000148289	1667	1870	632	429
LIF	-1.52551	0.000149259	1323	1763	529	226
LMX1A	-2.66311	0.000151153	142	147	6	26
PNMA8C	-2.00406	0.000154427	369	467	115	32
PTX3	-1.90461	0.000156357	295	256	71	33
LIPH	-2.58742	0.000157192	83	209	22	12
TNFSF12	-2.13958	0.000158536	173	158	32	21
BMF	-1.1781	0.00015868	3634	4301	1012	1450
ITM2B	-2.04377	0.000158898	156	196	31	29
PAQR3	-1.30854	0.000162092	850	698	232	209
SH3BP4	-1.35916	0.000163995	4356	4639	1676	798
JCAD	-1.12067	0.000164414	1883	2132	677	622
ATG4A	-1.27273	0.000166356	1116	1101	383	264
EML1	-1.14538	0.000168635	1663	1585	495	539
ATP6V1A	-1.17129	0.0001742	2136	1999	745	550
LRRFIP2	-1.18806	0.000174663	1684	1786	622	451
TMOD1	-2.8143	0.000176485	113	106	17	5
EIF5A2	-1.70861	0.000176642	956	954	312	101
DNM3	-1.66178	0.000176591	296	406	95	61
FLVCR2	-2.45433	0.000178318	100	142	16	15
IMMP2L	-2.33186	0.000179728	142	122	21	16
ZDHHC13	-1.26986	0.000179868	718	881	231	235
SNX33	-1.16149	0.000181688	1841	2271	725	568
PELI2	-1.39541	0.000182156	535	542	127	161
PFKFB4	-1.48874	0.000187286	1853	1923	675	275
GABRE	-2.165	0.000189663	293	297	75	18
CPQ	-1.89098	0.000190446	216	290	63	33
LYPD1	-1.82873	0.000193076	567	661	188	56
TMEM87B	-1.17488	0.000194842	1718	1696	613	453
MMP15	-1.11388	0.00019545	1784	1849	622	560
FAM198B	-1.38857	0.000196726	1774	1715	634	307
SCARB2	-1.06946	0.000197103	3417	3200	1151	1071
DGKQ	-1.1123	0.000199203	1822	2065	667	598
FAM220A	-1.51428	0.000202922	332	416	92	92
ID2	-1.23611	0.000204117	1882	1984	714	443
CD248	-1.15594	0.000205048	4806	5750	2001	1334
WNT5A	-1.55149	0.000205768	13558	18028	5690	1906
SLC26A6	-1.23367	0.000206741	2884	3801	1237	763
FAM69A	-1.44688	0.000207179	460	406	118	106
PABPC1L	-1.06241	0.000210184	5313	6339	1824	2096
CTDSPL	-1.17007	0.000214489	4090	4484	1638	1047
PIGK	-1.24221	0.000219503	1122	1232	416	285
PAMR1	-1.52012	0.000222265	7157	6632	2526	874
PSTPIP2	-1.52128	0.000224012	3469	3283	1226	437
TP53I11	-1.10172	0.000224046	4203	4815	1278	1674
GPR68	-1.5372	0.000225488	344	332	78	86
OCLN	-1.82366	0.000225923	246	263	36	65
RASGEF1A	-1.18408	0.00023516	985	996	320	294
CPT1C	-1.1354	0.000238004	1299	1493	465	429
EOGT	-1.24936	0.00023836	1019	1155	382	262
SAT1	-1.51235	0.000242881	9322	9890	3551	1206
STOX2	-1.24005	0.000242843	756	927	268	233
ID4	-1.23109	0.000245903	940	836	247	286
RBPMS2	-1.11771	0.000251716	1890	2318	626	736
EXOC8	-1.39239	0.000252752	499	609	174	123
HIST1H2BC	-2.22255	0.000259407	172	165	37	14
ELK3	-1.13129	0.000262858	3246	3418	1274	870
APBB2	-1.23228	0.00026423	6031	6743	2487	1346
FLI1	-1.67964	0.000264429	306	344	93	50
HEXB	-1.25405	0.000269123	1147	1177	419	268
CROT	-1.30864	0.000274337	587	566	175	153
SDK2	-1.04479	0.000275262	8505	10712	3034	3507
AMIGO1	-2.13751	0.000275171	136	221	38	19
GGT5	-1.44151	0.000277766	368	416	100	103
RGMA	-1.7627	0.000280131	203	261	43	53
AASS	-1.09981	0.000282057	1657	1842	617	532
ACP5	-2.27323	0.000282645	176	166	38	12
DUSP13	-3.39352	0.000284115	93	56	2	8
LGR5	-2.21089	0.000285785	181	175	14	40
CHST11	-2.11972	0.000287547	138	202	36	19
PRR5L	-1.20465	0.000288283	2040	2271	816	502
TMEM246	-1.32982	0.000292623	858	618	231	184
CERS2	-1.36619	0.000293003	465	472	136	120
HNRNPH2	-1.04463	0.000293486	4545	4642	1420	1713
KIAA0513	-1.07645	0.000294409	1786	1836	603	606
SHROOM3	-1.01318	0.00029731	4998	5099	1847	1676
TRAK1	-1.06432	0.000304048	3219	3163	1197	954
IFIH1	-2.18168	0.000304517	129	142	19	23
CASP7	-1.37265	0.000308337	555	651	131	196
GSN	-1.06698	0.000308548	13699	11491	3719	4753
ADRA1D	-6.23049	0.000316585	69	37	1	0
BCORL1	-1.09832	0.000326755	1551	1750	586	499
FAM20C	-1.55341	0.000333448	1844	1865	671	222
HPS6	-1.32521	0.000336262	2158	2621	907	437
KCNJ16	-2.6708	0.000339455	87	94	10	10
TTC8	-1.20053	0.000340403	817	867	283	233
SPATA18	-1.66331	0.000340676	227	282	62	51
MEDAG	-2.93644	0.000346469	109	87	3	15
PPP2R5E	-1.41296	0.000347723	3179	3211	1215	480
FOXP2	-1.68574	0.000350399	234	232	51	51
FMNL3	-1.14767	0.000351204	1624	1872	652	459
FAT2	-2.86372	0.000352525	88	77	10	6
FERMT2	-1.11409	0.00035934	6652	6412	2593	1665
ANXA10	-3.52083	0.000362931	32	116	6	3
RRAGD	-1.49674	0.000363894	414	520	149	84
TNFSF4	-2.22396	0.000364317	207	290	62	13
TPCN2	-1.15913	0.000365118	925	1062	335	291
TMEM130	-1.50905	0.000367225	299	328	79	76
NR1D1	-1.70916	0.000367787	235	215	50	47
PURG	-2.13873	0.000370248	118	183	29	19
CCBE1	-1.25813	0.00037015	817	746	195	265
GRIK5	-1.91483	0.000373143	247	170	29	49
PERP	-1.11273	0.000380463	6424	6548	2589	1641
NUAK2	-1.29757	0.000382441	2837	3133	1160	553
EGFR	-1.20928	0.000397196	2883	3128	1180	653
EREG	-3.05292	0.000399121	96	69	3	11
PPP2R1B	-1.12847	0.000406628	2463	2205	894	613
MCTP1	-1.26886	0.000406918	536	608	175	159
ST6GAL1	-1.59678	0.000407834	719	811	264	93
NFATC1	-1.23885	0.000411647	748	916	211	284
SLC25A29	-1.15726	0.00041198	855	881	281	267
SNX11	-1.14529	0.00041477	2880	2476	1033	677
CMPK1	-1.15841	0.000418385	2231	2154	850	536
DTX4	-1.12351	0.000420107	1964	2269	809	559
DAB2	-1.06744	0.000419734	7191	6635	2745	1910
RASSF3	-1.53101	0.000420436	1723	2049	692	229
NOX5	-3.18166	0.000426019	40	116	6	6
BEND3	-1.16173	0.000426287	815	957	288	269
FOXL1	-2.33466	0.000430608	269	280	68	9
TTC29	-1.33198	0.00043679	452	449	125	127
AJAP1	-4.13969	0.000438813	49	51	3	1
LOXL4	-1.63496	0.000439434	279	325	88	49
WNK4	-1.585	0.000440542	606	652	215	81
B3GNT2	-1.47989	0.000441005	323	323	76	87
SNPH	-1.69137	0.000443738	606	698	218	67
SCOC	-1.02063	0.000444233	3960	3778	1228	1457
HHAT	-1.13905	0.000445786	944	1027	339	291
HCAR2	-2.71852	0.000446377	76	112	6	14
CRB1	-2.9426	0.000448238	53	112	6	9
CMTM6	-1.01708	0.000453189	2399	2450	864	823
PPP1R3C	-6.09339	0.000454721	46	51	1	0
TDRKH	-1.33875	0.000460114	411	536	132	131
MAP3K3	-1.0185	0.000461805	4332	4786	1771	1398
MANBA	-1.26785	0.000465409	572	684	208	159
PRKAR2B	-1.37264	0.000468299	657	534	201	124
SOCS2	-1.13957	0.000468471	1384	1812	586	434
FOXF1	-1.98935	0.000471075	191	220	53	20
NEMP1	-1.18557	0.000472926	778	902	234	285
ACCS	-1.48038	0.000489311	310	308	81	75
ZNF217	-1.06262	0.000496872	1408	1615	525	493
TACC1	-1.0711	0.000501754	5869	6392	2474	1638
SPSB4	-1.35666	0.000502028	1181	1141	207	430
HERC5	-1.7604	0.000509575	212	279	67	35
ATAD3C	-1.45966	0.000509915	858	1173	367	153
ADGRD1	-2.79432	0.000512621	99	119	3	19
PLEKHG6	-1.92396	0.000516921	200	266	24	62
CAMK2D	-1.00279	0.000518582	8960	10572	3859	3000
TMCO4	-1.3017	0.000521517	458	606	142	161
TFPI	-1.22767	0.000526871	584	664	203	172
TRIM62	-1.47558	0.000526799	302	354	94	72
DDC	-4.10454	0.000527493	46	52	1	3
ADTRP	-2.89837	0.00053118	78	70	8	6
S100P	-2.35326	0.000536538	138	86	16	15
HSD3B7	-1.30197	0.00054476	1873	1885	734	342
ENPP6	-3.3252	0.000553094	45	84	3	6
MAP3K5	-1.37235	0.000567618	381	443	127	97
CMBL	-1.66169	0.000571428	1328	1334	474	121
USP53	-1.04033	0.000573397	1730	2039	688	601
PHYHIPL	-4.06185	0.000578038	44	51	2	2
CCDC169	-4.39876	0.000580933	44	46	1	2
PLCD1	-1.01588	0.000583181	3703	3889	1500	1145
EMILIN2	-1.48288	0.000585128	3505	3558	1358	428
PTPN3	-1.25581	0.000589415	537	589	186	146
KIF17	-1.36507	0.000591385	401	496	143	102
TRAFD1	-1.31256	0.000599297	410	545	133	137
TRAF1	-1.58241	0.000600013	259	238	63	54
SLC2A14	-1.14873	0.000606138	1092	1081	405	286
DMD	-1.10827	0.000608277	947	977	300	328
MITF	-1.24432	0.000620912	655	676	164	231
SRGAP2	-1.06132	0.000624862	4478	5237	1963	1315
LAMB3	-2.10098	0.000636676	173	204	48	14
C21orf91	-1.51197	0.000637122	273	335	88	62
ZBTB18	-1.58762	0.000638903	231	243	56	55
CCNG1	-1.60739	0.000640462	734	723	257	81
RHCE	-2.06309	0.000645905	151	157	36	16
CDHR3	-2.63222	0.000663702	88	79	11	8
GIPC3	-2.92106	0.000666346	64	76	7	6
NUDT4	-1.15987	0.000668671	5498	6159	2400	1278
FAM214B	-1.31028	0.000675586	2358	2680	1003	430
WNT9A	-1.58954	0.000679803	462	320	124	60
GLIPR1L1	-4.45449	0.000686852	39	55	0	3
EIF4E3	-1.38771	0.000688871	343	363	104	86
CNEP1R1	-1.40735	0.000692382	2487	2854	1047	374
STARD4	-1.24635	0.000696189	1530	1433	582	300
FAM155B	-2.09569	0.00070546	155	166	39	14
DOCK2	-2.60911	0.000726685	98	102	5	18
WDR47	-1.21658	0.000736495	774	785	287	186
ADCY6	-1.00812	0.000742912	2141	2645	890	783
SPNS2	-1.47171	0.000761785	1617	1903	224	665
NCK1	-1.15339	0.000763606	786	866	299	224
SELENOI	-1.25918	0.000768879	1852	1985	769	362
TMED7	-1.04502	0.000774678	6152	5862	2487	1621
CHST15	-1.19542	0.000776303	1170	1316	485	280
OLFM1	-1.68662	0.000788513	227	179	45	44
MYCL	-2.01626	0.00079206	105	219	25	31
GBE1	-1.17407	0.000798787	713	676	243	191
NTNG1	-1.51081	0.000806406	320	254	62	80
PLA2G15	-1.61166	0.000821333	224	227	60	44
NOTCH3	-1.22	0.000823734	10225	11018	4439	1996
GOLPH3	-1.00868	0.000828356	1676	1608	599	551
KCNH8	-2.45203	0.000847462	81	98	12	11
PNPO	-1.2761	0.00085161	792	944	329	176
TM4SF1	-1.22782	0.000859669	4540	4194	1807	828
NSUN7	-1.35792	0.000860725	325	371	98	93
UBALD2	-1.3664	0.000864379	458	571	180	101
CD55	-1.70325	0.000877365	398	343	121	40
POC1B	-1.37797	0.000880965	416	340	89	116
PCSK2	-4.0199	0.000898308	55	37	1	3
ARRDC2	-1.62318	0.000901565	315	300	98	43
JAK3	-1.25967	0.000905607	2331	2715	1028	458
C16orf45	-1.34179	0.000908119	329	392	102	98
SH2B3	-1.40952	0.000910334	595	617	222	100
SLC48A1	-1.13211	0.000918802	5918	7203	2745	1472
RGMB	-1.55158	0.000923802	297	314	97	50
GDAP2	-1.16258	0.000942615	752	676	254	196
PROB1	-2.08061	0.000947233	101	146	22	19
GPC3	-1.07709	0.000960454	9374	9087	2288	3863
MDGA1	-1.70439	0.000972348	193	186	48	34
MED12L	-1.20785	0.000972435	896	932	208	348
TADA1	-1.02313	0.000974789	1546	1359	528	480
ARID3B	-1.01953	0.000977863	10396	11663	4668	2998
IGIP	-1.65586	0.000993656	195	213	38	53
TCAF2	-1.48285	0.000998255	314	256	83	61
ZBTB14	-1.10635	0.00100258	955	1178	402	295
GPBP1L1	-1.02524	0.00100935	1390	1298	500	431
UBE2W	-1.14874	0.00100998	1652	1878	718	404
RBPMS	-1.25693	0.00103694	517	710	147	213
ZDHHC2	-1.36485	0.00104756	5076	6124	2289	779
BAALC	-1.85091	0.00105425	159	153	37	24
HTATIP2	-1.80891	0.00106361	166	182	45	25
LAMP1	-1.07313	0.00106699	4866	4519	1981	1168
SLC2A4	-1.50612	0.00106983	241	326	57	83
SCD5	-1.6259	0.00108797	566	667	220	62
CRYZ	-1.0111	0.0010916	1278	1257	460	426
DIO2	-3.89933	0.00110976	44963	44141	3874	358
MRGPRX1	-5.84257	0.00111477	29	53	0	1
CTNND1	-1.0287	0.00111667	9503	11072	2761	4318
CD44	-2.95262	0.00113015	11394	11900	1738	390
C1orf198	-1.0361	0.00113339	18225	18946	8025	4758
TENT2	-1.03629	0.00113513	1018	1009	352	344
DPY19L1	-1.01735	0.00113732	1610	1490	602	478
IL20RB	-1.52589	0.00114319	453	506	171	64
CTNS	-1.03493	0.00115091	1002	1041	365	337
DAB1	-2.42154	0.00115345	90	93	8	16
CYTH3	-1.01358	0.00115398	2259	2225	915	651
NIPAL4	-1.43392	0.00115455	677	716	263	101
HABP4	-1.02384	0.00117138	1330	1389	528	414
FMN2	-1.64842	0.0011758	417	435	147	45
SYNC	-2.29651	0.00117686	112	83	12	16
IGFBP7	-2.07928	0.00117673	124	164	35	13
ANKRD34A	-2.00056	0.00117869	131	130	29	17
TMEM267	-1.28629	0.00117998	527	686	222	128
RNF26	-1.26641	0.00117962	1735	1323	292	603
ETV7	-2.27837	0.00118322	87	113	18	11
FCHSD2	-1.29557	0.00118633	721	779	289	142
FOLR1	-3.47685	0.00118686	1081	1138	120	21
CACNA1A	-1.32454	0.00119871	454	589	108	184
DKK1	-1.10874	0.00120605	13047	12694	5567	2860
EPB41L4A	-1.13478	0.00121363	579	616	194	189
RARG	-1.00186	0.00121784	2440	3274	893	1109
OSTM1	-1.169	0.00123452	2506	2709	1097	539
RUSC2	-1.42923	0.00124966	2805	3330	1238	370
CUBN	-2.04499	0.00126075	155	96	21	22
LPAR6	-1.41818	0.00126136	364	405	71	131
DUSP5	-1.51207	0.00126411	457	349	139	61
PGAM5	-1.06451	0.00130414	1452	1960	674	473
CYP2C8	-2.96665	0.00131597	60	62	7	4
RAB21	-1.0437	0.00132573	3858	4116	1704	1023
RNF165	-1.14636	0.00134192	668	692	183	249
CDK15	-1.41384	0.00134875	315	339	108	65
TJP1	-1.4826	0.00136826	245	227	59	60
KLF4	-1.78433	0.00136944	185	181	51	24
KYNU	-2.17974	0.00137395	167	82	25	14
TRIM67	-2.6939	0.00138387	50	107	11	6
CCDC50	-1.12653	0.00138537	2823	2999	1241	640
SELPLG	-1.32384	0.00141484	573	717	245	118
NELL2	-4.29578	0.00142216	41	43	0	3
SGCA	-1.9056	0.00143659	233	185	61	18
SLC45A2	-6.61684	0.00143908	6	46	0	0
MARVELD2	-1.39087	0.00144427	307	262	77	76
CSF1R	-1.25772	0.00144579	379	538	122	147
RCSD1	-2.70415	0.00146028	57	92	5	11
SERPINE2	-1.19494	0.00147128	1742	1523	678	330
AUH	-1.15945	0.00149818	716	645	256	174
PNOC	-5.73571	0.0014996	31	45	0	1
ACBD3	-1.25516	0.00152093	3522	4408	1679	663
OLFML2A	-1.05529	0.00153708	2109	2913	680	1014
SLC9A5	-1.22879	0.00153795	421	500	119	157
RBM20	-1.06416	0.00154286	873	1195	320	374
SOD3	-1.98907	0.00154912	101	142	24	19
WDR63	-1.70015	0.00158205	198	147	41	34
PLSCR1	-1.52894	0.00161217	260	247	80	44
GAB2	-1.01537	0.00161592	1762	1900	523	750
PITPNC1	-1.40354	0.00164161	593	602	229	90
TM9SF2	-1.31345	0.00164283	685	799	292	129
SFXN3	-1.15283	0.00164358	12995	13857	5905	2618
PMEL	-1.17565	0.00165518	1147	1460	282	527
SLC27A2	-2.032	0.00166141	152	91	19	23
NKX1-2	-6.43357	0.00166073	27	18	0	0
RECK	-1.09175	0.00174474	1514	1513	636	366
EPB41L4B	-1.69206	0.0017553	140	233	47	34
CCNG2	-1.05233	0.00175484	840	816	254	308
FRRS1L	-2.44263	0.00175374	86	116	5	21
SEMA4A	-1.61086	0.00176597	155	268	45	52
SRGN	-3.97431	0.00176881	43	46	4	0
PRR16	-1.93286	0.00177378	143	111	28	19
HECW1	-1.93803	0.00178058	116	135	18	28
DNAJB5	-1.06085	0.00180769	2558	2527	1098	622
RIPK4	-1.63496	0.00181074	230	232	73	32
CORO6	-1.13987	0.00181433	936	935	380	219
BICRAL	-1.32065	0.0018344	299	311	94	78
PROSER2	-1.42281	0.00183804	256	235	61	68
ABCB4	-1.9699	0.00184629	118	110	20	21
PPP1R12B	-1.07725	0.00185725	755	723	218	275
RIC3	-1.51536	0.00190675	261	376	50	106
CPOX	-1.19528	0.00192722	588	459	186	137
GID4	-1.15842	0.00196557	556	457	152	168
TSPAN2	-1.03933	0.00198308	1583	1546	660	414
TGIF1	-1.21005	0.00200453	4096	4712	1923	763
BX255925.3	-1.02983	0.00200956	856	880	334	265
VSNL1	-1.92954	0.00208339	155	136	39	15
PADI1	-2.74414	0.00209052	44	109	12	4
MICALL2	-1.14919	0.00210003	742	838	318	184
LRP2BP	-1.2349	0.00210746	1187	1298	523	222
TP63	-3.06725	0.0021556	52	80	1	10
BNIPL	-1.52827	0.00216469	190	228	61	41
LRRC15	-1.93551	0.00225107	234	319	87	15
CDH2	-1.271	0.00226262	9371	9969	4253	1408
TDGF1	-2.27514	0.00226348	101	77	17	9
EPSTI1	-1.21314	0.00228034	493	367	140	122
ZNF30	-1.43842	0.00231742	287	227	81	53
CCSER2	-1.02595	0.00233275	2006	2271	929	551
PTPRM	-1.02686	0.00234417	1032	850	361	291
TMC5	-2.38168	0.00235148	86	77	7	15
CCDC117	-1.04914	0.00238043	1346	1353	574	346
FAM234B	-1.20409	0.00239883	2395	2722	1120	447
PRTFDC1	-1.18762	0.00241771	410	372	125	117
MYOZ2	-3.80884	0.00242343	435	335	35	4
STK32B	-2.09321	0.00243857	90	159	30	11
UNC13A	-1.51409	0.00247791	173	217	52	44
MAF	-1.07656	0.00247653	552	739	224	206
GCH1	-1.91815	0.00249344	140	160	42	14
ALS2CL	-1.3551	0.0025138	1190	1505	563	180
BEGAIN	-1.61045	0.0025115	194	178	55	31
NCEH1	-1.5378	0.00252245	225	211	69	37
PIK3IP1	-1.08678	0.00252426	2547	2437	1104	553
RNF6	-1.11427	0.0025539	1095	1161	480	255
CSF2RB	-4.6106	0.00255959	18	52	1	1
ZNF18	-1.17664	0.00256523	391	608	159	151
APOL6	-1.99928	0.00256512	101	109	22	15
GFM2	-1.04717	0.0025687	800	881	338	235
NT5E	-2.95273	0.00258537	1971	1734	279	60
CYP1B1	-1.28367	0.00260036	979	961	407	156
TNFRSF10D	-1.02508	0.00266484	4210	4237	1905	1024
KLHL3	-1.12989	0.00266726	416	474	142	144
SESN1	-1.39287	0.00267719	241	229	57	69
IAPP	-2.59037	0.00269527	93	52	5	12
PTPRN	-1.27863	0.0026984	965	794	365	148
SLC17A8	-2.77986	0.00272295	74	103	1	17
TMEM178B	-1.84737	0.00275534	120	115	23	23
CYP27C1	-1.09395	0.00275871	535	741	234	186
SELL	-2.50903	0.00278732	82	55	8	9
LRTM1	-3.74451	0.00279457	42	34	2	2
CORO2B	-1.56812	0.00283551	464	369	155	44
PAQR9	-4.59419	0.00284209	51	17	1	1
SCN2A	-1.24363	0.00284965	947	736	348	155
MEF2D	-1.1276	0.00287129	483	604	205	145
EMP1	-2.77121	0.00291038	4741	4743	811	172
EPPK1	-1.08039	0.0029131	3809	4794	1934	932
ZBED8	-1.26952	0.00294183	298	287	92	79
TEF	-1.13114	0.00299846	505	437	136	167
RUBCNL	-1.45532	0.00302555	203	241	70	44
C6orf223	-4.56305	0.0030901	32	35	2	0
SCN9A	-2.27836	0.00309789	124	102	28	5
HPCAL1	-1.29005	0.00325815	2594	2387	1099	342
ARAP1	-1.01018	0.0032775	791	856	334	242
SUSD2	-2.31421	0.00337798	80	68	12	9
TNS4	-2.37521	0.00338558	63	85	7	13
HHIPL1	-1.68079	0.00344085	176	252	70	24
IP6K3	-1.02419	0.00346066	1210	1250	536	317
AHNAK2	-1.33526	0.00349974	2634	3229	1286	354
KRT15	-2.78477	0.00352915	57	70	11	2
COL4A1	-1.27317	0.00353591	19458	18320	8566	2492
FAM102B	-1.24976	0.00362515	266	323	80	94
PLBD1	-1.39888	0.00366714	244	193	64	53
TRIL	-1.27264	0.00366728	277	304	71	98
C16orf89	-1.74145	0.0036859	102	165	29	27
SPATA12	-1.71499	0.0036866	150	115	31	26
PIGZ	-1.41903	0.00373879	175	240	57	52
ARHGEF6	-1.90648	0.00375469	231	203	70	12
JAG1	-1.17533	0.00375868	3217	2931	1401	524
MYO1H	-2.07097	0.00383604	89	84	14	15
LRRN2	-1.04384	0.00388466	633	744	194	275
TEP1	-1.00365	0.00391563	659	696	267	209
NTN4	-1.53533	0.00391873	246	259	90	33
SLC19A3	-1.82531	0.00393236	145	122	16	37
ABL2	-1.0131	0.00394285	3933	4300	1911	966
OTUD1	-1.34222	0.00396179	291	262	98	56
CCDC62	-1.9858	0.00401075	99	104	12	24
DISP3	-2.33545	0.00401503	54	90	10	10
MYEF2	-1.03449	0.00403104	621	679	188	258
ATP12A	-2.03018	0.00407241	90	90	13	18
GFRA1	-1.62915	0.004073	425	361	148	32
KCNF1	-2.99525	0.00407746	81	31	8	2
RAB30	-1.01893	0.00408959	1086	1074	472	280
RASSF9	-2.94554	0.00409494	39	60	3	6
OXGR1	-2.85586	0.00411584	52	51	3	7
F7	-3.45517	0.00412019	44	50	0	6
GAB1	-1.09455	0.00412895	471	407	154	136
COLGALT2	-1.23716	0.0041287	329	316	117	76
HRASLS5	-5.41408	0.00413286	20	41	0	1
SLCO3A1	-1.26267	0.00413875	360	482	164	83
ANO10	-1.08062	0.00414162	596	586	156	237
FOXN2	-1.15697	0.00420893	330	455	112	135
AMPH	-1.24425	0.0042606	367	382	145	78
GRASP	-1.14167	0.00427151	430	676	210	142
TM6SF2	-1.19617	0.00436814	431	575	202	107
GALR1	-3.49789	0.00437833	52	28	1	4
PKD1L1	-1.74094	0.00438929	150	110	34	21
MTUS2	-1.25021	0.00440214	495	577	97	219
VEGFC	-1.3837	0.0044102	274	217	84	49
TIGD1	-1.3839	0.00446518	185	212	55	52
FREM3	-5.38228	0.00447283	38	21	0	1
ATP2C2	-1.10272	0.00456652	493	627	226	141
PLPPR4	-2.88063	0.00461493	50	55	2	8
GCKR	-3.46551	0.00474352	63	31	0	6
HS3ST4	-1.82936	0.00483109	194	198	65	13
DGKI	-1.40232	0.00500553	297	245	100	45
BTK	-3.40467	0.00503713	45	30	2	3
C1orf112	-1.02971	0.00504461	734	548	200	243
ENPEP	-1.13637	0.00504517	458	333	121	133
DUSP1	-1.02907	0.00504996	4988	5068	2393	1086
LGALS9C	-4.38478	0.00507419	39	20	1	1
KLHL2	-1.23247	0.00509577	265	252	78	77
INSL4	-3.80367	0.00510039	58	21	0	4
EDN2	-1.73434	0.00514909	109	123	21	28
ADGRE5	-1.62155	0.00518161	138	187	24	50
LIPA	-1.23969	0.00519886	369	442	163	79
FPGT-TNNI3K	-3.23255	0.00524736	46	34	2	4
UPRT	-1.06025	0.00532043	618	480	215	157
ANTXR2	-1.29524	0.00538953	285	342	120	60
GPR27	-1.65657	0.00548331	130	170	46	21
LYPLAL1	-1.32699	0.00549697	225	195	57	61
AFAP1L1	-1.44006	0.00552479	437	567	206	55
NIPAL2	-1.65931	0.00554163	127	151	41	21
MPP4	-1.86526	0.00555834	147	152	47	11
SLC5A5	-2.46768	0.00556238	51	67	9	6
NRG1	-3.03904	0.00557812	1796	1638	253	43
IRF8	-3.07366	0.00558364	56	39	7	1
HLA-A	-1.15555	0.00559067	354	309	119	91
ATP1A2	-1.48195	0.00570899	162	180	33	53
TMCC2	-1.16871	0.00571326	401	343	91	142
L1CAM	-1.11227	0.005759	1082	626	347	213
HTR1D	-1.98782	0.00586286	128	113	35	8
SLC22A15	-1.60936	0.00587251	136	176	49	23
IRF6	-1.07949	0.00602176	375	384	139	114
MAST3	-1.00508	0.0060547	1708	2525	964	519
OTP	-5.42498	0.00613932	6	56	0	1
CYP27A1	-1.14042	0.00620257	315	334	90	117
SSUH2	-1.7484	0.00623591	88	137	26	21
BFSP1	-1.17305	0.00623368	482	473	202	97
IL5RA	-2.52659	0.00625552	49	83	3	13
PRRX2	-1.20036	0.00630998	824	994	410	148
KCNJ13	-2.51315	0.00633626	115	55	2	19
ST3GAL6	-1.00215	0.00638672	576	670	261	177
ADAM23	-1.18322	0.00639578	450	441	187	90
MYO5C	-1.07897	0.00650562	344	425	141	115
ELFN2	-2.81673	0.00652009	48	42	4	5
GRIP2	-1.49423	0.00655971	121	225	42	44
CGREF1	-2.17568	0.00663133	62	157	28	6
C1orf61	-4.35259	0.00667406	35	23	0	2
SLC18B1	-1.23196	0.00667133	296	251	66	98
LZTS1	-1.00836	0.00670943	1628	1934	840	408
CAVIN2	-1.80329	0.0067339	217	202	73	12
FAP	-2.81287	0.00674329	780	961	147	28
GAD1	-1.28406	0.00674972	310	318	125	57
CKMT1A	-1.93777	0.00686151	78	91	14	17
COMP	-1.36857	0.00687485	551	723	275	73
SLC1A2	-1.72047	0.00706616	119	96	21	25
TGM1	-1.09113	0.0070981	530	357	133	161
CLEC18C	-2.23706	0.0071433	111	102	29	3
S100A14	-1.15196	0.00714509	320	328	82	123
CCDC9B	-2.51739	0.00715135	2038	2338	438	102
POU5F1B	-1.5004	0.00734071	148	228	30	63
LACC1	-1.04637	0.00734814	1385	1659	720	319
DOCK8	-1.68279	0.0073666	116	131	18	36
HTR7	-2.07125	0.00741968	83	156	34	6
ZFP2	-1.66126	0.00744601	130	145	18	43
SYT16	-2.06424	0.00746914	63	86	11	14
LGI1	-1.27797	0.00762159	457	427	69	187
TRPC1	-1.05124	0.00763628	339	395	121	128
ECHDC2	-1.57084	0.00769007	121	232	27	56
MTM1	-1.28285	0.00785503	213	215	74	50
CRMP1	-1.00632	0.00786659	589	449	202	163
SLC9A7	-1.0005	0.00789952	598	628	267	165
ADHFE1	-1.33275	0.00791033	192	301	49	88
CASP10	-1.26238	0.00801116	184	243	61	64
CDYL2	-2.18375	0.0080966	68	61	9	11
USP43	-1.16072	0.00814702	269	346	78	115
TBC1D12	-1.02642	0.00825602	490	498	209	133
NAV3	-1.02008	0.00830598	1825	2027	934	406
KCNMB1	-1.099	0.00830719	792	952	404	170
COL22A1	-1.08922	0.00835847	840	924	411	174
BTN3A3	-1.66088	0.0083738	117	103	21	28
PIK3CB	-1.02136	0.00839174	389	421	157	124
TAGLN	-1.04201	0.008399	332	412	133	121
PIK3CD	-1.14954	0.00843659	2846	3176	1465	452
GSG1	-3.07181	0.00844182	50	33	6	1
RHOJ	-1.21803	0.00845179	577	696	287	99
TBX19	-1.03849	0.00857076	409	466	180	120
ACSS3	-1.03251	0.0086187	508	413	187	131
DPY19L2	-1.22767	0.00862559	232	213	75	59
RUBCN	-1.02235	0.00864249	2152	2640	1168	495
NGEF	-1.72022	0.00868292	159	78	29	22
LRRC66	-3.26517	0.00880388	40	28	3	2
FAXC	-1.01044	0.00883478	370	400	139	130
RENBP	-1.65551	0.00895795	134	103	19	34
MFNG	-2.80923	0.00905718	49	51	1	9
GEM	-1.54081	0.00906963	237	207	85	23
E2F7	-1.15224	0.00908669	309	331	129	74
PRKCD	-1.15691	0.00910215	461	349	170	87
KLLN	-1.13757	0.00910923	508	530	232	101
ZBBX	-1.75243	0.0092284	90	111	27	15
FRG1	-4.22504	0.00927181	1	80	2	1
VIPR1	-2.19201	0.0093146	53	77	13	7
KCTD1	-1.03791	0.00937657	610	615	277	144
CALHM2	-1.14777	0.00939614	258	242	81	78
CHIC2	-1.26677	0.00950868	265	298	114	51
ZNF630	-1.27062	0.00952832	174	207	54	57
EXOC3L2	-1.23417	0.00957019	288	292	118	56
RNF152	-1.4018	0.00967293	166	175	59	32
RHAG	-3.19136	0.00981132	62	15	3	3
CERS1	-1.12672	0.00982137	241	353	104	87
CLIC6	-3.58117	0.00982419	42	26	0	4
HACE1	-1.00033	0.0102582	508	438	137	196
BCL10	-1.03038	0.0102901	4513	5691	2559	963
CCKAR	-5.05262	0.0103799	26	21	1	0
NHLH2	-5.08863	0.010442	35	13	0	1
GABRB3	-2.75699	0.0104982	2805	2324	456	82
ZC3H12A	-1.02748	0.0105117	1188	1411	632	267
SIGLEC6	-2.59841	0.0105528	63	31	6	5
GREM1	-3.91052	0.0106352	251	172	19	1
FAM122B	-1.03008	0.0106747	460	544	127	218
PHOX2A	-2.93632	0.0107784	36	74	0	10
SCGB3A2	-1.19619	0.0108008	1568	1430	728	198
PTGS1	-3.2621	0.0108222	784	932	13	112
CD4	-1.053	0.010844	286	385	106	121
SLC35D2	-1.13927	0.0108643	217	288	79	82
ANOS1	-1.35371	0.0109238	606	483	244	58
SH3RF3	-1.13087	0.0110621	752	600	315	122
ARHGAP23	-1.51672	0.0110628	156	111	41	25
CYP2E1	-2.37612	0.0111698	60	43	6	8
PHOSPHO1	-3.68613	0.0111909	25	30	1	2
ZNF385B	-2.30565	0.0111984	38	75	8	8
HHIPL2	-1.45456	0.0113019	256	156	30	76
NELFE	-1.82817	0.0113346	89	77	20	13
PCDHGC4	-2.16823	0.0114366	93	40	12	9
CACNA2D3	-1.44699	0.0115783	445	449	195	37
SHD	-1.0288	0.0116912	326	365	103	135
TBX18	-1.32179	0.0117292	164	173	57	38
ST6GALNAC2	-2.52788	0.0117983	49	41	5	6
PTGS2	-2.39656	0.0118185	71	93	21	1
BORCS6	-1.09161	0.0119157	342	439	168	90
DAG1	-1.07459	0.012059	683	685	136	320
BTG4	-3.66197	0.0120791	27	27	1	2
GPR83	-2.56354	0.0121079	32	61	4	7
GATAD2B	-1.34236	0.0122135	133	181	47	40
ENKUR	-2.79863	0.0122219	63	25	7	2
RAPSN	-2.01293	0.012356	79	58	15	9
CDHR1	-4.09968	0.0124584	16	33	1	1
OLR1	-1.57305	0.0124731	193	254	88	18
CYP19A1	-2.31135	0.0126701	74	53	3	15
SOX2	-1.52455	0.0129149	151	97	36	25
MPP7	-1.15293	0.013119	289	199	75	80
S100A3	-1.10464	0.0132296	1695	1604	829	256
TIGAR	-1.16067	0.0132734	316	311	135	63
ALPP	-4.95128	0.0133433	19	25	1	0
SLC1A6	-1.39456	0.0133511	191	200	77	28
ANO2	-1.59108	0.0135165	91	137	19	34
FAM174B	-1.91969	0.013686	81	64	10	17
DDX60	-1.5346	0.0136917	124	114	38	20
NFE2L3	-1.42588	0.0137043	167	164	62	25
HIST1H2BJ	-2.55421	0.0138789	33	59	8	3
OVOL1	-1.95982	0.0139354	82	73	7	21
LOX	-1.08163	0.013966	7104	6480	3517	1025
RNF175	-2.11995	0.014012	55	69	6	14
CD163L1	-2.52342	0.014181	46	44	3	8
HLA-F	-4.11094	0.0141827	22	27	2	0
RP2	-1.05041	0.014209	419	340	164	95
MUC1	-1.08319	0.0142788	293	363	139	79
OR7D2	-1.61496	0.0143893	98	98	18	27
B4GALNT3	-1.16827	0.0144662	300	282	59	123
RET	-2.88384	0.0145512	21	53	3	4
C9orf135	-2.43335	0.0146101	43	49	8	4
TMEM65	-1.01459	0.0147086	333	358	145	96
DUSP6	-1.08194	0.014734	2468	2912	1381	413
TOX3	-1.25634	0.0149411	249	199	43	89
NKX2-3	-1.98648	0.0149797	38	121	15	13
FASTKD5	-1.29246	0.0150505	134	180	43	47
AMPD3	-1.44896	0.015136	119	176	52	24
MAOA	-1.4281	0.0151862	226	215	25	90
PAK3	-1.10352	0.015232	262	213	83	73
CCIN	-1.98425	0.0153556	94	51	18	8
FZD5	-1.90299	0.0154981	85	79	24	7
DIABLO	-1.2177	0.0155834	167	240	75	48
COL25A1	-1.40934	0.0156163	158	200	70	25
DRAM1	-1.19368	0.0157036	361	473	192	65
GRID2	-2.67497	0.0157112	48	43	1	9
LSMEM1	-1.16514	0.0158078	223	319	112	58
MCF2	-3.34033	0.0158358	16	42	2	2
CKMT1B	-2.29692	0.0159467	102	37	3	17
RORB	-3.58496	0.0160512	31	20	1	2
GBA	-1.75819	0.0162165	162	52	26	19
NTM	-2.25157	0.016434	5360	6149	1412	296
MAGED4B	-1.21091	0.0165029	225	720	165	120
ATP1B2	-2.2193	0.016564	50	63	4	13
SULT1C4	-1.03792	0.0166431	378	507	103	199
PLCXD2	-1.10585	0.0167215	222	227	84	63
ITGBL1	-2.44593	0.0168786	56	44	11	2
DEPDC7	-1.11403	0.0169595	235	272	104	61
MBOAT1	-1.33892	0.0169663	144	125	40	35
FOXA3	-1.88563	0.0170594	84	57	17	10
ARHGEF37	-2.09561	0.0171808	45	96	5	18
TENM1	-1.87032	0.0172513	87	68	22	8
TMEM132D	-2.08268	0.0172566	103	70	26	3
FRMPD4	-1.41672	0.0172782	311	304	136	27
DUSP7	-1.07419	0.017289	2195	2592	1246	359
ADCY4	-1.77015	0.0173182	81	119	9	32
SYN2	-1.16449	0.0173199	221	379	125	63
WNT16	-3.29446	0.0173535	24	32	1	3
PNPLA3	-1.03871	0.0175467	260	318	118	80
FRMD5	-1.02958	0.0177282	494	442	221	103
SCG5	-3.28477	0.0178992	93	2	5	2
KIF12	-2.05736	0.0179285	64	48	10	9
PCYT1B	-1.03768	0.0180728	866	987	470	167
SPHK1	-1.1152	0.0182261	386	362	174	70
CCNA1	-2.47781	0.0182499	36	59	10	2
ZNF568	-1.36178	0.0183145	143	112	34	36
ABTB2	-1.15098	0.0183605	1002	931	489	127
AOC3	-1.94118	0.0185974	80	83	25	5
CALHM3	-4.18156	0.0186847	46	5	0	2
CXCR6	-3.9626	0.0186981	30	14	1	1
TLX1	-2.74506	0.0189729	18	59	3	5
C2orf72	-1.34773	0.0191062	168	158	27	63
ACER2	-1.56961	0.0191787	96	85	23	20
OPCML	-2.1005	0.0192244	91	60	22	3
NPAS1	-1.0272	0.0193417	271	235	85	90
CTGF	-2.31163	0.0194333	32248	35724	8176	1506
NAT1	-1.70472	0.0198954	74	79	14	19
FEZF1	-1.58515	0.0199285	90	93	27	16
EXTL1	-1.45008	0.0199911	88	130	29	27
ART3	-3.24657	0.0200472	28	26	1	3
MS4A6A	-3.97999	0.0201887	22	23	0	2
SUSD5	-1.12668	0.0202587	272	263	118	55
TCF15	-1.73055	0.0204071	137	154	55	7
HS3ST5	-1.13815	0.0204783	170	206	54	66
MYLK4	-2.00315	0.0210415	56	64	6	15
CTSZ	-1.04547	0.0210656	2420	2292	1258	357
P2RY13	-2.25402	0.021358	50	52	3	12
FBXL16	-1.57213	0.0214255	93	84	25	17
JSRP1	-3.98238	0.0214978	15	30	2	0
SYT12	-2.19567	0.0215164	56	55	3	14
SNURF	-2.28661	0.0218387	42	48	9	4
DNER	-2.02302	0.0218891	43	67	11	8
SGCD	-1.48276	0.0219853	104	110	36	18
LYZL4	-3.94692	0.0221101	21	23	0	2
RAPGEF5	-1.33789	0.0221308	117	120	33	33
B3GALNT1	-1.1551	0.0221867	154	185	53	54
FGFBP2	-3.89592	0.0224755	29	13	1	1
ADRB2	-2.14247	0.0227485	50	69	16	3
MX1	-1.70952	0.0228113	86	90	29	9
JUNB	-1.00763	0.0230173	752	936	436	156
MMP24OS	-1.02489	0.0230574	211	249	84	75
VWA3B	-2.09458	0.0230672	62	66	3	18
SEC22A	-1.03326	0.0230806	210	235	81	72
HERC6	-1.52299	0.023084	126	128	14	48
GLDN	-1.6728	0.0232912	73	100	11	27
RCAN2	-1.59515	0.0237504	142	75	37	14
HK2	-1.06191	0.0241347	987	1196	575	163
LHCGR	-3.94809	0.0242249	13	31	2	0
PLXDC1	-1.38164	0.0244715	153	121	22	52
SPATA21	-1.28393	0.02459	122	127	38	34
SLX1B	-1.96631	0.0247556	50	61	13	7
HIST2H2BE	-1.11619	0.0247629	312	389	168	60
KCNK2	-3.91887	0.0249163	16	27	2	0
FAM43A	-2.16744	0.0251586	1146	1392	327	72
PLCXD3	-1.70294	0.0253376	57	110	25	11
SLCO5A1	-2.31473	0.0256093	36	63	12	2
ADAM20	-2.95139	0.0257627	24	31	3	2
NPIPA8	-1.22883	0.0258689	198	207	89	33
SNX16	-1.03443	0.0265521	214	208	65	80
HSPA12A	-1.21405	0.026595	203	191	86	34
PADI3	-1.89738	0.0266021	56	55	12	9
HFE	-1.36369	0.0267224	127	217	71	23
AR	-1.19522	0.0267635	449	428	219	52
PROCR	-1.03523	0.0268219	1082	986	553	161
ZC3H6	-1.12486	0.0269151	186	151	54	55
TTC9B	-1.1169	0.027017	325	357	166	56
FOXD1	-1.92848	0.0270248	54	54	12	8
EBF3	-1.07147	0.0270626	173	213	58	71
GABRA5	-1.41038	0.0272286	104	92	28	24
GNA14	-2.18238	0.0275197	44	72	16	2
ZIC1	-1.9825	0.0276098	53	48	8	10
MX2	-2.65099	0.0278017	37	53	0	10
SUCNR1	-2.79352	0.0278891	607	527	104	12
PLAC8	-2.17659	0.0279284	26	71	9	6
PRR26	-1.12569	0.0286898	222	235	45	102
CALHM4	-3.12937	0.0291547	20	30	1	3
CMTM8	-1.38106	0.0291654	112	102	37	21
CACNA2D2	-1.24688	0.0294797	115	173	32	53
DDIT4L	-2.55847	0.0295681	37	38	8	1
TMEM170B	-1.10252	0.0296406	161	200	48	70
SLC18A1	-2.21385	0.0298188	30	97	2	17
ZFP36	-1.10563	0.0299327	207	153	51	67
PAX6	-1.6577	0.0301451	90	75	28	9
EBI3	-2.35761	0.030548	563	633	141	24
ZNF320	-1.14974	0.0305411	197	133	46	59
FAM83H	-1.37842	0.030992	94	102	23	30
PARP12	-1.95703	0.0310353	55	44	10	8
PSD2	-2.06474	0.0316446	49	40	7	8
PTPRB	-1.30004	0.0316912	186	162	77	23
PRRG3	-1.82625	0.0326897	76	55	6	20
TUSC1	-2.09363	0.0327309	42	61	14	3
HIST1H4H	-1.2779	0.0333958	138	109	46	26
GRIA1	-1.0302	0.0335269	219	184	58	81
C14orf28	-1.26313	0.0336232	136	112	46	27
NPAS2	-1.37735	0.0339632	120	82	33	22
SPTBN4	-1.26789	0.0341163	119	103	33	32
CCDC81	-1.02247	0.0342006	413	380	203	73
CALHM5	-3.15727	0.0342043	442	375	61	4
SLC2A9	-1.92439	0.0343957	73	34	12	8
CCR7	-3.0555	0.0345063	30	17	2	2
ZYG11A	-1.54314	0.0345681	54	117	17	24
SPAG6	-3.34849	0.0346009	31	12	2	1
OPN3	-1.24701	0.0346203	123	120	28	44
CD274	-2.78415	0.0346359	345	286	59	6
ARHGEF28	-1.24546	0.0346449	162	96	41	36
MICA	-1.78057	0.0346676	60	52	13	10
PTPN22	-2.71844	0.0347581	33	23	2	4
RASD2	-1.48397	0.0349812	77	150	43	14
ULBP1	-1.47933	0.0352293	164	167	73	11
HTR4	-2.39753	0.0357578	33	50	1	10
HTR2A	-1.98798	0.0360017	65	42	4	15
SLC15A1	-1.38164	0.0360317	102	121	17	43
ADCY5	-1.07948	0.0371987	215	166	46	81
CPLX2	-3.56773	0.0374208	46	4	0	3
SLC1A7	-2.6606	0.0374089	21	42	6	1
MNAT1	-1.1857	0.0374327	174	151	71	30
GPR137B	-1.9411	0.0379231	41	52	7	10
NAP1L2	-1.02498	0.0379891	206	189	85	52
CLN8	-1.65428	0.0380519	44	91	14	16
ST8SIA5	-1.84518	0.0381581	56	46	8	12
SLC46A3	-1.28179	0.0382962	166	105	55	24
STIMATE	-1.70858	0.038819	47	74	16	10
AOX1	-1.73661	0.0390714	46	73	9	16
ZP1	-1.64843	0.039506	72	70	24	8
MARS2	-1.22229	0.0397146	111	118	29	40
NRCAM	-1.56139	0.0399751	85	61	23	12
WNT7A	-2.55046	0.0401707	37	21	3	4
ACRBP	-1.78888	0.0402971	54	49	10	11
SPARCL1	-1.86501	0.0402798	54	55	5	16
SERPINB7	-1.23873	0.040326	275	167	105	28
SYCP2	-1.86735	0.0404499	59	50	5	16
TMEM35A	-1.11655	0.0404937	146	171	67	36
ZNF280D	-3.41316	0.0407994	4	42	2	1
WNT4	-1.04244	0.0418131	267	297	52	140
MID2	-1.11152	0.0419686	199	177	87	36
ATP10A	-1.49395	0.0421246	68	80	23	14
C19orf18	-1.01546	0.0421591	145	221	63	64
STARD8	-1.93768	0.0424491	45	42	8	8
AGT	-1.75743	0.0425157	35	81	13	11
RAI2	-2.0249	0.0425487	40	41	6	8
ELOVL3	-1.92458	0.0427783	57	40	5	13
LANCL3	-2.2238	0.0428212	41	32	3	8
B3GAT1	-1.13479	0.042909	119	140	47	36
CLDN11	-1.74014	0.0431956	7107	8351	2612	656
SNORC	-1.33563	0.043205	84	103	20	32
CHRM5	-3.33504	0.0434339	16	27	3	0
PIFO	-1.09702	0.0434737	147	132	52	40
ZNRF2	-1.87894	0.0435713	58	52	4	17
NTRK1	-1.1395	0.0436043	130	130	34	49
FAM72A	-1.25729	0.0439892	96	101	29	29
TMEM150C	-1.1939	0.0442555	120	107	40	30
TUBB8	-1.2674	0.0443364	91	104	31	26
NFKBIE	-1.007	0.0443662	154	204	54	71
TMEM89	-2.49882	0.0444822	13	52	3	5
GPLD1	-1.10375	0.0447682	112	254	54	65
LDB3	-1.11739	0.0450675	118	138	44	39
PLEKHF2	-1.18423	0.0454534	148	122	57	27
CDH4	-1.53736	0.045601	66	74	23	11
ZFP42	-3.5501	0.0458543	2	49	0	3
CD70	-1.35849	0.0460796	123	120	53	14
RAB6C	-2.11418	0.0461941	29	45	7	5
OVCH2	-1.14164	0.0462754	122	116	39	37
PIK3R5	-2.51128	0.0463622	23	34	2	5
HIST1H4E	-1.27322	0.0465585	83	113	33	24
HIST1H2AG	-1.03536	0.0470754	202	140	69	49
TOX2	-2.94529	0.0478653	18	26	1	3
ABI3	-1.11828	0.0481192	202	132	74	35
GRM8	-2.21785	0.0483883	37	29	4	6
SFT2D1	-1.16213	0.0485115	109	123	43	30
MMP11	-2.60103	0.0488988	20	32	2	4
MYCBPAP	-1.19167	0.0490598	96	122	29	38
ANGPTL7	-1.61538	0.0492994	64	58	9	19
CNTN2	-1.43409	0.0493765	62	112	14	31

## Sheet: LHX8_P
Gene_symbol	log2(CTR/LHX8_P)	pvalue	LHX8_P_1	LHX8_P_2	CTR_1	CTR_2
PIH1D3	5.93989	0.0238529	0	0	15	1
GZMB	6.18638	0.0219684	0	0	19	0
PYCR3	6.33888	0.00574994	0	0	13	8
CLEC4M	6.65264	0.00211888	0	0	9	17
LIM2	5.53053	0.0448654	0	0	8	4
HOXA6	5.53226	0.0440644	0	0	7	5
PPP1R17	6.3379	0.00590413	0	0	14	7
GIMAP2	5.75784	0.0269694	0	0	6	8
HPCAL4	6.53742	0.0031536	0	0	8	16
CDKN1C	5.53226	0.0440644	0	0	7	5
RPL3L	5.94254	0.0193476	0	0	13	3
UGT3A1	5.86209	0.0232603	0	0	3	12
CCNO	5.86071	0.0223089	0	0	4	11
ALX3	6.41314	0.00492614	0	0	6	16
ABO	5.37137	0.00867478	0	1	10	19
HSD11B2	4.60169	0.0490288	0	1	6	11
GIMAP7	5.53397	0.0437156	0	0	6	6
AGTR2	5.85659	0.021253	0	0	7	8
TMPRSS11B	5.85108	0.0227739	0	0	11	4
AGBL4	6.71357	0.00369171	0	0	1	26
QRFPR	6.19423	0.00885873	0	0	12	7
CATSPER4	4.67538	0.0463099	1	0	3	15
PCDHA8	6.4028	0.00530774	0	0	17	5
HBD	5.76226	0.0289013	0	0	3	11
ZCCHC3	5.30123	0.0119009	1	0	23	5
RTL1	5.94385	0.0183714	0	0	12	4
SCX	4.95351	0.0251199	1	0	17	5
TMEM88	4.52115	7.1331e-57	426	395	6436	6843
MIS18A	6.35967	2.37946e-56	41	18	1576	1849
DCN	4.40558	1.45286e-55	3113	2911	40933	48957
FRZB	5.14944	3.62519e-55	394	393	7327	12303
COL15A1	4.7311	1.99836e-52	142	193	2949	3297
DDIT4	4.45554	1.55782e-51	534	455	8493	6820
WDR18	6.10838	4.53597e-51	108	44	4455	2989
TBCB	4.34533	1.77172e-40	1031	697	14579	10273
MRPL12	5.83382	1.14007e-36	36	14	1284	739
TNNI1	3.76282	4.98058e-35	409	316	3340	3603
GPBAR1	6.32311	2.19687e-34	16	13	1190	452
IL6ST	3.41568	6.92459e-34	961	1164	8232	7711
PIN1	4.06767	7.49727e-34	806	589	10248	6299
PITX1	5.04696	2.47015e-32	133	47	2399	1828
SLC25A4	3.26035	3.40225e-31	845	915	6273	5598
SPON2	4.51344	7.99468e-31	32	52	647	699
EGFL6	4.96402	1.39597e-30	233	218	7537	2419
SQLE	3.70999	1.00355e-29	456	357	4529	2990
JOSD2	4.21278	1.9788e-29	228	133	2934	1809
RHBDD3	3.84523	3.58518e-29	366	211	2959	2908
HOXB6	4.9251	7.38284e-29	25	17	435	465
KDR	3.1279	1.87935e-28	661	737	4282	4314
PROK1	4.55124	2.03592e-28	86	107	2240	950
INKA1	3.93781	2.1468e-28	137	85	1241	1164
PIGH	3.25637	5.91894e-28	419	434	3179	2563
SST	3.86696	9.68193e-28	1006	878	12999	6430
TGFB1I1	3.28373	1.26045e-27	746	717	5849	4199
RAB11B	3.15616	1.90343e-27	664	597	3726	4193
APOA1	5.66392	2.17141e-27	13	7	384	332
HSPBP1	3.58195	2.23863e-27	185	161	1685	1239
DLK1	3.08887	1.7133e-26	2047	1788	12881	10143
ATG4B	3.18532	6.67301e-25	918	641	5037	4981
PRSS35	3.08731	1.0062e-24	943	714	4779	5159
RAB24	4.60216	1.31061e-24	18	30	457	362
CALCB	4.35729	3.3025e-24	59	37	896	497
THBD	2.93921	3.48005e-24	609	563	3319	3017
HOXC8	3.81079	7.81216e-24	84	84	1037	626
PPP1R15A	2.95004	2.93288e-23	916	821	5354	4116
ZNF205	4.03601	4.72911e-23	48	38	575	421
ZNF688	3.81736	5.55418e-23	48	55	557	465
CCDC184	3.35442	6.52697e-23	257	254	2292	1395
TMEM161A	3.78664	9.98162e-23	247	115	1657	1881
MDK	2.68263	1.29791e-22	12452	11160	54848	52022
TMEM223	2.88253	2.31696e-22	665	589	3572	2951
EPHB2	3.31766	4.14274e-22	942	960	8784	4598
STAR	3.76725	4.78778e-22	60	110	936	688
EIF4EBP1	2.9814	5.80867e-22	3657	3405	24028	15334
ACADS	3.72249	8.86712e-22	148	74	1062	1013
TMEM176A	6.02149	1.11869e-21	10	2	247	304
WNT2	3.96728	1.36807e-21	59	86	1057	539
TIMM44	3.50694	1.83071e-21	95	96	923	608
RGS19	3.26495	5.11305e-21	207	144	1334	1051
SAFB	2.75599	6.65797e-21	690	604	3277	2888
CRISPLD2	2.57802	7.05504e-21	6025	7271	27784	28018
TMEM37	3.98325	7.00151e-21	49	62	428	803
C6orf226	3.49258	1.38358e-20	70	66	591	488
HNRNPM	2.87621	1.78625e-20	2584	2473	16011	10187
DNTTIP1	2.91276	2.24639e-20	360	391	2318	1666
CAMK2A	2.89272	2.27296e-20	222	256	1285	1212
YIF1B	4.05042	2.58679e-20	1105	345	9682	7415
RTL8A	3.07866	2.78565e-20	539	367	3125	2289
MED30	3.77713	4.33119e-20	46	68	671	428
PEX11G	3.55508	4.56788e-20	68	58	593	452
NT5C3A	2.62916	5.4922e-20	695	681	3129	2868
GDF7	3.12488	7.14575e-20	407	419	1864	3198
PCP4	3.39445	1.54653e-19	100	112	976	595
DNPH1	2.80458	1.84393e-19	884	762	4781	3338
TRIM55	2.66951	1.95083e-19	1490	1175	6440	5531
MOSPD3	2.77774	2.27572e-19	690	787	4208	2925
ASMTL	2.97002	3.6902e-19	214	291	1210	1566
UPK3B	6.55952	4.07216e-19	5	2	175	290
RAMP1	3.47393	5.02203e-19	118	102	1120	607
ACTB	2.51497	1.25827e-18	27442	22108	106668	93254
ALKBH4	2.58279	1.25444e-18	491	528	2241	2056
CYB5R3	2.81907	1.46736e-18	540	387	2525	2098
TNFRSF25	3.6101	1.47226e-18	287	225	3169	1257
WNT7B	3.40402	2.11522e-18	159	145	762	1500
SCCPDH	2.84246	2.48003e-18	219	193	1120	964
THOP1	3.66399	2.75789e-18	402	158	3048	1997
SLC39A2	2.75428	3.12712e-18	546	668	3420	2345
MAP2K2	3.49529	3.5454e-18	1069	521	8353	4382
RASSF7	4.81427	5.52685e-18	14	8	224	213
NAXE	2.41202	5.53864e-18	2530	2292	9479	8614
AMHR2	3.91652	9.76756e-18	78	40	433	825
THAP8	2.50662	1.14298e-17	561	548	2326	2114
RELN	3.63173	1.20758e-17	163	103	731	1593
CORO1B	2.77233	1.77291e-17	951	603	3947	3562
ACSM3	4.4186	2.20988e-17	53	57	336	1312
ST6GALNAC3	2.55412	2.40016e-17	613	515	2213	2457
BDKRB1	3.32409	2.6744e-17	157	198	1700	805
BST2	2.42359	2.69266e-17	1686	1727	5780	7100
PCNT	2.37024	6.05703e-17	936	957	3584	3308
GYPC	2.46218	6.50072e-17	1203	1275	5506	4114
DNAJC2	2.49757	8.07125e-17	410	442	1790	1597
ASF1B	2.43927	9.18774e-17	563	551	2061	2193
DLGAP1	3.53304	1.01535e-16	38	65	474	363
C1orf53	4.7067	1.12908e-16	8	15	246	176
OSR1	5.70619	2.1175e-16	8	5	115	362
VTN	2.45206	3.49889e-16	2377	2303	10702	7360
SOX6	2.57036	3.58566e-16	542	634	2042	2863
DTYMK	2.43075	4.22828e-16	626	737	2865	2306
HOXB7	2.91675	5.34627e-16	124	112	709	548
ATG101	2.57145	5.40114e-16	656	603	3155	2126
ADCK5	2.75438	9.38297e-16	189	148	779	825
REEP6	3.85611	9.88905e-16	21	28	273	226
CD200	3.74974	1.07528e-15	38	41	252	494
COL3A1	2.72935	1.19621e-15	5229	3906	27438	15423
RXRG	7.67552	1.2701e-15	1	2	192	239
ARHGAP20	4.14837	1.54915e-15	23	13	229	222
OIP5	3.16346	1.64102e-15	55	78	433	404
KCTD16	2.99981	1.68335e-15	104	80	491	547
SHKBP1	3.07769	1.9772e-15	259	140	980	1401
ATP7B	2.38124	2.4097e-15	478	459	1626	1811
RTN3	3.26411	2.44301e-15	67	47	377	396
AURKAIP1	2.39816	3.03503e-15	1594	1701	7290	4950
CNTN5	4.25091	4.75981e-15	15	62	349	671
MME	2.36493	4.83005e-15	585	681	2056	2526
TXLNA	2.48144	5.10957e-15	329	278	1245	1146
SLC39A6	2.58026	6.44337e-15	799	684	3888	2377
PDLIM7	2.14879	7.65844e-15	2436	2311	7596	7236
KCNK1	2.39869	9.56437e-15	317	385	1301	1301
SLC18A3	2.79096	1.53721e-14	348	423	1304	2438
DIO3	2.90561	2.07625e-14	76	106	500	458
MRPL37	2.19925	2.20106e-14	3721	3429	13067	10093
CAMLG	2.42716	3.15255e-14	451	343	1436	1577
GINS2	2.08058	5.03157e-14	2231	2168	6511	6593
RTN4R	3.47521	5.84709e-14	41	28	293	249
COL8A2	3.33985	5.88213e-14	76	118	421	953
NOLC1	2.48067	6.57922e-14	1046	883	4743	2864
NDUFAB1	2.37002	7.75444e-14	2160	2208	9890	6035
P2RY6	2.73889	7.78509e-14	102	114	554	461
EIF5A	2.67485	8.04947e-14	381	374	2219	1184
SURF2	2.36817	1.13552e-13	678	611	2801	1896
NDRG2	2.37353	1.29261e-13	271	283	1105	917
PTMA	2.47036	1.45811e-13	1079	676	3847	3036
SHISA3	5.93612	1.54409e-13	2	5	93	207
PPP4C	2.10566	1.82999e-13	3599	3160	11283	9240
ADAMTS9	2.30063	2.36117e-13	1699	1725	4672	7185
RER1	2.55108	2.44353e-13	440	454	2372	1324
PEBP1	2.16128	2.46545e-13	3424	2561	9610	9293
FBXO5	2.23051	2.71922e-13	393	383	1299	1266
HOXB1	5.09894	2.73712e-13	16	7	94	461
INTS1	2.74333	2.99141e-13	693	358	2959	2032
PLPBP	2.04934	3.00834e-13	1365	1395	4209	3836
BANP	2.24846	3.37963e-13	340	402	1249	1230
TNNT1	3.417	3.5777e-13	172	60	659	1097
AQP4	4.77144	3.85211e-13	3	15	197	147
GAS6	2.86387	4.14881e-13	392	198	1862	1185
PRIM1	2.3463	4.6398e-13	291	245	962	960
FUZ	2.81737	5.4955e-13	91	92	377	530
NRXN1	3.40563	5.87658e-13	62	28	313	362
BIK	4.66543	6.92746e-13	11	5	151	136
BID	2.11706	8.34209e-13	946	845	2994	2486
CD99	3.05119	8.45681e-13	885	848	7692	2466
RIMS1	3.42907	1.01453e-12	35	33	197	318
MATN2	2.13537	1.03553e-12	463	516	1541	1485
TNNT2	3.44896	1.15807e-12	29	28	195	243
ISM1	2.45888	1.70292e-12	171	152	587	664
FNDC5	2.39128	1.82617e-12	198	187	656	766
LMOD1	2.30893	1.81787e-12	242	277	998	812
C6orf141	4.12991	1.82145e-12	19	9	201	146
LUM	1.96145	2.03699e-12	9603	9646	23937	28808
C7orf50	2.19356	2.13058e-12	1670	1621	6455	4165
PKMYT1	3.33639	2.21039e-12	106	36	506	512
DDX54	2.21058	2.43501e-12	328	302	1051	1004
IL6R	2.55614	2.4463e-12	155	116	570	555
SPNS1	2.15762	2.43972e-12	932	694	2641	2482
UGT2B7	5.4399	2.58072e-12	4	4	90	154
MXD3	2.26454	2.95018e-12	398	389	1121	1539
ARPC5L	3.03264	3.00315e-12	119	57	583	438
ZNF512B	3.08556	3.05116e-12	50	63	257	416
CCND2	2.04163	3.36185e-12	744	707	2023	2184
RAD50	2.78605	3.54915e-12	93	67	389	390
PPAN	3.47258	3.80118e-12	26	25	221	178
RRP1	3.09045	4.63722e-12	159	60	697	627
MEIS2	1.98727	4.76095e-12	1229	1313	3269	3819
SLC9A3R1	1.98487	6.63593e-12	2685	2548	6449	8130
ADRM1	2.77265	7.15108e-12	867	362	3512	2454
CDCA2	2.13317	8.16581e-12	486	566	1425	1817
TSPO	2.07165	8.74361e-12	4356	4370	15573	10294
NUDT16	2.23237	8.71873e-12	815	874	3478	2117
CD320	2.19003	8.93027e-12	2047	2229	8606	5148
C19orf73	3.38924	9.02558e-12	27	34	276	174
IGFN1	3.95042	1.08392e-11	16	22	294	120
CFAP46	2.90535	1.24898e-11	110	63	551	367
ANXA8	2.36354	1.44931e-11	369	470	1143	1885
TMEM151A	3.07486	1.47514e-11	45	37	233	254
HOXB5	3.38875	1.61373e-11	25	56	375	220
SNRPA	2.02938	1.89607e-11	1845	1361	4827	4417
NKAIN3	2.92303	1.8993e-11	59	46	299	263
RHEB	3.62548	2.07665e-11	20	23	236	138
TMEM98	1.88122	2.20516e-11	7997	6886	18330	20313
DNAJB11	2.28846	2.27803e-11	959	868	4059	2245
ZFYVE21	2.01208	2.49409e-11	1243	1009	3529	2884
HOXD9	3.81038	2.49785e-11	45	37	659	156
GCNT1	2.15601	2.59025e-11	271	308	983	833
MFAP4	1.91085	2.85271e-11	1799	2327	5622	5279
B4GALNT4	3.18482	3.21354e-11	130	43	489	627
CFI	2.77229	3.22981e-11	79	57	339	317
CPED1	2.5146	3.42884e-11	93	105	408	388
GHR	2.51692	3.44265e-11	106	96	429	386
ITPR2	1.97554	3.44072e-11	692	891	2224	2150
NDUFS3	1.96875	3.62807e-11	2589	2657	8491	5983
NAT8L	3.66792	3.90314e-11	19	21	130	227
MAEA	1.98225	3.96196e-11	1092	860	2772	2671
ALG1	2.12032	5.22523e-11	538	450	1751	1282
NCOA4	2.64966	5.24093e-11	524	479	3199	1251
POLD3	1.96322	5.49892e-11	726	860	2393	1958
CRB2	3.62959	5.68703e-11	22	15	148	175
PPP2R5D	2.11061	5.86149e-11	561	409	1552	1407
BIN1	2.89213	5.88932e-11	250	91	831	965
SYNPO2	2.10393	6.09754e-11	1398	1620	3528	5579
UBA7	2.85654	6.52532e-11	63	129	385	587
CENPM	1.85022	6.87663e-11	1096	1167	2887	2855
EPS8	2.52422	7.32966e-11	230	211	1191	601
NPNT	2.27515	7.66239e-11	362	353	923	1510
RSPO3	2.60442	8.79136e-11	77	76	315	340
DNAAF2	2.24975	9.57255e-11	315	378	1434	887
MFSD10	1.86813	1.06893e-10	2520	2030	5879	5840
BIRC7	3.1755	1.22334e-10	53	28	214	303
SIPA1L1	1.80736	1.25858e-10	1583	1560	4033	3716
RNF208	4.00326	1.31385e-10	27	6	204	172
HIST2H2AC	7.50747	1.34663e-10	2	0	142	115
HIST1H4C	2.70291	1.46073e-10	533	928	1891	4752
HPRT1	2.39041	1.56354e-10	134	127	555	410
MFSD1	2.35647	1.69623e-10	234	209	1006	596
WDR34	1.83468	1.77364e-10	1857	1898	5260	4177
CYP51A1	2.99603	1.79639e-10	57	57	433	209
ARHGAP22	2.99585	1.79625e-10	33	53	218	263
YIF1A	1.79589	1.83129e-10	8238	8338	22725	17834
SYT10	3.61315	2.05698e-10	23	18	121	232
WBP11	2.06164	2.13088e-10	1355	1351	3033	4907
LRRC75B	2.2212	2.19757e-10	306	249	1088	740
PARM1	4.10258	2.42108e-10	7	13	115	126
CDC20	1.80197	2.45379e-10	4857	4337	10312	12270
DNAJC22	2.28411	2.66409e-10	300	206	740	999
PPA1	2.04977	2.66244e-10	590	460	1745	1326
UBE2C	2.14297	2.69273e-10	203	196	609	632
EIF2B1	1.81216	2.74711e-10	1701	1730	4695	3794
UBE2S	2.42715	2.82764e-10	704	452	2926	1480
HAGHL	2.95346	2.96596e-10	49	84	479	245
FAHD1	2.04249	3.05424e-10	2616	1690	7010	5541
LRRTM1	4.79041	3.26009e-10	2	9	105	108
ZNF326	1.89026	3.83517e-10	1796	1657	5273	3758
PCDH10	2.57891	4.81646e-10	150	134	807	392
RNF207	2.34977	5.14979e-10	281	535	1772	1145
DCUN1D5	2.1304	5.30153e-10	985	1142	4251	2312
LAMC3	1.98731	6.09827e-10	333	301	918	854
PLTP	1.67223	6.33584e-10	7111	7336	16378	16035
TK1	1.79144	6.59109e-10	810	875	2117	1988
HOXC10	6.4595	6.68651e-10	2	1	86	100
WFDC10B	4.19094	7.0298e-10	6	11	116	102
CNKSR3	1.89	7.45661e-10	548	703	1536	1720
PHB2	1.76232	7.84995e-10	3633	3550	9689	7489
FREM1	2.06212	7.88169e-10	247	243	656	784
TSHZ1	1.84165	8.51269e-10	614	619	1460	1650
FAM3A	1.83222	8.81685e-10	954	966	2721	2097
CLEC11A	2.33063	9.02453e-10	139	121	535	388
NSG1	1.74718	9.46303e-10	1340	1231	3053	3029
GRID1	2.98252	9.48974e-10	30	48	247	186
TPX2	1.82086	9.82874e-10	573	613	1513	1436
RSPO2	2.04689	1.08171e-09	1324	1389	5080	2827
PITX2	1.77826	1.16116e-09	1899	2340	5689	4538
HOXB3	2.0205	1.16409e-09	410	397	949	1354
B9D1	1.73593	1.31862e-09	1868	1762	4646	3878
C6orf106	2.04973	1.36476e-09	202	215	610	605
DKK2	2.21117	1.42196e-09	504	453	1081	2035
COBLL1	2.19243	1.51221e-09	174	233	549	756
GALK1	1.84743	1.82774e-09	1332	995	3170	2745
HM13	1.76699	1.83127e-09	2893	3064	8281	6004
DPP10	2.86766	1.92521e-09	42	63	345	194
CEP112	2.0475	1.96443e-09	398	274	1024	939
SMIM1	2.83671	2.16297e-09	37	42	200	197
ATP13A2	1.87427	2.56034e-09	1108	865	2917	2193
IFT81	1.77602	2.65555e-09	680	687	1776	1522
PKN1	2.38253	2.75425e-09	569	246	1386	1626
DRD2	2.48771	2.7576e-09	151	79	450	463
CCDC12	2.35999	2.89484e-09	90	108	315	399
WDR76	1.73538	3.00157e-09	1524	1620	4162	3212
ARSI	1.76243	3.05698e-09	2738	3107	8148	5816
PTPRH	3.1523	3.34466e-09	36	24	142	234
GATD3A	2.02449	3.40382e-09	263	231	796	622
ZNF469	2.06862	3.47978e-09	298	278	1033	672
TSPAN15	2.08344	3.63931e-09	623	729	2632	1406
PABPC4L	2.47843	3.92884e-09	86	64	299	291
GATA5	2.36538	4.06068e-09	212	262	554	1158
CNTRL	1.76622	4.34287e-09	633	592	1417	1518
CPLANE2	2.79328	4.43229e-09	50	44	283	177
BRAT1	1.80452	4.76634e-09	685	557	1503	1557
SMTNL2	2.35829	5.082e-09	166	211	459	896
FAM111B	2.08711	5.19928e-09	150	189	493	519
CARNS1	2.95493	5.38787e-09	114	64	256	717
GNB1L	2.01068	5.47014e-09	524	337	1329	1125
ATAD2	1.73837	5.55595e-09	699	708	1782	1525
PHLDB2	1.68527	6.23375e-09	2752	2958	5650	7259
BEND5	2.0792	6.79576e-09	297	200	688	795
RAMP2	2.24716	7.53117e-09	161	109	422	483
OSBP2	3.02149	7.83916e-09	31	26	144	182
GLI4	2.73248	8.00143e-09	62	53	353	187
DNAJC9	1.73496	8.17091e-09	718	642	1681	1511
POP7	1.75826	8.19847e-09	1679	1498	4430	3155
HS3ST1	2.35088	8.4971e-09	96	131	322	490
ZNF641	1.63654	8.51089e-09	1630	1556	3701	3280
PTGIS	1.88687	8.57597e-09	570	417	1402	1177
HBQ1	9.25923	8.73211e-09	0	0	100	59
PPCS	1.77933	8.73046e-09	1654	2282	5466	4030
FAM19A3	3.80917	8.80246e-09	15	10	169	79
BCO2	2.46523	9.46081e-09	63	77	240	303
CNTLN	1.71625	9.81499e-09	664	624	1455	1526
SPON1	1.76976	1.08927e-08	457	491	1228	1048
CNTFR	3.69905	1.11277e-08	15	9	102	118
KIF4A	1.7027	1.12419e-08	1157	1498	3319	2756
TXNRD1	2.53476	1.29975e-08	611	385	3057	1039
BRD3	1.69597	1.30256e-08	1008	869	2297	1993
DCTN2	1.68286	1.325e-08	1792	1419	3807	3470
COL21A1	2.39865	1.35785e-08	81	122	297	453
GRWD1	1.61406	1.36315e-08	1207	1223	2626	2611
VGLL4	1.94051	1.42557e-08	915	961	3274	1805
GFPT2	1.92775	1.46192e-08	293	264	851	644
CDCA4	1.78344	1.49153e-08	793	595	1618	1754
SLC25A48	3.20795	1.76054e-08	33	16	135	185
ROR1	1.80524	1.79575e-08	1090	1041	2081	3157
PICK1	2.76102	1.86009e-08	150	47	496	453
APBA3	2.12272	1.90054e-08	129	118	382	376
CHRNA3	3.5185	1.9526e-08	11	18	99	134
ZNF628	3.41002	1.95085e-08	53	15	364	151
NCL	1.75793	1.96497e-08	2588	2593	7579	4780
GNB2	2.06734	2.09138e-08	2502	1178	5250	5679
CXCR2	4.20868	2.10346e-08	5	11	147	61
NIPSNAP1	1.54961	2.11536e-08	3675	3657	7201	7907
PLD3	1.84673	2.14812e-08	21711	12514	42722	44378
NDNF	2.49548	2.1504e-08	154	180	370	950
SERPINE3	3.36201	2.2059e-08	43	20	117	340
REN	5.42236	2.28348e-08	12	57	1190	872
CCDC137	2.63107	2.31798e-08	81	63	426	205
HERPUD1	1.71525	2.40347e-08	4483	4757	13008	8378
CAPN1	2.02578	2.4516e-08	2245	1108	5223	4457
HOMER3	2.23588	2.54518e-08	148	97	448	368
MIS18BP1	1.69622	2.57584e-08	488	513	1148	1135
MRPL57	1.63925	2.62382e-08	2935	2371	6379	5290
WDR24	2.32478	2.82643e-08	188	93	501	496
DGCR6L	1.69204	2.84124e-08	2149	2299	6042	4086
SECISBP2	1.60318	2.84602e-08	1483	1646	3676	3016
TONSL	2.2052	2.93228e-08	218	133	475	668
RPP25	2.51962	2.93435e-08	75	75	398	209
E2F8	2.60592	3.08483e-08	54	41	201	207
PDK2	1.93655	3.0952e-08	317	241	853	656
TLE2	2.23254	3.10042e-08	87	129	327	385
CAAP1	1.8943	3.11972e-08	324	356	1067	714
KCNMA1	1.61001	3.22097e-08	989	962	2005	2188
THEM4	1.66823	3.30014e-08	1115	1215	3003	2213
MTFMT	2.00326	3.33745e-08	205	171	600	464
ACSM1	3.69737	3.33069e-08	10	18	75	179
NCCRP1	1.94803	3.4379e-08	212	241	525	703
HNRNPA1	1.52938	3.48261e-08	9263	8768	17081	19567
TBX4	6.06132	3.53659e-08	1	2	85	56
HS6ST2	2.07727	3.57304e-08	183	135	521	427
ARRDC1	1.90845	3.89934e-08	634	383	1338	1362
PTPN13	1.74255	3.93323e-08	443	383	998	951
PTPN1	1.914	4.00594e-08	477	491	1629	944
TMEM235	4.64717	4.03407e-08	8	2	55	122
HOXC4	3.59092	4.28273e-08	7	21	119	117
NCAPH	1.58856	4.54724e-08	1168	1082	2523	2247
KCNJ3	3.77586	4.97176e-08	14	21	62	273
MAD1L1	1.71131	5.00795e-08	429	435	1076	917
PDCD6	1.9597	5.41834e-08	275	318	1012	613
RNASEH2C	1.58587	5.42902e-08	903	956	2083	1846
EMC6	8.92317	5.83919e-08	0	0	82	44
NPR1	3.08018	6.07129e-08	36	26	111	258
C9orf116	2.22303	6.1091e-08	132	175	657	352
TENT5C	2.377	6.39835e-08	96	106	493	247
YTHDF2	1.68577	6.53333e-08	1091	868	1971	2472
CYHR1	1.55726	6.546e-08	1211	1127	2499	2350
CSNK1G2	2.16386	6.88125e-08	303	156	835	623
HOXC9	3.54439	6.9033e-08	13	13	137	77
QDPR	1.75985	6.97714e-08	618	587	1725	1154
AKAP8	1.67828	7.05298e-08	1222	1354	3469	2339
CANX	1.59697	7.06467e-08	1490	1428	3528	2696
IGFL2	3.49972	7.42398e-08	23	23	296	72
EIF4B	1.49176	7.51551e-08	2305	2461	4860	4574
NME3	1.60837	7.56e-08	868	877	2079	1670
SMARCC2	1.54754	7.56361e-08	2185	2054	3975	4749
ALG3	1.68366	7.63231e-08	3374	4004	10208	6482
MTHFS	3.22137	7.72689e-08	19	16	109	121
FILIP1	1.8454	7.78134e-08	247	329	812	643
BNC2	1.54068	7.9244e-08	2042	2003	3772	4510
ZNF668	3.83778	8.24752e-08	28	3	179	137
RPUSD2	1.58898	8.39336e-08	956	966	2249	1825
UQCRC1	1.50439	8.47541e-08	16189	14240	33054	27843
GABRA2	2.38376	8.48279e-08	64	57	221	224
CALM1	1.60477	8.58905e-08	7335	6675	17779	12292
CDC73	1.6085	9.02866e-08	1943	1904	4841	3431
RHOD	1.84844	9.0958e-08	371	378	1165	737
WFDC3	2.78311	9.56358e-08	51	35	278	141
EEPD1	2.05062	9.6541e-08	117	183	449	423
ACIN1	1.53109	9.83858e-08	1397	1465	3154	2671
DPP4	2.33124	9.99656e-08	75	63	270	220
COL14A1	1.96758	1.02455e-07	137	179	418	450
GCG	8.82269	1.04698e-07	0	0	40	77
ELOA	1.5181	1.07113e-07	1193	1252	2562	2368
PSMD8	1.67062	1.12817e-07	10808	9087	27393	17351
UBE2I	1.57472	1.2054e-07	3161	3288	7948	5591
POTEF	1.65987	1.2116e-07	436	468	936	1073
ARHGAP24	2.15827	1.23259e-07	101	112	275	393
CEBPD	2.30921	1.33515e-07	97	74	366	233
MRPL11	1.69935	1.33991e-07	1464	1261	3811	2439
RSL1D1	1.62381	1.37e-07	4634	3976	11205	7533
LRAT	2.90679	1.38702e-07	83	80	702	163
SPINT2	1.55945	1.38744e-07	2010	1592	3597	3892
C19orf25	1.5577	1.41028e-07	1504	1519	3569	2703
GTF2A1	1.76003	1.44896e-07	832	535	1571	1701
PSMC3IP	2.03395	1.52962e-07	107	139	369	339
COQ9	1.58104	1.54224e-07	1741	1653	4164	2998
TBX3	1.5257	1.56247e-07	1614	1492	3458	2848
MRPL58	1.69085	1.59693e-07	1237	1129	3300	2092
MYL7	1.92683	1.65459e-07	3350	3347	12476	5506
PTK2B	1.55893	1.68603e-07	762	817	1527	1745
TGFBR3	1.79629	1.92519e-07	226	216	518	563
NCAM1	3.0298	1.95856e-07	53	24	126	318
ZFPL1	1.97356	1.99074e-07	156	148	489	353
LRCH2	2.06032	2.0399e-07	112	105	348	290
NOP14	2.0432	2.05342e-07	358	327	1364	631
HGF	2.89337	2.08154e-07	36	20	135	159
TMEM80	1.68599	2.1226e-07	1162	762	2220	2156
NDUFB10	1.60527	2.12912e-07	4258	3359	9602	6773
BRCA2	1.61134	2.14036e-07	722	757	1833	1351
CRTAC1	2.97529	2.14448e-07	29	18	124	137
CHST12	1.75635	2.17343e-07	488	495	1437	905
LURAP1L	3.52286	2.29383e-07	24	6	137	108
TMEM215	5.41098	2.33058e-07	5	2	198	14
CKAP2L	1.50516	2.34395e-07	1015	1011	1930	2118
HNRNPA0	2.50959	2.39428e-07	201	74	720	394
EFNB2	1.61204	2.41575e-07	1000	979	1774	2481
PGM5	2.16955	2.4691e-07	91	82	243	305
SMC2	1.43295	2.50429e-07	2180	2249	4179	4238
RRP9	1.64741	2.52865e-07	1252	1343	3510	2220
ANXA8L1	1.70817	2.64627e-07	293	383	738	813
ADAMTSL3	2.09207	2.80493e-07	87	136	335	332
RAC2	2.14772	2.87198e-07	83	90	242	297
RAD51AP1	1.5417	2.91122e-07	727	689	1379	1524
C1R	1.76015	3.01169e-07	267	235	558	640
IQCE	1.66942	3.1151e-07	312	337	689	763
EHMT1	1.66571	3.12903e-07	1113	995	2894	1828
ADAMTS6	1.59858	3.20154e-07	1095	1389	2225	3054
PANX2	2.02816	3.33719e-07	194	181	701	379
PYGM	2.22682	3.57733e-07	103	166	305	576
RUNX1T1	1.6819	3.58138e-07	836	1018	1630	2544
MBNL3	2.3019	3.65139e-07	154	73	469	325
ANKRD39	1.58506	3.8042e-07	556	509	1224	1029
CAPZB	1.44168	3.8648e-07	7789	6944	15574	12657
CD52	4.69156	3.86514e-07	7	1	100	47
MPPED2	2.4532	3.88995e-07	72	42	193	248
SIVA1	1.4756	3.977e-07	5756	4932	11774	9204
PCDHA12	2.71069	3.97788e-07	112	31	304	361
C21orf58	1.58244	4.05923e-07	607	700	1213	1537
MTFP1	3.86518	4.08673e-07	10	6	108	57
SCAF1	1.63555	4.13506e-07	741	556	1571	1276
CHGB	2.10166	4.26378e-07	97	88	314	246
NOP56	1.48833	4.34407e-07	8085	7941	18599	13107
DLK2	1.82644	4.50592e-07	166	168	420	414
FGFR2	1.42302	4.57962e-07	1774	1819	3248	3532
VDAC1	1.5044	4.61559e-07	1174	967	2113	2171
HMGB2	1.53111	4.77586e-07	2878	2742	6820	4638
CNTN4	2.22795	5.02723e-07	105	118	243	490
FAM174A	1.94604	5.18568e-07	297	308	1101	544
LRRC45	3.59821	5.38618e-07	19	5	88	118
ALDH3A2	1.72054	5.46778e-07	412	292	783	855
GBP1	1.87539	5.52714e-07	239	215	728	448
SF1	1.91771	5.78451e-07	332	185	740	643
CNTNAP4	6.60394	5.93573e-07	2	0	28	109
PDPK1	2.45928	6.38819e-07	201	90	811	327
IMPDH1	1.77934	6.50399e-07	983	688	2569	1491
CDK4	1.36213	6.73525e-07	5064	4891	9311	8718
CEP57	1.41762	7.02005e-07	2305	2094	3888	4390
PIEZO1	2.07663	7.13361e-07	996	370	2225	1869
LSAMP	1.41647	7.35837e-07	1413	1473	2569	2851
PPIC	1.54265	7.66552e-07	2125	2015	5151	3359
CBX1	1.34428	7.69041e-07	6046	6264	11329	10676
CDC34	1.73351	7.7306e-07	942	689	2403	1434
SUPT16H	1.36848	7.76333e-07	6965	6971	13760	11592
TRABD2B	2.5807	8.2023e-07	30	39	141	149
BCL11A	1.51432	8.26778e-07	1501	2031	4039	3053
ANKS3	1.70324	8.2666e-07	322	269	599	757
ARG2	1.47911	8.50392e-07	678	656	1360	1260
DENND1A	1.40476	8.6609e-07	1833	1964	3855	3224
CILP	3.30582	8.7866e-07	27	8	152	94
HGS	1.65629	9.02694e-07	411	313	759	851
S1PR1	2.22243	9.08295e-07	56	83	207	248
SCN7A	2.5241	9.11378e-07	38	36	163	137
BRCA1	1.45194	9.19492e-07	954	1143	1901	2130
PDZRN4	2.27332	9.21092e-07	70	52	192	224
NDUFA10	1.58077	9.32828e-07	2138	1397	4051	3428
SNCA	2.10789	9.65881e-07	81	75	254	220
ZRANB2	1.40553	1.01775e-06	1955	1799	3794	3218
LAMA5	1.82871	1.03118e-06	2542	1225	4081	5392
LBH	1.72256	1.06556e-06	326	231	637	661
NEFM	1.97373	1.06743e-06	310	338	1251	545
SMC4	1.36963	1.06878e-06	1877	2015	3695	3384
ARF5	5.6976	1.08892e-06	0	3	58	51
TMEM255B	2.20959	1.139e-06	176	111	647	294
CLSPN	1.45766	1.16199e-06	1105	1423	2662	2219
LIG1	1.68473	1.19108e-06	688	611	1100	1838
CENPU	1.51822	1.20197e-06	807	639	1564	1360
RPS6KA5	1.90507	1.21103e-06	117	182	424	362
ALKBH2	1.48319	1.23265e-06	914	773	1810	1518
BMS1	1.59984	1.28289e-06	1957	2041	5443	3104
PLPP3	1.85206	1.28853e-06	381	228	645	908
GABRG3	3.30726	1.31511e-06	17	39	68	318
POLE4	1.64453	1.31831e-06	549	529	1466	912
DNM1	1.84436	1.34757e-06	183	140	374	444
CIP2A	1.54164	1.36348e-06	427	439	975	801
IFITM3	1.34228	1.36866e-06	17954	19285	36723	29768
MCM10	1.55379	1.41625e-06	398	537	988	940
PDK4	3.15282	1.42861e-06	17	13	81	107
PRMT1	1.34878	1.50819e-06	4057	3635	7269	6545
SNRPD1	1.44989	1.52761e-06	2553	2278	5421	3893
ASPSCR1	1.41218	1.56368e-06	940	1021	1973	1701
PCBD2	1.61196	1.56926e-06	281	348	731	621
CCDC91	1.95401	1.57904e-06	163	110	428	320
KDM6B	1.69846	1.67494e-06	552	468	1478	861
HNRNPA3	1.5933	1.70109e-06	1830	1569	4568	2678
ZFPM2	1.75215	1.74221e-06	185	198	394	513
KIAA0895L	2.4157	1.74937e-06	63	35	197	173
SHCBP1	1.46995	1.77374e-06	625	610	1317	1094
PON2	1.33612	1.79332e-06	3894	3505	6390	6773
ZNF546	2.26149	1.80093e-06	65	60	262	161
CEP128	1.61776	1.87689e-06	266	336	705	594
TBCC	1.4988	1.87998e-06	1086	1044	2526	1720
ALKBH7	1.56618	1.89344e-06	1844	1676	4625	2735
PRR5	1.56372	1.95818e-06	363	339	796	667
HOXA13	3.06322	1.99102e-06	26	14	159	78
DDX39A	1.40227	2.01027e-06	1246	1109	2360	2030
EDN3	2.1499	2.01949e-06	72	100	337	200
HNRNPR	1.30861	2.06593e-06	12517	12789	24020	20137
IFT57	1.46605	2.08584e-06	1942	1541	3890	2907
MAGEF1	1.32806	2.11769e-06	2081	2244	4000	3643
C15orf39	1.3898	2.1316e-06	1123	1005	1947	1983
NEIL3	2.26544	2.16827e-06	49	53	167	178
CYBC1	1.32208	2.28266e-06	2201	2197	3762	3979
HSF2BP	2.46156	2.2892e-06	40	51	229	124
SNX4	1.66795	2.40536e-06	529	673	1712	977
RPS6KB2	1.51437	2.48597e-06	919	662	1492	1696
MOB1A	1.84668	2.49621e-06	329	222	889	514
HIST3H2A	1.77929	2.52732e-06	157	145	339	391
QTRT1	1.3148	2.63326e-06	2906	2665	5017	4751
JAGN1	1.51804	2.65263e-06	2228	1835	5033	3189
ATG2A	1.62073	2.68226e-06	287	245	540	613
SLC3A2	1.33337	2.68996e-06	11238	11489	22878	17479
THAP7	1.60009	2.72427e-06	1504	939	3017	2226
KCNAB3	2.61056	2.75769e-06	58	23	197	154
IL17B	7.74956	2.78558e-06	0	1	123	29
CNPY3	1.46183	2.84038e-06	765	631	1472	1242
CENPJ	1.40424	2.89836e-06	881	858	1781	1463
SLC7A6OS	1.51325	3.00084e-06	615	468	1157	1026
SFTPD	2.77838	3.05451e-06	17	31	124	107
NABP2	1.53524	3.08921e-06	333	311	656	659
SERPINF1	1.34923	3.17747e-06	2049	1758	3619	3223
ITPR1	1.93713	3.21901e-06	214	194	751	353
PYM1	1.36567	3.35901e-06	1301	1371	2697	2153
MAGEH1	1.37063	3.43228e-06	2019	1750	3815	3062
AP3S1	1.43613	3.4738e-06	2355	2347	5418	3555
TTLL7	1.51923	3.49356e-06	315	364	710	659
TIMM50	1.52825	3.51878e-06	3762	3917	10019	5604
PIMREG	1.36466	3.5488e-06	1824	1476	2986	3009
AREG	3.12379	3.66886e-06	26	19	219	59
GPC5	4.32693	3.67304e-06	8	1	48	80
FAM118A	1.30456	3.68232e-06	3637	4568	7047	7192
RFC2	1.39516	3.77042e-06	1807	1394	3161	2784
NSUN5	1.6774	3.78064e-06	1083	583	2109	1667
GDF6	1.30405	3.90383e-06	1599	1668	2786	2891
FAM13A	1.45765	3.92932e-06	488	539	902	1081
MAB21L2	2.15606	4.17642e-06	95	100	192	418
PCLAF	1.48167	4.2215e-06	547	452	1068	901
XRCC2	1.41452	4.25763e-06	655	817	1491	1268
ZFAND2B	1.34253	4.27436e-06	1712	1730	3445	2706
GAP43	1.37615	4.27886e-06	3760	3355	5528	7475
CSNK1D	1.51424	4.29253e-06	354	356	788	641
ASPHD1	1.33529	4.38732e-06	1555	1365	2728	2468
BOLA1	1.56287	4.41711e-06	540	369	996	902
FGF9	2.70198	4.44437e-06	18	80	202	242
CDH7	2.03432	4.48899e-06	71	126	247	318
SORBS1	2.39478	4.71907e-06	129	39	330	298
C20orf27	1.40982	4.92454e-06	2800	2452	5864	3988
BNC1	1.79597	4.9461e-06	318	305	506	1014
FKBP1C	2.37984	4.94254e-06	50	40	208	123
LIN7B	1.39877	4.95279e-06	674	723	1433	1161
ADAMTS1	1.36737	4.98532e-06	1828	1896	3931	2840
CCL7	5.00944	5.04376e-06	2	5	149	10
ZFHX4	1.36491	5.06477e-06	2641	3463	6256	4797
PXK	1.56334	5.13638e-06	274	270	625	508
NFKBID	1.65988	5.15108e-06	167	203	423	399
CPB1	8.16468	5.21632e-06	0	0	15	59
KRCC1	1.46041	5.21785e-06	1038	781	1993	1544
GALNT13	2.4452	5.26042e-06	42	32	119	165
CENPF	1.23206	5.27693e-06	8798	9365	15168	14858
CASC3	1.74358	5.31239e-06	226	270	745	425
TCERG1	1.42484	5.31105e-06	3379	3540	8049	5048
PRKRA	1.354	5.35078e-06	1556	1530	3168	2393
HILPDA	1.26864	5.36069e-06	3362	3623	6357	5491
TUBB6	1.39855	5.37731e-06	13153	10722	26424	18043
CHRM2	3.22966	5.49165e-06	13	19	52	158
CNTN6	1.74571	5.50872e-06	159	149	318	409
RRBP1	1.4675	5.53021e-06	3157	3538	8206	4842
ARL6IP6	1.45889	5.66665e-06	432	520	1015	826
EEF1A2	2.07131	5.67574e-06	127	65	270	301
GATD1	1.48362	5.70062e-06	493	473	1101	804
CDCA8	1.55415	5.72481e-06	456	327	761	862
MT1E	2.16878	5.72813e-06	124	125	580	211
LDOC1	1.34044	5.78279e-06	2482	2319	4910	3665
ACD	1.39887	5.79381e-06	3172	2195	4896	5101
MRPS25	1.39758	5.90926e-06	1921	1734	4022	2774
RNPS1	1.26574	5.95274e-06	4771	4185	7705	7478
HOXC6	3.33273	5.97305e-06	21	5	93	93
POLD1	2.16707	6.05708e-06	263	109	390	792
C11orf1	1.42159	6.0692e-06	789	754	1687	1228
GATD3B	2.04728	6.07973e-06	59	91	217	218
DDX49	1.41377	6.21332e-06	516	482	981	893
CLASRP	1.67319	6.52897e-06	209	227	398	579
NDC80	1.38068	6.57599e-06	1370	1376	2957	2084
SHLD1	1.73043	6.60334e-06	252	166	550	431
SAFB2	1.35865	6.9435e-06	1444	1524	3112	2251
ATP5PF	2.58433	6.96224e-06	53	25	218	114
NCAPG	1.42906	7.00983e-06	583	622	988	1293
NDUFAF3	1.32739	7.14831e-06	4407	3507	7724	6300
IL18R1	2.21748	7.17254e-06	60	122	397	197
POLD2	1.24485	7.20279e-06	7537	6634	11892	11784
NOC4L	1.85561	7.30293e-06	856	419	2143	1134
HDGFL2	1.66452	7.38841e-06	339	235	757	530
PHYHD1	1.33969	7.44466e-06	1211	1059	2207	1846
PARPBP	1.57004	7.64508e-06	234	327	627	543
TEDC2	1.40041	7.78915e-06	633	535	1140	1035
EXO1	1.66544	7.83989e-06	181	193	359	475
IMP4	1.40497	7.84726e-06	3349	2788	6910	4570
VCAN	1.40058	7.94176e-06	9154	9846	21948	13412
NASP	1.25414	8.09816e-06	9196	10449	18258	14723
SPSB2	1.42547	8.15239e-06	544	600	1239	925
MVD	1.51489	8.21844e-06	1949	1185	3592	2749
ACADM	1.3673	8.27722e-06	832	882	1769	1346
SDF4	1.48481	8.3252e-06	586	520	1301	884
MYO3A	2.85496	8.37068e-06	37	14	91	170
MANF	1.8262	8.414e-06	1448	1368	5203	1857
EEF2KMT	1.50183	8.44453e-06	407	415	968	673
MAGOH	1.85063	8.65555e-06	1029	850	3523	1274
CRYGC	6.06432	8.66439e-06	2	0	68	27
FLRT3	1.44372	8.67595e-06	964	1186	1645	2459
NIFK	1.56783	8.6798e-06	1067	993	2828	1485
MTOR	1.36549	8.81586e-06	1383	1188	2677	1999
FBXL15	2.16719	8.94558e-06	162	74	500	253
KHSRP	1.69163	9.28397e-06	860	416	1352	1567
EXOC3L4	7.98838	9.33565e-06	0	0	49	17
HSPA9	1.3986	9.51291e-06	3168	3294	7430	4583
NANS	1.35424	9.61332e-06	3129	2743	6267	4331
ATF7IP	1.41946	9.61311e-06	373	419	739	751
HOXA7	5.14803	1.00088e-05	4	0	73	28
PCDH7	1.21785	1.00574e-05	3307	3646	5820	5559
RPS19BP1	1.48062	1.01342e-05	2260	2307	5802	3190
KIF15	1.42603	1.01545e-05	376	443	824	724
MLX	1.44169	1.02226e-05	349	340	653	665
TMEM134	1.30196	1.03088e-05	1899	1822	3670	2799
DHRS7	1.35128	1.03186e-05	1533	1271	2862	2189
DBF4	1.37071	1.08371e-05	559	530	938	1045
NPDC1	1.61397	1.09564e-05	848	590	1997	1119
SBF1	1.47271	1.10887e-05	1562	970	2728	2245
TBX20	2.78	1.11513e-05	29	27	69	201
COQ4	1.47549	1.13574e-05	336	428	837	657
SIRT6	1.39705	1.14298e-05	576	479	941	1018
BPHL	1.4733	1.14344e-05	362	315	721	605
MFF	1.34242	1.14462e-05	2841	2354	5407	3896
HOXB4	2.01731	1.15366e-05	60	77	215	175
EGFL7	5.91866	1.22282e-05	1	1	31	54
PYCR1	1.22172	1.22603e-05	4571	4101	6920	7332
PHGDH	1.25583	1.23352e-05	1391	1372	2229	2416
ARAP2	1.93462	1.26274e-05	69	87	203	216
MAPKAPK3	1.60915	1.28459e-05	171	244	465	424
SRRT	1.192	1.28684e-05	4667	5006	7734	7816
TMEM187	1.47618	1.30952e-05	484	377	956	736
ATP2B1	1.30711	1.31762e-05	2151	2352	3316	4514
MYRF	1.24117	1.31866e-05	3225	3801	6395	5290
UFL1	1.20468	1.32698e-05	2755	2838	4522	4552
ZSWIM9	1.59742	1.34018e-05	356	502	1149	677
LTBP4	1.75489	1.36747e-05	391	187	677	705
EZR	1.18179	1.37525e-05	20722	20595	34939	31091
CIAO1	1.33716	1.37991e-05	4059	4559	9284	6055
CEP295	1.38917	1.37937e-05	396	405	743	734
ZFR	1.42652	1.3886e-05	4810	4730	11580	6517
POPDC2	2.97468	1.38955e-05	14	17	62	109
PNMA8A	3.79879	1.39475e-05	6	5	62	46
GUCY1A1	1.23028	1.41257e-05	2001	1888	3361	3069
C17orf51	1.54321	1.41462e-05	204	226	469	413
YBEY	1.86668	1.4442e-05	355	191	935	478
RASL11A	4.20227	1.44841e-05	4	5	24	92
RFC1	1.28048	1.45328e-05	2070	2142	4134	3076
LRRN4	1.60094	1.45473e-05	726	414	1425	1025
DAPK3	1.59883	1.46665e-05	739	457	1569	997
SLC25A39	1.21622	1.47211e-05	2668	2457	4302	4090
IFT22	1.28236	1.51778e-05	1017	991	1867	1575
RABEP2	1.35617	1.52895e-05	465	467	847	833
ST6GALNAC4	1.36076	1.54113e-05	799	629	1374	1215
MCM6	1.28514	1.56613e-05	1164	1090	2131	1742
OR51E1	7.85177	1.57484e-05	0	0	42	18
ARHGEF39	1.38773	1.59902e-05	584	618	942	1269
HNRNPU	1.44456	1.60312e-05	2190	2263	5506	3044
AGPAT3	1.44567	1.62176e-05	1469	1172	3156	1929
ASPM	1.32819	1.63327e-05	1554	1416	2211	3038
WDR60	1.34202	1.67732e-05	740	840	1612	1208
GFRA2	2.11009	1.68399e-05	96	171	227	578
OFD1	1.25559	1.70688e-05	1400	1341	2513	2100
CD82	1.36248	1.73237e-05	2200	2209	4922	3074
REXO1	2.19487	1.73669e-05	153	54	416	258
HSD3B2	3.31051	1.76296e-05	36	8	259	53
HIRIP3	1.24803	1.76425e-05	1136	1354	2111	2047
RGS4	1.22951	1.77882e-05	2439	2208	4142	3542
BOLA3	1.65279	1.81284e-05	737	698	2212	976
RTL8B	2.00986	1.82224e-05	85	56	189	212
SETD9	1.60858	1.83945e-05	295	197	591	470
FBXW5	3.72493	1.83845e-05	709	214	5470	3226
YEATS4	1.35615	1.84604e-05	1120	989	2248	1563
PJA2	1.51894	1.85512e-05	2947	2685	7659	3745
BCL3	1.44854	1.86207e-05	373	422	893	635
C12orf65	1.34571	1.86707e-05	891	759	1679	1281
NUDT22	1.34876	1.89817e-05	1573	1122	2632	2219
ZNF287	1.56004	1.90181e-05	341	238	680	527
ABHD14A	1.45617	1.92186e-05	281	326	645	527
FANCL	1.3371	1.97083e-05	501	616	1038	946
TRMT13	1.38802	2.00331e-05	384	373	743	653
TMEM106C	1.27789	2.02025e-05	796	769	1281	1391
HOXC5	7.78537	2.02542e-05	0	0	19	38
SNCAIP	2.64369	2.0328e-05	70	15	190	188
GTPBP6	1.76342	2.09631e-05	154	349	659	536
PHF19	1.41376	2.12936e-05	871	935	2109	1283
SLC38A5	1.73393	2.16594e-05	293	150	559	485
NCAPD2	1.3398	2.16908e-05	622	548	1141	948
GINS4	1.38911	2.17519e-05	429	384	697	803
CPA1	3.21628	2.20205e-05	20	5	86	79
HOOK1	1.77235	2.20144e-05	205	206	323	663
GGH	1.29939	2.22614e-05	3574	2495	5259	5293
NR2F2	1.30409	2.22865e-05	3431	2927	6560	4526
RIPOR3	1.9363	2.31378e-05	153	134	232	540
AURKB	1.17913	2.36372e-05	3295	3702	5311	5829
PIBF1	1.48407	2.38944e-05	223	295	524	494
ECHS1	1.25424	2.39911e-05	4325	3368	7075	5885
CDKN3	1.34724	2.41301e-05	599	523	1113	901
TCF21	2.00009	2.43984e-05	76	56	208	165
SMCO3	2.04461	2.46816e-05	62	60	214	141
MTG1	1.40467	2.47249e-05	311	309	589	567
MALSU1	1.47834	2.48286e-05	1236	1298	3280	1701
ELF2	1.23001	2.53261e-05	1184	1394	2025	2225
TOE1	1.25706	2.53126e-05	729	809	1306	1280
PLAGL1	1.25112	2.54895e-05	2131	2163	4159	3045
SMARCA1	1.22139	2.58431e-05	3131	3267	5985	4526
BEX3	1.16378	2.65335e-05	5687	5950	9921	8440
GATA6	1.80308	2.68682e-05	82	101	234	215
C9orf16	1.2036	2.70564e-05	2779	2848	5094	4037
PLEKHJ1	1.19418	2.71654e-05	5666	5662	10270	7998
SSX2IP	1.36471	2.79834e-05	691	763	1581	1057
QTRT2	1.28608	2.86829e-05	598	629	994	1111
PDZRN3	1.22635	2.90851e-05	1020	1118	1877	1644
NEFH	1.58429	2.91575e-05	411	490	1267	637
EMP2	1.26548	2.91847e-05	1891	1790	2644	3583
EMD	1.42948	2.96025e-05	982	979	2384	1343
IFT27	1.25008	2.96285e-05	1609	1760	3246	2398
IKZF4	1.36345	2.96699e-05	485	550	805	1066
AQP1	1.34952	2.96964e-05	7195	7111	16312	9412
CSNK1A1	1.25461	2.99859e-05	2441	2638	5014	3524
MVB12A	1.26636	2.99824e-05	943	920	1768	1391
CYB5A	2.29962	3.01223e-05	36	34	139	104
EPB41	1.28014	3.03587e-05	558	599	974	1003
IFITM2	1.22722	3.05614e-05	2432	2524	4694	3482
SENP1	1.28963	3.10852e-05	568	559	1026	915
SOX15	1.3736	3.1359e-05	356	381	617	726
MED16	1.34407	3.20758e-05	502	444	927	767
DPP9	1.40385	3.23981e-05	399	333	753	614
HMGB1	1.13649	3.25323e-05	14363	14389	23831	20699
SNAP29	1.32113	3.25587e-05	1565	1542	3341	2135
NTF4	1.62633	3.30328e-05	167	132	309	342
RLF	1.39604	3.37884e-05	1519	1471	3552	2002
TSHZ2	1.7532	3.41227e-05	213	252	344	755
GJA4	3.13979	3.47664e-05	6	23	59	119
WT1	5.4892	3.51784e-05	17	2	189	418
ROGDI	1.69902	3.55776e-05	123	119	320	234
CLPP	1.27401	3.58146e-05	3664	3627	7534	4902
ITGB8	1.75596	3.62967e-05	213	264	350	779
CDC27	1.38131	3.72897e-05	705	511	1261	978
VSIR	1.63657	3.74961e-05	626	732	2103	875
PCDHAC2	1.62904	3.75034e-05	224	163	345	499
HEATR6	1.22594	3.75438e-05	801	792	1321	1303
TUFM	1.16514	3.77562e-05	10974	9879	18181	14804
DPP7	1.62863	3.82045e-05	177	141	299	394
SMIM10	6.94558	3.83323e-05	1	0	50	37
C17orf80	1.80797	3.84853e-05	220	224	786	312
CDC40	1.4982	3.89917e-05	185	245	413	440
CENPK	1.18482	3.91442e-05	1237	1242	2055	1914
UBE2T	1.23832	3.95649e-05	733	775	1336	1169
PLA2G12A	1.34646	3.98921e-05	495	434	746	918
RRS1	1.7415	4.00971e-05	193	183	602	286
CEP290	1.17724	4.0286e-05	1457	1533	2530	2231
CCDC194	2.35621	4.14415e-05	40	26	140	99
SFSWAP	1.20231	4.18573e-05	1977	1780	3378	2720
ARID4B	1.14051	4.20481e-05	3660	3710	6131	5314
SULT1E1	3.3837	4.22161e-05	4	13	57	67
CLDN9	4.1618	4.24603e-05	6	2	25	76
COA7	1.20861	4.25442e-05	1456	1221	2161	2202
LTBP3	1.82364	4.26005e-05	293	156	755	373
STAG1	1.41003	4.27688e-05	265	363	599	573
ARHGAP5	1.13083	4.3203e-05	3084	3320	5097	4773
BACH2	1.48986	4.3852e-05	399	415	591	1015
CRCP	1.59432	4.38456e-05	165	134	332	305
ARFIP2	1.27217	4.39871e-05	1122	875	1852	1554
HSD17B7	1.41372	4.41197e-05	272	249	483	495
INMT	1.64254	4.4743e-05	3581	3878	12092	4352
CDC45	1.21346	4.49823e-05	902	836	1438	1402
PRCD	6.92012	4.51877e-05	0	1	33	52
THOC6	1.13662	4.52433e-05	2437	2631	3843	3996
WDR74	1.97125	4.52496e-05	156	75	415	228
SSRP1	1.21539	4.55674e-05	2331	2661	3492	4651
POLR1C	1.21891	4.55856e-05	2986	2666	5359	3925
MIA3	1.23506	4.56346e-05	772	950	1513	1337
EPHX2	1.51993	4.59598e-05	335	303	482	805
CRYBG3	1.9774	4.7577e-05	70	141	384	199
GPX4	1.26777	4.79043e-05	4495	3389	7789	5629
GARNL3	1.46915	4.79838e-05	571	743	918	1632
HMCN2	2.3062	4.85436e-05	64	39	104	255
PLSCR4	3.29485	4.88815e-05	11	6	66	52
RUFY1	1.4234	4.92789e-05	487	486	1150	691
TECRL	2.78779	4.94581e-05	31	27	51	230
CCDC8	1.14979	5.03504e-05	1813	2119	3128	3007
ITGA6	1.76212	5.05654e-05	99	89	198	251
GTSE1	1.16811	5.08937e-05	1325	1567	2296	2273
BUB1B	1.27918	5.087e-05	1029	822	1411	1756
TSC1	1.47134	5.14137e-05	4200	4766	12049	5485
GUCY1B1	2.03958	5.19411e-05	74	43	161	179
GADD45G	2.91342	5.20713e-05	9	21	63	95
HECTD1	1.15939	5.27177e-05	1311	1341	2153	2018
MAMSTR	1.58031	5.29195e-05	130	178	340	307
HNRNPDL	1.13469	5.29649e-05	3954	3959	6677	5565
DISP1	1.39574	5.30458e-05	326	298	512	644
KIF11	1.22659	5.31472e-05	1056	1022	1515	1907
TEX2	1.47722	5.4311e-05	232	190	437	392
ARID3A	1.10622	5.48756e-05	6618	6685	10681	9491
CALB2	1.87585	5.49044e-05	460	640	2212	634
MRPS2	1.31228	5.53911e-05	1281	1154	2614	1655
DHDH	1.96112	5.56584e-05	63	170	270	363
CRABP1	1.25923	5.72657e-05	730	734	1078	1387
DHX30	1.1731	5.77454e-05	3209	2661	5057	4285
HDDC3	1.49469	5.77841e-05	322	216	590	482
DCPS	1.23816	5.90269e-05	967	975	1857	1372
PTN	1.16579	5.9121e-05	2177	2163	3070	3781
MYH10	1.2453	6.01777e-05	2754	3043	3870	5783
LSR	1.92579	6.05044e-05	100	68	166	284
CASP6	1.13901	6.10651e-05	3026	2723	4764	4164
DDX59	1.47258	6.13329e-05	326	290	744	463
NFKBIB	1.61265	6.29325e-05	307	334	947	436
MPDZ	1.10132	6.34394e-05	3450	3749	5500	5368
ACOX3	1.31877	6.5563e-05	1063	1063	2326	1415
PSMA7	1.17772	6.64902e-05	15001	14182	27371	19199
BCLAF1	1.18731	6.66902e-05	5007	5278	9741	6765
COQ7	1.27523	6.69857e-05	536	461	893	809
STOML2	1.12256	6.74384e-05	9414	8139	14428	12533
PRKDC	1.20734	6.76413e-05	4527	3931	8103	5685
CABIN1	1.38428	6.79482e-05	899	846	2065	1151
TMEM258	1.39257	6.9424e-05	265	237	472	457
EGFLAM	1.53317	6.97342e-05	629	828	2037	933
HIVEP1	1.47401	7.01929e-05	288	254	647	416
ICA1L	1.35271	7.07931e-05	349	290	580	571
HTATSF1	1.23971	7.16428e-05	3012	2795	5873	3805
FUCA1	1.37849	7.25356e-05	576	413	1050	768
EXTL2	1.12301	7.39216e-05	1766	2018	2976	2821
MAD2L2	1.1737	7.40217e-05	3923	3688	7029	5082
CCDC121	4.39652	7.46748e-05	2	3	37	37
DZIP1L	1.2719	7.4916e-05	773	659	1400	1041
PPP1CA	1.10798	7.51065e-05	11771	10373	18032	15633
GBP2	1.61098	7.54099e-05	161	139	390	257
C1orf159	2.28009	7.57516e-05	23	52	133	122
ZNF322	1.29478	7.60765e-05	420	507	891	709
R3HCC1	1.09413	7.64745e-05	3245	3253	5059	4711
ADRB3	6.78667	7.64803e-05	1	0	49	29
TFAP4	1.34615	7.68696e-05	374	483	658	871
TEX264	1.10452	7.70823e-05	2946	2979	4773	4201
ERCC5	2.30485	7.74895e-05	27	36	131	88
GCK	1.94373	7.78304e-05	49	72	182	145
B3GNT8	1.66737	7.90768e-05	109	103	213	261
COQ6	1.73382	7.95366e-05	170	121	446	239
PRDX4	1.19147	7.95364e-05	941	907	1640	1335
USP10	1.14579	8.05118e-05	2777	2312	3778	4161
ERBB4	1.82012	8.12033e-05	111	112	182	371
APOBEC3B	1.72738	8.17413e-05	102	85	244	193
G0S2	2.70854	8.20671e-05	19	15	97	60
NKX2-5	1.91918	8.23216e-05	168	103	519	208
ISOC1	1.37327	8.25652e-05	284	247	503	467
GPR158	2.65584	8.3976e-05	17	27	58	136
PEPD	1.36966	8.44641e-05	3065	1652	4097	4530
CYB5R2	1.16274	8.46712e-05	1215	1237	1756	2106
NR0B1	2.77113	8.46229e-05	15	30	165	51
CSRP2	1.18221	8.46653e-05	18007	16274	32670	22235
HOXB13	2.88575	8.61115e-05	7	25	72	93
CHD3	1.21309	8.68436e-05	2959	4071	4873	6556
BCKDHB	1.28467	8.70365e-05	533	437	774	892
SMIM11A	1.82479	8.7268e-05	103	144	422	194
ENOX2	1.54089	8.7442e-05	288	293	789	404
GLRX2	1.83929	8.79753e-05	207	205	780	262
DOK1	1.20202	9.00923e-05	597	710	1066	1048
CFAP44	1.61719	9.14261e-05	230	127	387	388
SCO1	1.24052	9.15513e-05	1202	1023	2176	1536
PRKCZ	1.99073	9.29842e-05	114	48	197	259
RUVBL2	1.10688	9.30285e-05	3797	3469	5965	5070
NME6	1.09125	9.55924e-05	4429	4376	7175	6044
LRRC2	1.96027	9.57897e-05	146	62	364	211
CDK5RAP2	1.11378	9.70166e-05	3087	3422	5502	4415
EMP3	1.29178	9.84014e-05	4357	3137	7951	5029
JAK1	1.27919	9.83575e-05	1035	996	2140	1338
GNB4	1.38049	0.000100087	905	1037	2338	1226
SDR39U1	1.27359	0.000100582	375	430	640	728
GPC6	1.10296	0.000101921	2388	2385	3362	3853
YJU2	2.02769	0.000102204	88	39	188	179
FGF7	2.71941	0.000102852	18	13	67	77
RBBP8	1.40392	0.000103002	201	212	375	394
STXBP4	1.57842	0.000103761	124	198	379	296
TSPAN3	1.08398	0.000104455	5164	4826	8012	6917
CDCA3	1.19011	0.000105235	595	697	1056	1017
DHX9	1.06398	0.000105414	5046	5243	7316	7821
WIPF3	1.21034	0.000106229	753	953	1551	1225
ARL4A	1.34019	0.000106505	1895	1799	4328	2276
LRSAM1	1.42773	0.000106573	350	464	972	569
SLIT3	1.21346	0.00010652	3026	2889	3830	5817
AHNAK	1.19721	0.000107068	935	897	1690	1272
PPP1R9A	1.44192	0.000108041	329	371	492	843
FLYWCH2	1.28182	0.000108779	2116	1580	3866	2489
CTSH	1.301	0.000109083	346	323	625	537
RHBDD2	1.07962	0.000109167	5294	5359	8647	7215
PLPP2	1.36912	0.000109714	476	397	972	621
SHOX2	3.24814	0.000109867	12	7	95	33
TPD52L1	1.38005	0.000111196	246	221	454	403
KIF18A	1.35419	0.000112356	235	258	464	423
IL1RL1	3.75793	0.000113085	7	11	161	11
MRPL4	1.25231	0.000113631	1290	1436	2824	1752
KCNH2	1.53361	0.000114835	171	197	291	457
EPB41L3	1.40377	0.000115305	328	323	472	739
MRPL24	1.18615	0.000115737	4389	4553	8707	5638
RABL2A	1.24348	0.000116466	404	409	664	691
RPS23	1.22231	0.000117558	907	679	1351	1262
BRCC3	1.13565	0.000117948	1802	1733	3083	2393
GUCA1A	1.17395	0.00011816	1269	1074	2069	1662
AC118549.1	1.32607	0.000118385	544	399	949	722
SPHK2	1.91896	0.000118773	55	61	183	126
TPM3	1.14535	0.000119336	5033	4971	9189	6415
RASGRP1	1.6379	0.000120126	167	116	377	246
ZMIZ1	1.09552	0.00012062	4453	5229	6611	7925
RBSN	1.09661	0.000120579	2373	2441	3972	3280
CDH11	1.05483	0.000120576	6388	7239	10354	9562
CCDC18	1.17077	0.000122278	631	674	1074	994
EIF3I	1.18206	0.000123225	11909	10296	21433	14146
NXPH2	5.85924	0.00012423	11	1	111	384
SLC52A2	1.23331	0.000128138	1717	1456	3194	2075
NPM3	1.27743	0.000128725	631	585	1248	832
VRK2	1.31374	0.000129288	600	416	816	967
CLPTM1	1.4055	0.000129378	1204	634	1932	1519
SPOP	1.05618	0.000130355	3530	3699	5513	5070
PRICKLE1	1.19202	0.000130315	838	903	1613	1189
EXOSC2	1.15631	0.000130742	933	926	1617	1303
EN1	6.71832	0.000130995	1	0	18	56
GSTM3	1.19289	0.000131467	1968	1757	3582	2429
AFAP1L2	1.61646	0.000135833	582	482	1681	628
KAT6A	1.15708	0.000135997	1184	1202	2143	1607
CD22	2.51262	0.00013616	25	17	69	100
TMEM184A	2.1719	0.000136773	28	45	132	99
MRPL16	1.18119	0.000137978	3606	2642	5631	4383
DKC1	1.11533	0.000138845	4844	4854	8575	6236
OXR1	1.22469	0.00013916	571	582	1086	813
EMG1	1.13987	0.000139498	1297	1205	2165	1723
MATN1	2.04314	0.000139809	37	54	112	151
HAUS4	1.45477	0.000140702	202	182	316	425
RPP40	1.27395	0.000141228	653	595	1283	847
PDIA6	1.20927	0.000143233	7579	6827	14623	8897
IKBIP	1.4444	0.000143631	2606	2308	6639	2817
TMSB15A	1.30727	0.000143952	636	506	1199	798
RPP25L	1.10027	0.000144217	1717	1948	3020	2510
AKR1B15	1.90202	0.000144474	63	77	129	238
TMED1	1.13683	0.00014507	1322	1087	1897	1840
LIMD2	1.19829	0.000145776	2576	2548	5091	3203
THSD7A	1.69908	0.000146657	90	125	303	188
TMEM167B	1.84448	0.000149537	102	60	247	165
ZNF629	1.518	0.000150436	175	135	279	347
FBXW9	1.2265	0.000152142	529	660	1107	850
XPO1	1.16072	0.000152348	793	743	1321	1100
NSD1	1.1162	0.000153083	1656	1545	2718	2175
CASP8AP2	1.09878	0.000154056	1910	2019	3298	2629
ADGRA2	1.15201	0.000154507	1325	1149	1730	2143
WARS2	1.16357	0.00015643	726	641	1109	1050
YARS2	1.19425	0.000157953	940	916	1761	1234
ASRGL1	1.33234	0.000164703	243	235	442	406
GEMIN8	1.15472	0.000165006	793	725	1286	1097
H2AFY	1.11747	0.000168551	5197	5460	9596	6699
CD46	1.30099	0.000168773	519	425	977	666
VTI1B	1.23654	0.000173525	1459	1376	2945	1770
FAF2	1.03987	0.000174064	5268	5244	8161	7066
CDK2AP2	1.32217	0.000175219	390	418	871	553
RAI14	1.28366	0.000175725	8286	8525	19127	9754
THY1	1.42396	0.000175915	5330	5207	14159	5816
BAZ1B	1.19842	0.000179388	6345	7312	13837	8244
SLC22A17	1.1698	0.000180563	1543	1111	2053	2163
SMC5	1.04749	0.000181364	2512	2459	3755	3483
CHURC1	1.18123	0.000182304	686	802	1353	1022
ATXN10	1.02487	0.000182983	4391	4538	6546	6245
FKBP14	1.49448	0.000183682	3149	3185	9216	3393
RGS2	1.67606	0.000184827	1480	1332	4947	1413
C22orf46	1.09477	0.00018673	1239	1279	2058	1730
TRAF5	1.55071	0.000188714	138	112	287	230
ACBD6	1.09426	0.000191226	1160	1071	1725	1632
SERINC5	1.22472	0.000191911	509	444	708	861
ZNF428	1.65891	0.000192115	253	228	775	299
MTPN	1.21472	0.000193565	3161	2793	6116	3644
CSKMT	1.23462	0.000194058	381	360	657	572
STAP2	1.2731	0.000199385	597	524	763	1144
TMEM177	1.07885	0.000201898	1445	1445	2325	1976
GTPBP4	1.23632	0.000202457	7701	7659	16558	8981
MLLT6	6.53354	0.000202525	0	1	25	40
PLAC1	1.3849	0.000204677	179	185	326	343
KIF20A	1.18048	0.000205892	1246	1120	2255	1530
RPL19	1.07006	0.000206487	2624	2412	4094	3362
UTP20	1.20893	0.000206925	386	388	648	612
MZF1	1.20577	0.000207332	422	392	670	653
DGKZ	1.39635	0.000209274	689	357	982	968
IGBP1	1.0806	0.000210578	1443	1288	2100	1972
CENPE	1.04895	0.000210707	2016	1997	2809	3036
CCNA2	1.1186	0.000211297	1080	1016	1449	1755
GDNF	1.96609	0.000211285	39	73	183	124
SSSCA1	1.14199	0.000211164	2867	2534	4998	3416
XPC	1.26456	0.000214055	711	744	1544	921
TSEN15	1.45017	0.000214429	887	708	2141	943
PLEKHA4	1.39936	0.000215177	186	273	379	470
GLCE	1.24567	0.000216906	309	346	580	513
SCUBE1	3.5854	0.000218215	7	3	49	36
SEC13	1.10265	0.00022236	10251	10080	18312	12479
U2SURP	1.06362	0.00022226	2299	2563	3958	3196
FAM161A	1.12408	0.000223346	875	787	1202	1350
MRPS35	1.06345	0.000224957	2426	2346	3890	3140
RFC4	1.096	0.000225943	1613	1398	2480	2061
SPEN	1.15691	0.000226669	2242	2554	4578	2955
SELENOH	1.06013	0.000227675	2240	2165	3551	2923
RNF219	1.14767	0.000230894	667	649	1132	923
AVPI1	1.26005	0.000233716	368	515	837	649
LIFR	1.2193	0.000237759	433	557	719	899
KIDINS220	1.11266	0.000237807	2313	2305	4145	2896
USP16	1.27147	0.000239166	869	719	1695	1014
SLC7A4	1.48188	0.000243331	180	130	282	329
ZHX1	1.56966	0.000243712	220	266	708	309
PARG	1.13088	0.000244091	748	783	1063	1295
FIGNL1	1.52612	0.000244524	312	241	765	362
PPIH	1.20547	0.000244754	697	581	1203	878
STAG2	1.0693	0.00024663	1869	1577	2585	2515
U2AF1L5	1.2165	0.000246627	510	541	1012	709
DNMT1	1.00179	0.000248812	4851	4961	6869	6962
ZSCAN12	1.22299	0.000251213	352	346	615	533
FXYD5	1.30205	0.000256844	429	378	859	546
PRDM6	1.29666	0.000260084	261	231	432	420
NOB1	1.14916	0.000262373	984	963	1787	1258
CBX8	1.41725	0.000263467	194	163	382	291
NEK2	1.35533	0.000267861	297	273	404	622
ZFR2	1.38454	0.000273296	832	410	1122	1175
MEAF6	1.31174	0.000276162	457	316	778	579
POLR2L	1.10464	0.000282809	4845	4658	8641	5775
RSPO4	1.93796	0.000285991	56	60	103	209
KIAA0100	1.11778	0.00028821	1077	898	1659	1366
CRIP2	1.30393	0.000292229	4780	5147	11827	5467
PDSS1	1.43439	0.000292673	203	151	382	294
ZEB1	1.15574	0.000295894	1213	1162	2249	1484
ARHGAP28	1.23831	0.000296584	715	641	875	1376
FANCA	1.10372	0.00029707	822	778	1124	1297
TMEM9B	1.2268	0.000300113	807	764	1617	978
TIMM10	1.10925	0.000302441	2234	2285	4102	2771
PTGFR	2.01008	0.000304413	37	53	161	94
FAM98B	1.32084	0.000305302	478	490	1103	603
TRMT61A	1.22379	0.000307568	632	685	1336	832
CENPBD1	1.38775	0.000307669	382	224	513	608
SETMAR	1.26998	0.000308685	246	251	439	405
TMIGD2	2.45178	0.000310408	29	15	64	106
TP53BP1	1.07545	0.000312758	2055	2200	2708	3595
HSPD1	1.10289	0.000316442	10635	10335	19315	12459
CFAP298	1.25421	0.000317642	269	269	480	424
NFIB	1.07844	0.000323552	1281	1712	2120	2317
RIBC2	2.28046	0.000324055	23	25	76	88
BLVRB	1.06336	0.000327189	4834	4851	8353	5916
ZNF599	1.43536	0.000328117	209	238	547	305
NELFA	1.1836	0.000328653	732	677	922	1330
SNX5	1.10747	0.000330699	1994	1943	3564	2419
DTX2	1.41955	0.000333211	269	163	397	420
GCAT	1.15457	0.00033542	2227	2011	4109	2552
FMO1	2.16247	0.000335602	68	30	94	216
SPTBN1	1.16299	0.000337308	18049	18717	37096	20974
ASB1	1.20682	0.000337742	886	892	1809	1086
HOXD10	3.37147	0.000341289	4	15	118	20
SNRPF	1.14147	0.000341521	2151	2028	3993	2513
PENK	1.7515	0.000344615	278	165	792	267
YJEFN3	3.73044	0.000347859	8	1	50	35
PDE6D	1.40471	0.000348634	626	514	1465	670
AHI1	1.04553	0.0003524	998	1082	1526	1495
SLIT2	1.00269	0.000352141	21108	23089	34844	27515
CTXN1	2.06291	0.000352598	108	29	203	204
PIM3	1.17474	0.000353151	446	384	656	665
STRA6	1.0384	0.000357928	2248	2622	3916	3123
WDR86	1.59645	0.000361419	135	82	236	228
YWHAB	1.23303	0.000369103	4843	4203	9911	5117
PFDN1	1.38608	0.000369957	179	160	350	275
LAMTOR1	1.00572	0.000370547	10368	10240	16346	12820
EFNB3	1.10339	0.000370921	993	986	1289	1702
RNFT2	1.23008	0.000370786	2635	2874	6015	3099
MBP	1.28831	0.000371955	381	410	517	840
ENOX1	1.35938	0.00037308	434	253	558	688
STRIP2	1.26769	0.000373171	252	348	555	460
ASIC3	2.29533	0.00037493	42	17	84	121
RSRP1	1.4099	0.000376012	502	574	624	1381
LRRC14	1.15335	0.000380368	459	416	715	657
CA11	1.14236	0.000384646	624	636	842	1114
PQBP1	1.06703	0.000385764	2406	2562	4296	3038
B9D2	1.25507	0.000388735	526	457	1025	632
SUMO3	1.02711	0.000388927	2678	2524	4160	3315
DMC1	1.85973	0.00039046	68	42	129	153
TAC3	1.14634	0.000390909	442	432	651	711
PRELID2	1.2848	0.000394987	211	260	435	372
SYNCRIP	1.09435	0.000399286	7980	7469	14189	9090
FAM136A	1.03008	0.000399737	2517	2291	3835	3090
MAN1A2	1.12531	0.00039963	2499	1868	3917	2817
INHBB	2.49518	0.000404295	36	25	200	44
MFSD5	1.09828	0.000404132	2682	2630	4851	3171
NOP58	1.02349	0.000405241	5663	6125	9673	7206
HIST1H1E	4.80117	0.000405929	2	2	4	74
ARPC2	1.18758	0.000407908	23877	23840	50274	26435
HMGN2	2.03932	0.000408886	44	33	87	136
HDAC5	1.06174	0.000409512	1058	971	1389	1594
STX18	1.05237	0.000413141	1220	1213	1975	1581
OGFRL1	1.16401	0.000415925	468	529	902	671
CDT1	1.07376	0.000416138	948	1008	1292	1603
TSPAN18	1.98891	0.000417673	51	41	89	168
ERCC6L2	1.25617	0.000418131	259	255	393	471
PIP5KL1	1.36242	0.00041954	154	221	354	323
MRPL19	1.07608	0.00042103	1238	1018	1815	1542
TNKS1BP1	1.22452	0.000424431	553	381	714	827
CLPX	1.09394	0.000426757	960	842	1519	1195
PSMD7	1.0519	0.000428782	5629	5230	9335	6549
HSDL2	1.03248	0.000429401	1753	1534	2234	2504
NR2C2AP	1.28116	0.000432821	205	252	417	364
AP1AR	1.58123	0.000434567	108	79	198	197
CLUAP1	1.05296	0.000435176	1477	1608	2568	1940
ADRA2A	2.63138	0.000435684	20	13	43	101
GALNT9	4.02415	0.000435712	7	0	32	49
SMNDC1	1.36113	0.000439627	302	269	663	373
BAIAP2	1.06441	0.000440466	763	722	1110	1078
MED25	1.48269	0.000446791	196	117	337	282
RBM28	1.02429	0.000446928	1834	2012	3068	2440
GNGT1	1.77715	0.000448924	55	56	146	122
RADIL	1.78679	0.00044965	58	51	127	138
FAM161B	1.32292	0.000452465	200	277	362	475
NKIRAS2	1.01745	0.000458213	10066	9496	16076	11854
RIMS2	1.12508	0.000464951	1508	1333	2649	1726
TBC1D4	1.18393	0.00046586	349	326	579	502
VRK1	1.00674	0.000469285	1550	1845	2357	2438
SCNN1D	1.87466	0.00047111	40	56	109	138
PLPP5	1.04662	0.000477229	3711	3568	6232	4373
PLD5	2.05173	0.000478662	42	39	77	159
FMOD	1.82152	0.000480905	86	44	145	180
TMEM234	1.23959	0.000487629	1470	1141	2828	1533
PDCD5	5.28195	0.000488961	1	1	43	12
TLN2	1.12237	0.000491342	2197	2270	4269	2589
ELF3	1.67802	0.000492646	74	113	153	266
MZT2B	1.31239	0.000496776	1146	772	2217	1157
TMEM147	1.01917	0.000498573	5550	6021	9581	6939
MS4A15	7.24326	0.000498443	0	0	3	36
C12orf54	2.5422	0.000500859	26	22	160	38
MAG	3.26378	0.0005022	5	7	42	39
ARHGEF3	1.30262	0.000501899	1127	1227	2817	1280
THYN1	1.01037	0.000502936	2737	2720	4369	3379
WFDC13	6.28166	0.000504076	1	0	35	20
WASHC2A	1.0377	0.000505461	1992	1840	3158	2391
ZNF768	1.40187	0.000506487	394	228	459	702
STXBP6	1.32794	0.000508645	430	499	1096	548
CYSLTR2	1.95973	0.00051168	50	38	153	89
LRFN4	1.80283	0.000514666	153	68	372	176
C22orf15	2.81691	0.000516702	14	10	35	84
NDUFS7	1.20629	0.000520167	977	641	1539	1103
PAK1IP1	1.13548	0.000523225	3705	3380	6951	4040
EFCAB2	1.0924	0.000524031	731	743	1264	951
MRPS9	1.05683	0.000530963	1091	1142	1868	1405
TPH1	1.58624	0.000533269	89	91	227	154
NDUFB6	1.14337	0.000537345	763	695	1362	911
TMEM176B	5.34095	0.000539357	16	1	155	336
UTP14A	1.22089	0.000541144	1240	1494	2950	1540
FAM92A	1.07505	0.000541103	779	703	1205	997
CCDC115	1.28962	0.000554118	191	192	315	344
FOXO1	1.09172	0.000554396	1816	1719	3221	2095
ZDBF2	1.28917	0.000556182	518	554	1224	624
NOC3L	1.2928	0.000565758	551	480	1174	611
KNL1	1.06924	0.000575184	617	625	865	969
DLGAP5	1.0739	0.000584267	805	769	1032	1300
LRRC4C	1.16336	0.000587005	418	589	709	873
CHI3L1	1.86247	0.000591376	114	106	443	123
ANGPTL1	4.0757	0.000596559	6	0	34	38
SLC16A9	1.42837	0.000596976	122	157	224	303
PIAS4	1.43433	0.00059725	411	205	709	472
TBL3	1.38146	0.00060401	1687	674	2151	2214
NGLY1	1.07412	0.000616667	628	708	1097	883
LRRCC1	1.1753	0.000617131	408	476	583	819
PNPT1	1.33144	0.000617822	321	294	710	383
SP140L	1.33939	0.000619664	384	292	782	428
MND1	1.31102	0.000620638	193	167	336	294
LRFN5	2.05032	0.000627609	37	27	87	100
SPCS2	1.03273	0.000628592	1015	1078	1684	1332
MT-ATP8	6.21114	0.000628448	0	1	22	30
MRPL3	1.07751	0.000629586	1910	1440	2841	2155
PIK3R1	1.14453	0.000630052	541	516	686	958
TIRAP	1.46837	0.000633304	101	110	220	191
TYRP1	1.95435	0.00063461	28	81	146	149
SEMA3D	1.31194	0.000634485	218	338	401	566
CLMN	1.10621	0.000641527	463	434	650	710
NEK5	1.2986	0.000642135	169	222	364	312
GGT7	1.07787	0.000646341	1065	1017	1292	1800
RABEPK	1.08203	0.000649188	3216	3092	5820	3603
TBX5	6.3995	0.000651239	4	0	50	190
SAMD15	2.0097	0.000651687	32	42	79	130
AANAT	3.65941	0.000651563	11	0	38	61
RCOR3	1.11593	0.000655124	783	873	1019	1502
NUBP2	1.66785	0.000656031	136	62	237	209
TAF1B	1.06502	0.000657494	1208	1166	2061	1442
CSK	1.25175	0.000657845	609	353	760	860
PSMC1	1.09414	0.000660795	2579	2104	4284	2780
CEP131	1.16351	0.000663908	444	347	673	578
LMO1	1.60186	0.000663429	140	73	252	206
CCDC57	1.14917	0.000665339	583	520	711	1011
POP1	1.09433	0.000665968	1432	1677	2856	1819
PSMG1	1.14021	0.000668527	2628	2252	4835	2765
SMC6	1.07639	0.000675137	1760	1862	3281	2103
ROM1	1.76269	0.000675742	108	47	201	172
GPATCH4	1.18435	0.000678151	4015	4215	8809	4388
STK33	1.29863	0.000680898	197	180	293	360
TBRG1	1.11447	0.000684733	1150	964	1949	1284
SLC24A1	1.41742	0.000698269	162	176	234	400
CCT6A	1.08472	0.000703273	8820	8461	16269	9599
POLR1E	1.10064	0.000704824	656	545	1011	807
RPL36	1.02456	0.000709052	8208	6924	12757	8981
TALDO1	1.01532	0.000709299	5981	4973	9003	6632
SAPCD2	6.17759	0.00070957	1	0	20	31
PLXNA2	1.04791	0.000717345	3364	3784	4165	6214
SLC7A7	1.37199	0.000720884	187	175	255	404
RALA	1.02092	0.000721839	3178	3077	5285	3667
MRPL1	1.03884	0.000729354	958	898	1508	1181
HSD17B14	1.05694	0.000734112	637	701	889	1068
TPPP2	4.40267	0.000735294	0	5	63	11
JRKL	1.2363	0.000746326	581	529	1200	647
PGBD2	1.54633	0.000748365	145	143	410	184
HOXA10	1.88528	0.000753425	54	79	252	94
AP002495.1	1.62567	0.000755286	112	62	198	182
SORBS3	1.74689	0.000757916	140	52	207	250
USP27X	1.27752	0.000757744	327	275	642	389
XRCC4	1.4107	0.000763294	531	626	1575	595
ANKRD36C	1.10964	0.000764418	469	679	903	836
NOL8	1.04083	0.000768984	1226	1220	2071	1477
SYNE2	1.05684	0.000770064	1437	1780	1949	2748
BRIP1	1.30649	0.000771251	217	162	352	310
ADAMTS14	1.69995	0.000781056	162	208	658	190
MAN1A1	1.03751	0.00078164	639	623	886	938
CLINT1	1.04226	0.000787034	3752	3454	6336	4138
MRPS18A	1.02647	0.000788217	1328	1345	2224	1614
CCDC138	1.24064	0.000795878	205	256	346	419
KCNS3	2.02587	0.000799098	41	25	98	92
BCL7A	1.26293	0.000800528	309	267	382	591
FIP1L1	1.02723	0.000803287	1001	879	1480	1223
AKR1B10	3.63732	0.000803751	2	7	18	60
MRTO4	2.25586	0.000804872	19	23	68	73
IPP	1.0288	0.000805727	807	739	1195	1029
ADAT3	3.7164	0.000810104	5	2	26	39
TET1	1.03689	0.000820665	626	662	875	984
SMCHD1	1.0189	0.000821657	1131	1075	1779	1373
CPS1	1.67822	0.000824873	203	69	294	324
MRPS15	1.1506	0.0008247	4373	3294	7721	4321
KIF23	1.06053	0.000826733	1268	1094	2043	1435
ANP32B	1.3951	0.000831156	180	192	448	242
ZFP69B	1.5073	0.00084721	123	92	258	174
C20orf96	1.13156	0.000846897	470	565	661	931
NR3C1	1.0126	0.000852694	695	789	1074	1032
ENOSF1	1.16639	0.000859679	1103	1281	2455	1316
BBS7	1.03454	0.000860439	1099	1063	1809	1314
PLCB1	1.03341	0.000879693	593	629	934	827
TIPRL	1.0056	0.000884649	4620	4388	7586	5173
ADAMTS20	2.60506	0.000887182	11	14	60	47
PHF5A	1.00097	0.000891169	2366	2253	3798	2722
GZF1	1.31865	0.000903072	489	480	1180	527
SDAD1	1.10226	0.000903346	2710	2551	5088	2886
ACKR1	1.55539	0.000911849	148	113	176	364
MUM1	1.08507	0.000925195	464	422	623	701
EPHA6	2.45818	0.000934736	14	16	61	55
KANK4	1.08309	0.000937817	1264	1593	1676	2570
ISL1	1.2134	0.000945521	1085	1085	1171	2363
HOXD11	4.41748	0.000948488	4	0	45	16
EHBP1	1.04282	0.000950284	637	659	842	1036
RPL17	1.45955	0.000953254	189	143	428	218
SBSN	4.71696	0.000954252	2	1	48	8
MTHFD2L	1.46137	0.000969507	144	116	319	187
PTPN2	1.04539	0.000975212	1357	1257	2275	1532
PLP2	1.09125	0.00098212	1500	1255	2555	1592
MAGIX	1.73425	0.000982785	46	57	130	111
CUL1	1.19788	0.00100016	386	367	757	462
IRAK1	1.44166	0.00100273	187	134	397	220
KIF21B	1.11266	0.00100586	426	348	618	563
PBDC1	1.06238	0.00100851	2590	2455	4637	2799
FHL3	1.26081	0.00101152	230	207	438	301
PAK4	1.00985	0.00102022	1624	1715	1973	2753
LTN1	1.01184	0.00102246	986	1052	1656	1239
ZNF503	1.22976	0.00102743	230	269	489	335
GABPB2	1.01867	0.00103132	665	861	1097	1075
ZNF236	1.01574	0.00103237	769	687	1107	969
GAS1	1.31439	0.00103614	306	227	346	588
RARA	1.53032	0.00103718	230	94	344	320
CARD19	1.058	0.00104393	1367	1585	2649	1680
FAAP24	1.20864	0.00104979	269	214	424	364
COMMD1	1.08591	0.00105068	577	615	1056	727
TAPBPL	1.18771	0.00105462	212	245	363	369
ACPP	1.85974	0.00105577	30	76	139	130
UNKL	1.06938	0.00106528	403	433	654	581
AMACR	3.45878	0.00108151	13	0	48	54
GOLGA1	1.02341	0.00108383	868	911	1470	1078
AJM1	2.20151	0.00108617	30	17	87	66
SRBD1	1.0349	0.00108716	679	585	980	847
SGTB	1.34906	0.00109086	345	272	754	358
PRKAR1B	1.03872	0.0010932	523	514	800	701
TLE6	1.53071	0.00109408	124	79	171	243
CCNL1	1.07331	0.00109677	744	653	1220	855
PLAC9	1.90208	0.00110504	31	44	111	86
MTIF2	1.10038	0.00111507	1034	1079	2015	1180
DHRS4	1.25001	0.00113877	710	366	1011	803
PCDH17	1.31403	0.00113969	847	806	835	2051
POLR3B	1.09195	0.00114193	521	436	812	628
TCTN1	1.06013	0.00114176	1163	842	1659	1296
FSCN1	1.25879	0.0011489	5677	2631	8582	5535
LRRC38	3.70825	0.00115337	6	1	36	29
CCDC97	1.33214	0.00115567	364	232	682	381
GNG5	1.01799	0.00116405	8093	7807	14045	8675
PPIB	1.00475	0.00117439	3516	3221	5745	3796
SPTY2D1	1.30873	0.00117579	321	240	352	627
SCML1	1.00236	0.00117908	698	710	1081	906
SNX8	1.06866	0.00117844	1583	1388	2726	1675
GRIA4	3.53197	0.00118092	51	86	183	922
PMFBP1	1.67014	0.00119671	80	49	131	159
DEPTOR	2.57954	0.00120086	46	5	76	141
LINGO1	1.29688	0.00120887	174	143	253	296
FXYD7	1.6244	0.00121598	59	67	120	153
CDC25A	1.0573	0.00121843	467	484	627	765
FAM122A	1.14735	0.00122597	410	347	700	484
ERP27	1.01359	0.00123873	1043	801	1273	1354
CBX4	1.56377	0.00124259	83	116	273	141
IGDCC3	1.20662	0.00125477	7941	6577	7307	16259
RPL14	1.02398	0.00125446	10546	9406	17792	10859
MCOLN2	2.88471	0.0012632	7	10	31	57
SH2D4A	1.18006	0.00128092	1695	1481	3445	1642
DIS3L	1.31548	0.00128591	151	136	225	278
HSD17B6	1.64596	0.00129999	111	106	352	128
ADAMTS2	1.04512	0.00132405	493	441	720	639
FAM50A	2.10248	0.00134149	21	34	105	61
GTPBP8	1.07069	0.00135432	509	596	959	675
ZNF770	3.02377	0.00137298	204	148	1633	398
CACYBP	1.06256	0.0013823	3360	2861	5816	3365
TCEA1	1.0853	0.00138343	2227	2497	4580	2486
RBFA	1.05466	0.0013998	427	452	714	572
RGPD2	1.32325	0.00141427	202	265	286	533
TWIST2	2.2875	0.00142463	13	25	65	65
U2AF1	1.12653	0.0014311	312	419	641	481
GNAI1	1.05595	0.00146182	1515	1059	2198	1587
METTL1	1.06588	0.00148141	1112	1213	2158	1273
TOR1A	1.04513	0.00148282	1452	1363	2548	1552
NIP7	1.11348	0.00148592	311	326	552	419
DHRS3	2.70293	0.00148555	3371	2412	20909	5801
KCNJ8	1.25027	0.00149841	169	168	318	247
CCDC130	1.12121	0.00152944	1511	878	2107	1574
BDKRB2	2.73791	0.00153006	12	8	33	61
GPATCH1	1.06846	0.00156391	504	547	924	629
CRACR2B	2.09293	0.00157225	21	27	79	65
HSPH1	1.023	0.00157609	2615	2795	4860	2891
CELA2A	3.14042	0.00159411	3	9	36	38
HOXA4	3.31672	0.00160376	3	8	59	18
KIF18B	2.03431	0.00160665	46	26	63	145
TRHDE	2.17925	0.00161477	28	16	78	63
CTU2	1.30588	0.00163153	811	418	1412	745
PDPN	1.92754	0.00163495	31	31	79	87
COPB2	1.0738	0.00164826	8187	7678	15533	8052
LNPEP	1.22134	0.0016491	263	215	316	469
CHCHD6	1.0007	0.0016539	2076	1986	3509	2226
RBP1	1.07637	0.00166023	2385	2044	4260	2340
SFI1	1.11615	0.00166242	387	343	464	650
MED19	1.05936	0.00166627	2029	2371	4147	2314
BATF3	1.63384	0.00166798	227	268	876	209
NAE1	1.0932	0.00169413	2703	2534	5218	2673
MACROD2	2.08057	0.00175618	46	16	88	98
SYT4	3.03287	0.00175709	8	5	28	47
MRPL46	1.11959	0.00176624	235	288	419	380
SMOC2	1.10337	0.0017692	387	463	518	764
BTN3A2	1.10621	0.00177597	336	272	440	483
STAT1	1.15544	0.00181092	447	443	901	498
DSC3	1.22866	0.0018203	465	746	676	1309
MRPL54	1.1362	0.00185919	1218	986	2269	1157
PIGBOS1	1.13403	0.00186033	415	305	649	468
SLC16A13	1.61115	0.0018725	134	69	146	292
CCND1	1.37448	0.00187331	7486	6021	19245	5567
LSM7	2.67887	0.0018981	1587	458	5621	3709
ZADH2	1.04294	0.00191478	1109	1046	1962	1172
CEP170	1.29535	0.00191687	336	325	799	347
DYNC1LI1	1.20181	0.00193115	214	217	420	279
SULT1A2	1.41722	0.00195348	94	101	151	215
C5orf30	1.07441	0.00196253	522	565	630	978
CLN6	1.08751	0.00196907	352	433	491	680
L3MBTL3	1.19086	0.00198182	260	222	468	309
SKA3	1.04939	0.00199234	323	349	517	462
ASB8	1.17122	0.00199693	202	187	293	324
MVK	1.13646	0.00203102	233	341	406	479
C1orf35	2.32449	0.00203554	32	9	83	63
MRPS11	1.00043	0.0020579	1818	1506	2851	1847
AKAP8L	1.29397	0.00205929	1439	1771	4137	1415
SUMF1	1.21955	0.00208615	191	157	316	256
CHST2	1.34264	0.00209984	243	207	558	249
UCHL3	1.03917	0.00210155	2050	1755	3514	2011
FYB2	2.78338	0.00214076	9	9	26	61
ALOX15	1.18696	0.0021693	165	195	270	306
APOPT1	1.18676	0.00217268	269	245	513	313
DUT	1.0104	0.00217542	409	432	645	548
ESCO2	1.23447	0.00217612	197	147	262	309
ICK	1.05271	0.00218211	510	512	903	592
YWHAG	3.66817	0.00218413	4	2	34	20
ADAMTS18	1.33787	0.00219259	1238	1061	1005	3077
TMEM132C	1.95763	0.00223233	31	59	63	181
ARID5A	1.5742	0.00223232	252	162	679	196
HOXB2	1.33895	0.00226089	127	185	352	203
RBP4	1.82605	0.0022936	55	75	252	73
PHOSPHO2	1.30932	0.00230893	115	122	183	230
ZNF721	1.76072	0.00234002	39	39	86	100
PTBP1	1.24035	0.00235014	486	233	558	645
SORD	1.02391	0.00235404	556	521	643	898
TSNARE1	2.12062	0.00237638	33	15	86	62
NMNAT3	1.46093	0.00240868	82	77	130	178
RNF126	3.23978	0.00242399	173	41	1016	428
NOD1	1.09147	0.00244206	237	257	394	347
NDUFS6	1.09879	0.00246331	2026	1427	3415	1821
CTDSP1	1.70705	0.00246511	59	57	82	184
BCCIP	1.01759	0.00249803	3299	3464	6266	3392
HNRNPAB	1.04072	0.00251362	385	326	556	476
TTYH2	1.50154	0.00255593	180	70	235	267
RAB3C	2.46839	0.00256351	21	7	61	49
TTC32	1.13489	0.00262199	191	199	315	288
IRX1	3.79911	0.00268372	3	2	17	32
TFAP2B	6.67989	0.00271046	9	0	144	514
GBGT1	1.4584	0.00272263	70	77	128	156
LARGE2	2.15913	0.00272468	24	16	51	75
WDR31	1.13119	0.00275421	222	202	296	358
BMP5	1.53289	0.00276564	76	77	108	203
PRSS48	2.82632	0.00277444	9	6	30	45
JUN	1.14136	0.00280379	840	720	1656	777
FAM13C	1.73572	0.00283585	75	35	164	96
SGO1	1.48143	0.00285914	79	80	117	195
METTL7A	1.23506	0.00286169	153	226	380	247
PTPRK	2.24188	0.00291413	9	78	88	197
CRYL1	1.30297	0.00291692	122	110	174	229
ERLIN2	1.11786	0.00292945	361	244	418	509
BRSK2	2.25083	0.00296117	23	12	70	48
KLHDC7B	3.54969	0.00297948	0	9	22	51
IL1B	4.07815	0.00298499	3	1	37	11
MYL4	1.0144	0.00300534	1531	1253	2510	1465
ABCA7	1.09006	0.00302284	348	263	521	398
SGF29	1.00441	0.00305745	828	687	1300	847
NUBP1	1.02604	0.00309243	324	322	510	417
ZNF620	1.05408	0.00313258	386	358	445	642
ETV2	1.87303	0.00314641	48	24	115	72
VIP	3.33841	0.00314889	14	2	109	7
TRMO	1.08317	0.00320796	587	411	912	584
MACROD1	1.43053	0.00323088	269	94	358	337
PSMB10	1.50679	0.0032842	76	64	174	107
2021-09-01	1.08765	0.00329114	394	729	947	726
NEURL2	2.24076	0.00330795	20	15	78	39
TMEM126A	1.00324	0.00332292	1429	1356	2528	1413
HOXA9	1.86792	0.00333362	63	35	191	63
LINS1	1.07622	0.00335632	296	313	543	362
TMEM56	1.41625	0.00340983	65	93	146	150
USP30	1.51537	0.00343037	85	51	146	129
BLK	4.8011	0.00343038	0	2	24	15
ARMCX6	1.16661	0.00348942	178	251	404	273
GLYCTK	1.32125	0.00351338	130	124	288	160
MPG	1.19666	0.00354585	219	242	486	259
CPZ	3.92675	0.00354555	5	0	16	38
TUBB2B	1.34097	0.00356423	631	212	874	645
PRSS16	1.22281	0.00357879	132	146	196	260
ZNF749	1.63047	0.00362048	52	41	93	110
RNF112	1.4403	0.00362236	67	74	121	148
SLC47A1	4.46042	0.00363679	19	1	171	144
PLVAP	2.11942	0.00363833	29	15	48	87
GBP4	1.88448	0.00369129	38	23	66	93
RNASEH2B	1.05947	0.0038103	363	329	619	399
DPM1	1.05577	0.00388641	312	324	561	371
PSAPL1	4.79891	0.00392899	1	1	6	33
METTL24	2.38541	0.00399742	14	11	37	55
FOXM1	1.66111	0.00400023	101	34	141	162
MRPL9	1.02048	0.00407907	2130	1722	3635	1891
CISH	1.09485	0.00411667	199	319	400	376
ZDHHC11B	1.77202	0.00412358	47	58	192	61
STK19	3.41053	0.00428629	3	7	6	68
TUBGCP5	1.0627	0.00429076	338	318	596	371
TEK	1.36566	0.00434025	181	108	353	175
TMEM160	1.96623	0.0043973	29	20	54	81
ZNF528	4.63713	0.00449605	1	1	15	20
KIF27	1.18901	0.00450389	167	128	262	213
GATC	1.06643	0.00455519	682	796	1468	714
CMIP	1.31492	0.00456031	299	120	331	408
GLRX	1.12332	0.00459739	694	697	1500	640
ANK3	1.0105	0.00463418	1846	1662	1694	3275
ABAT	1.20672	0.00465182	393	354	868	351
SWI5	1.32106	0.00465882	102	89	141	195
PID1	1.17283	0.00470475	306	230	562	293
ITM2A	1.01628	0.00470789	345	303	535	390
GADD45B	1.12835	0.00476566	316	281	604	318
ACP1	1.81649	0.00481927	30	30	89	60
ASGR1	1.077	0.00484366	183	206	273	304
FLT3LG	1.98462	0.00486023	23	20	64	56
MCOLN3	1.12863	0.00487425	166	208	242	332
CTDSPL2	1.09794	0.00488694	242	186	287	359
ALKBH8	1.01487	0.004926	243	271	392	339
MORN1	1.00824	0.00493803	256	265	393	345
TM9SF1	1.15029	0.00495976	237	183	407	252
IGF1	2.02042	0.00499802	45	17	130	49
KCNN2	1.45651	0.00503479	107	57	191	128
PTPN12	1.06353	0.00510764	242	192	323	317
GPR183	2.23372	0.00512273	13	16	56	40
SVIP	1.65269	0.00512905	43	49	70	133
NECAP1	1.1884	0.00518833	140	130	250	184
PCLO	1.04343	0.00521461	202	272	336	350
PCDHGB5	4.66245	0.0052495	2	0	21	15
LACTB2	1.12403	0.00526797	165	208	337	235
RAD18	1.02654	0.00527801	420	502	840	483
NCR3LG1	1.27712	0.00531731	99	103	202	143
MT1F	1.58145	0.00533676	75	61	208	80
FGF10	3.29466	0.0054434	10	0	32	38
LYAR	1.00837	0.005481	479	602	969	562
AQP10	1.96482	0.00549302	20	23	55	63
APOOL	1.18844	0.00556878	110	174	230	224
SCRIB	1.43253	0.00563035	89	58	115	165
TBCE	1.64899	0.00563643	41	77	184	76
ATP5F1D	1.12455	0.00566141	626	453	1145	521
BICDL1	1.14792	0.00573014	134	155	201	249
ZNF713	1.23188	0.00585445	124	95	183	180
SLC22A2	2.0678	0.00587075	38	17	126	38
AQP3	1.67852	0.00590468	69	30	141	84
LRFN1	1.58258	0.00590832	36	69	91	129
ZNF582	1.76458	0.00603484	66	23	133	82
TRIT1	1.00141	0.00605543	389	439	728	440
SLC22A3	1.37041	0.00608174	262	252	736	204
ANAPC2	1.30297	0.00608057	167	82	208	227
YDJC	1.96473	0.00617447	31	16	78	52
LRRC23	1.26635	0.00621855	106	96	142	200
C17orf100	1.3258	0.00621825	159	92	287	159
FAM218A	1.26345	0.00633224	92	89	151	155
ACAD8	2.58918	0.00648209	7	10	47	25
PRADC1	1.36452	0.00652867	88	111	245	116
IRAK1BP1	1.04992	0.00657906	182	195	257	292
ZNF141	1.28149	0.00661942	90	81	151	142
C19orf48	1.16625	0.00665013	165	115	235	209
NDUFV2	1.05869	0.00672626	200	169	272	270
ACTBL2	1.79533	0.00686099	18	55	94	83
RAB40A	1.8738	0.00687174	32	19	57	75
BANF1	1.49231	0.00692002	50	58	130	84
RPUSD3	1.12928	0.00697353	181	176	345	206
KHDRBS2	1.86547	0.00698393	24	26	50	78
FSBP	2.11987	0.0070111	18	14	41	57
CAMKMT	1.35314	0.00704101	83	65	151	116
IMP3	1.07656	0.00710086	616	560	1221	532
LAMA2	1.26446	0.00713217	247	252	631	216
FOXA1	5.45108	0.00715281	1	0	22	9
CCDC33	3.54495	0.00720138	2	3	21	20
INPP5J	1.53225	0.0072231	55	39	99	93
FANCC	1.01671	0.00725457	506	295	537	609
LRRIQ1	1.31699	0.00730681	79	77	157	117
YTHDC1	1.17166	0.00732826	189	156	196	351
SEC61B	1.11121	0.00733476	130	151	223	204
COL6A6	1.52493	0.00736414	125	58	107	265
PTPMT1	1.07286	0.00738287	178	157	268	229
CENPP	1.29827	0.0073878	75	174	201	227
ATP2A3	2.53605	0.00739146	13	5	39	35
COL24A1	1.62698	0.00756896	46	42	130	62
CCDC171	1.088	0.0076678	165	151	213	260
ACKR3	1.33447	0.00775501	233	84	245	322
CDCA7L	1.20639	0.00777324	107	175	279	178
MYH3	1.16425	0.00777939	115	120	207	164
RAB42	1.1194	0.00782704	199	152	326	213
ISCA2	1.62682	0.00788202	38	41	109	63
SCAND1	1.84239	0.00797061	43	23	121	47
ADAMTSL5	1.05458	0.00799411	169	190	297	228
TOP1	1.02804	0.00800459	227	185	323	270
TEPP	1.32314	0.00819321	74	70	141	113
PLSCR5	2.23279	0.00820891	19	9	35	58
ALOX5AP	3.31009	0.0082335	157	107	1646	215
FAIM2	1.07416	0.0082837	152	165	262	208
KCTD8	2.28228	0.0083478	6	22	43	52
FAM206A	1.00448	0.00850206	186	208	277	279
MT-ND5	2.3167	0.00850157	4	30	72	46
TMCC3	1.07163	0.00859338	170	225	352	232
SNAPC2	1.41299	0.00861587	111	60	213	110
DUSP9	2.90675	0.00865176	6	4	31	22
LMNB2	1.06609	0.00884583	969	533	771	1450
COMMD6	1.88952	0.00885846	33	15	66	60
ERICH5	1.03009	0.00897634	209	188	330	242
TBC1D16	1.09677	0.00899097	137	134	192	216
NEXMIF	2.11616	0.0090707	9	24	48	52
TMEM218	2.88361	0.00909259	5	5	29	23
ARHGAP6	1.76104	0.00910221	36	26	50	98
ISL2	3.91573	0.00928888	3	1	39	4
SCTR	3.75056	0.00938795	3	1	11	27
HOXA3	1.58591	0.0095783	41	55	142	61
RAB38	1.20559	0.00961514	99	91	172	137
ZNF23	2.25505	0.00964965	17	9	59	29
ZNF718	2.71033	0.0098471	17	1	38	46
MAP7D2	1.3552	0.0100417	63	78	160	94
F12	1.5621	0.0100517	61	51	172	62
CD83	1.1497	0.0101836	102	150	170	222
PPFIA3	1.48208	0.0102166	53	42	79	108
CLDND2	1.77064	0.0102252	24	26	57	63
TNNI3	1.75592	0.010241	65	22	62	146
HPSE	2.26373	0.0103514	24	5	46	53
GGACT	1.26442	0.0103712	107	82	202	119
JMJD8	1.22884	0.0106311	112	81	134	185
XYLB	1.13812	0.0107008	113	119	154	205
STK32C	1.02649	0.0107079	214	176	327	234
SPIN2A	2.89524	0.0108536	3	7	19	33
AMN1	2.08326	0.0108631	42	6	74	71
SLC39A4	2.26711	0.0109448	12	15	21	70
LAMA3	2.15384	0.0110866	22	9	66	32
LONRF2	1.78267	0.0112587	24	32	43	92
FGF11	2.60206	0.0113672	9	5	24	36
SH3BP5	1.45739	0.0114149	66	44	79	134
NEMP2	1.17081	0.0114388	164	92	219	189
NFKBIZ	1.08727	0.0115466	1419	1509	3329	1066
P3H4	1.30748	0.0116093	68	61	112	113
MAP3K14	1.26059	0.0116207	67	79	126	120
TMEM191C	1.74985	0.0119385	36	19	74	57
FGF18	1.64883	0.0123187	29	36	53	90
MERTK	1.25082	0.0123357	87	66	132	125
ROPN1L	2.25378	0.0123768	11	11	46	28
APOA2	2.43457	0.0125261	15	4	41	32
ADAP1	2.14769	0.0125498	13	12	36	42
GSTA2	2.94875	0.0125492	8	2	41	14
HOMER2	1.1221	0.0125905	137	100	169	195
RAB37	3.31948	0.0126177	3	3	9	33
USP51	1.03037	0.0129144	266	280	264	519
CENPV	1.14872	0.0129181	101	98	174	137
MCM2	1.00419	0.013229	227	163	250	302
MRPL34	1.21902	0.0132752	69	93	142	123
TNFRSF13C	1.40932	0.0133048	48	79	81	155
NFXL1	1.2119	0.0133496	99	77	168	120
LRRC4B	1.66087	0.0133765	31	26	58	69
PHRF1	1.28472	0.0133972	97	59	155	114
MCTP2	1.58118	0.0134927	31	35	76	63
PTPRT	1.9595	0.0138233	24	13	66	36
RARRES1	1.97629	0.0139626	23	19	91	26
SPATA1	2.00177	0.014012	12	20	53	37
ITPKA	1.9172	0.0140511	30	17	95	31
SCAF8	1.26211	0.0142165	215	103	380	162
CATSPER3	2.56701	0.0142351	3	12	28	34
RAB7B	1.2432	0.0144628	381	333	962	235
SINHCAF	1.05529	0.0145715	254	202	226	441
CHRDL2	2.41616	0.0149463	6	14	58	17
SMAD9	1.10102	0.0150423	235	116	246	287
SOCS7	1.09461	0.0151793	167	109	242	175
ANKRD35	2.87719	0.0154227	8	2	15	37
REM2	1.87106	0.015871	29	13	67	42
IL1R1	1.01368	0.0160244	156	143	186	239
NNMT	1.56796	0.0160702	80	69	262	51
C1orf21	1.11656	0.0161315	106	100	182	133
ELAVL3	3.39872	0.0162189	6	0	13	32
C1GALT1	1.0475	0.0163178	229	203	426	205
KRT81	1.82293	0.0163333	57	32	195	29
SPPL2B	1.25618	0.0163901	81	64	98	146
DCXR	2.50117	0.0165097	9	5	26	30
C1QTNF2	1.33055	0.0165405	51	58	110	83
PCSK1N	3.16072	0.0166523	8	0	21	30
IFNGR2	3.31912	0.0167193	6	2	55	2
RARRES3	1.89419	0.0167695	12	26	58	41
PIH1D2	1.11713	0.017151	97	94	161	131
CALR	1.09019	0.017181	193	209	425	179
FOSB	1.6841	0.0172635	41	107	287	47
ZBED9	2.03175	0.0173001	9	20	41	42
SOX8	1.2405	0.0173211	56	103	118	145
C8orf48	1.1076	0.0174214	104	112	198	130
ETAA1	1.10235	0.0174549	150	173	335	154
REEP1	1.1516	0.0175521	89	79	128	135
TSPAN7	1.39944	0.0176574	34	70	92	100
COL23A1	1.50395	0.0177429	41	31	65	79
BHLHB9	1.31597	0.0177688	48	91	94	148
ZNF771	1.03771	0.0179971	231	213	440	204
CYP2A6	1.89609	0.0179955	22	13	40	52
HOXB8	1.72788	0.018179	17	42	93	44
SPA17	1.06254	0.0182288	123	118	210	145
FAM86B2	1.9564	0.0182697	16	14	37	45
CSF3R	1.14267	0.0183011	124	80	138	180
TMEM128	2.50857	0.0186493	6	7	24	28
SYCE2	1.62699	0.0187289	45	19	63	77
KLK6	1.93312	0.0189787	34	10	35	84
JAM2	1.0195	0.0194313	261	214	463	218
MGAT5	1.36114	0.0194711	55	42	100	76
CDHR4	1.89933	0.0198899	12	22	52	37
SNRNP70	1.14212	0.020005	397	158	286	581
ZCCHC10	1.05982	0.0203693	128	127	235	140
FIBIN	1.11477	0.0205902	120	91	127	195
CELA2B	1.74513	0.0205971	18	24	56	43
CHRM3	1.04064	0.0208276	241	161	201	382
BUD31	1.0058	0.0210922	158	129	239	168
SLC5A9	2.10593	0.0211831	16	8	29	44
TMEM141	3.0984	0.0214073	2	4	16	20
C19orf57	1.18744	0.0215779	97	77	100	179
CCDC144NL	1.76798	0.0217534	15	26	56	42
P2RX5-TAX1BP3	1.24575	0.0217506	49	96	136	105
RIMBP2	1.68767	0.0219479	34	16	53	61
FGL2	2.66057	0.0222695	1	16	62	13
RBFOX1	2.78055	0.0224164	10	1	38	16
SF3A2	1.12874	0.0224799	108	77	168	118
KCND2	2.35673	0.022761	7	8	24	30
GAL	1.94457	0.0230212	31	28	146	15
PNMA3	2.03925	0.0233454	27	7	27	72
DNAJC4	1.09595	0.0235685	105	89	119	173
ALOXE3	2.52781	0.0236611	8	4	28	21
CYBA	1.18759	0.0238267	166	63	175	195
WASF1	1.61886	0.0240494	44	21	44	97
NDUFA4L2	2.9479	0.0242184	4	3	12	26
FAM124A	1.42272	0.0245926	42	32	71	69
CFAP221	1.74931	0.0248586	21	27	29	84
HLX	1.00445	0.025003	190	144	172	300
STARD10	1.191	0.0251462	249	73	283	240
B3GNT5	1.06225	0.0251644	84	104	144	132
CCDC15	1.08362	0.0253461	88	87	119	142
GABRB2	1.6977	0.0258899	29	18	72	36
C5orf49	2.13539	0.0265141	16	9	62	16
C15orf65	1.71383	0.0266121	21	27	81	30
RHPN1	1.43038	0.0269441	47	39	50	113
SLC24A3	1.42905	0.0270645	38	32	74	59
EYA1	1.3912	0.0270766	110	86	61	300
CRB3	1.29444	0.0271956	36	97	121	107
TMEM200B	1.09166	0.0275951	120	85	118	190
GLYATL1	1.84438	0.0276065	7	37	54	56
RNF180	1.49361	0.0276511	29	31	67	52
ALK	2.11738	0.0276724	12	13	15	61
OSTC	2.01442	0.0277355	10	14	27	41
TESK1	1.35946	0.0277878	94	30	113	113
FCRLB	2.30001	0.0280699	2	19	43	29
C14orf39	1.03358	0.028374	92	103	155	126
IGFLR1	1.22307	0.0285044	100	51	155	95
ZNF221	1.05821	0.028751	82	112	164	120
FGD3	1.32604	0.0288196	39	63	65	114
RPF1	1.01011	0.0291423	129	135	241	134
TRIM63	3.35612	0.0292438	3	1	14	15
FOXS1	2.37845	0.0296651	4	10	30	21
TMEM70	2.07225	0.0300046	8	13	34	28
DUSP15	2.78288	0.0302386	8	1	16	28
GLTP	2.02195	0.0306445	12	10	32	31
AC090517.4	1.51569	0.030723	31	24	59	52
NQO2	1.28793	0.0308348	51	42	70	90
MAPK15	2.42066	0.031244	8	8	8	52
H1FX	1.58612	0.0312749	61	17	51	115
TOP3B	2.75201	0.0313145	5	3	14	24
HPSE2	2.69262	0.0313169	13	0	25	35
CCDC173	1.70826	0.0315371	12	30	50	46
BST1	1.60367	0.0315586	45	24	116	33
AARD	1.32422	0.0317156	32	58	85	73
COMMD3	1.68596	0.0319556	22	20	32	63
AC008764.1	1.26884	0.0320341	82	58	173	66
TXN2	1.47493	0.0321168	50	24	96	50
KRT14	1.35038	0.0326672	70	30	109	72
PCDHA13	2.96974	0.032694	2	4	20	13
LPO	3.59522	0.0327589	27	1	108	134
OST4	1.45514	0.0339016	61	34	142	43
SPACA3	1.89889	0.0339975	13	14	46	25
PLPP7	1.18462	0.0341659	75	47	98	98
FLRT1	1.75612	0.034337	9	43	38	84
ACACA	1.30653	0.0344873	53	34	72	80
IQCK	1.77722	0.0347196	14	18	33	44
GUK1	1.34094	0.0347641	41	52	115	51
MIB2	1.18382	0.034852	91	50	138	89
PCSK4	1.58774	0.0348744	52	21	36	119
RAB33A	1.25462	0.035457	64	42	111	68
GRHL2	1.20262	0.0363249	128	277	127	522
CALCRL	1.75874	0.0366347	15	20	27	56
POU3F2	1.67443	0.0369303	30	12	45	50
PAQR6	1.50557	0.0370702	37	25	38	86
DGKG	2.22973	0.0370987	8	8	38	15
ECI2	1.35957	0.0373502	47	29	80	58
GALNT12	1.13199	0.0374529	50	90	108	107
FLT4	1.12943	0.0376579	74	61	84	124
OPLAH	1.27367	0.037864	70	35	108	72
KCNE3	2.47941	0.0382583	5	6	12	31
SSTR3	3.21024	0.0383128	5	0	16	17
ELOVL2	2.03257	0.0388269	289	240	1259	275
CHMP4C	1.59158	0.0389219	22	26	71	31
FSTL3	2.40391	0.0395547	9	3	20	25
S1PR5	1.42847	0.0397174	61	56	187	36
SLC22A4	1.01022	0.0397181	97	81	139	114
MRPL40	1.57292	0.0398035	20	23	47	43
RNF125	1.80962	0.0410118	34	6	60	40
LRFN3	1.25863	0.0420877	52	35	71	76
PKIG	1.2636	0.0424267	62	35	101	64
CIDEA	2.87885	0.0433279	2	4	20	11
UNC5D	1.20719	0.0435199	88	117	68	263
ENTPD3	1.65257	0.0437299	13	26	52	34
SMPDL3B	1.02141	0.0441303	67	113	118	138
MYL3	1.78642	0.04414	13	15	39	29
TNFRSF9	2.05785	0.0441908	288	215	1231	255
PRC1	1.30491	0.0442448	30	45	62	68
IGF2	1.77075	0.0450144	46	5	49	75
IQCJ-SCHIP1	2.73593	0.0450413	5	2	15	18
AC068896.1	2.21997	0.0460749	13	4	13	43
PYCARD	1.08481	0.0466611	85	63	140	82
FAM198A	3.36387	0.0468654	3	1	2	27
MYBPH	2.90396	0.0480618	5	1	23	9
PET117	1.03558	0.0481278	77	71	124	90
GABRB1	1.41974	0.0482957	58	30	37	129
C1orf210	1.00648	0.0483528	128	83	110	189
ZNRD1	3.64354	0.0483895	37	10	16	399
DAND5	1.26787	0.0483973	37	42	81	53
HSPE1	1.49828	0.0485041	32	17	53	45
OR8S1	1.91342	0.0487903	409	716	2429	554
EPHA3	1.181	0.0489688	54	41	76	76
ZGPAT	1.15079	0.048965	119	42	142	112
MBLAC2	1.09149	0.0490628	58	72	119	76
PTHLH	2.05831	0.0493617	324	354	1679	318
KIF4B	2.69851	0.0495755	3	4	21	11
