# Supplementary material for: Single-cell profiling of lncRNAs in human germ cells and molecular analysis reveals transcriptional regulation of LNC1845 on LHX8
Source: eLife. 2023 Jan 5;12:e78421. doi: 10.7554/eLife.78421 (PMC9859043; doi:10.7554/eLife.78421)
Supplement: Supplementary file 10. [file elife-78421-supp10.xlsx]

## Sheet: qPCR primer list
name	sequence
LNC10307 Q F	TGTTCACTGTAAGGGCAGACC
LNC10307 Q R	AGGACCCTTGGCCCTGATAC
LNC15266 Q F	AGAGCCCCTTCGGGATTTGG
LNC15266 Q R	CGTCATCCAGAGACAAGAGCC
LNC1683 Q F	CCGAGGGGAAGAATGGAGC
LNC1683 Q R	CTGGCCTGTCTCTGGCTTC
LNC1845 Q F	TGCCCTGTTGAACTTTAGCCA
LNC1845 Q R	AGTTCCTCCCACCCAACACT
LNC20743 Q F	AGGGCCACCCACTCTATGTT
LNC20743 Q R	GGTGACACTTGTGGGGCATT
LNC22622 Q F	TGGTGGCAGACATGTCCAAG
LNC22622 Q R	GCCATTACATCGCATTACCACC
LNC23719 Q F	AGGCTTGTGTATCCAGGAATGTT
LNC23719 Q R	AAATTACAGTCAGCCTACCAGCA
LNC3027 Q F	AGAAGGAACAAACTCCAGTGCG
LNC3027 Q R	TCTGGGTTGCCAAAACGTGTCT
LNC31105 Q F	AGCCTTGGAGTCAGAACACC
LNC31105 Q R	TGGCAGGCTGGATGGGATAA
LNC32804 Q F	CTAAGGAGGTGTGAACCGGC
LNC32804 Q R	ATTCACAGGTGCAGTCCCAC
LNC32112 Q F	TTCCGAGGCTCAGTTGTCTG
LNC32112 Q R	CAGATGCAAACTTGCCGGAG
LNC3346 Q F	CAGCTTTTGGAACATCGTCTAGG
LNC3346 Q R	CAACCCACTGTCTTCTCTCCC
LNC39220 Q F	GCAGCTCCGCGAGTGG
LNC39220 Q R	ACAAAGATCGGCCTAGCTGC
LNC41646 Q F	CTAAATTGTGCACCCCTGGTC
LNC41646 Q R	TGCACTTGTGCTCCTGTTGT
LNC48536 Q F	GCCAGAGTGTGTCCAGTGAG
LNC48536 Q R	TGCCTTGTCTCCCAAGAAGC
LNC8015 Q F	TATCCCGCGTGTGAAGGGAT
LNC8015 Q R	GGCAAAGCTGAAGAGCAGACA
LHX8(F1) Q F	TCGCAGAACTTGGCTTTCCG
LHX8(F1) Q R	TGTGGGCCAAGACTGAGGTT
LHX8(F2) Q F	TTGCACTCCCTCCCCAAAAG
LHX8(F2) Q R	GCACTCCTCTGACATGAGCC
LHX8(F3) Q F	GAATGACCTATGCTGGCATGT
LHX8(F3) Q R	ACCCAGTCAGTAGAATGGATGTG
FOXP3 Q F	GAAGGACAGCACCCTTTCGG
FOXP3 Q R	CCTGGCAGTGCTTGAGGAAG
TFAP2A Q F	AGGTCAATCTCCCTACACGAG
TFAP2A Q R	GGAGTAAGGATCTTGCGACTGG
XIST Q F	CGCAGACAACCCGTCTTTTG
XIST Q R	CAGCAAAAAGCGCAGTAGGG
TMCO1 Q F	TTTCGCTTCACTTTTCCTGGC
TMCO1 Q R	TTGTACTTGTCTGTCCTTCGTCT
MPP5 Q F	CCGAGGCGTGGAGAATAAGA
MPP5 Q R	CCTATTATGCAAACTGGAAAAGCCT
FBXO3 Q R	TGCAGAGGGCCGAAACAAAA
FBXO3 Q R	ATGATGGGGAAGCCACCTGA
DAZL Q F	GACTAATCCAAACACTGAAACTTAT
DAZL Q R	TACAGTGGTAGTTAACAGCTGAATA
BLIMP1 Q F	ACATGACCGGCTACAAGACC
BLIMP1 Q R	GGCATTCATGTGGCTTTTCT
BMPR2 Q F	ATGGCAGCAGTATACAGATAGGTG
BMPR2 Q R	TCAGTGGAGATGACCCAGGTG
IL13RA2 Q F	ATGGCTTTCGTTTGCTTGGCT
IL13RA2 Q R	GATCCAGAGACAGTGGGGGTT
NANOS3 Q F	GGACTACGTGTGTCCCCAGT
NANOS3 Q R	TAGGTGGACATGGAGGGAGA
SYCP3 Q F	TATTCCAGGAAATCTGGGAAGCC
SYCP3 Q R	GAGCCTTGTTAATGTCAACTCCA
GAPDH Q F	TGTTGCCATCAATGACCCCTT
GAPDH Q R	CTCCACGACGTACTCAGCG

## Sheet: short hairpin RNAs
name	targeting sequence
shLNC1845-1	GCTTGATGGCTAAGCTTAT
shLNC1845-2	TGGCAATTTCTCATGATAT
shLNC15266-1	GTCTCGACACTTGCAATAA
shLNC15266-2	CTTCTTTCTCTAGCTTATA
shLNC3346-1	CCACCACACCTGGCTAATT
shLNC3346-2	GCTGCACAATATGTATTTA
shFOXP3-1	TCCTACCCACTGCTGGCAAAT
shFOXP3-2	TCCAGGACAGGCCACATTTCA

## Sheet: CRISPR Cas9 gRNAs
name	sequence
1845 gRNAL 1	CACCGAATTACCACAAATGGCCTTA
1845 gRNAL 2	AAACTAAGGCCATTTGTGGTAATTC
1845 gRNAR 1	CACCGCTAAGCTTATATCTAACAG
1845 gRNAR 2	AAACCTGTTAGATATAAGCTTAGC

## Sheet: CRISPR ON gRNAs
name	sequence
CRON 1F	CACCGCAACAGTGTGTGCTTAACACGTTT
CRON 1R	AAACGTGTTAAGCACACACTGTTGCGGTG
CRON 2F	CACCGTGTTTGGTACTTTGGTCATTGTTT
CRON 2R	AAACAATGACCAAAGTACCAAACACGGTG
CRON 3F	CACCGAAACAATACCCTTGCCAACTGTTT
CRON 3R	AAACAGTTGGCAAGGGTATTGTTTCGGTG

## Sheet: PCR primer list
name	sequence
1845 3' RACE inner primer-3	ACTGCAAGGCAGGAATTGGCTTGA
1845 3' RACE R	GCGAGCACAGAATTAATACGACTCACTATAGGT
FOXP3 F	GCTGATCCTTTTCTGTCAGTCCA
FOXP3 R	CCATCCTCCTTTCCTTGATCTTGA
FOXP3 overlap F	AAAAGCAGGCTCCGCGGCCGCATGCCCAACCCCAG
FOXP3 overlap R	AGAAAGCTGGGTCGGCGCGCCTCAGGGGCCAGGTG
DAZL overlap F	AGGCTCCGCGGCCGCATGTCTACTGCAAATCCTGA
DAZL overlap R	GTTAGTAGCTCCGCTTCCAACAGATTTAAGCATTG
LNC1845 F	CGCGCCTGTGAGATTCTTCT
LNC1845 R	TGTGTAGGAGAAGGCATTAGACC
LNC1845 overlap F	TTCTAGAGCGGCCGCCTTGCCAGTGCTATTTG
LNC1845 overlap R	GCCAGATCGGGATCCTTGACTAAATCAGGTTTAT
LNC1845KO F1	TAAGTGTTGGGTGGGAGGAACT
LNC1845KO R1	AGCAGTCTGTCCAGGTAACAAC
LNC1845KO F2	CCACGCACGAGTATACAGCC
LNC1845KO R2	AACCCCTGAGTAGCCACAAAA
LNC1845KO F3	TGACACCTACTCAGACAATGCG
LNC1845KO R3	GCGAACACTTTCTCATCGCC
PAKI F1	TAAGTGTTGGGTGGGAGGAACT
PAKI R1	AGCAGTCTGTCCAGGTAACAAC
PAKI F2	GGAGGAACTAGGAACTTCGC
PAKI R2	GGAAAGGACAGTGGGAGTGG
PAKI F3	AAACAAGCTCTGTTCAGAAAGCAGG
PAKI R3	TAGACACACCTTAACCACAGCATC
EF1AKI F1	GGGGTAGTCTCAAGCT
EF1AKI R1	AGCAGTCTGTCCAGGTAACAAC
EF1AKI F2	AAACAAGCTCTGTTCAGAAAGCAGG
EF1AKI R2	TAGGGGCGGGACTATGGTTG
EF1AKI F3	GCAACCTCCCCTTCTACGAG
EF1AKI R3	TAGACACACCTTAACCACAGCATC
EF1AKI F4	CCACGCACGAGTATACAGCC
EF1AKI R4	AACCCCTGAGTAGCCACAAAA
