# Supplementary figures and images for: Single-cell profiling of lncRNAs in human germ cells and molecular analysis reveals transcriptional regulation of LNC1845 on LHX8
Source: eLife journal article supplement (doi:10.7554/elife.78421), 2023-01-05

LNC1845

PC

NC

Marker

Figure S4B

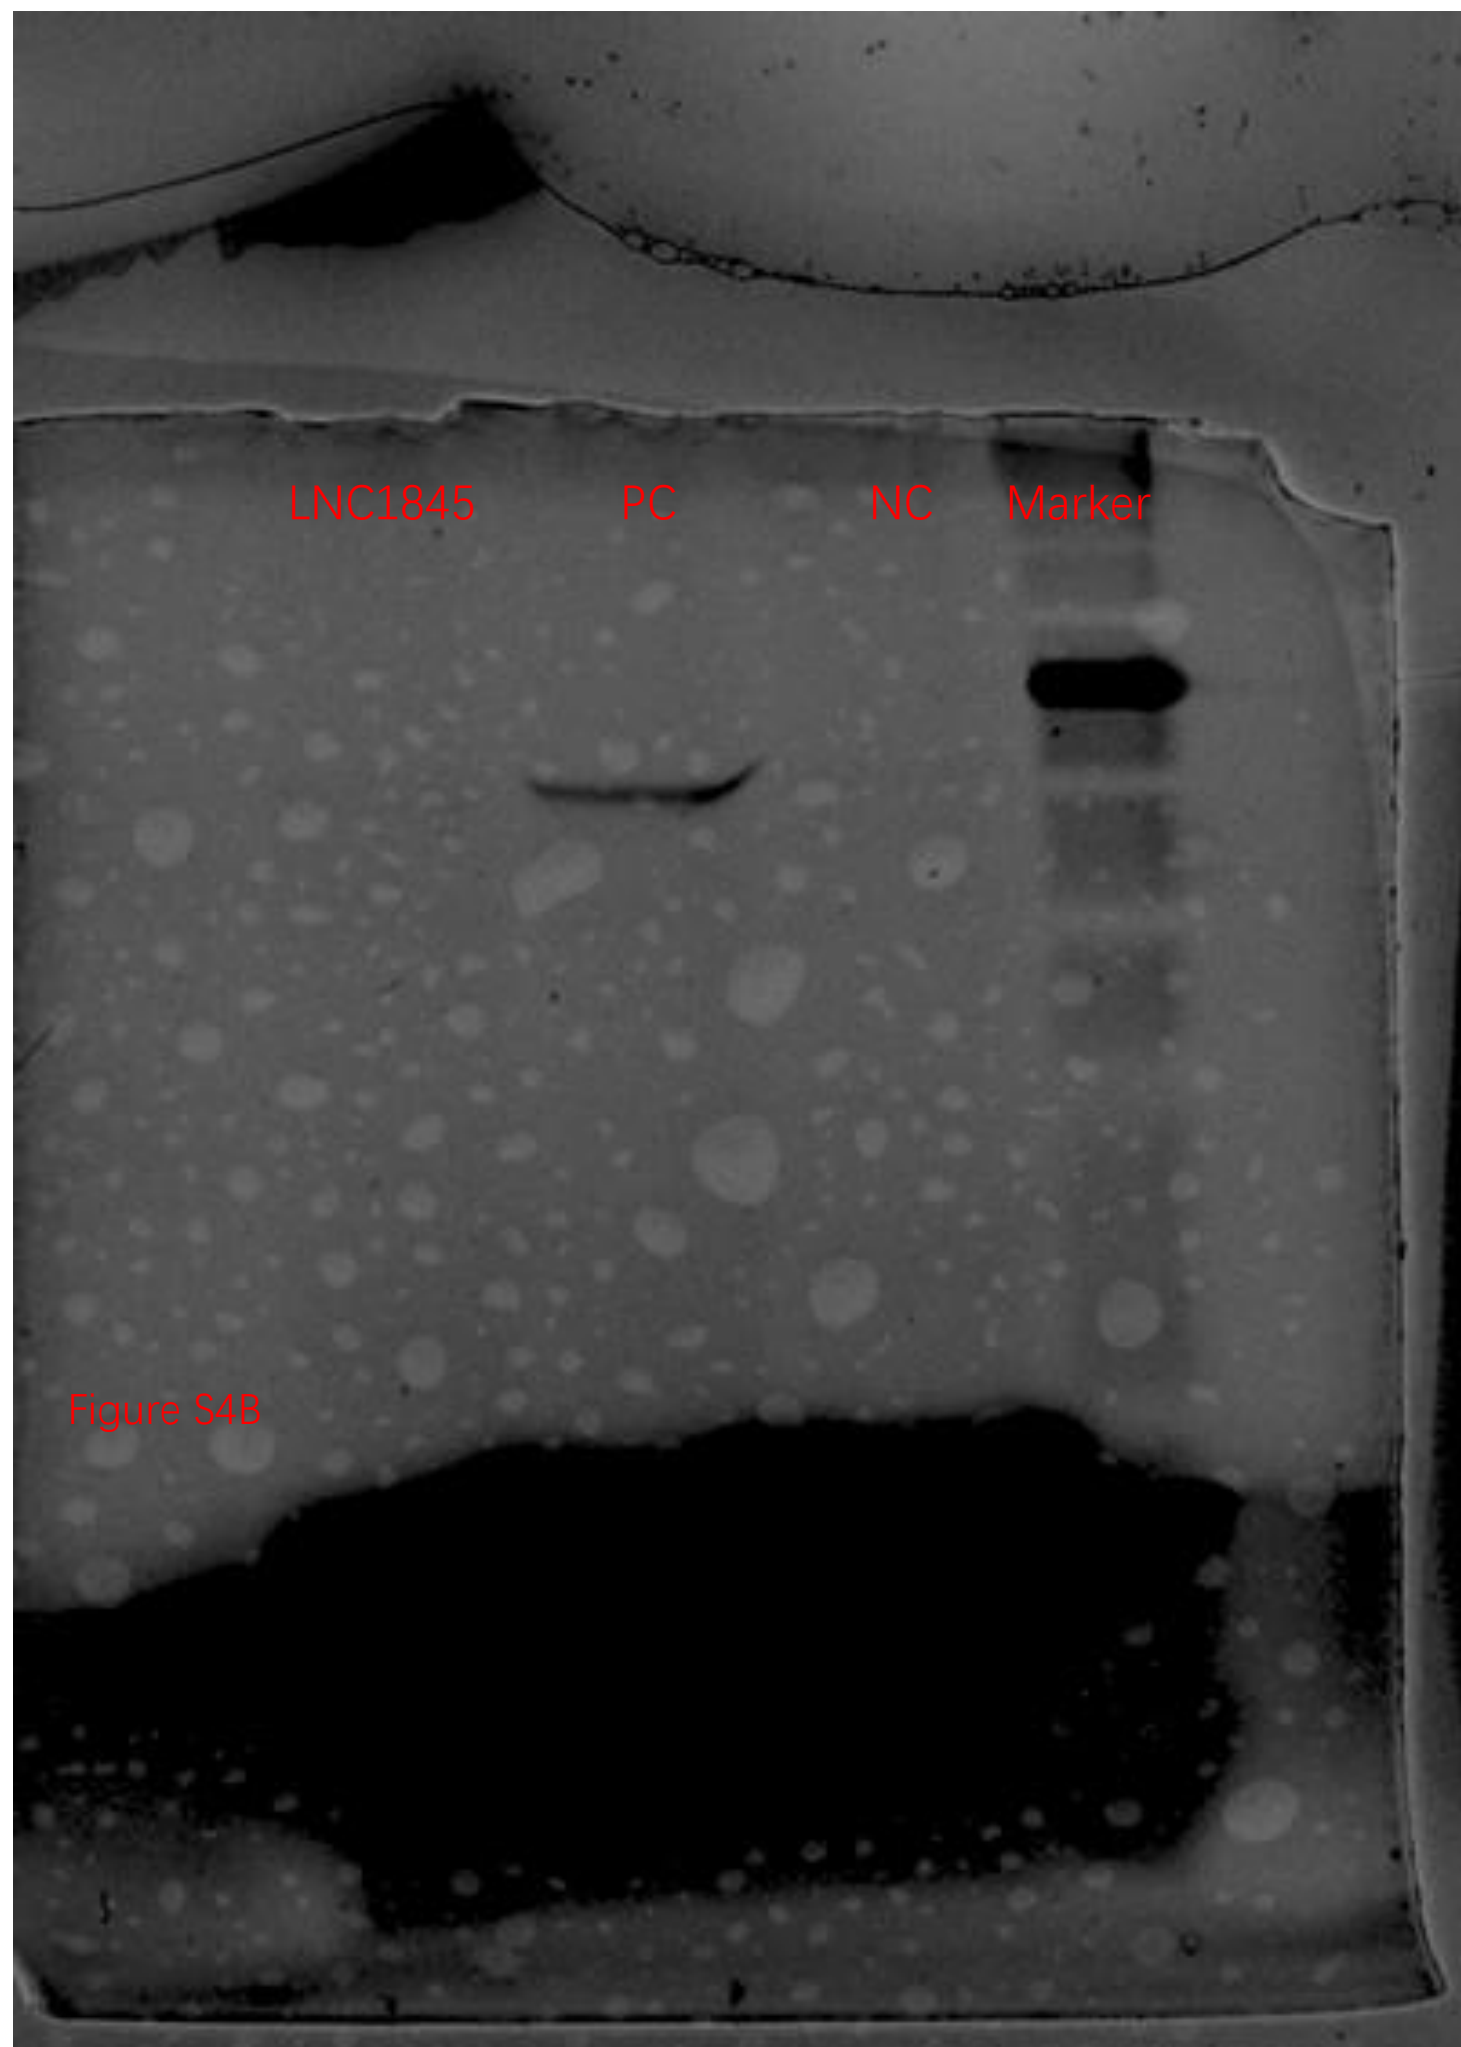

Supplement: fig4-figsupp1-data1 [file Figure 4-figure supplement 1B-source data.pdf › Figure 4-figure supplement 1B-source data.pdf]

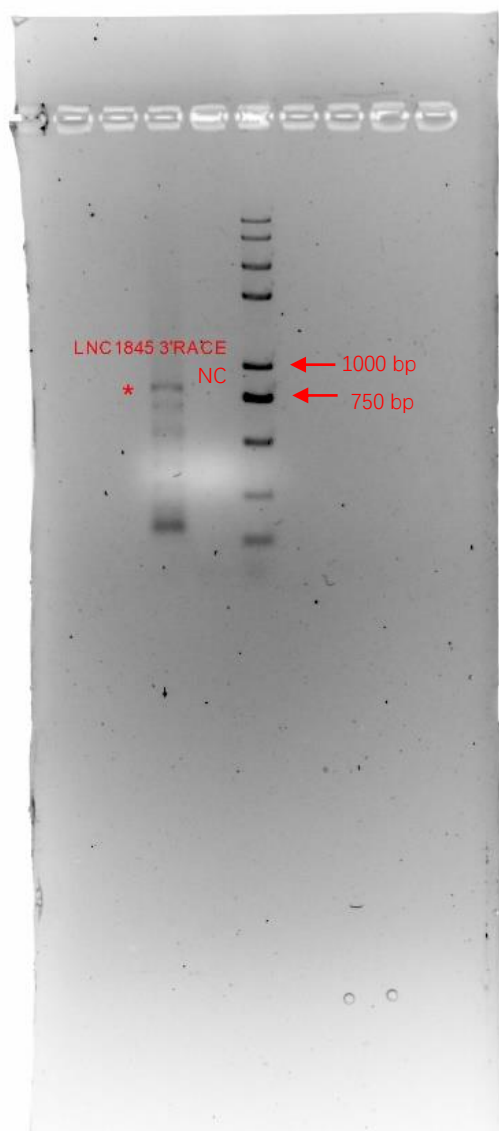

Figure S4D

Supplement: fig4-figsupp1-data1 [file Figure 4-figure supplement 1D-source data.pdf › Figure 4-figure supplement 1D-source data.pdf]

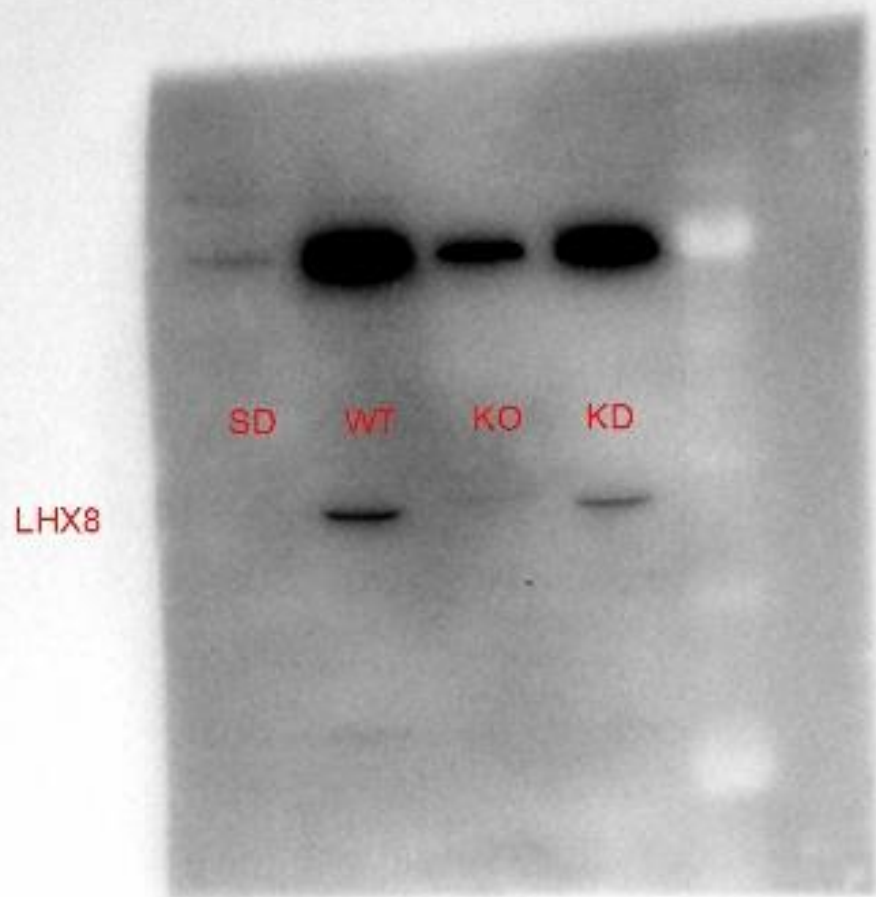

Figure 5C-1

Supplement: fig5-data1 [file elife-78421-fig5-data1-v2.zip]

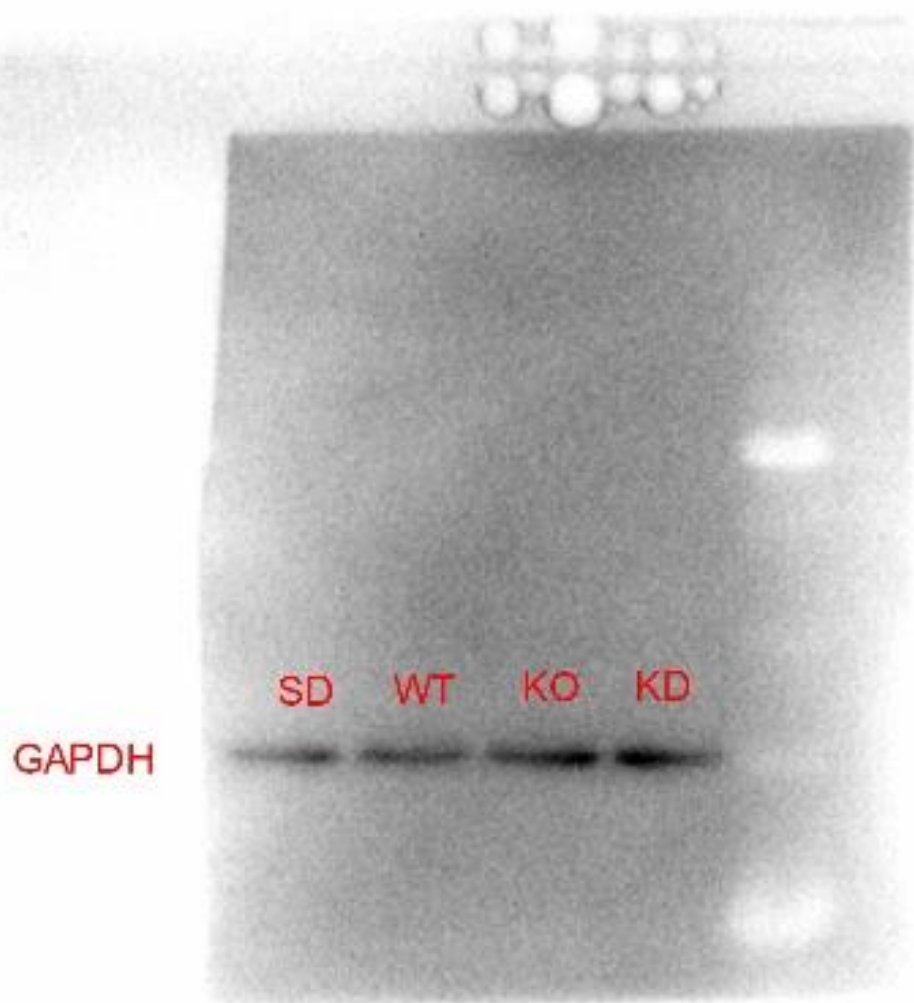

Figure 5C-2

Supplement: fig5-data2 [file elife-78421-fig5-data2-v2.zip]

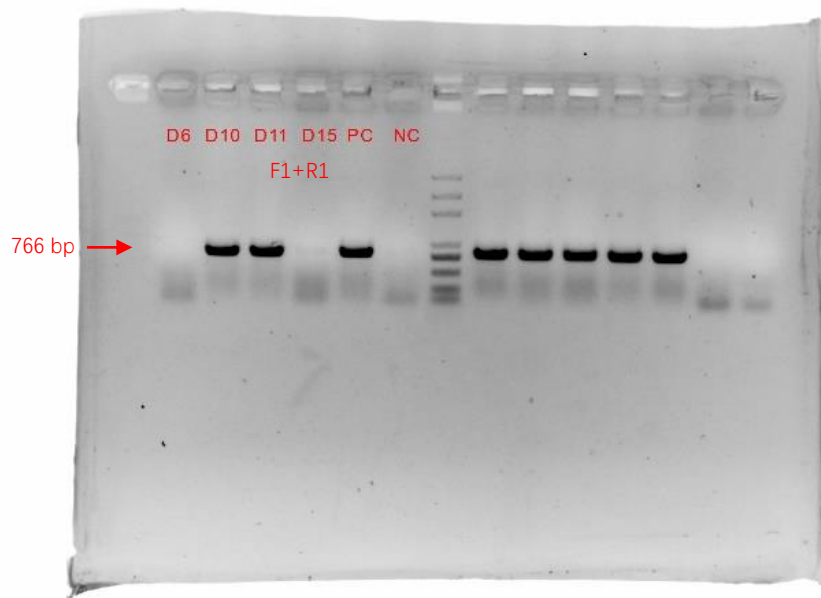

Figure S6A-1

Supplement: fig5-figsupp1-data1 [file Figure 5-figure supplement 1A-source data 1.pdf › Figure 5-figure supplement 1A-source data 1.pdf]

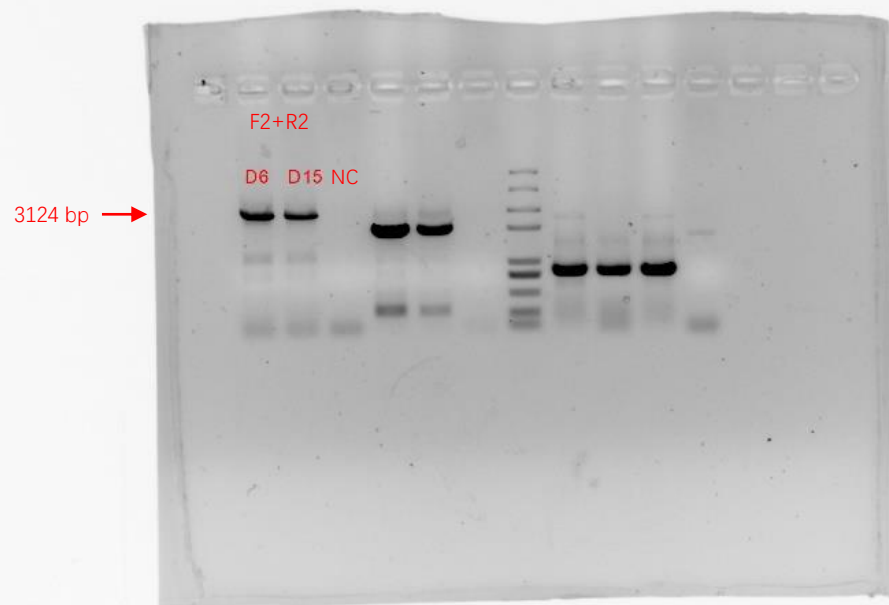

Figure S6A-2

Supplement: fig5-figsupp1-data1 [file Figure 5-figure supplement 1A-source data 2.pdf › Figure 5-figure supplement 1A-source data 2.pdf]

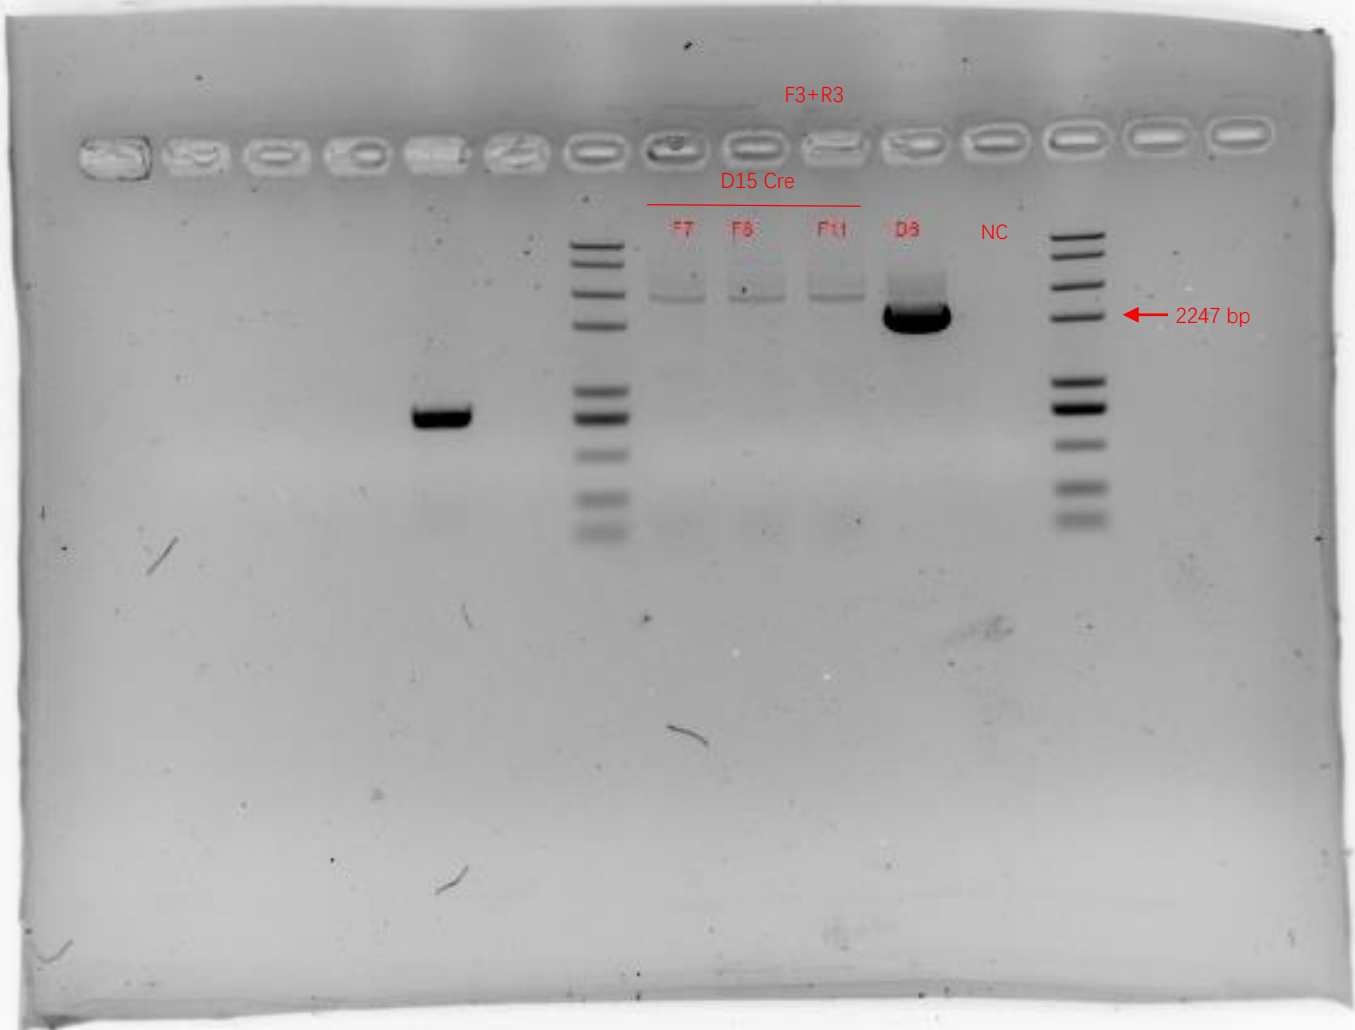

Figure S6A-3

Supplement: fig5-figsupp1-data1 [file Figure 5-figure supplement 1A-source data 3.pdf › Figure 5-figure supplement 1A-source data 3.pdf]

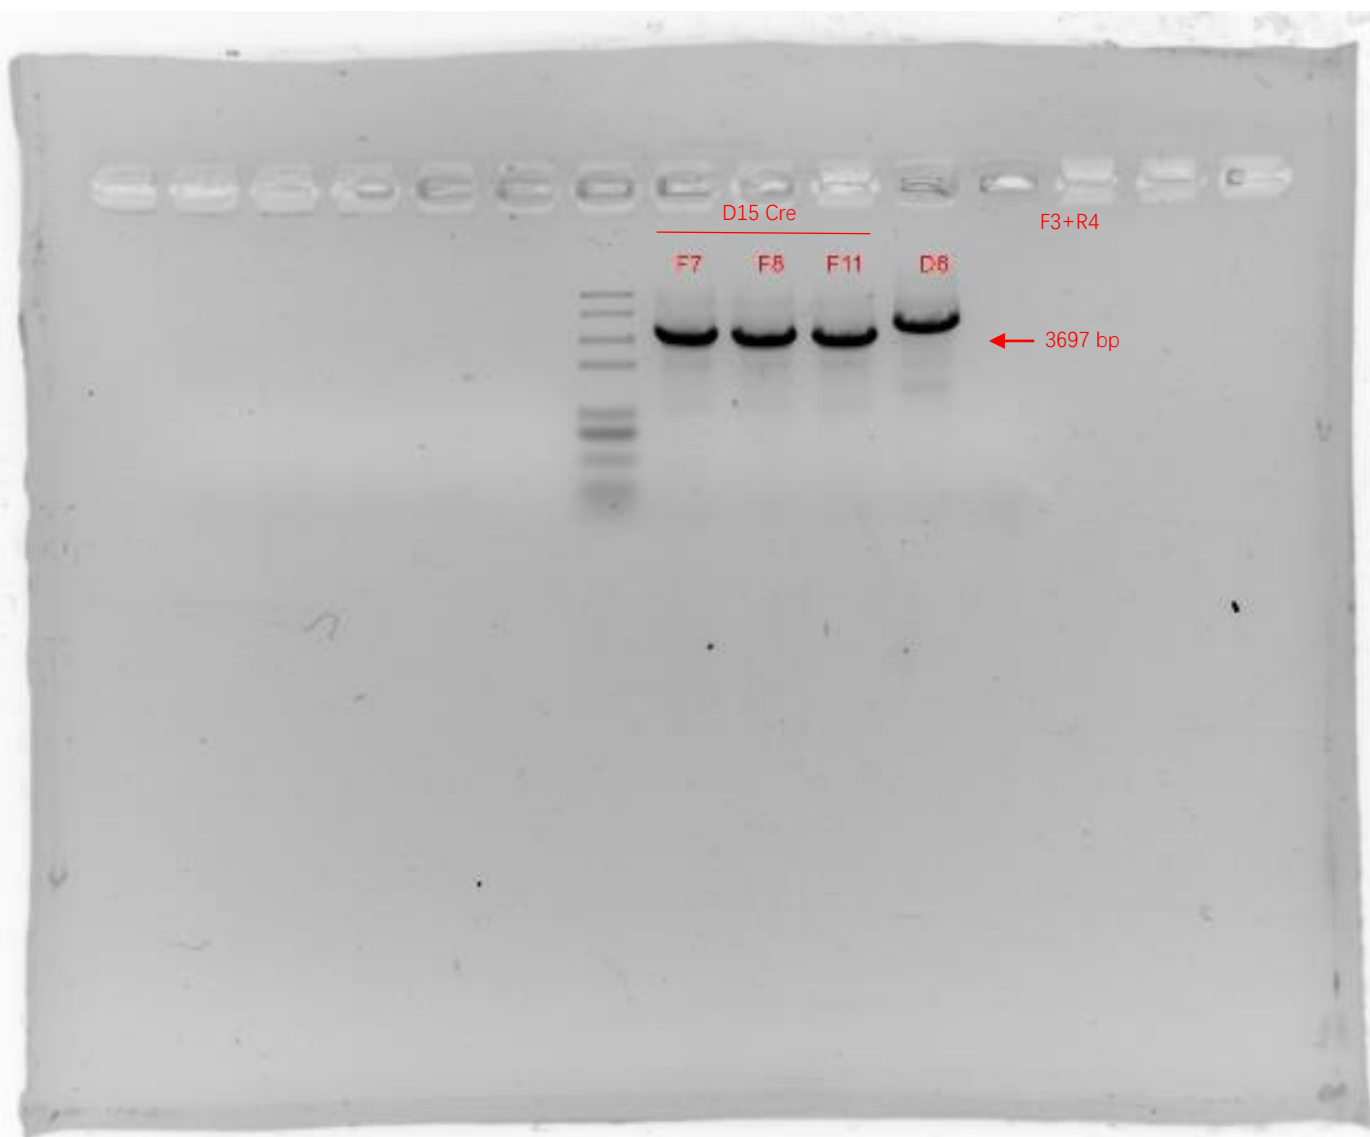

Figure S6A-4

Supplement: fig5-figsupp1-data1 [file Figure 5-figure supplement 1A-source data 4.pdf › Figure 5-figure supplement 1A-source data 4.pdf]

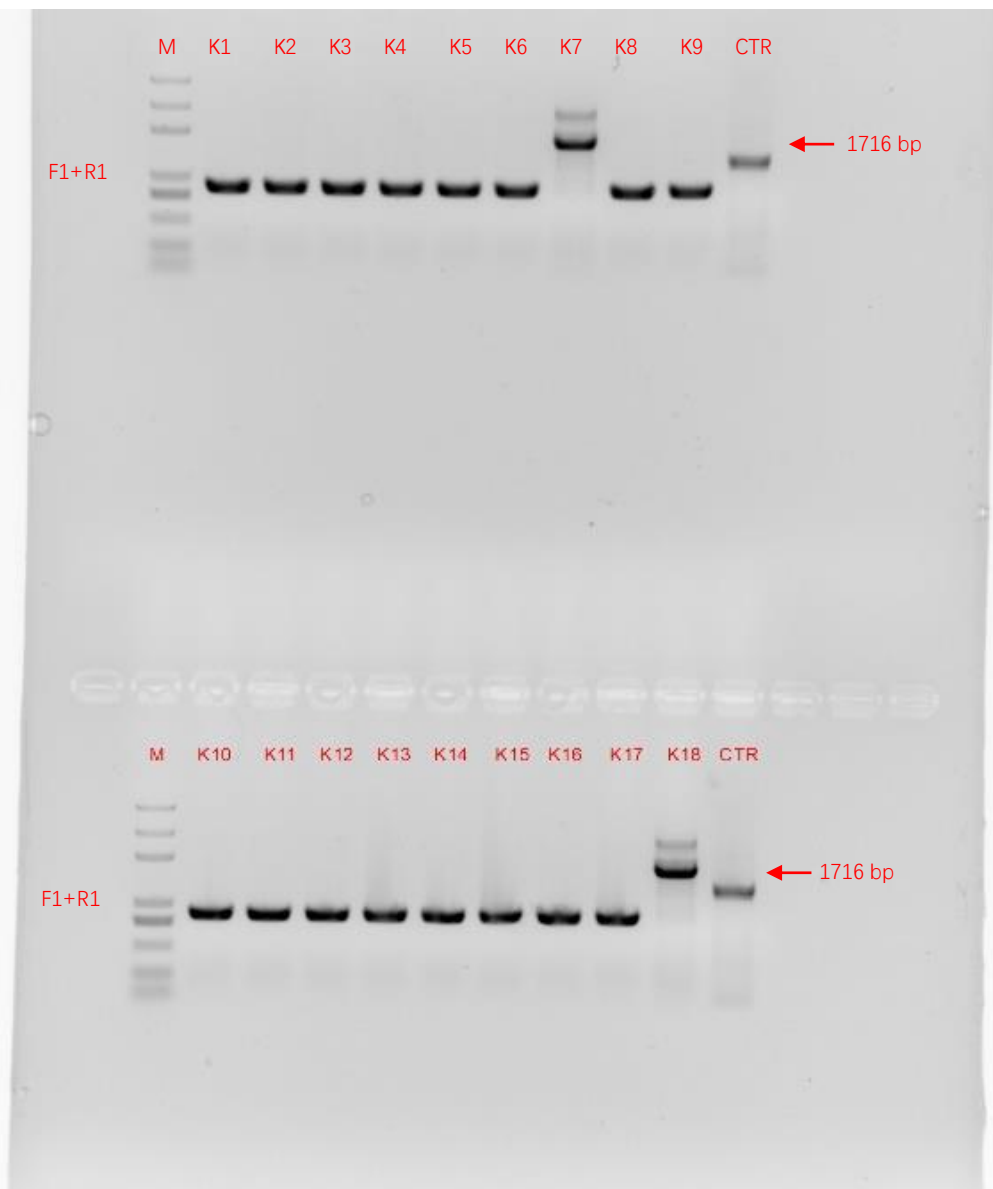

Figure S6E-1.2

Supplement: fig5-figsupp1-data2 [file Figure 5-figure supplement 1E-source data 1,2.pdf › Figure 5-figure supplement 1E-source data 1,2.pdf]

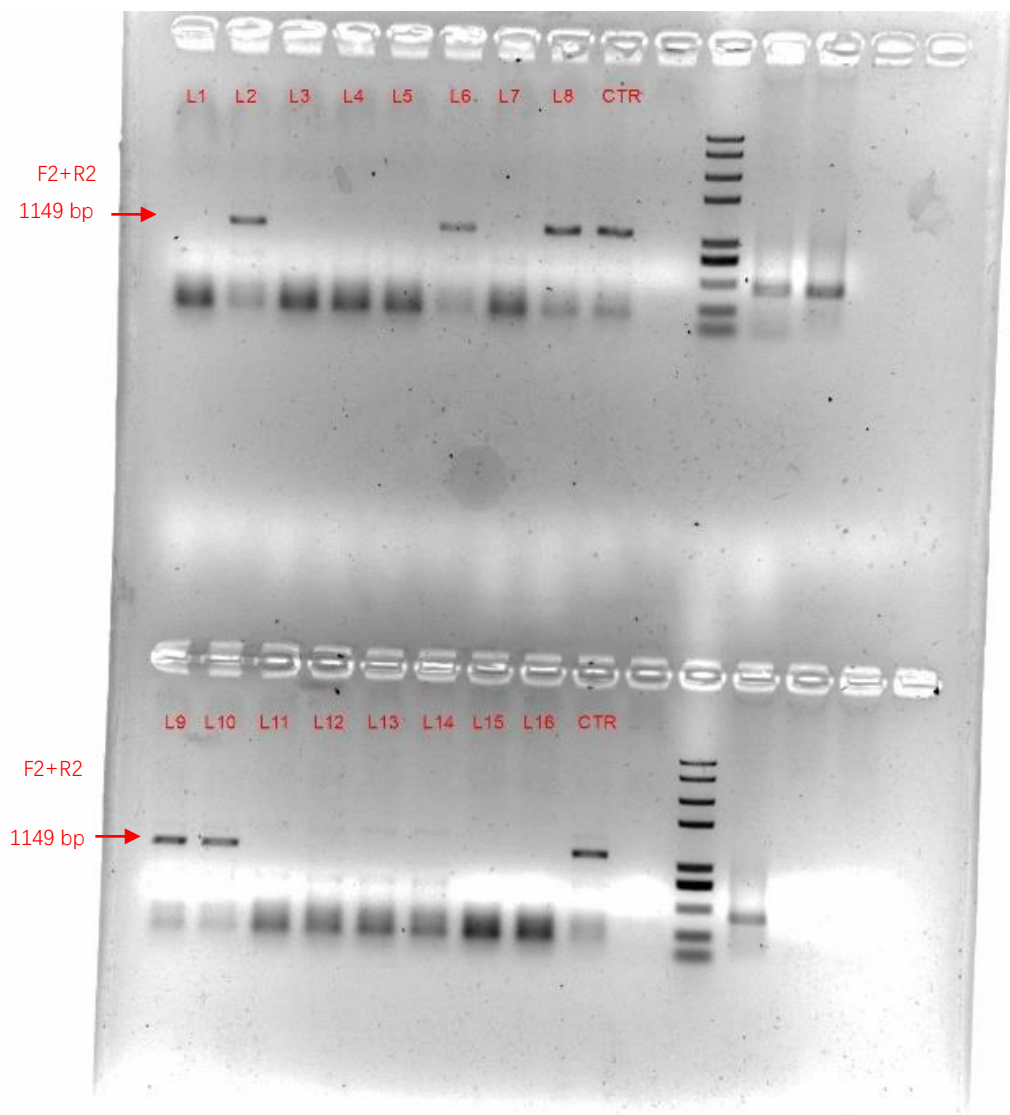

Figure S6E-3 4

Supplement: fig5-figsupp1-data2 [file Figure 5-figure supplement 1E-source data 3,4.pdf › Figure 5-figure supplement 1E-source data 3,4.pdf]

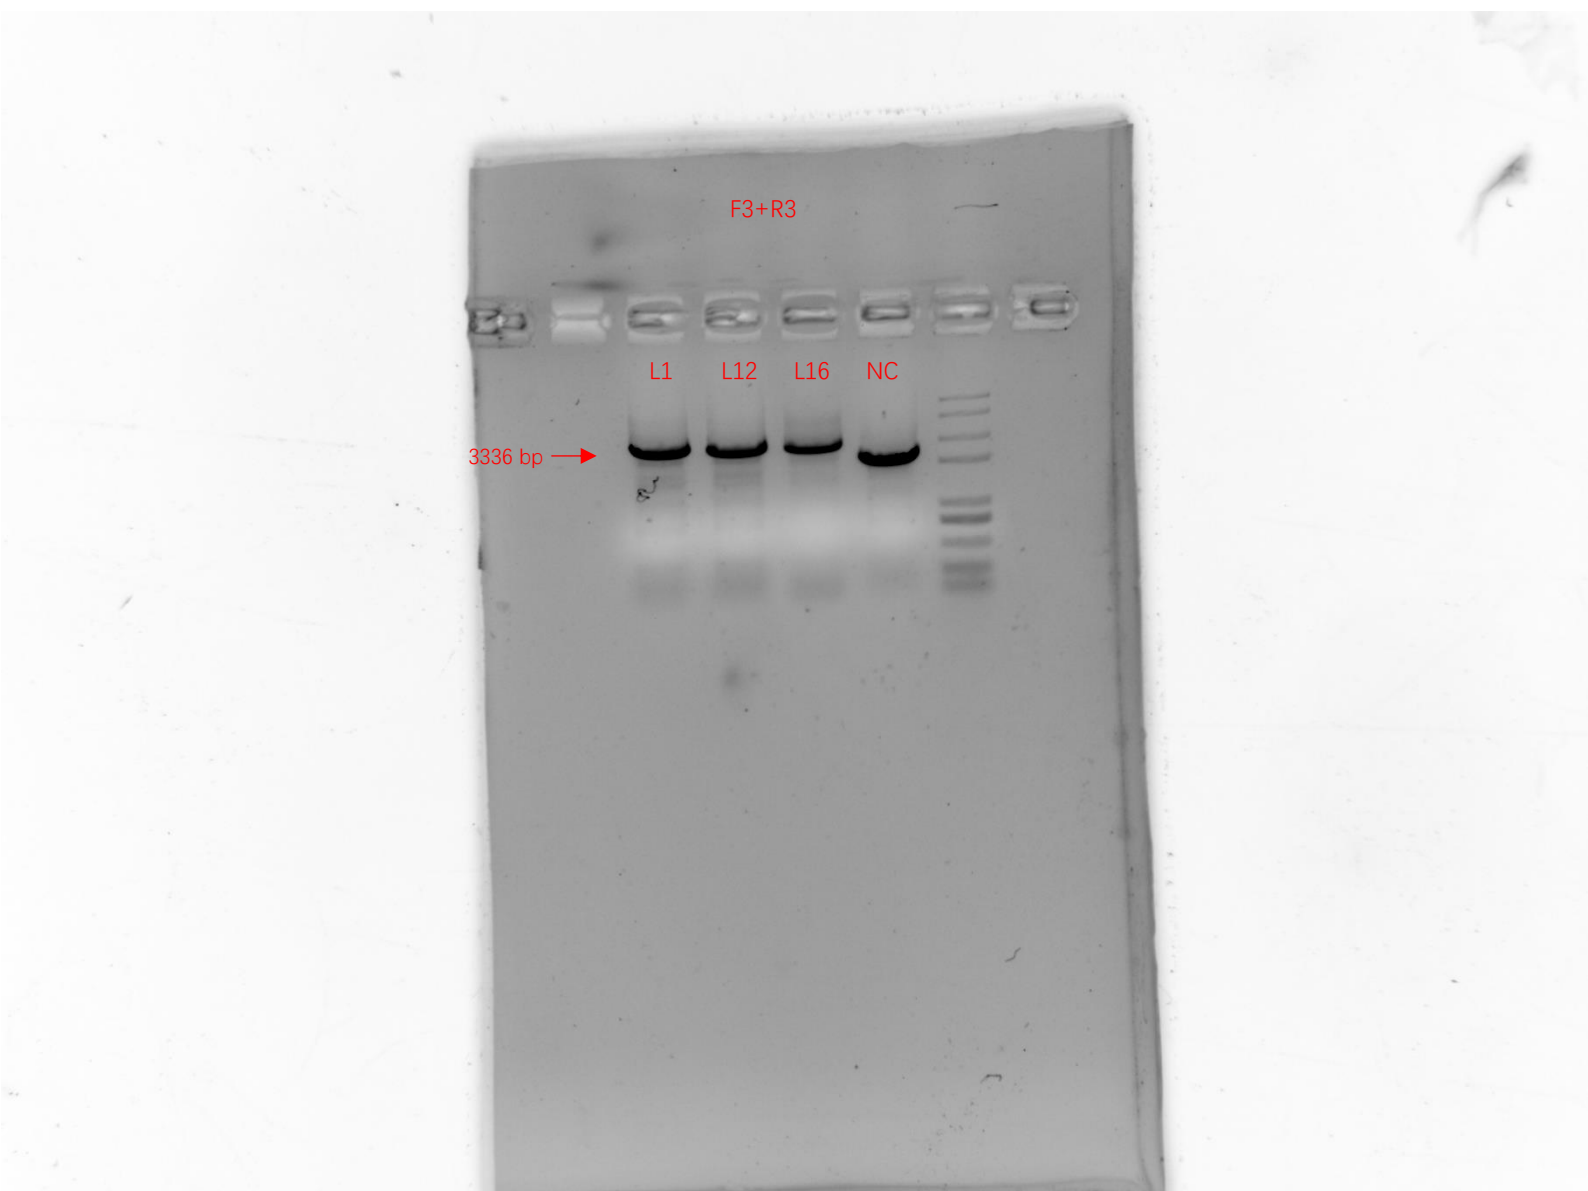

Figure S6E-5

Supplement: fig5-figsupp1-data2 [file Figure 5-figure supplement 1E-source data 5.pdf › Figure 5-figure supplement 1E-source data 5.pdf]

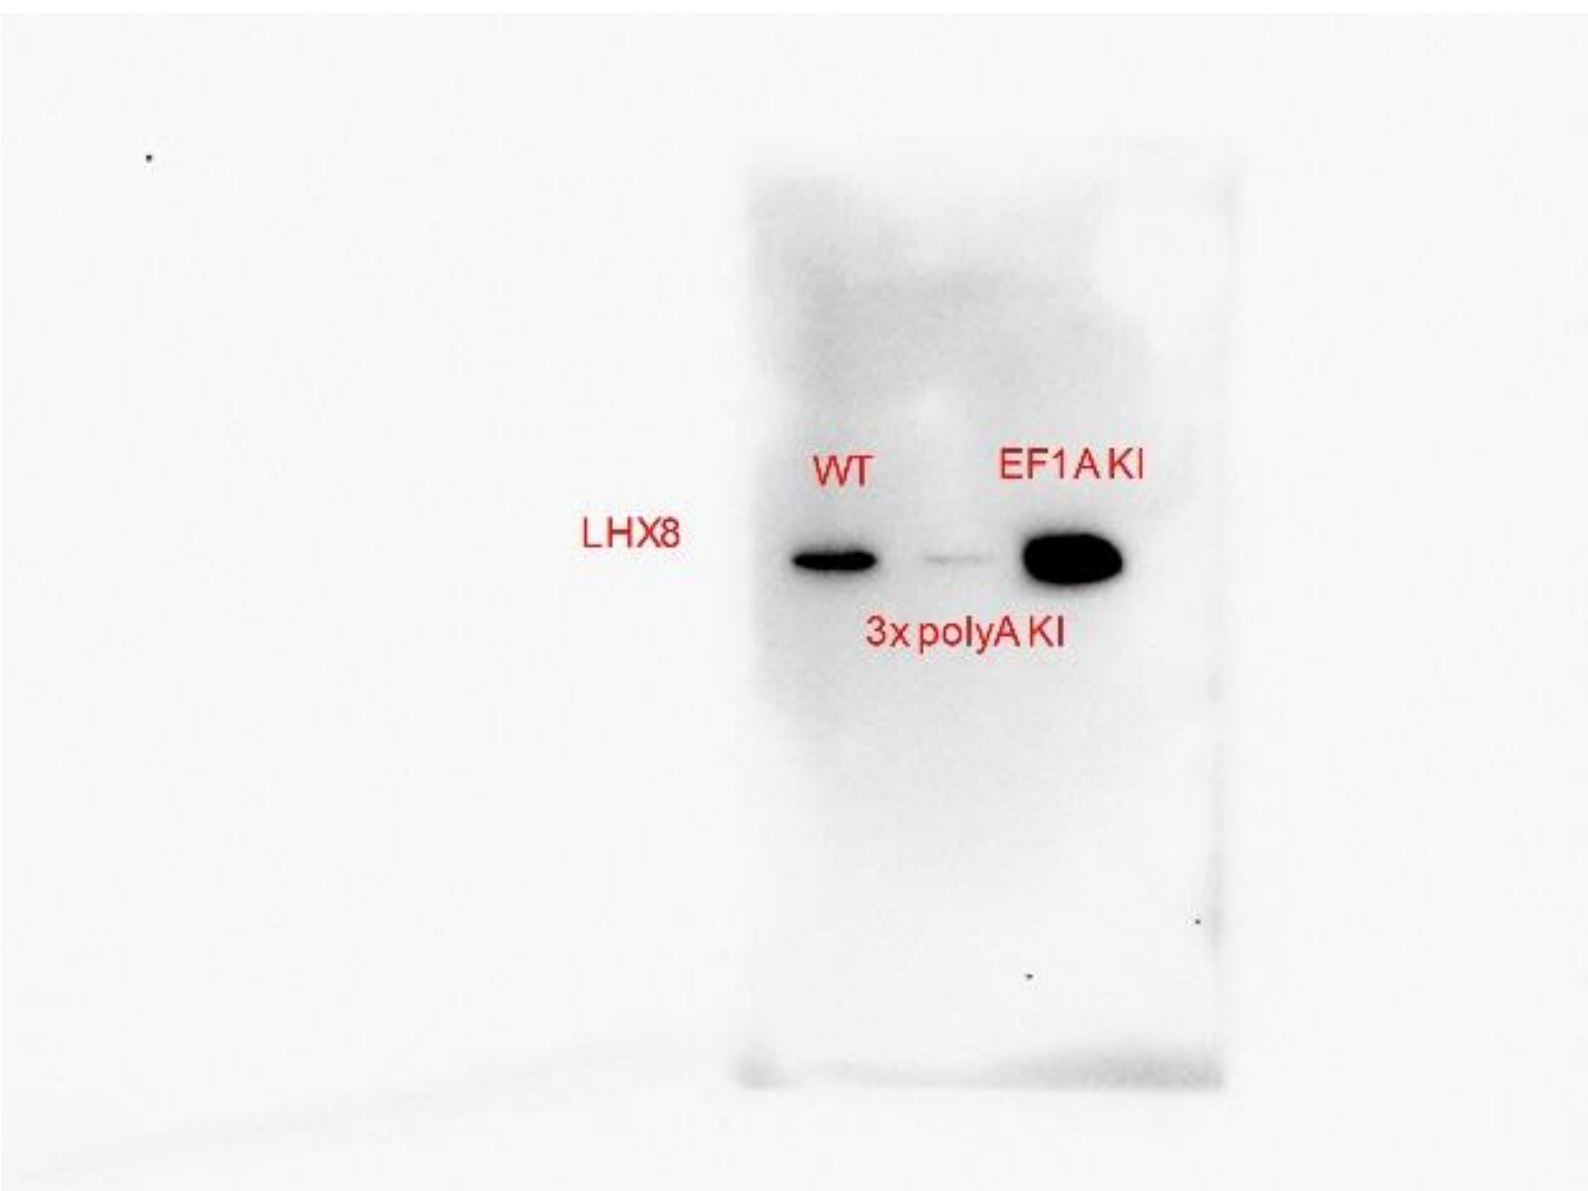

Figure 6C-1

Supplement: fig6-data1 [file elife-78421-fig6-data1-v2.zip]

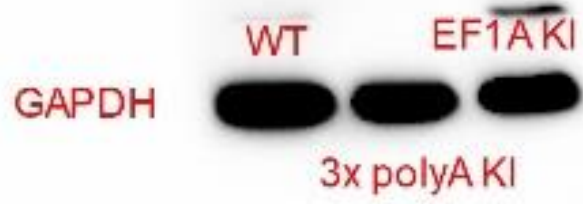

Figure 6C-2

Supplement: fig6-data2 [file Figure 6C-source data 2.pdf › Figure 6C-source data 2.pdf]

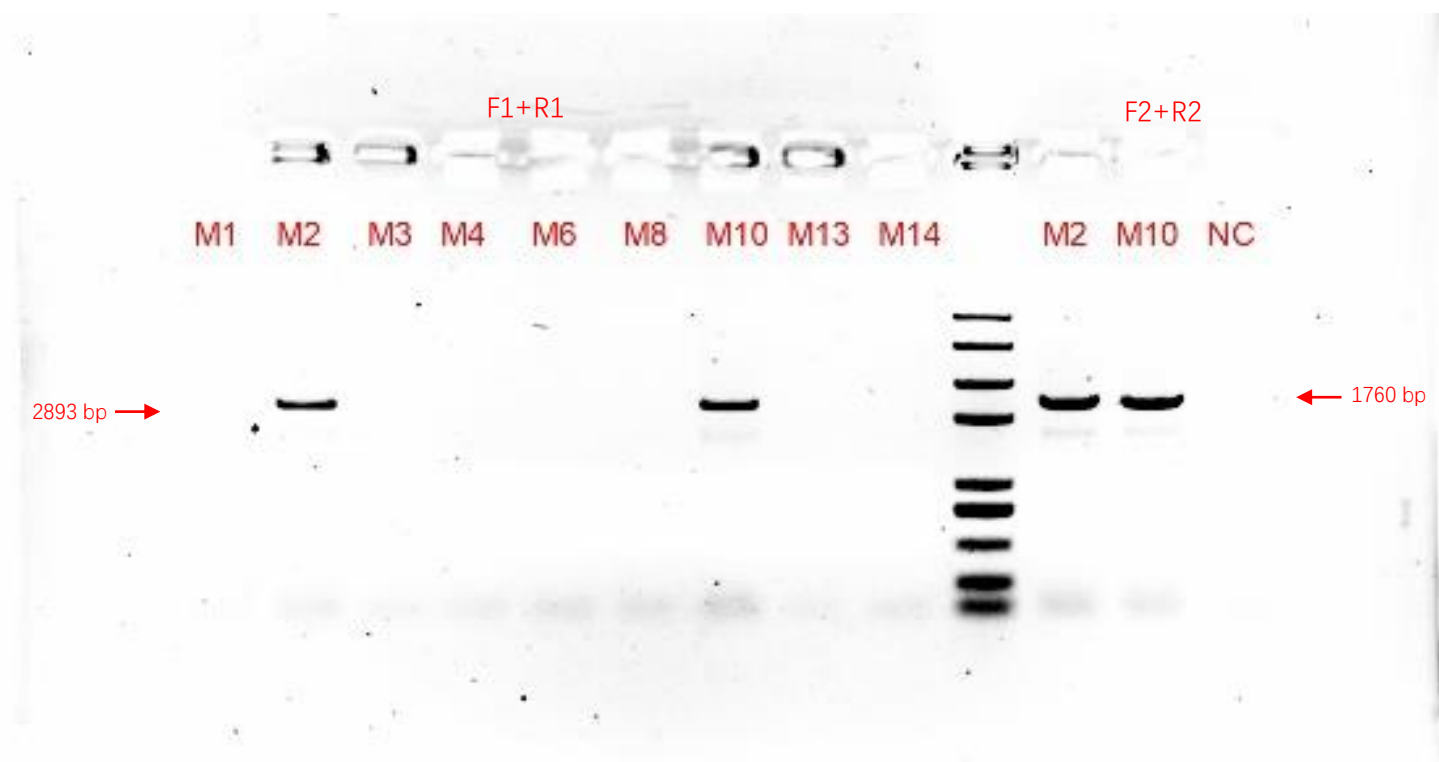

Figure S7A-1 2

Supplement: fig6-figsupp1-data1 [file Figure 6-figure supplement 1A-source data 1,2.pdf › Figure 6-figure supplement 1A-source data 1,2.pdf]

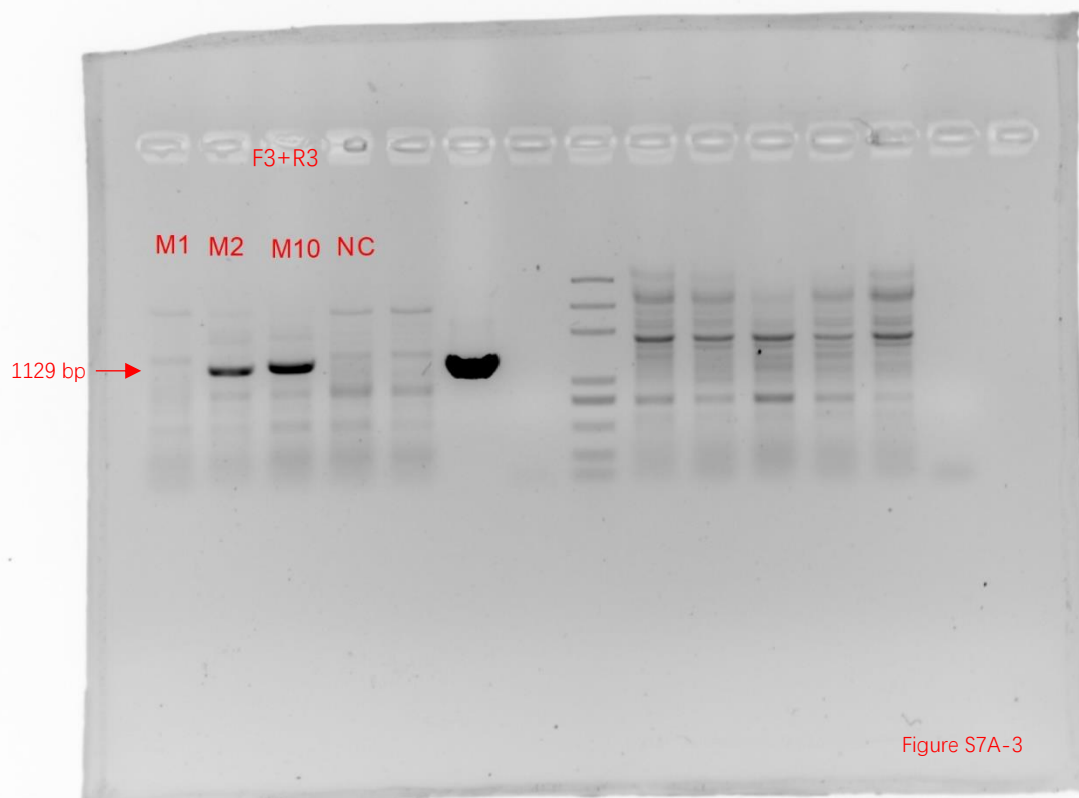

Figure S7A-3

Supplement: fig6-figsupp1-data1 [file Figure 6-figure supplement 1A-source data 3.pdf › Figure 6-figure supplement 1A-source data 3.pdf]

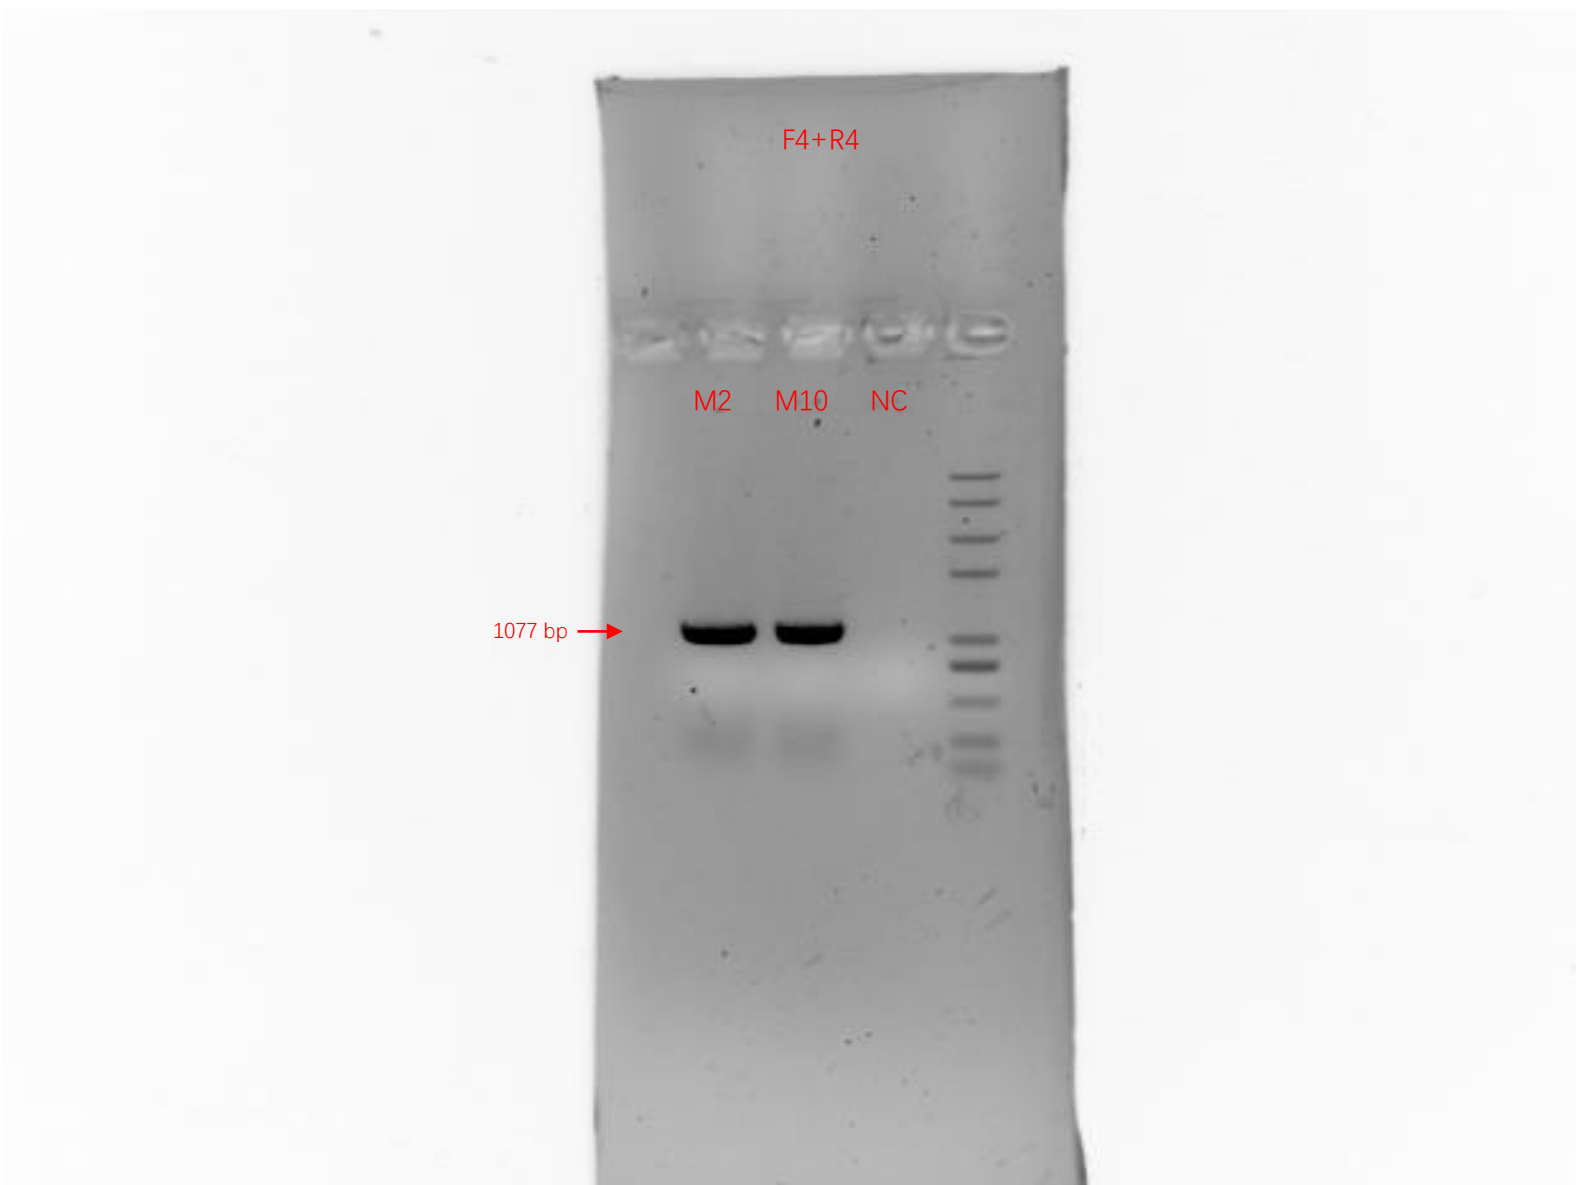

Figure S7A-4

Supplement: fig6-figsupp1-data1 [file Figure 6-figure supplement 1A-source data 4.pdf › Figure 6-figure supplement 1A-source data 4.pdf]

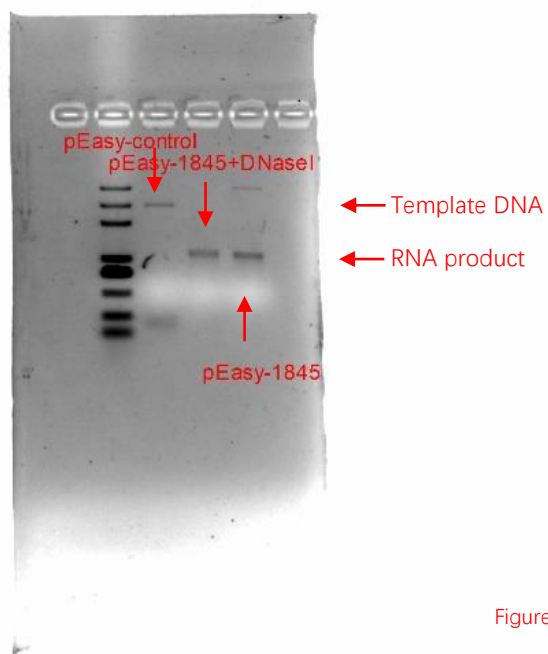

Figure S7D

Supplement: fig6-figsupp1-data2 [file Figure 6-figure supplement 1D-source data.pdf › Figure 6-figure supplement 1D-source data.pdf]
